# Supplementary material for: A structure–kinetic relationship study using matched molecular pair analysis
Source: RSC Med Chem. 2020 Sep 21;11(11):1285–94. doi: 10.1039/d0md00178c (PMC8126976; doi:10.1039/d0md00178c)
Supplement: MD-011-D0MD00178C-s001 [file MD-011-D0MD00178C-s001.xlsx]

## Sheet: default
target	ID	assay_method	journal	title	pubmed_id	target_class	target_comment	cpd_id	smiles_raw	pKD	pkon	pkoff	source	smiles_washed	logPow	TPSA	Molecular_Weight	rdkit_TPSA	max_ChEMBL_phase
A1a	A1a_Radioligand_114	Radioligand	K4DD_db	K4DD_db	-1	GPCR	NA	147863	S(F)(=O)(=O)c1ccc(C(=O)OCCCN2C(=O)N(CCC)C(=O)c3nc(C4CCCC4)[nH]c23)cc1	9.5682	-4.79005	4.77815	K4DD	S(F)(=O)(=O)c1ccc(C(=O)OCCCN2C(=O)N(CCC)C(=O)c3nc(C4CCCC4)[nH]c23)cc1	3.073	129.74	506.555	133.12	0
A1a	A1a_Radioligand_114	Radioligand	K4DD_db	K4DD_db	-1	GPCR	NA	3000059	O=C(Nc1c(C#N)c(-c2cc3OCOc3cc2)nc(-c2ccccc2)n1)CCCC	8.20412	-6.90309	1.30103	K4DD	O=C(Nc1c(C#N)c(-c2cc3OCOc3cc2)nc(-c2ccccc2)n1)CCCC	3.861	97.13	400.438	97.13	0
A1a	A1a_Radioligand_114	Radioligand	K4DD_db	K4DD_db	-1	GPCR	NA	3000060	O=C(Nc1nc(c(C#N)c(-c2ccccc2)n1)-c1cc2OCOc2cc1)C(CC)CC	8.5376	-6.22185	2.31575	K4DD	O=C(Nc1nc(c(C#N)c(-c2ccccc2)n1)-c1cc2OCOc2cc1)C(CC)CC	4.12	97.13	414.465	97.13	0
A1a	A1a_Radioligand_114	Radioligand	K4DD_db	K4DD_db	-1	GPCR	NA	346317	c1(-c2ccccc2)[nH]c-2nc(C3CCCCC3)nc-2c(-c2ccccc2)n1	9.19189	-5.8451	3.34679	K4DD	c1(-c2ccccc2)[nH]c-2nc(C3CCCCC3)nc-2c(-c2ccccc2)n1	4.74606	54.46	354.457	54.46	0
A1a	A1a_Radioligand_114	Radioligand	K4DD_db	K4DD_db	-1	GPCR	NA	346318	Clc1ccc(-c2[nH]c(-c3ccccc3)nc-3nc(C4CCCCC4)nc2-3)cc1	7.4994	-4.30103	3.19837	K4DD	Clc1ccc(-c2[nH]c(-c3ccccc3)nc-3nc(C4CCCCC4)nc2-3)cc1	5.33806	54.46	388.902	54.46	0
A1a	A1a_Radioligand_114	Radioligand	K4DD_db	K4DD_db	-1	GPCR	NA	346322	Cc1ccc(-c2[nH]c(-c3ccccc3)nc-3nc(C4CCCCC4)nc2-3)cc1	7.68899	-4.85532	2.83367	K4DD	Cc1ccc(-c2[nH]c(-c3ccccc3)nc-3nc(C4CCCCC4)nc2-3)cc1	5.04406	54.46	368.484	54.46	0
A1a	A1a_Radioligand_114	Radioligand	K4DD_db	K4DD_db	-1	GPCR	NA	346460	c1(-c2ccccc2)[nH]c-2nc(C3CCCC3)nc-2c(-c2ccccc2)n1	9.45593	-6	3.45593	K4DD	c1(-c2ccccc2)[nH]c-2nc(C3CCCC3)nc-2c(-c2ccccc2)n1	4.30406	54.46	340.43	54.46	0
A1a	A1a_Radioligand_114	Radioligand	K4DD_db	K4DD_db	-1	GPCR	NA	365442	O=C1N(CCC)C(=O)c2[nH]c(C3CCCC3)nc2N1CCC	8.74819	-6.36798	2.38021	K4DD	O=C1N(CCC)C(=O)c2[nH]c(C3CCCC3)nc2N1CCC	2.318	69.3	304.394	72.68	0
A1a	A1a_Radioligand_114	Radioligand	K4DD_db	K4DD_db	-1	GPCR	NA	432191	N#Cc1c(-c2cc3OCOc3cc2)nc(N)nc1-c1ccccc1	8.95988	-7.01424	1.94564	K4DD	N#Cc1c(-c2cc3OCOc3cc2)nc(N)nc1-c1ccccc1	2.428	94.05	316.32	94.05	0
A1a	A1a_Radioligand_114	Radioligand	K4DD_db	K4DD_db	-1	GPCR	NA	432227	Clc1ccc(C(=O)Nc2nc(c(C#N)c(-c3ccccc3)n2)-c2ccccc2)cc1	8.35807	-6.33579	2.02228	K4DD	Clc1ccc(C(=O)Nc2nc(c(C#N)c(-c3ccccc3)n2)-c2ccccc2)cc1	4.94	78.67	410.864	78.67	0
A2a	A2a_Radioligand_113	Radioligand	K4DD_db	K4DD_db	-1	GPCR	NA	192029	O=C(O)CCc1ccc(CCNc2nc(N)c3ncn(C4C(O)C(O)C(C(=O)NCC)O4)c3n2)cc1	6.39794	-2.92082	3.47712	K4DD	O=C(O)CCc1ccc(CCNc2nc(N)c3ncn(C4C(O)C(O)C(C(=O)NCC)O4)c3n2)cc1	-0.41394	197.74	499.528	197.74	0
A2a	A2a_Radioligand_113	Radioligand	K4DD_db	K4DD_db	-1	GPCR	NA	201428	S(Cc1[nH]ccn1)c1c(C#N)c(c(C#N)c(N)n1)-c1ccc(O)cc1	7.67966	-5.26324	2.41642	K4DD	S(Cc1[nH]ccn1)c1c(C#N)c(c(C#N)c(N)n1)-c1ccc(O)cc1	1.761	135.4	348.39	135.4	0
A2a	A2a_Radioligand_113	Radioligand	K4DD_db	K4DD_db	-1	GPCR	NA	201620	S(Cc1[nH]ccn1)c1c(C#N)c(c(C#N)c(N)n1)-c1cc(O)ccc1	7.74172	-5.42597	2.31575	K4DD	S(Cc1[nH]ccn1)c1c(C#N)c(c(C#N)c(N)n1)-c1cc(O)ccc1	1.798	135.4	348.39	135.4	0
A2a	A2a_Radioligand_113	Radioligand	K4DD_db	K4DD_db	-1	GPCR	NA	202024	S(Cc1[nH]ccn1)c1c(C#N)c(c(C#N)c(N)n1)-c1ccccc1	7.7253	-5.15127	2.57403	K4DD	S(Cc1[nH]ccn1)c1c(C#N)c(c(C#N)c(N)n1)-c1ccccc1	2.069	115.17	332.391	115.17	0
A2a	A2a_Radioligand_113	Radioligand	K4DD_db	K4DD_db	-1	GPCR	NA	3000055	OCC1C(O)C(O)C(n2c(NC)nc3c(N)nc(C#CCCCC)nc23)O1	6.66901	-3.66901	3	K4DD	OCC1C(O)C(O)C(n2c(NC)nc3c(N)nc(C#CCCCC)nc23)O1	0.13206	151.57	376.417	151.57	0
A2a	A2a_Radioligand_113	Radioligand	K4DD_db	K4DD_db	-1	GPCR	NA	3000056	OCC1C(O)C(O)C(n2c3nc(C#CCCCC)nc(N)c3nc2)O1	7.77815	-4.60206	3.17609	K4DD	OCC1C(O)C(O)C(n2c3nc(C#CCCCC)nc(N)c3nc2)O1	0.11806	139.54	347.375	139.54	0
A2a	A2a_Radioligand_113	Radioligand	K4DD_db	K4DD_db	-1	GPCR	NA	3000057	S(CC1C(O)C(O)C(n2c3nc(C#CCCCC)nc(N)c3nc2)O1)C	6.94885	-4.12494	2.82391	K4DD	S(CC1C(O)C(O)C(n2c3nc(C#CCCCC)nc(N)c3nc2)O1)C	1.36606	119.31	377.469	119.31	0
A2a	A2a_Radioligand_113	Radioligand	K4DD_db	K4DD_db	-1	GPCR	NA	3000058	OCC1C(O)C(O)C(n2c3nc(C=CCCCC)nc(N)c3nc2)O1	7.20412	-4.12494	3.07918	K4DD	OCC1C(O)C(O)C(n2c3nc(C=CCCCC)nc(N)c3nc2)O1	0.01606	139.54	349.391	139.54	0
A2a	A2a_Radioligand_113	Radioligand	K4DD_db	K4DD_db	-1	GPCR	NA	466130	O=C(NCC)C1C(O)C(O)C(n2c3ncnc(N)c3nc2)O1	7.22185	-3.92082	3.30103	K4DD	O=C(NCC)C1C(O)C(O)C(n2c3ncnc(N)c3nc2)O1	-2.15694	148.41	308.298	148.41	0
A2a	A2a_Radioligand_113	Radioligand	K4DD_db	K4DD_db	-1	GPCR	NA	624199	O=C(NCCNC(=O)c1nc(NCC(c2ccccc2)c2ccccc2)c2ncn(C3C(O)C(O)C(C(=O)NCC)O3)c2n1)NC1CCN(c2ncccc2)CC1	8.09691	-3.92082	4.17609	K4DD	O=C(NCCNC(=O)c1nc(NCC(c2ccccc2)c2ccccc2)c2ncn(C3C(O)C(O)C(C(=O)NCC)O3)c2n1)NC1CCN(c2ncccc2)CC1	1.27006	220.78	777.887	220.78	2
A2a	A2a_Radioligand_127	Radioligand	K4DD_db	K4DD_db	-1	GPCR	NA	1339499	Clc1c(O)ccc(-c2c(-c3ccccc3)nc(N)nn2)c1	9.12415	-6.43696	2.68719	K4DD	Clc1c(O)ccc(-c2c(-c3ccccc3)nc(N)nn2)c1	3.81753	84.92	298.733	84.92	0
A2a	A2a_Radioligand_127	Radioligand	K4DD_db	K4DD_db	-1	GPCR	NA	184427	Oc1ccc(CCNC=2N=C(N)n3nc(-c4occc4)nc3N=2)cc1	9.22828	-6.81823	2.41005	K4DD	Oc1ccc(CCNC=2N=C(N)n3nc(-c4occc4)nc3N=2)cc1	0.793	126.85	337.343	127.39	0
A2a	A2a_Radioligand_127	Radioligand	K4DD_db	K4DD_db	-1	GPCR	NA	18511	NC=1n2nc(-c3occc3)nc2-c2c(n(CCc3ccccc3)nc2)N=1	8.44671	-6.32838	2.11833	K4DD	NC=1n2nc(-c3occc3)nc2-c2c(n(CCc3ccccc3)nc2)N=1	1.102	100.05	345.366	100.06	0
A2a	A2a_Radioligand_127	Radioligand	K4DD_db	K4DD_db	-1	GPCR	NA	227480	O(C)c1ccc(CCCn2ncc3-c4n(C(N)=Nc23)nc(-c2occc2)n4)cc1	8.72841	-6.5682	2.16021	K4DD	O(C)c1ccc(CCCn2ncc3-c4n(C(N)=Nc23)nc(-c2occc2)n4)cc1	1.5	109.28	389.419	109.29	0
A2a	A2a_Radioligand_127	Radioligand	K4DD_db	K4DD_db	-1	GPCR	NA	3000063	N(c1nc(-c2ccccc2)nc2[nH]ccc12)C1CCC(C)CC1	5.70499	-4.25888	1.44612	K4DD	N(c1nc(-c2ccccc2)nc2[nH]ccc12)C1CCC(C)CC1	4.327	53.6	306.413	53.6	0
A2a	A2a_Radioligand_127	Radioligand	K4DD_db	K4DD_db	-1	GPCR	NA	365442	O=C1N(CCC)C(=O)c2[nH]c(C3CCCC3)nc2N1CCC	6.82334	-4.70757	2.11577	K4DD	O=C1N(CCC)C(=O)c2[nH]c(C3CCCC3)nc2N1CCC	2.318	69.3	304.394	72.68	0
A2a	A2a_Radioligand_127	Radioligand	K4DD_db	K4DD_db	-1	GPCR	NA	442361	O=C(NCCN)COc1ccc(-c2[nH]c3C(=O)N(CCC)C(=O)N(CCC)c3n2)cc1	7.99446	-5.41442	2.58004	K4DD	O=C(NCCN)COc1ccc(-c2[nH]c3C(=O)N(CCC)C(=O)N(CCC)c3n2)cc1	0.912	133.65	428.493	137.03	0
A2a	A2a_Radioligand_127	Radioligand	K4DD_db	K4DD_db	-1	GPCR	NA	76666	O=C1N(CCC)C(=O)c2nc(C34C5CC(C3)CC(C4)C5)[nH]c2N1CCC	7.46137	-5.68797	1.7734	K4DD	O=C1N(CCC)C(=O)c2nc(C34C5CC(C3)CC(C4)C5)[nH]c2N1CCC	2.76	69.3	356.47	72.68	3
A1a	A1a_SPR_197	SPR	K4DD_db	K4DD_db	-1	GPCR	NA	1339499	Clc1c(O)ccc(-c2c(-c3ccccc3)nc(N)nn2)c1	9.27474	-5.31848	3.95624	K4DD	Clc1c(O)ccc(-c2c(-c3ccccc3)nc(N)nn2)c1	3.81753	84.92	298.733	84.92	0
A1a	A1a_SPR_197	SPR	K4DD_db	K4DD_db	-1	GPCR	NA	18409	Clc1cc2-c3n(C(N)=Nc2cc1)nc(-c1occc1)n3	7.12274	-5.31827	1.80438	K4DD	Clc1cc2-c3n(C(N)=Nc2cc1)nc(-c1occc1)n3	1.474	82.23	285.694	82.24	0
A1a	A1a_SPR_197	SPR	K4DD_db	K4DD_db	-1	GPCR	NA	184427	Oc1ccc(CCNC=2N=C(N)n3nc(-c4occc4)nc3N=2)cc1	6.61013	-5.53504	1.07505	K4DD	Oc1ccc(CCNC=2N=C(N)n3nc(-c4occc4)nc3N=2)cc1	0.793	126.85	337.343	127.39	0
A1a	A1a_SPR_197	SPR	K4DD_db	K4DD_db	-1	GPCR	NA	18536	O=C(Nc1ccc(C#N)cc1)COc1ccc(-c2[nH]c3N(CCC)C(=O)N(CCC)C(=O)c3n2)cc1	7.59455	-5.13513	2.45942	K4DD	O=C(Nc1ccc(C#N)cc1)COc1ccc(-c2[nH]c3N(CCC)C(=O)N(CCC)C(=O)c3n2)cc1	3.142	131.42	486.532	134.8
A1a	A1a_SPR_197	SPR	K4DD_db	K4DD_db	-1	GPCR	NA	202024	S(Cc1[nH]ccn1)c1c(C#N)c(c(C#N)c(N)n1)-c1ccccc1	6.51435	-6.1398	0.293572	K4DD	S(Cc1[nH]ccn1)c1c(C#N)c(c(C#N)c(N)n1)-c1ccccc1	2.069	115.17	332.391	115.17	0
A1a	A1a_SPR_197	SPR	K4DD_db	K4DD_db	-1	GPCR	NA	3000063	N(c1nc(-c2ccccc2)nc2[nH]ccc12)C1CCC(C)CC1	8.02678	-5.17869	2.84802	K4DD	N(c1nc(-c2ccccc2)nc2[nH]ccc12)C1CCC(C)CC1	4.327	53.6	306.413	53.6	0
A1a	A1a_SPR_197	SPR	K4DD_db	K4DD_db	-1	GPCR	NA	365442	O=C1N(CCC)C(=O)c2[nH]c(C3CCCC3)nc2N1CCC	8.56799	-5.53895	3.0291	K4DD	O=C1N(CCC)C(=O)c2[nH]c(C3CCCC3)nc2N1CCC	2.318	69.3	304.394	72.68	0
A1a	A1a_SPR_197	SPR	K4DD_db	K4DD_db	-1	GPCR	NA	442361	O=C(NCCN)COc1ccc(-c2[nH]c3C(=O)N(CCC)C(=O)N(CCC)c3n2)cc1	7.8332	-5.85049	1.86358	K4DD	O=C(NCCN)COc1ccc(-c2[nH]c3C(=O)N(CCC)C(=O)N(CCC)c3n2)cc1	0.912	133.65	428.493	137.03	0
A1a	A1a_SPR_197	SPR	K4DD_db	K4DD_db	-1	GPCR	NA	740558	O=C1N(CCCC)C(=O)c2[nH]c(C34C5CC(C3)CC(C4)C5)nc2N1CCCO	9.19314	-5.233	3.96019	K4DD	O=C1N(CCCC)C(=O)c2[nH]c(C34C5CC(C3)CC(C4)C5)nc2N1CCCO	1.995	89.53	386.496	92.91	0
A1a	A1a_SPR_197	SPR	K4DD_db	K4DD_db	-1	GPCR	NA	76666	O=C1N(CCC)C(=O)c2nc(C34C5CC(C3)CC(C4)C5)[nH]c2N1CCC	7.94386	-4.55811	3.38574	K4DD	O=C1N(CCC)C(=O)c2nc(C34C5CC(C3)CC(C4)C5)[nH]c2N1CCC	2.76	69.3	356.47	72.68	3
A2a	A2a_SPR_128	SPR	K4DD_db	K4DD_db	-1	GPCR	NA	1339499	Clc1c(O)ccc(-c2c(-c3ccccc3)nc(N)nn2)c1	9.74382	-5.93769	3.81439	K4DD	Clc1c(O)ccc(-c2c(-c3ccccc3)nc(N)nn2)c1	3.81753	84.92	298.733	84.92	0
A2a	A2a_SPR_128	SPR	K4DD_db	K4DD_db	-1	GPCR	NA	18409	Clc1cc2-c3n(C(N)=Nc2cc1)nc(-c1occc1)n3	8.48919	-5.56844	2.92082	K4DD	Clc1cc2-c3n(C(N)=Nc2cc1)nc(-c1occc1)n3	1.474	82.23	285.694	82.24	0
A2a	A2a_SPR_128	SPR	K4DD_db	K4DD_db	-1	GPCR	NA	184427	Oc1ccc(CCNC=2N=C(N)n3nc(-c4occc4)nc3N=2)cc1	9.46331	-6.2349	3.21858	K4DD	Oc1ccc(CCNC=2N=C(N)n3nc(-c4occc4)nc3N=2)cc1	0.793	126.85	337.343	127.39	0
A2a	A2a_SPR_128	SPR	K4DD_db	K4DD_db	-1	GPCR	NA	18511	NC=1n2nc(-c3occc3)nc2-c2c(n(CCc3ccccc3)nc2)N=1	8.18602	-6.54761	1.645	K4DD	NC=1n2nc(-c3occc3)nc2-c2c(n(CCc3ccccc3)nc2)N=1	1.102	100.05	345.366	100.06	0
A2a	A2a_SPR_128	SPR	K4DD_db	K4DD_db	-1	GPCR	NA	18536	O=C(Nc1ccc(C#N)cc1)COc1ccc(-c2[nH]c3N(CCC)C(=O)N(CCC)C(=O)c3n2)cc1	7.25469	-5.30255	1.95234	K4DD	O=C(Nc1ccc(C#N)cc1)COc1ccc(-c2[nH]c3N(CCC)C(=O)N(CCC)C(=O)c3n2)cc1	3.142	131.42	486.532	134.8
A2a	A2a_SPR_128	SPR	K4DD_db	K4DD_db	-1	GPCR	NA	202024	S(Cc1[nH]ccn1)c1c(C#N)c(c(C#N)c(N)n1)-c1ccccc1	7.97001	-6.31281	1.62115	K4DD	S(Cc1[nH]ccn1)c1c(C#N)c(c(C#N)c(N)n1)-c1ccccc1	2.069	115.17	332.391	115.17	0
A2a	A2a_SPR_128	SPR	K4DD_db	K4DD_db	-1	GPCR	NA	227480	O(C)c1ccc(CCCn2ncc3-c4n(C(N)=Nc23)nc(-c2occc2)n4)cc1	8.33164	-5.89942	2.47526	K4DD	O(C)c1ccc(CCCn2ncc3-c4n(C(N)=Nc23)nc(-c2occc2)n4)cc1	1.5	109.28	389.419	109.29	0
A2a	A2a_SPR_128	SPR	K4DD_db	K4DD_db	-1	GPCR	NA	3000232	N(CCN1CCC(c2ccccc2)CC1)C=1N=C(N)n2nc(-c3occc3)nc2N=1	8.3439	-6.70243	1.64207	K4DD	N(CCN1CCC(c2ccccc2)CC1)C=1N=C(N)n2nc(-c3occc3)nc2N=1	1.367	109.86	404.478	110.4	0
A2a	A2a_SPR_128	SPR	K4DD_db	K4DD_db	-1	GPCR	NA	3000233	N(CCN1CCN(C)CC1)C=1N=C(N)n2nc(-c3occc3)nc2N=1	7.46471	-5.86806	1.59688	K4DD	N(CCN1CCN(C)CC1)C=1N=C(N)n2nc(-c3occc3)nc2N=1	-1.373	113.1	343.395	113.64	0
A2a	A2a_SPR_128	SPR	K4DD_db	K4DD_db	-1	GPCR	NA	309389	N(CCCN1CCN(c2ccccc2)CC1)C=1N=C(N)n2nc(-c3occc3)nc2N=1	8.01144	-5.95424	2.057	K4DD	N(CCCN1CCN(c2ccccc2)CC1)C=1N=C(N)n2nc(-c3occc3)nc2N=1	0.723	113.1	419.493	113.64	0
A2a	A2a_SPR_128	SPR	K4DD_db	K4DD_db	-1	GPCR	NA	309425	Fc1c(N2CCN(CCNC=3N=C(N)n4nc(-c5occc5)nc4N=3)CC2)ccc(F)c1	9.56703	-5.43775	4.1296	K4DD	Fc1c(N2CCN(CCNC=3N=C(N)n4nc(-c5occc5)nc4N=3)CC2)ccc(F)c1	0.622	113.1	441.446	113.64	0
A2a	A2a_SPR_128	SPR	K4DD_db	K4DD_db	-1	GPCR	NA	365442	O=C1N(CCC)C(=O)c2[nH]c(C3CCCC3)nc2N1CCC	7.11753	-5.68386	1.45792	K4DD	O=C1N(CCC)C(=O)c2[nH]c(C3CCCC3)nc2N1CCC	2.318	69.3	304.394	72.68	0
A2a	A2a_SPR_128	SPR	K4DD_db	K4DD_db	-1	GPCR	NA	442361	O=C(NCCN)COc1ccc(-c2[nH]c3C(=O)N(CCC)C(=O)N(CCC)c3n2)cc1	7.11753	-5.68386	1.45792	K4DD	O=C(NCCN)COc1ccc(-c2[nH]c3C(=O)N(CCC)C(=O)N(CCC)c3n2)cc1	0.912	133.65	428.493	137.03	0
A2a	A2a_SPR_128	SPR	K4DD_db	K4DD_db	-1	GPCR	NA	740558	O=C1N(CCCC)C(=O)c2[nH]c(C34C5CC(C3)CC(C4)C5)nc2N1CCCO	8.61137	-5.78061	2.83091	K4DD	O=C1N(CCCC)C(=O)c2[nH]c(C34C5CC(C3)CC(C4)C5)nc2N1CCCO	1.995	89.53	386.496	92.91	0
A2a	A2a_SPR_128	SPR	K4DD_db	K4DD_db	-1	GPCR	NA	76666	O=C1N(CCC)C(=O)c2nc(C34C5CC(C3)CC(C4)C5)[nH]c2N1CCC	7.45823	-5.65495	1.8183	K4DD	O=C1N(CCC)C(=O)c2nc(C34C5CC(C3)CC(C4)C5)[nH]c2N1CCC	2.76	69.3	356.47	72.68	3
A2a	A2a_SPR_130	SPR	K4DD_db	K4DD_db	-1	GPCR	NA	1339499	Clc1c(O)ccc(-c2c(-c3ccccc3)nc(N)nn2)c1	10.3917	-7.08244	3.24015	K4DD	Clc1c(O)ccc(-c2c(-c3ccccc3)nc(N)nn2)c1	3.81753	84.92	298.733	84.92	0
A2a	A2a_SPR_130	SPR	K4DD_db	K4DD_db	-1	GPCR	NA	184427	Oc1ccc(CCNC=2N=C(N)n3nc(-c4occc4)nc3N=2)cc1	9.48896	-6.47222	3.12225	K4DD	Oc1ccc(CCNC=2N=C(N)n3nc(-c4occc4)nc3N=2)cc1	0.793	126.85	337.343	127.39	0
A2a	A2a_SPR_130	SPR	K4DD_db	K4DD_db	-1	GPCR	NA	18511	NC=1n2nc(-c3occc3)nc2-c2c(n(CCc3ccccc3)nc2)N=1	8.39559	-6.56204	2.05011	K4DD	NC=1n2nc(-c3occc3)nc2-c2c(n(CCc3ccccc3)nc2)N=1	1.102	100.05	345.366	100.06	0
A2a	A2a_SPR_130	SPR	K4DD_db	K4DD_db	-1	GPCR	NA	227480	O(C)c1ccc(CCCn2ncc3-c4n(C(N)=Nc23)nc(-c2occc2)n4)cc1	8.70856	-5.86106	2.87954	K4DD	O(C)c1ccc(CCCn2ncc3-c4n(C(N)=Nc23)nc(-c2occc2)n4)cc1	1.5	109.28	389.419	109.29	0
A2a	A2a_SPR_130	SPR	K4DD_db	K4DD_db	-1	GPCR	NA	365442	O=C1N(CCC)C(=O)c2[nH]c(C3CCCC3)nc2N1CCC	6.9729	-5.65463	1.35193	K4DD	O=C1N(CCC)C(=O)c2[nH]c(C3CCCC3)nc2N1CCC	2.318	69.3	304.394	72.68	0
A2a	A2a_SPR_130	SPR	K4DD_db	K4DD_db	-1	GPCR	NA	442361	O=C(NCCN)COc1ccc(-c2[nH]c3C(=O)N(CCC)C(=O)N(CCC)c3n2)cc1	7.73377	-5.96188	1.78252	K4DD	O=C(NCCN)COc1ccc(-c2[nH]c3C(=O)N(CCC)C(=O)N(CCC)c3n2)cc1	0.912	133.65	428.493	137.03	0
A2a	A2a_SPR_130	SPR	K4DD_db	K4DD_db	-1	GPCR	NA	76666	O=C1N(CCC)C(=O)c2nc(C34C5CC(C3)CC(C4)C5)[nH]c2N1CCC	6.88224	-5.34443	1.61612	K4DD	O=C1N(CCC)C(=O)c2nc(C34C5CC(C3)CC(C4)C5)[nH]c2N1CCC	2.76	69.3	356.47	72.68	3
A2a	A2a_SPR_145	SPR	K4DD_db	K4DD_db	-1	GPCR	NA	184427	Oc1ccc(CCNC=2N=C(N)n3nc(-c4occc4)nc3N=2)cc1	8.89963	-6.63548	2.29328	K4DD	Oc1ccc(CCNC=2N=C(N)n3nc(-c4occc4)nc3N=2)cc1	0.793	126.85	337.343	127.39	0
A2a	A2a_SPR_145	SPR	K4DD_db	K4DD_db	-1	GPCR	NA	18511	NC=1n2nc(-c3occc3)nc2-c2c(n(CCc3ccccc3)nc2)N=1	7.77469	-6.17026	1.67572	K4DD	NC=1n2nc(-c3occc3)nc2-c2c(n(CCc3ccccc3)nc2)N=1	1.102	100.05	345.366	100.06	0
A2a	A2a_SPR_145	SPR	K4DD_db	K4DD_db	-1	GPCR	NA	3000133	O=C(NCCN)COc1ccc(-c2[nH]c3C(=O)N(CC)C(=O)N(CCC)c3n2)cc1	7.77469	-5.98588	1.83863	K4DD	O=C(NCCN)COc1ccc(-c2[nH]c3C(=O)N(CC)C(=O)N(CCC)c3n2)cc1	0.298	133.65	414.466	137.03	0
A2a	A2a_SPR_151	SPR	K4DD_db	K4DD_db	-1	GPCR	NA	184427	Oc1ccc(CCNC=2N=C(N)n3nc(-c4occc4)nc3N=2)cc1	9.62648	-7.43457	2.21762	K4DD	Oc1ccc(CCNC=2N=C(N)n3nc(-c4occc4)nc3N=2)cc1	0.793	126.85	337.343	127.39	0
A2a	A2a_SPR_151	SPR	K4DD_db	K4DD_db	-1	GPCR	NA	18511	NC=1n2nc(-c3occc3)nc2-c2c(n(CCc3ccccc3)nc2)N=1	8.47625	-6.05538	2.43459	K4DD	NC=1n2nc(-c3occc3)nc2-c2c(n(CCc3ccccc3)nc2)N=1	1.102	100.05	345.366	100.06	0
A2a	A2a_SPR_151	SPR	K4DD_db	K4DD_db	-1	GPCR	NA	3000133	O=C(NCCN)COc1ccc(-c2[nH]c3C(=O)N(CC)C(=O)N(CCC)c3n2)cc1	8.12436	-6.44922	1.69996	K4DD	O=C(NCCN)COc1ccc(-c2[nH]c3C(=O)N(CC)C(=O)N(CCC)c3n2)cc1	0.298	133.65	414.466	137.03	0
A2a	A2a_SPR_152	SPR	K4DD_db	K4DD_db	-1	GPCR	NA	184427	Oc1ccc(CCNC=2N=C(N)n3nc(-c4occc4)nc3N=2)cc1	9.68613	-7.2474	2.48373	K4DD	Oc1ccc(CCNC=2N=C(N)n3nc(-c4occc4)nc3N=2)cc1	0.793	126.85	337.343	127.39	0
A2a	A2a_SPR_152	SPR	K4DD_db	K4DD_db	-1	GPCR	NA	18511	NC=1n2nc(-c3occc3)nc2-c2c(n(CCc3ccccc3)nc2)N=1	8.7048	-6.32428	2.38591	K4DD	NC=1n2nc(-c3occc3)nc2-c2c(n(CCc3ccccc3)nc2)N=1	1.102	100.05	345.366	100.06	0
A2a	A2a_SPR_152	SPR	K4DD_db	K4DD_db	-1	GPCR	NA	3000133	O=C(NCCN)COc1ccc(-c2[nH]c3C(=O)N(CC)C(=O)N(CCC)c3n2)cc1	7.93343	-6.34044	1.56976	K4DD	O=C(NCCN)COc1ccc(-c2[nH]c3C(=O)N(CC)C(=O)N(CCC)c3n2)cc1	0.298	133.65	414.466	137.03	0
A2a	A2a_SPR_189	SPR	K4DD_db	K4DD_db	-1	GPCR	NA	184427	Oc1ccc(CCNC=2N=C(N)n3nc(-c4occc4)nc3N=2)cc1	9.4603	-5.89889	3.56146	K4DD	Oc1ccc(CCNC=2N=C(N)n3nc(-c4occc4)nc3N=2)cc1	0.793	126.85	337.343	127.39	0
A2a	A2a_SPR_189	SPR	K4DD_db	K4DD_db	-1	GPCR	NA	3000232	N(CCN1CCC(c2ccccc2)CC1)C=1N=C(N)n2nc(-c3occc3)nc2N=1	8.11748	-5.82672	2.29073	K4DD	N(CCN1CCC(c2ccccc2)CC1)C=1N=C(N)n2nc(-c3occc3)nc2N=1	1.367	109.86	404.478	110.4	0
A2a	A2a_SPR_189	SPR	K4DD_db	K4DD_db	-1	GPCR	NA	3000233	N(CCN1CCN(C)CC1)C=1N=C(N)n2nc(-c3occc3)nc2N=1	7.73874	-5.74507	1.99439	K4DD	N(CCN1CCN(C)CC1)C=1N=C(N)n2nc(-c3occc3)nc2N=1	-1.373	113.1	343.395	113.64	0
A2a	A2a_SPR_189	SPR	K4DD_db	K4DD_db	-1	GPCR	NA	309389	N(CCCN1CCN(c2ccccc2)CC1)C=1N=C(N)n2nc(-c3occc3)nc2N=1	8.23807	-6.02938	2.20971	K4DD	N(CCCN1CCN(c2ccccc2)CC1)C=1N=C(N)n2nc(-c3occc3)nc2N=1	0.723	113.1	419.493	113.64	0
A2a	A2a_SPR_189	SPR	K4DD_db	K4DD_db	-1	GPCR	NA	309425	Fc1c(N2CCN(CCNC=3N=C(N)n4nc(-c5occc5)nc4N=3)CC2)ccc(F)c1	9.27737	-4.92065	4.35754	K4DD	Fc1c(N2CCN(CCNC=3N=C(N)n4nc(-c5occc5)nc4N=3)CC2)ccc(F)c1	0.622	113.1	441.446	113.64	0
A2a	A2a_SPR_190	SPR	K4DD_db	K4DD_db	-1	GPCR	NA	184427	Oc1ccc(CCNC=2N=C(N)n3nc(-c4occc4)nc3N=2)cc1	9.22048	-6.57461	2.64589	K4DD	Oc1ccc(CCNC=2N=C(N)n3nc(-c4occc4)nc3N=2)cc1	0.793	126.85	337.343	127.39	0
A2a	A2a_SPR_190	SPR	K4DD_db	K4DD_db	-1	GPCR	NA	3000232	N(CCN1CCC(c2ccccc2)CC1)C=1N=C(N)n2nc(-c3occc3)nc2N=1	8.08513	-6.39093	1.69465	K4DD	N(CCN1CCC(c2ccccc2)CC1)C=1N=C(N)n2nc(-c3occc3)nc2N=1	1.367	109.86	404.478	110.4	0
A2a	A2a_SPR_190	SPR	K4DD_db	K4DD_db	-1	GPCR	NA	3000233	N(CCN1CCN(C)CC1)C=1N=C(N)n2nc(-c3occc3)nc2N=1	7.284	-5.79099	1.4935	K4DD	N(CCN1CCN(C)CC1)C=1N=C(N)n2nc(-c3occc3)nc2N=1	-1.373	113.1	343.395	113.64	0
A2a	A2a_SPR_190	SPR	K4DD_db	K4DD_db	-1	GPCR	NA	309389	N(CCCN1CCN(c2ccccc2)CC1)C=1N=C(N)n2nc(-c3occc3)nc2N=1	8.08513	-6.39093	1.69465	K4DD	N(CCCN1CCN(c2ccccc2)CC1)C=1N=C(N)n2nc(-c3occc3)nc2N=1	0.723	113.1	419.493	113.64	0
A2a	A2a_SPR_190	SPR	K4DD_db	K4DD_db	-1	GPCR	NA	309425	Fc1c(N2CCN(CCNC=3N=C(N)n4nc(-c5occc5)nc4N=3)CC2)ccc(F)c1	9.41907	-5.617	3.80134	K4DD	Fc1c(N2CCN(CCNC=3N=C(N)n4nc(-c5occc5)nc4N=3)CC2)ccc(F)c1	0.622	113.1	441.446	113.64	0
A2a	A2a_SPR_191	SPR	K4DD_db	K4DD_db	-1	GPCR	NA	184427	Oc1ccc(CCNC=2N=C(N)n3nc(-c4occc4)nc3N=2)cc1	8.9108	-6.97165	1.9393	K4DD	Oc1ccc(CCNC=2N=C(N)n3nc(-c4occc4)nc3N=2)cc1	0.793	126.85	337.343	127.39	0
A2a	A2a_SPR_191	SPR	K4DD_db	K4DD_db	-1	GPCR	NA	3000232	N(CCN1CCC(c2ccccc2)CC1)C=1N=C(N)n2nc(-c3occc3)nc2N=1	7.9393	-6.33846	1.60033	K4DD	N(CCN1CCC(c2ccccc2)CC1)C=1N=C(N)n2nc(-c3occc3)nc2N=1	1.367	109.86	404.478	110.4	0
A2a	A2a_SPR_191	SPR	K4DD_db	K4DD_db	-1	GPCR	NA	3000233	N(CCN1CCN(C)CC1)C=1N=C(N)n2nc(-c3occc3)nc2N=1	7.00261	-5.92117	1.08145	K4DD	N(CCN1CCN(C)CC1)C=1N=C(N)n2nc(-c3occc3)nc2N=1	-1.373	113.1	343.395	113.64	0
A2a	A2a_SPR_191	SPR	K4DD_db	K4DD_db	-1	GPCR	NA	309389	N(CCCN1CCN(c2ccccc2)CC1)C=1N=C(N)n2nc(-c3occc3)nc2N=1	7.88606	-6.17898	1.70774	K4DD	N(CCCN1CCN(c2ccccc2)CC1)C=1N=C(N)n2nc(-c3occc3)nc2N=1	0.723	113.1	419.493	113.64	0
A2a	A2a_SPR_191	SPR	K4DD_db	K4DD_db	-1	GPCR	NA	309425	Fc1c(N2CCN(CCNC=3N=C(N)n4nc(-c5occc5)nc4N=3)CC2)ccc(F)c1	9.16813	-5.79379	3.37469	K4DD	Fc1c(N2CCN(CCNC=3N=C(N)n4nc(-c5occc5)nc4N=3)CC2)ccc(F)c1	0.622	113.1	441.446	113.64	0
A2a	A2a_SPR_192	SPR	K4DD_db	K4DD_db	-1	GPCR	NA	184427	Oc1ccc(CCNC=2N=C(N)n3nc(-c4occc4)nc3N=2)cc1	8.57955	-6.87731	1.70224	K4DD	Oc1ccc(CCNC=2N=C(N)n3nc(-c4occc4)nc3N=2)cc1	0.793	126.85	337.343	127.39	0
A2a	A2a_SPR_192	SPR	K4DD_db	K4DD_db	-1	GPCR	NA	3000232	N(CCN1CCC(c2ccccc2)CC1)C=1N=C(N)n2nc(-c3occc3)nc2N=1	7.65956	-6.79099	0.857454	K4DD	N(CCN1CCC(c2ccccc2)CC1)C=1N=C(N)n2nc(-c3occc3)nc2N=1	1.367	109.86	404.478	110.4	0
A2a	A2a_SPR_192	SPR	K4DD_db	K4DD_db	-1	GPCR	NA	3000233	N(CCN1CCN(C)CC1)C=1N=C(N)n2nc(-c3occc3)nc2N=1	6.8962	-5.74741	1.14935	K4DD	N(CCN1CCN(C)CC1)C=1N=C(N)n2nc(-c3occc3)nc2N=1	-1.373	113.1	343.395	113.64	0
A2a	A2a_SPR_192	SPR	K4DD_db	K4DD_db	-1	GPCR	NA	309389	N(CCCN1CCN(c2ccccc2)CC1)C=1N=C(N)n2nc(-c3occc3)nc2N=1	7.66354	-6.67943	0.982967	K4DD	N(CCCN1CCN(c2ccccc2)CC1)C=1N=C(N)n2nc(-c3occc3)nc2N=1	0.723	113.1	419.493	113.64	0
A2a	A2a_SPR_192	SPR	K4DD_db	K4DD_db	-1	GPCR	NA	309425	Fc1c(N2CCN(CCNC=3N=C(N)n4nc(-c5occc5)nc4N=3)CC2)ccc(F)c1	9.40782	-6.91009	2.49757	K4DD	Fc1c(N2CCN(CCNC=3N=C(N)n4nc(-c5occc5)nc4N=3)CC2)ccc(F)c1	0.622	113.1	441.446	113.64	0
A2a	A2a_SPR_193	SPR	K4DD_db	K4DD_db	-1	GPCR	NA	184427	Oc1ccc(CCNC=2N=C(N)n3nc(-c4occc4)nc3N=2)cc1	8.39859	-7.33866	1.05988	K4DD	Oc1ccc(CCNC=2N=C(N)n3nc(-c4occc4)nc3N=2)cc1	0.793	126.85	337.343	127.39	0
A2a	A2a_SPR_193	SPR	K4DD_db	K4DD_db	-1	GPCR	NA	3000232	N(CCN1CCC(c2ccccc2)CC1)C=1N=C(N)n2nc(-c3occc3)nc2N=1	7.54975	-6.38021	1.16813	K4DD	N(CCN1CCC(c2ccccc2)CC1)C=1N=C(N)n2nc(-c3occc3)nc2N=1	1.367	109.86	404.478	110.4	0
A2a	A2a_SPR_193	SPR	K4DD_db	K4DD_db	-1	GPCR	NA	3000233	N(CCN1CCN(C)CC1)C=1N=C(N)n2nc(-c3occc3)nc2N=1	6.62709	-6.11394	0.512862	K4DD	N(CCN1CCN(C)CC1)C=1N=C(N)n2nc(-c3occc3)nc2N=1	-1.373	113.1	343.395	113.64	0
A2a	A2a_SPR_193	SPR	K4DD_db	K4DD_db	-1	GPCR	NA	309389	N(CCCN1CCN(c2ccccc2)CC1)C=1N=C(N)n2nc(-c3occc3)nc2N=1	7.45717	-6.1959	1.26201	K4DD	N(CCCN1CCN(c2ccccc2)CC1)C=1N=C(N)n2nc(-c3occc3)nc2N=1	0.723	113.1	419.493	113.64	0
A2a	A2a_SPR_193	SPR	K4DD_db	K4DD_db	-1	GPCR	NA	309425	Fc1c(N2CCN(CCNC=3N=C(N)n4nc(-c5occc5)nc4N=3)CC2)ccc(F)c1	8.78516	-6.3927	2.39255	K4DD	Fc1c(N2CCN(CCNC=3N=C(N)n4nc(-c5occc5)nc4N=3)CC2)ccc(F)c1	0.622	113.1	441.446	113.64	0
A2a	A2a_SPR_194	SPR	K4DD_db	K4DD_db	-1	GPCR	NA	184427	Oc1ccc(CCNC=2N=C(N)n3nc(-c4occc4)nc3N=2)cc1	7.98801	-7.33945	0.648397	K4DD	Oc1ccc(CCNC=2N=C(N)n3nc(-c4occc4)nc3N=2)cc1	0.793	126.85	337.343	127.39	0
A2a	A2a_SPR_194	SPR	K4DD_db	K4DD_db	-1	GPCR	NA	3000232	N(CCN1CCC(c2ccccc2)CC1)C=1N=C(N)n2nc(-c3occc3)nc2N=1	7.34582	-6.63246	0.714443	K4DD	N(CCN1CCC(c2ccccc2)CC1)C=1N=C(N)n2nc(-c3occc3)nc2N=1	1.367	109.86	404.478	110.4	0
A2a	A2a_SPR_194	SPR	K4DD_db	K4DD_db	-1	GPCR	NA	3000233	N(CCN1CCN(C)CC1)C=1N=C(N)n2nc(-c3occc3)nc2N=1	6.41005	-6.17898	0.229885	K4DD	N(CCN1CCN(C)CC1)C=1N=C(N)n2nc(-c3occc3)nc2N=1	-1.373	113.1	343.395	113.64	0
A2a	A2a_SPR_194	SPR	K4DD_db	K4DD_db	-1	GPCR	NA	309389	N(CCCN1CCN(c2ccccc2)CC1)C=1N=C(N)n2nc(-c3occc3)nc2N=1	7.27984	-6.54777	0.732828	K4DD	N(CCCN1CCN(c2ccccc2)CC1)C=1N=C(N)n2nc(-c3occc3)nc2N=1	0.723	113.1	419.493	113.64	0
A2a	A2a_SPR_194	SPR	K4DD_db	K4DD_db	-1	GPCR	NA	309425	Fc1c(N2CCN(CCNC=3N=C(N)n4nc(-c5occc5)nc4N=3)CC2)ccc(F)c1	8.43297	-5.93298	2.50031	K4DD	Fc1c(N2CCN(CCNC=3N=C(N)n4nc(-c5occc5)nc4N=3)CC2)ccc(F)c1	0.622	113.1	441.446	113.64	0
AurA	AuroraA_SPR_131	SPR	K4DD_db	K4DD_db	-1	Kinase	NA	317507	S(=O)(=O)(N)c1ccc(Nc2nn(C(=O)c3c(F)cccc3F)c(N)n2)cc1	7.47886	-6.40762	1.07123	K4DD	S(=O)(=O)(N)c1ccc(Nc2nn(C(=O)c3c(F)cccc3F)c(N)n2)cc1	0.89	145.99	394.362	145.99	0
AurA	AuroraA_SPR_131	SPR	K4DD_db	K4DD_db	-1	Kinase	NA	321594	O=C(Nc1c(CC)cccc1CC)N1Cc2c(NC(=O)c3ccc(N4CCN(C)CC4)cc3)n[nH]c2C1	8.58281	-6.12958	2.43597	K4DD	O=C(Nc1c(CC)cccc1CC)N1Cc2c(NC(=O)c3ccc(N4CCN(C)CC4)cc3)n[nH]c2C1	3.374	96.6	501.635	96.6	0
AurA	AuroraA_SPR_131	SPR	K4DD_db	K4DD_db	-1	Kinase	NA	341892	O=C(Nc1ccc(Nc2ncnc3c2cc(OC)c(OCCCN2CCOCC2)c3)cc1)c1ccccc1	6.85886	-6.39551	0.7716	K4DD	O=C(Nc1ccc(Nc2ncnc3c2cc(OC)c(OCCCN2CCOCC2)c3)cc1)c1ccccc1	3.32274	97.84	513.598	97.84	0
AurA	AuroraA_SPR_131	SPR	K4DD_db	K4DD_db	-1	Kinase	NA	363083	Fc1cc(NC(=O)Cc2[nH]nc(Nc3ncnc4c3ccc(OCCCN(CCO)CC)c4)c2)ccc1	6.93679	-6.23333	0.702094	K4DD	Fc1cc(NC(=O)Cc2[nH]nc(Nc3ncnc4c3ccc(OCCCN(CCO)CC)c4)c2)ccc1	2.773	128.29	507.57	128.29	0
AurA	AuroraA_SPR_131	SPR	K4DD_db	K4DD_db	-1	Kinase	NA	428508	Clc1cc2C(c3c(F)cccc3F)=NCc3c(nc(Nc4ccc(C(=O)O)cc4)nc3)-c2cc1	9.46009	-6.34505	3.12985	K4DD	Clc1cc2C(c3c(F)cccc3F)=NCc3c(nc(Nc4ccc(C(=O)O)cc4)nc3)-c2cc1	5.189	87.47	476.87	87.47	0
AurA	AuroraA_SPR_131	SPR	K4DD_db	K4DD_db	-1	Kinase	NA	436277	S(c1nc(Nc2n[nH]c(C)c2)cc(N2CCN(C)CC2)n1)c1ccc(NC(=O)C2CC2)cc1	9.47712	-6.82758	2.67067	K4DD	S(c1nc(Nc2n[nH]c(C)c2)cc(N2CCN(C)CC2)n1)c1ccc(NC(=O)C2CC2)cc1	2.586	102.07	464.598	102.07	2
AurA	AuroraA_SPR_131	SPR	K4DD_db	K4DD_db	-1	Kinase	NA	436278	O=C(C(OC)c1ccccc1)N1Cc2c(NC(=O)c3ccc(N4CCN(C)CC4)cc3)n[nH]c2C1	8.57403	-6.35705	2.25482	K4DD	O=C(C(OC)c1ccccc1)N1Cc2c(NC(=O)c3ccc(N4CCN(C)CC4)cc3)n[nH]c2C1	2.235	93.8	474.565	93.8	0
AurA	AuroraA_SPR_131	SPR	K4DD_db	K4DD_db	-1	Kinase	NA	622556	O=C(N(C)C)Nc1ccc(-c2c(-c3c4c([nH]c(-c5cc(CN(C)C)ccc5)c4)ncc3)cn(CC)n2)cc1	7.82198	-5.5302	2.29062	K4DD	O=C(N(C)C)Nc1ccc(-c2c(-c3c4c([nH]c(-c5cc(CN(C)C)ccc5)c4)ncc3)cn(CC)n2)cc1	4.46	82.08	507.642	82.08	1
AurA	AuroraA_SPR_135	SPR	K4DD_db	K4DD_db	-1	Kinase	NA	317507	S(=O)(=O)(N)c1ccc(Nc2nn(C(=O)c3c(F)cccc3F)c(N)n2)cc1	7.52095	-6.14633	1.35556	K4DD	S(=O)(=O)(N)c1ccc(Nc2nn(C(=O)c3c(F)cccc3F)c(N)n2)cc1	0.89	145.99	394.362	145.99	0
AurA	AuroraA_SPR_135	SPR	K4DD_db	K4DD_db	-1	Kinase	NA	321594	O=C(Nc1c(CC)cccc1CC)N1Cc2c(NC(=O)c3ccc(N4CCN(C)CC4)cc3)n[nH]c2C1	8.73518	-6.21192	2.5301	K4DD	O=C(Nc1c(CC)cccc1CC)N1Cc2c(NC(=O)c3ccc(N4CCN(C)CC4)cc3)n[nH]c2C1	3.374	96.6	501.635	96.6	0
AurA	AuroraA_SPR_135	SPR	K4DD_db	K4DD_db	-1	Kinase	NA	341892	O=C(Nc1ccc(Nc2ncnc3c2cc(OC)c(OCCCN2CCOCC2)c3)cc1)c1ccccc1	7.06533	-6.12088	1.25303	K4DD	O=C(Nc1ccc(Nc2ncnc3c2cc(OC)c(OCCCN2CCOCC2)c3)cc1)c1ccccc1	3.32274	97.84	513.598	97.84	0
AurA	AuroraA_SPR_135	SPR	K4DD_db	K4DD_db	-1	Kinase	NA	363083	Fc1cc(NC(=O)Cc2[nH]nc(Nc3ncnc4c3ccc(OCCCN(CCO)CC)c4)c2)ccc1	6.9594	-6.10163	0.868595	K4DD	Fc1cc(NC(=O)Cc2[nH]nc(Nc3ncnc4c3ccc(OCCCN(CCO)CC)c4)c2)ccc1	2.773	128.29	507.57	128.29	0
AurA	AuroraA_SPR_135	SPR	K4DD_db	K4DD_db	-1	Kinase	NA	428508	Clc1cc2C(c3c(F)cccc3F)=NCc3c(nc(Nc4ccc(C(=O)O)cc4)nc3)-c2cc1	9.03937	-6.15412	1.30178	K4DD	Clc1cc2C(c3c(F)cccc3F)=NCc3c(nc(Nc4ccc(C(=O)O)cc4)nc3)-c2cc1	5.189	87.47	476.87	87.47	0
AurA	AuroraA_SPR_135	SPR	K4DD_db	K4DD_db	-1	Kinase	NA	436277	S(c1nc(Nc2n[nH]c(C)c2)cc(N2CCN(C)CC2)n1)c1ccc(NC(=O)C2CC2)cc1	9.19044	-6.1959	3.00174	K4DD	S(c1nc(Nc2n[nH]c(C)c2)cc(N2CCN(C)CC2)n1)c1ccc(NC(=O)C2CC2)cc1	2.586	102.07	464.598	102.07	2
AurA	AuroraA_SPR_135	SPR	K4DD_db	K4DD_db	-1	Kinase	NA	436278	O=C(C(OC)c1ccccc1)N1Cc2c(NC(=O)c3ccc(N4CCN(C)CC4)cc3)n[nH]c2C1	8.66655	-6.38934	2.26817	K4DD	O=C(C(OC)c1ccccc1)N1Cc2c(NC(=O)c3ccc(N4CCN(C)CC4)cc3)n[nH]c2C1	2.235	93.8	474.565	93.8	0
AurA	AuroraA_SPR_135	SPR	K4DD_db	K4DD_db	-1	Kinase	NA	622556	O=C(N(C)C)Nc1ccc(-c2c(-c3c4c([nH]c(-c5cc(CN(C)C)ccc5)c4)ncc3)cn(CC)n2)cc1	7.97265	-5.60325	2.36942	K4DD	O=C(N(C)C)Nc1ccc(-c2c(-c3c4c([nH]c(-c5cc(CN(C)C)ccc5)c4)ncc3)cn(CC)n2)cc1	4.46	82.08	507.642	82.08	1
AurA	AuroraA_SPR_138	SPR	K4DD_db	K4DD_db	-1	Kinase	NA	317507	S(=O)(=O)(N)c1ccc(Nc2nn(C(=O)c3c(F)cccc3F)c(N)n2)cc1	7.29294	-6.39234	1.12221	K4DD	S(=O)(=O)(N)c1ccc(Nc2nn(C(=O)c3c(F)cccc3F)c(N)n2)cc1	0.89	145.99	394.362	145.99	0
AurA	AuroraA_SPR_138	SPR	K4DD_db	K4DD_db	-1	Kinase	NA	321594	O=C(Nc1c(CC)cccc1CC)N1Cc2c(NC(=O)c3ccc(N4CCN(C)CC4)cc3)n[nH]c2C1	8.45428	-6.37937	2.08483	K4DD	O=C(Nc1c(CC)cccc1CC)N1Cc2c(NC(=O)c3ccc(N4CCN(C)CC4)cc3)n[nH]c2C1	3.374	96.6	501.635	96.6	0
AurA	AuroraA_SPR_138	SPR	K4DD_db	K4DD_db	-1	Kinase	NA	363083	Fc1cc(NC(=O)Cc2[nH]nc(Nc3ncnc4c3ccc(OCCCN(CCO)CC)c4)c2)ccc1	6.78897	-6.24912	0.583803	K4DD	Fc1cc(NC(=O)Cc2[nH]nc(Nc3ncnc4c3ccc(OCCCN(CCO)CC)c4)c2)ccc1	2.773	128.29	507.57	128.29	0
AurA	AuroraA_SPR_138	SPR	K4DD_db	K4DD_db	-1	Kinase	NA	428508	Clc1cc2C(c3c(F)cccc3F)=NCc3c(nc(Nc4ccc(C(=O)O)cc4)nc3)-c2cc1	8.77989	-6.53736	2.23065	K4DD	Clc1cc2C(c3c(F)cccc3F)=NCc3c(nc(Nc4ccc(C(=O)O)cc4)nc3)-c2cc1	5.189	87.47	476.87	87.47	0
AurA	AuroraA_SPR_138	SPR	K4DD_db	K4DD_db	-1	Kinase	NA	436277	S(c1nc(Nc2n[nH]c(C)c2)cc(N2CCN(C)CC2)n1)c1ccc(NC(=O)C2CC2)cc1	8.9101	-6.42846	2.47066	K4DD	S(c1nc(Nc2n[nH]c(C)c2)cc(N2CCN(C)CC2)n1)c1ccc(NC(=O)C2CC2)cc1	2.586	102.07	464.598	102.07	2
AurA	AuroraA_SPR_138	SPR	K4DD_db	K4DD_db	-1	Kinase	NA	436278	O=C(C(OC)c1ccccc1)N1Cc2c(NC(=O)c3ccc(N4CCN(C)CC4)cc3)n[nH]c2C1	8.47023	-6.41375	2.10975	K4DD	O=C(C(OC)c1ccccc1)N1Cc2c(NC(=O)c3ccc(N4CCN(C)CC4)cc3)n[nH]c2C1	2.235	93.8	474.565	93.8	0
AurA	AuroraA_SPR_138	SPR	K4DD_db	K4DD_db	-1	Kinase	NA	622556	O=C(N(C)C)Nc1ccc(-c2c(-c3c4c([nH]c(-c5cc(CN(C)C)ccc5)c4)ncc3)cn(CC)n2)cc1	7.88751	-5.62658	2.26938	K4DD	O=C(N(C)C)Nc1ccc(-c2c(-c3c4c([nH]c(-c5cc(CN(C)C)ccc5)c4)ncc3)cn(CC)n2)cc1	4.46	82.08	507.642	82.08	1
AurA	AuroraA_SPR_139	SPR	K4DD_db	K4DD_db	-1	Kinase	NA	317507	S(=O)(=O)(N)c1ccc(Nc2nn(C(=O)c3c(F)cccc3F)c(N)n2)cc1	7.18566	-6.4639	1.32441	K4DD	S(=O)(=O)(N)c1ccc(Nc2nn(C(=O)c3c(F)cccc3F)c(N)n2)cc1	0.89	145.99	394.362	145.99	0
AurA	AuroraA_SPR_139	SPR	K4DD_db	K4DD_db	-1	Kinase	NA	321594	O=C(Nc1c(CC)cccc1CC)N1Cc2c(NC(=O)c3ccc(N4CCN(C)CC4)cc3)n[nH]c2C1	8.40598	-6.59857	1.83088	K4DD	O=C(Nc1c(CC)cccc1CC)N1Cc2c(NC(=O)c3ccc(N4CCN(C)CC4)cc3)n[nH]c2C1	3.374	96.6	501.635	96.6	0
AurA	AuroraA_SPR_139	SPR	K4DD_db	K4DD_db	-1	Kinase	NA	363083	Fc1cc(NC(=O)Cc2[nH]nc(Nc3ncnc4c3ccc(OCCCN(CCO)CC)c4)c2)ccc1	6.39722	-5.69238	0.733611	K4DD	Fc1cc(NC(=O)Cc2[nH]nc(Nc3ncnc4c3ccc(OCCCN(CCO)CC)c4)c2)ccc1	2.773	128.29	507.57	128.29	0
AurA	AuroraA_SPR_139	SPR	K4DD_db	K4DD_db	-1	Kinase	NA	428508	Clc1cc2C(c3c(F)cccc3F)=NCc3c(nc(Nc4ccc(C(=O)O)cc4)nc3)-c2cc1	8.70407	-6.34223	2.25381	K4DD	Clc1cc2C(c3c(F)cccc3F)=NCc3c(nc(Nc4ccc(C(=O)O)cc4)nc3)-c2cc1	5.189	87.47	476.87	87.47	0
AurA	AuroraA_SPR_139	SPR	K4DD_db	K4DD_db	-1	Kinase	NA	436277	S(c1nc(Nc2n[nH]c(C)c2)cc(N2CCN(C)CC2)n1)c1ccc(NC(=O)C2CC2)cc1	8.88417	-7.30726	2.36974	K4DD	S(c1nc(Nc2n[nH]c(C)c2)cc(N2CCN(C)CC2)n1)c1ccc(NC(=O)C2CC2)cc1	2.586	102.07	464.598	102.07	2
AurA	AuroraA_SPR_139	SPR	K4DD_db	K4DD_db	-1	Kinase	NA	436278	O=C(C(OC)c1ccccc1)N1Cc2c(NC(=O)c3ccc(N4CCN(C)CC4)cc3)n[nH]c2C1	8.42946	-6.37755	2.09168	K4DD	O=C(C(OC)c1ccccc1)N1Cc2c(NC(=O)c3ccc(N4CCN(C)CC4)cc3)n[nH]c2C1	2.235	93.8	474.565	93.8	0
AurA	AuroraA_SPR_139	SPR	K4DD_db	K4DD_db	-1	Kinase	NA	622556	O=C(N(C)C)Nc1ccc(-c2c(-c3c4c([nH]c(-c5cc(CN(C)C)ccc5)c4)ncc3)cn(CC)n2)cc1	7.90998	-5.62995	2.36606	K4DD	O=C(N(C)C)Nc1ccc(-c2c(-c3c4c([nH]c(-c5cc(CN(C)C)ccc5)c4)ncc3)cn(CC)n2)cc1	4.46	82.08	507.642	82.08	1
AurA	AuroraA_SPR_140	SPR	K4DD_db	K4DD_db	-1	Kinase	NA	317507	S(=O)(=O)(N)c1ccc(Nc2nn(C(=O)c3c(F)cccc3F)c(N)n2)cc1	7.01472	-6.1866	1.05347	K4DD	S(=O)(=O)(N)c1ccc(Nc2nn(C(=O)c3c(F)cccc3F)c(N)n2)cc1	0.89	145.99	394.362	145.99	0
AurA	AuroraA_SPR_140	SPR	K4DD_db	K4DD_db	-1	Kinase	NA	321594	O=C(Nc1c(CC)cccc1CC)N1Cc2c(NC(=O)c3ccc(N4CCN(C)CC4)cc3)n[nH]c2C1	8.35556	-6.35766	2.00368	K4DD	O=C(Nc1c(CC)cccc1CC)N1Cc2c(NC(=O)c3ccc(N4CCN(C)CC4)cc3)n[nH]c2C1	3.374	96.6	501.635	96.6	0
AurA	AuroraA_SPR_140	SPR	K4DD_db	K4DD_db	-1	Kinase	NA	363083	Fc1cc(NC(=O)Cc2[nH]nc(Nc3ncnc4c3ccc(OCCCN(CCO)CC)c4)c2)ccc1	6.14146	-5.25503	1.0407	K4DD	Fc1cc(NC(=O)Cc2[nH]nc(Nc3ncnc4c3ccc(OCCCN(CCO)CC)c4)c2)ccc1	2.773	128.29	507.57	128.29	0
AurA	AuroraA_SPR_140	SPR	K4DD_db	K4DD_db	-1	Kinase	NA	428508	Clc1cc2C(c3c(F)cccc3F)=NCc3c(nc(Nc4ccc(C(=O)O)cc4)nc3)-c2cc1	8.48017	-6.58307	2.12154	K4DD	Clc1cc2C(c3c(F)cccc3F)=NCc3c(nc(Nc4ccc(C(=O)O)cc4)nc3)-c2cc1	5.189	87.47	476.87	87.47	0
AurA	AuroraA_SPR_140	SPR	K4DD_db	K4DD_db	-1	Kinase	NA	436277	S(c1nc(Nc2n[nH]c(C)c2)cc(N2CCN(C)CC2)n1)c1ccc(NC(=O)C2CC2)cc1	8.7704	-6.57833	2.00055	K4DD	S(c1nc(Nc2n[nH]c(C)c2)cc(N2CCN(C)CC2)n1)c1ccc(NC(=O)C2CC2)cc1	2.586	102.07	464.598	102.07	2
AurA	AuroraA_SPR_140	SPR	K4DD_db	K4DD_db	-1	Kinase	NA	436278	O=C(C(OC)c1ccccc1)N1Cc2c(NC(=O)c3ccc(N4CCN(C)CC4)cc3)n[nH]c2C1	8.40414	-6.38265	2.04674	K4DD	O=C(C(OC)c1ccccc1)N1Cc2c(NC(=O)c3ccc(N4CCN(C)CC4)cc3)n[nH]c2C1	2.235	93.8	474.565	93.8	0
AurA	AuroraA_SPR_140	SPR	K4DD_db	K4DD_db	-1	Kinase	NA	622556	O=C(N(C)C)Nc1ccc(-c2c(-c3c4c([nH]c(-c5cc(CN(C)C)ccc5)c4)ncc3)cn(CC)n2)cc1	7.92751	-5.64647	2.2913	K4DD	O=C(N(C)C)Nc1ccc(-c2c(-c3c4c([nH]c(-c5cc(CN(C)C)ccc5)c4)ncc3)cn(CC)n2)cc1	4.46	82.08	507.642	82.08	1
AurA	AuroraA_SPR_147	SPR	K4DD_db	K4DD_db	-1	Kinase	NA	1157683	Brc1c(O)c(Br)cc(C=C2C(=O)Nc3c2cc(C(=O)OC)cc3)c1	7.0489	-5.77897	1.27203	K4DD	Brc1c(O)c(Br)cc(C=C2C(=O)Nc3c2cc(C(=O)OC)cc3)c1	4.575	75.63	453.086	75.63	0
AurA	AuroraA_SPR_147	SPR	K4DD_db	K4DD_db	-1	Kinase	NA	1309728	S(c1c(C(=O)NC)cccc1)c1cc2[nH]nc(C=Cc3ncccc3)c2cc1	6.95745	-5.89276	1.0655	K4DD	S(c1c(C(=O)NC)cccc1)c1cc2[nH]nc(C=Cc3ncccc3)c2cc1	4.643	70.67	386.479	70.67	0
AurA	AuroraA_SPR_147	SPR	K4DD_db	K4DD_db	-1	Kinase	NA	1328355	O=C(O)CCc1c(C)c(C=C2C(=O)Nc3c2cccc3)[nH]c1C	7.10292	-6.57171	0.81477	K4DD	O=C(O)CCc1c(C)c(C=C2C(=O)Nc3c2cccc3)[nH]c1C	2.374	82.19	310.353	82.19	0
AurA	AuroraA_SPR_147	SPR	K4DD_db	K4DD_db	-1	Kinase	NA	1377987	Fc1ccc(NC(=O)C2(C(=O)Nc3ccc(Oc4c5c(ncc4)cc(OC)c(OC)c5)cc3)CC2)cc1	5.47326	-4.62921	0.868724	K4DD	Fc1ccc(NC(=O)C2(C(=O)Nc3ccc(Oc4c5c(ncc4)cc(OC)c(OC)c5)cc3)CC2)cc1	4.52074	98.78	501.514	98.78	4
AurA	AuroraA_SPR_147	SPR	K4DD_db	K4DD_db	-1	Kinase	NA	1380093	Clc1cc(F)c(Cc2c(C)nc3C(CN4CCOCC4)=CC(Nc4n[nH]c(C)c4)=Nn23)cc1	7.82242	-5.6972	2.12471	K4DD	Clc1cc(F)c(Cc2c(C)nc3C(CN4CCOCC4)=CC(Nc4n[nH]c(C)c4)=Nn23)cc1	3.368	83.36	469.952	83.37	2
AurA	AuroraA_SPR_147	SPR	K4DD_db	K4DD_db	-1	Kinase	NA	1413816	Clc1c(Nc2n[nH]c(C)c2)nc(NC(C)c2ncc(F)cn2)nc1	4.89394	-3.58013	1.34116	K4DD	Clc1c(Nc2n[nH]c(C)c2)nc(NC(C)c2ncc(F)cn2)nc1	1.111	104.3	348.773	104.3	0
AurA	AuroraA_SPR_147	SPR	K4DD_db	K4DD_db	-1	Kinase	NA	3000126	S(=O)(=O)(CC)c1cc(-c2c3c(c(C)c(C(=O)NC4CCN(C)CC4)c2)[nH]c2ncc(C)cc32)ccc1	7.85339	-5.79911	2.05448	K4DD	S(=O)(=O)(CC)c1cc(-c2c3c(c(C)c(C(=O)NC4CCN(C)CC4)c2)[nH]c2ncc(C)cc32)ccc1	4.722	95.16	504.655	95.16	1
AurA	AuroraA_SPR_147	SPR	K4DD_db	K4DD_db	-1	Kinase	NA	3000127	Clc1c(C(Oc2cc3c(C=Cc4cn(CCO)nc4)n[nH]c3cc2)C)c(Cl)cnc1	7.91044	-5.82114	2.14484	K4DD	Clc1c(C(Oc2cc3c(C=Cc4cn(CCO)nc4)n[nH]c3cc2)C)c(Cl)cnc1	3.804	88.85	444.322	88.85	1
AurA	AuroraA_SPR_147	SPR	K4DD_db	K4DD_db	-1	Kinase	NA	3000128	Brc1c(NCCc2[nH]cnc2)nc(Nc2cc(NC(=O)N3CCCC3)ccc2)nc1	7.86029	-6.50256	1.38746	K4DD	Brc1c(NCCc2[nH]cnc2)nc(Nc2cc(NC(=O)N3CCCC3)ccc2)nc1	1.234	110.86	471.363	110.86	0
AurA	AuroraA_SPR_147	SPR	K4DD_db	K4DD_db	-1	Kinase	NA	3000129	S(=O)(=O)(Cc1ccc(Nc2nc(N(C)c3ccc(NC(=O)Nc4ccc(C(=O)N5CCN(C)CC5)cc4)cc3)ccn2)cc1)C	7.68814	-5.62719	2.08269	K4DD	S(=O)(=O)(Cc1ccc(Nc2nc(N(C)c3ccc(NC(=O)Nc4ccc(C(=O)N5CCN(C)CC5)cc4)cc3)ccn2)cc1)C	2.341	139.87	628.758	139.87	0
AurA	AuroraA_SPR_147	SPR	K4DD_db	K4DD_db	-1	Kinase	NA	3000130	O=C(Nc1cc2[nH]c(-c3cn(C)nc3)c3c2c(C(=O)NN=C3)c1)C(N)C1CCCCC1	7.08633	-6.22384	0.86742	K4DD	O=C(Nc1cc2[nH]c(-c3cn(C)nc3)c3c2c(C(=O)NN=C3)c1)C(N)C1CCCCC1	2.408	130.19	419.489	134.48
AurA	AuroraA_SPR_147	SPR	K4DD_db	K4DD_db	-1	Kinase	NA	3000131	Clc1c(Nc2c(P(=O)(C)C)cccc2)nc(Nc2c(OC)cc(N3CCC(N(C)C)CC3)cc2)nc1	6.4761	-5.43093	1.06083	K4DD	Clc1c(Nc2c(P(=O)(C)C)cccc2)nc(Nc2c(OC)cc(N3CCC(N(C)C)CC3)cc2)nc1	3.006	82.62	529.025	82.62	0
AurA	AuroraA_SPR_147	SPR	K4DD_db	K4DD_db	-1	Kinase	NA	3000132	O=C(Nc1n[nH]c(CCc2cc(OC)cc(OC)c2)c1)c1ccc(N2CC(C)NC(C)C2)cc1	6.41896	-5.99634	0.525881	K4DD	O=C(Nc1n[nH]c(CCc2cc(OC)cc(OC)c2)c1)c1ccc(N2CC(C)NC(C)C2)cc1	3.948	91.51	463.582	91.51	2
AurA	AuroraA_SPR_147	SPR	K4DD_db	K4DD_db	-1	Kinase	NA	314467	S(=O)(=O)(N)c1cc(Nc2nc(N(C)c3ccc(NC(=O)Nc4ccc(OC(F)(F)F)cc4)cc3)ccn2)ccc1	4.90445	-2.89204	2.01309	K4DD	S(=O)(=O)(N)c1cc(Nc2nc(N(C)c3ccc(NC(=O)Nc4ccc(OC(F)(F)F)cc4)cc3)ccn2)ccc1	3.85176	151.57	573.556	151.57	0
AurA	AuroraA_SPR_147	SPR	K4DD_db	K4DD_db	-1	Kinase	NA	426232	S=C(NC(=O)Cc1ccccc1)Nc1cc(F)c(Oc2c3sc(-c4ncn(C)c4)cc3ncc2)cc1	6.89429	-5.83059	1.0653	K4DD	S=C(NC(=O)Cc1ccccc1)Nc1cc(F)c(Oc2c3sc(-c4ncn(C)c4)cc3ncc2)cc1	4.661	113.16	517.609	81.07	0
AurA	AuroraA_SPR_147	SPR	K4DD_db	K4DD_db	-1	Kinase	NA	436278	O=C(C(OC)c1ccccc1)N1Cc2c(NC(=O)c3ccc(N4CCN(C)CC4)cc3)n[nH]c2C1	8.00883	-5.32511	2.68126	K4DD	O=C(C(OC)c1ccccc1)N1Cc2c(NC(=O)c3ccc(N4CCN(C)CC4)cc3)n[nH]c2C1	2.235	93.8	474.565	93.8	0
AurA	AuroraA_SPR_147	SPR	K4DD_db	K4DD_db	-1	Kinase	NA	452650	S(=O)(=O)(N(C)c1c(CNc2c(C(F)(F)F)cnc(Nc3cc4c(NC(=O)C4)cc3)n2)cccc1)C	6.60673	-5.48287	1.16779	K4DD	S(=O)(=O)(N(C)c1c(CNc2c(C(F)(F)F)cnc(Nc3cc4c(NC(=O)C4)cc3)n2)cccc1)C	1.90276	116.32	506.509	116.32	0
AurA	AuroraA_SPR_147	SPR	K4DD_db	K4DD_db	-1	Kinase	NA	460144	Fc1c(Nc2nc3NC(=O)C(C)(C)Oc3cc2)nc(Nc2cc(OC)c(OC)c(OC)c2)nc1	7.52465	-6.07323	1.45387	K4DD	Fc1c(Nc2nc3NC(=O)C(C)(C)Oc3cc2)nc(Nc2cc(OC)c(OC)c(OC)c2)nc1	1.87148	128.75	470.461	128.75	2
AurA	AuroraA_SPR_147	SPR	K4DD_db	K4DD_db	-1	Kinase	NA	489525	S(=O)(=O)(N)c1c(C)ccc(Nc2nc(N(C)c3cc4nn(C)c(C)c4cc3)ccn2)c1	6.01594	-5.24543	0.766919	K4DD	S(=O)(=O)(N)c1c(C)ccc(Nc2nc(N(C)c3cc4nn(C)c(C)c4cc3)ccn2)c1	1.865	119.03	437.528	119.03	4
AurA	AuroraA_SPR_147	SPR	K4DD_db	K4DD_db	-1	Kinase	NA	494066	O=C(Nc1c(-c2[nH]c3c(n2)ccc(CN2CCOCC2)c3)n[nH]c1)NC1CC1	7.3282	-5.57399	1.76363	K4DD	O=C(Nc1c(-c2[nH]c3c(n2)ccc(CN2CCOCC2)c3)n[nH]c1)NC1CC1	1.13706	110.96	381.44	110.96	2
AurA	AuroraA_SPR_147	SPR	K4DD_db	K4DD_db	-1	Kinase	NA	495238	FC(F)(F)c1c(N2CCN(C)CC2)ccc(Nc2nc(-c3c4n(nc3)N=CC=C4)ccn2)c1	4.47782	-3.42569	1.07304	K4DD	FC(F)(F)c1c(N2CCN(C)CC2)ccc(Nc2nc(-c3c4n(nc3)N=CC=C4)ccn2)c1	2.70876	74.47	454.46	74.48	0
AurA	AuroraA_SPR_147	SPR	K4DD_db	K4DD_db	-1	Kinase	NA	512200	Clc1c(Nc2n[nH]c(OC(C)C)c2)nc(NC(C)c2ncc(F)cc2)nc1	5.71942	-4.78433	1.18447	K4DD	Clc1c(Nc2n[nH]c(OC(C)C)c2)nc(NC(C)c2ncc(F)cc2)nc1	3.088	100.64	391.838	100.64	0
AurA	AuroraA_SPR_147	SPR	K4DD_db	K4DD_db	-1	Kinase	NA	565844	O=C(O)c1c(C2CCCC2)cc(-c2c3c([nH]c2)ncc(-c2ccccc2)c3)cc1	6.52577	-5.51459	1.03552	K4DD	O=C(O)c1c(C2CCCC2)cc(-c2c3c([nH]c2)ncc(-c2ccccc2)c3)cc1	6.288	65.98	382.463	65.98	0
AurA	AuroraA_SPR_147	SPR	K4DD_db	K4DD_db	-1	Kinase	NA	570962	Fc1ncc(NC(=O)C2(C)N(C=3N=C(Nc4[nH]nc(C5CC5)c4)c4n(N=3)ccc4)CCC2)cc1	7.48486	-5.61476	1.87595	K4DD	Fc1ncc(NC(=O)C2(C)N(C=3N=C(Nc4[nH]nc(C5CC5)c4)c4n(N=3)ccc4)CCC2)cc1	3.233	115.59	461.505	116.13	2
AurA	AuroraA_SPR_147	SPR	K4DD_db	K4DD_db	-1	Kinase	NA	602271	Clc1c(C(Oc2c(N)ncc(-c3cn(C4CCNCC4)nc3)c2)C)c(Cl)ccc1F	7.04946	-5.88797	1.19337	K4DD	Clc1c(C(Oc2c(N)ncc(-c3cn(C4CCNCC4)nc3)c2)C)c(Cl)ccc1F	4.175	77.99	450.345	77.99	0
AurA	AuroraA_SPR_147	SPR	K4DD_db	K4DD_db	-1	Kinase	NA	608601	O=C(N(C)C1C(OC)C2(C)OC(n3c4c5n2c2c(c5c5c(C(=O)NC5)c4c4c3cccc4)cccc2)C1)c1ccccc1	7.71462	-5.37658	2.34132	K4DD	O=C(N(C)C1C(OC)C2(C)OC(n3c4c5n2c2c(c5c5c(C(=O)NC5)c4c4c3cccc4)cccc2)C1)c1ccccc1	7.86253	77.73	570.649	77.73	4
HSP90	HSP90_SPR_112	SPR	K4DD_db	K4DD_db	-1	HSP	NA	1349292	Clc1ccc(CN(C(=O)c2c(O)cc3[nH]nc(Cc4ccccc4)c3c2)C)cc1	5.81032	-4.27013	1.54021	K4DD	Clc1ccc(CN(C(=O)c2c(O)cc3[nH]nc(Cc4ccccc4)c3c2)C)cc1	5.418	69.22	405.885	69.22	0
HSP90	HSP90_SPR_112	SPR	K4DD_db	K4DD_db	-1	HSP	NA	1349306	O=C(N(Cc1ccccc1)C)c1c(O)cc2[nH]nc(Cc3cc(C)ccc3)c2c1	6.236	-4.58704	1.64904	K4DD	O=C(N(Cc1ccccc1)C)c1c(O)cc2[nH]nc(Cc3cc(C)ccc3)c2c1	5.161	69.22	385.467	69.22	0
HSP90	HSP90_SPR_112	SPR	K4DD_db	K4DD_db	-1	HSP	NA	3000022	Fc1c(N2C(c3c(O)cc(O)cc3)=NNC2=O)cccc1	7.01954	-5.94473	1.10403	K4DD	Fc1c(N2C(c3c(O)cc(O)cc3)=NNC2=O)cccc1	2.84	85.16	287.25	91.14	0
HSP90	HSP90_SPR_112	SPR	K4DD_db	K4DD_db	-1	HSP	NA	3000023	Brc1c(O)cc(O)c(C=2N(c3c(F)cccc3)C(=O)NN=2)c1	7.57512	-5.7146	1.8683	K4DD	Brc1c(O)cc(O)c(C=2N(c3c(F)cccc3)C(=O)NN=2)c1	3.673	85.16	366.146	91.14	0
HSP90	HSP90_SPR_112	SPR	K4DD_db	K4DD_db	-1	HSP	NA	3000024	Fc1c(N2C(c3c(O)cc(O)c(CCc4ccccc4)c3)=NNC2=O)cccc1	7.84315	-5.81544	2.02761	K4DD	Fc1c(N2C(c3c(O)cc(O)c(CCc4ccccc4)c3)=NNC2=O)cccc1	5.011	85.16	391.402	91.14	0
HSP90	HSP90_SPR_112	SPR	K4DD_db	K4DD_db	-1	HSP	NA	3000025	S(=O)(=O)(N(CCC)C)c1c(O)cc(O)c(C=2N(c3c(F)cccc3)C(=O)NN=2)c1	7.06248	-4.88773	2.19096	K4DD	S(=O)(=O)(N(CCC)C)c1c(O)cc(O)c(C=2N(c3c(F)cccc3)C(=O)NN=2)c1	2.576	122.54	422.437	128.52	0
HSP90	HSP90_SPR_112	SPR	K4DD_db	K4DD_db	-1	HSP	NA	3000026	S(=O)(=O)(N(C(C)C)C)c1c(O)cc(O)c(C=2N(c3c(F)cccc3)C(=O)NN=2)c1	6.36241	-4.51996	1.84375	K4DD	S(=O)(=O)(N(C(C)C)C)c1c(O)cc(O)c(C=2N(c3c(F)cccc3)C(=O)NN=2)c1	2.424	122.54	422.437	128.52	0
HSP90	HSP90_SPR_112	SPR	K4DD_db	K4DD_db	-1	HSP	NA	3000027	Brc1c(O)c(C(=O)O)cc(c1O)C=1N(c2c(F)cccc2)C(=O)NN=1	5.51794	-3.59608	1.92002	K4DD	Brc1c(O)c(C(=O)O)cc(c1O)C=1N(c2c(F)cccc2)C(=O)NN=1	3.309	122.46	410.155	128.44	0
HSP90	HSP90_SPR_112	SPR	K4DD_db	K4DD_db	-1	HSP	NA	3000028	Fc1c(N2C(c3c(O)cc(O)c(C(=O)O)c3)=NNC2=O)cccc1	6.23811	-4.32541	1.91686	K4DD	Fc1c(N2C(c3c(O)cc(O)c(C(=O)O)c3)=NNC2=O)cccc1	2.552	122.46	331.259	128.44	0
HSP90	HSP90_SPR_112	SPR	K4DD_db	K4DD_db	-1	HSP	NA	3000029	Fc1c(N2C(c3c(O)cc(O)c(C(=O)N(CCC)C)c3)=NNC2=O)cccc1	7.6269	-5.24601	2.38049	K4DD	Fc1c(N2C(c3c(O)cc(O)c(C(=O)N(CCC)C)c3)=NNC2=O)cccc1	3.326	105.47	386.383	111.45	0
HSP90	HSP90_SPR_112	SPR	K4DD_db	K4DD_db	-1	HSP	NA	3000030	Fc1c(N2C(c3c(O)cc(O)c(C(=O)N(CCCC)C)c3)=NNC2=O)cccc1	7.82304	-5.24502	2.57823	K4DD	Fc1c(N2C(c3c(O)cc(O)c(C(=O)N(CCCC)C)c3)=NNC2=O)cccc1	3.768	105.47	400.41	111.45	0
HSP90	HSP90_SPR_112	SPR	K4DD_db	K4DD_db	-1	HSP	NA	3000031	Fc1c(N2C(c3c(O)cc(O)c(C(=O)N(Cc4occc4)C)c3)=NNC2=O)cccc1	9.14207	-5.66232	3.48272	K4DD	Fc1c(N2C(c3c(O)cc(O)c(C(=O)N(Cc4occc4)C)c3)=NNC2=O)cccc1	2.874	118.61	424.388	124.59	0
HSP90	HSP90_SPR_112	SPR	K4DD_db	K4DD_db	-1	HSP	NA	3000033	Clc1c(C)c(Cn2c3nc(N)nc(Cl)c3cc2)ncc1C	7.95782	-6.46505	1.49692	K4DD	Clc1c(C)c(Cn2c3nc(N)nc(Cl)c3cc2)ncc1C	3.08453	69.62	322.199	69.62	0
HSP90	HSP90_SPR_112	SPR	K4DD_db	K4DD_db	-1	HSP	NA	3000034	Oc1c(-c2c(-c3ccccc3)con2)ccc(O)c1	7.01399	-6.11677	0.897909	K4DD	Oc1c(-c2c(-c3ccccc3)con2)ccc(O)c1	3.532	66.49	253.257	66.49	0
HSP90	HSP90_SPR_112	SPR	K4DD_db	K4DD_db	-1	HSP	NA	3000035	O=C(N1Cc2c(cccc2)C1)c1nc(N)nc2c1cc(C1(C(=O)NCC)CCC1)cc2	7.48346	-5.06781	2.43215	K4DD	O=C(N1Cc2c(cccc2)C1)c1nc(N)nc2c1cc(C1(C(=O)NCC)CCC1)cc2	2.809	101.21	415.497	101.21	0
HSP90	HSP90_SPR_112	SPR	K4DD_db	K4DD_db	-1	HSP	NA	3000064	O=C(N(Cc1ccccc1)C)c1c(O)cc(O)c(C=2N(c3c(C)cccc3)C(=O)NN=2)c1	8.01024	-5.05779	2.95248	K4DD	O=C(N(Cc1ccccc1)C)c1c(O)cc(O)c(C=2N(c3c(C)cccc3)C(=O)NN=2)c1	4.304	105.47	430.464	111.45	0
HSP90	HSP90_SPR_112	SPR	K4DD_db	K4DD_db	-1	HSP	NA	3000065	O=C(N(Cc1cc(C)ccc1)C)c1c(O)cc(O)c(C=2N(c3c(C)cccc3)C(=O)NN=2)c1	8.26254	-5.25688	3.00671	K4DD	O=C(N(Cc1cc(C)ccc1)C)c1c(O)cc(O)c(C=2N(c3c(C)cccc3)C(=O)NN=2)c1	4.639	105.47	444.491	111.45	0
HSP90	HSP90_SPR_112	SPR	K4DD_db	K4DD_db	-1	HSP	NA	3000066	O=C(N(Cc1c(OC)cccc1)C)c1c(O)cc(O)c(C=2N(c3c(C)cccc3)C(=O)NN=2)c1	8.4206	-5.52288	2.90193	K4DD	O=C(N(Cc1c(OC)cccc1)C)c1c(O)cc(O)c(C=2N(c3c(C)cccc3)C(=O)NN=2)c1	4.258	114.7	460.49	120.68	0
HSP90	HSP90_SPR_112	SPR	K4DD_db	K4DD_db	-1	HSP	NA	3000067	O=C(N(Cc1ccc(OC)cc1)C)c1c(O)cc(O)c(C=2N(c3c(C)cccc3)C(=O)NN=2)c1	7.45811	-5.13194	2.32606	K4DD	O=C(N(Cc1ccc(OC)cc1)C)c1c(O)cc(O)c(C=2N(c3c(C)cccc3)C(=O)NN=2)c1	4.26	114.7	460.49	120.68	0
HSP90	HSP90_SPR_112	SPR	K4DD_db	K4DD_db	-1	HSP	NA	3000068	O=C(N(Cc1c(C)cccc1)C)c1c(O)cc(O)c(C=2N(c3c(C)cccc3)C(=O)NN=2)c1	8.52095	-5.55064	2.97197	K4DD	O=C(N(Cc1c(C)cccc1)C)c1c(O)cc(O)c(C=2N(c3c(C)cccc3)C(=O)NN=2)c1	4.6	105.47	444.491	111.45	0
HSP90	HSP90_SPR_112	SPR	K4DD_db	K4DD_db	-1	HSP	NA	3000069	O=C(N(CC1OCCC1)C)c1c(O)cc(O)c(C=2N(c3c(C)cccc3)C(=O)NN=2)c1	7.25446	-5.06819	2.18509	K4DD	O=C(N(CC1OCCC1)C)c1c(O)cc(O)c(C=2N(c3c(C)cccc3)C(=O)NN=2)c1	3.087	114.7	424.457	120.68	0
HSP90	HSP90_SPR_112	SPR	K4DD_db	K4DD_db	-1	HSP	NA	3000070	O=C(N(Cc1c(-c2cnccc2)cccc1)C)c1c(O)cc(O)c(C=2N(c3c(C)cccc3)C(=O)NN=2)c1	7.46126	-4.8829	2.5806	K4DD	O=C(N(Cc1c(-c2cnccc2)cccc1)C)c1c(O)cc(O)c(C=2N(c3c(C)cccc3)C(=O)NN=2)c1	5.029	118.36	507.55	124.34	0
HSP90	HSP90_SPR_112	SPR	K4DD_db	K4DD_db	-1	HSP	NA	3000071	O=C(N(Cc1cc(-c2cncnc2)ccc1)C)c1c(O)cc(O)c(C=2N(c3c(C)cccc3)C(=O)NN=2)c1	7.14667	-4.63347	2.51381	K4DD	O=C(N(Cc1cc(-c2cncnc2)ccc1)C)c1c(O)cc(O)c(C=2N(c3c(C)cccc3)C(=O)NN=2)c1	3.923	131.25	508.538	137.23	0
HSP90	HSP90_SPR_112	SPR	K4DD_db	K4DD_db	-1	HSP	NA	3000072	O=C(N(Cc1sccc1)C)c1c(O)cc(O)c(C=2N(c3c(C)cccc3)C(=O)NN=2)c1	8.41946	-5.67425	2.74796	K4DD	O=C(N(Cc1sccc1)C)c1c(O)cc(O)c(C=2N(c3c(C)cccc3)C(=O)NN=2)c1	3.834	105.47	436.492	111.45	0
HSP90	HSP90_SPR_112	SPR	K4DD_db	K4DD_db	-1	HSP	NA	3000073	O=C(N(C)c1ccc(C2CCN(C)CC2)cc1)c1c(O)cc2[nH]nc(CCC)c2c1	8.29222	-5.73995	2.55249	K4DD	O=C(N(C)c1ccc(C2CCN(C)CC2)cc1)c1c(O)cc2[nH]nc(CCC)c2c1	4.385	72.46	406.53	72.46	0
HSP90	HSP90_SPR_112	SPR	K4DD_db	K4DD_db	-1	HSP	NA	3000074	O=C(N(C)c1ccc(N2CCOCC2)cc1)c1c(O)cc2[nH]nc(C(CC)C)c2c1	8.23586	-5.44362	2.79385	K4DD	O=C(N(C)c1ccc(N2CCOCC2)cc1)c1c(O)cc2[nH]nc(C(CC)C)c2c1	3.71	81.69	408.502	81.69	0
HSP90	HSP90_SPR_112	SPR	K4DD_db	K4DD_db	-1	HSP	NA	3000075	Brc1c(O)c(C(=O)N(C)c2ccc(N3CCOCC3)cc2)cc2c(CCC)n[nH]c12	8.46967	-5.90713	2.56269	K4DD	Brc1c(O)c(C(=O)N(C)c2ccc(N3CCOCC3)cc2)cc2c(CCC)n[nH]c12	4.097	81.69	473.371	81.69	0
HSP90	HSP90_SPR_112	SPR	K4DD_db	K4DD_db	-1	HSP	NA	3000076	O=C(N(C)c1ccc(N2CCOCC2)cc1)c1c(O)cc2[nH]nc(C(=O)CC)c2c1	6.01403	-5.47857	0.538201	K4DD	O=C(N(C)c1ccc(N2CCOCC2)cc1)c1c(O)cc2[nH]nc(C(=O)CC)c2c1	2.453	98.76	408.458	98.76	0
HSP90	HSP90_SPR_112	SPR	K4DD_db	K4DD_db	-1	HSP	NA	3000077	O=C(N(C)c1ccc(N2CCOCC2)cc1)c1c(O)cc2[nH]nc(COC)c2c1	7.92064	-5.40376	2.51631	K4DD	O=C(N(C)c1ccc(N2CCOCC2)cc1)c1c(O)cc2[nH]nc(COC)c2c1	2.215	90.92	396.447	90.92	0
HSP90	HSP90_SPR_112	SPR	K4DD_db	K4DD_db	-1	HSP	NA	3000078	O=C(N(C)c1ccc(N2CCOCC2)cc1)c1c(O)cc2[nH]nc(C(O)CC)c2c1	6.78961	-5.04149	1.63111	K4DD	O=C(N(C)c1ccc(N2CCOCC2)cc1)c1c(O)cc2[nH]nc(C(O)CC)c2c1	2.679	101.92	410.474	101.92	0
HSP90	HSP90_SPR_112	SPR	K4DD_db	K4DD_db	-1	HSP	NA	3000079	FC(CC)c1n[nH]c2c1cc(C(=O)N(C)c1ccc(N3CCOCC3)cc1)c(O)c2	7.09391	-4.28544	2.81304	K4DD	FC(CC)c1n[nH]c2c1cc(C(=O)N(C)c1ccc(N3CCOCC3)cc1)c(O)c2	3.488	81.69	412.465	81.69	0
HSP90	HSP90_SPR_112	SPR	K4DD_db	K4DD_db	-1	HSP	NA	3000080	O=C(N(CC(C)C)C)c1n[nH]c2c1cc(C(=O)N(C)c1ccc(N3CCOCC3)cc1)c(O)c2	7.20271	-4.34054	2.8687	K4DD	O=C(N(CC(C)C)C)c1n[nH]c2c1cc(C(=O)N(C)c1ccc(N3CCOCC3)cc1)c(O)c2	2.934	102	465.554	102	0
HSP90	HSP90_SPR_112	SPR	K4DD_db	K4DD_db	-1	HSP	NA	3000081	O=C(N(C)c1ccc(N2CCOCC2)cc1)c1c(O)cc2[nH]nc(C(=O)N3CCOCC3)c2c1	6.31435	-4.43425	1.88033	K4DD	O=C(N(C)c1ccc(N2CCOCC2)cc1)c1c(O)cc2[nH]nc(C(=O)N3CCOCC3)c2c1	1.187	111.23	465.51	111.23	0
HSP90	HSP90_SPR_112	SPR	K4DD_db	K4DD_db	-1	HSP	NA	3000121	Fc1c(-c2c(C)[nH]nc2-c2c(O)cc(O)c(CC)c2)cccc1	6.28918	-5.09061	1.19812	K4DD	Fc1c(-c2c(C)[nH]nc2-c2c(O)cc(O)c(CC)c2)cccc1	4.851	69.14	312.344	69.14	0
HSP90	HSP90_SPR_112	SPR	K4DD_db	K4DD_db	-1	HSP	NA	3000122	Clc1ccc(CN(C(=O)c2c(O)cc3[nH]nc(Cc4cc(C)ccc4)c3c2)C)cc1	5.90681	-4.15178	1.76037	K4DD	Clc1ccc(CN(C(=O)c2c(O)cc3[nH]nc(Cc4cc(C)ccc4)c3c2)C)cc1	5.753	69.22	419.912	69.22	0
HSP90	HSP90_SPR_112	SPR	K4DD_db	K4DD_db	-1	HSP	NA	3000123	Oc1c(-c2n(-c3ccccc3)ncc2)cc2c(Cc3ccccc3)n[nH]c2c1	5.37438	-4.73838	0.635261	K4DD	Oc1c(-c2n(-c3ccccc3)ncc2)cc2c(Cc3ccccc3)n[nH]c2c1	5.094	66.73	366.424	66.73	0
HSP90	HSP90_SPR_112	SPR	K4DD_db	K4DD_db	-1	HSP	NA	3000124	O=C(N(C)c1ccc(C2CCN(C)CC2)cc1)c1c(O)cc2[nH]nc(CCC(C)(C)C)c2c1	7.26879	-4.40335	2.85704	K4DD	O=C(N(C)c1ccc(C2CCN(C)CC2)cc1)c1c(O)cc2[nH]nc(CCC(C)(C)C)c2c1	5.584	72.46	448.611	72.46	0
HSP90	HSP90_SPR_112	SPR	K4DD_db	K4DD_db	-1	HSP	NA	3000125	O=C(N(CCCC)C)c1n[nH]c2c1cc(C(=O)N(C)c1ccc(N3CCOCC3)cc1)c(O)c2	8.22494	-5.53517	2.69605	K4DD	O=C(N(CCCC)C)c1n[nH]c2c1cc(C(=O)N(C)c1ccc(N3CCOCC3)cc1)c(O)c2	3.018	102	465.554	102	0
HSP90	HSP90_SPR_112	SPR	K4DD_db	K4DD_db	-1	HSP	NA	3000222	O=C(N(C)c1ccccc1)c1c(O)cc2[nH]nc(Cc3cc(C)ccc3)c2c1	7.66324	-5.62588	2.03959	K4DD	O=C(N(C)c1ccccc1)c1c(O)cc2[nH]nc(Cc3cc(C)ccc3)c2c1	5.027	69.22	371.44	69.22	0
HSP90	HSP90_SPR_112	SPR	K4DD_db	K4DD_db	-1	HSP	NA	3000223	O=C(N(C)c1ccc(C)cc1)c1c(O)cc2[nH]nc(Cc3cc(C)ccc3)c2c1	7.4083	-5.10924	2.29814	K4DD	O=C(N(C)c1ccc(C)cc1)c1c(O)cc2[nH]nc(Cc3cc(C)ccc3)c2c1	5.325	69.22	385.467	69.22	0
HSP90	HSP90_SPR_112	SPR	K4DD_db	K4DD_db	-1	HSP	NA	3000224	O=C(N(C)c1cc2OCOc2cc1)c1c(O)cc2[nH]nc(Cc3cc(C)ccc3)c2c1	7.75457	-5.46692	2.30115	K4DD	O=C(N(C)c1cc2OCOc2cc1)c1c(O)cc2[nH]nc(Cc3cc(C)ccc3)c2c1	4.732	87.68	415.449	87.68	0
HSP90	HSP90_SPR_112	SPR	K4DD_db	K4DD_db	-1	HSP	NA	3000226	O=C(N(C)c1ccc(N2CCN(C)CC2)cc1)c1c(O)cc2[nH]nc(Cc3cc(C)ccc3)c2c1	8.4477	-5.33465	3.12357	K4DD	O=C(N(C)c1ccc(N2CCN(C)CC2)cc1)c1c(O)cc2[nH]nc(Cc3cc(C)ccc3)c2c1	4.467	75.7	469.589	75.7	0
HSP90	HSP90_SPR_112	SPR	K4DD_db	K4DD_db	-1	HSP	NA	3000227	O=C(N(C)c1ccc(N2C(=O)COCC2)cc1)c1c(O)cc2[nH]nc(Cc3cc(C)ccc3)c2c1	8.0756	-5.21573	2.86331	K4DD	O=C(N(C)c1ccc(N2C(=O)COCC2)cc1)c1c(O)cc2[nH]nc(Cc3cc(C)ccc3)c2c1	3.955	98.76	470.529	98.76	0
HSP90	HSP90_SPR_112	SPR	K4DD_db	K4DD_db	-1	HSP	NA	3000228	O=C(N(C)c1ccc(N(C)C)cc1)c1c(O)cc2[nH]nc(Cc3cc(C)ccc3)c2c1	7.65397	-5.03658	2.62592	K4DD	O=C(N(C)c1ccc(N(C)C)cc1)c1c(O)cc2[nH]nc(Cc3cc(C)ccc3)c2c1	4.942	72.46	414.509	72.46	0
HSP90	HSP90_SPR_112	SPR	K4DD_db	K4DD_db	-1	HSP	NA	3000229	O=C(N(C)c1ccc(N2CCNCC2)cc1)c1c(O)cc2[nH]nc(Cc3cc(C)ccc3)c2c1	8.3386	-5.43136	2.90716	K4DD	O=C(N(C)c1ccc(N2CCNCC2)cc1)c1c(O)cc2[nH]nc(Cc3cc(C)ccc3)c2c1	4.199	84.49	455.562	84.49	0
HSP90	HSP90_SPR_112	SPR	K4DD_db	K4DD_db	-1	HSP	NA	3000231	Fc1c(F)cc(c(Cc2[nH]nnn2)c1)-c1cc2c(C(=O)N3Cc4c(cccc4)C3)nc(N)nc2cc1	7.6119	-4.80485	2.82246	K4DD	Fc1c(F)cc(c(Cc2[nH]nnn2)c1)-c1cc2c(C(=O)N3Cc4c(cccc4)C3)nc(N)nc2cc1	3.382	126.57	484.47	126.57	0
HSP90	HSP90_SPR_112	SPR	K4DD_db	K4DD_db	-1	HSP	NA	3000234	Clc1c(-n2c(-c3c(O)cc(O)c(CCc4ncccc4)c3)ccn2)cccc1	6.62711	-5.87023	0.760575	K4DD	Clc1c(-n2c(-c3c(O)cc(O)c(CCc4ncccc4)c3)ccn2)cccc1	4.367	71.17	391.858	71.17	0
HSP90	HSP90_SPR_112	SPR	K4DD_db	K4DD_db	-1	HSP	NA	3000235	O=C(N1Cc2c(cccc2)C1)c1nc(N)nc2c1cccc2	5.66706	-5.40866	0.258179	K4DD	O=C(N1Cc2c(cccc2)C1)c1nc(N)nc2c1cccc2	1.72	72.11	290.326	72.11	0
HSP90	HSP90_SPR_112	SPR	K4DD_db	K4DD_db	-1	HSP	NA	3000236	O=C(N1Cc2c(cccc2)C1)c1nc(N)nc2c1cc(C)cc2	6.29634	-5.74065	0.55424	K4DD	O=C(N1Cc2c(cccc2)C1)c1nc(N)nc2c1cc(C)cc2	2.055	72.11	304.353	72.11	0
HSP90	HSP90_SPR_112	SPR	K4DD_db	K4DD_db	-1	HSP	NA	3000237	O=C(N1Cc2c(ccc(O)c2)C1)c1nc(N)nc2c1cccc2	4.69454	-4.45217	0.256647	K4DD	O=C(N1Cc2c(ccc(O)c2)C1)c1nc(N)nc2c1cccc2	1.449	92.34	306.325	92.34	0
HSP90	HSP90_SPR_112	SPR	K4DD_db	K4DD_db	-1	HSP	NA	3000238	O=C(N1Cc2c(ccc(O)c2)C1)c1nc(N)nc2c1cc(C)cc2	5.17829	-4.75742	0.422393	K4DD	O=C(N1Cc2c(ccc(O)c2)C1)c1nc(N)nc2c1cc(C)cc2	1.784	92.34	320.352	92.34	0
HSP90	HSP90_SPR_112	SPR	K4DD_db	K4DD_db	-1	HSP	NA	3000239	Brc1cc2c(cc1)CN(C(=O)c1nc(N)nc3c1cc(C)cc3)C2	6.13224	-5.07755	1.05479	K4DD	Brc1cc2c(cc1)CN(C(=O)c1nc(N)nc3c1cc(C)cc3)C2	2.89	72.11	383.249	72.11	0
HSP90	HSP90_SPR_112	SPR	K4DD_db	K4DD_db	-1	HSP	NA	3000240	O=C(N1Cc2c(ccc(OC)c2)C1)c1nc(N)nc2c1cc(C)cc2	5.54867	-4.95787	0.588759	K4DD	O=C(N1Cc2c(ccc(OC)c2)C1)c1nc(N)nc2c1cc(C)cc2	2.048	81.34	334.379	81.34	0
HSP90	HSP90_SPR_112	SPR	K4DD_db	K4DD_db	-1	HSP	NA	3000241	O=C(N1Cc2c(ccc(OCC)c2)C1)c1nc(N)nc2c1cc(C)cc2	5.31638	-4.63545	0.681658	K4DD	O=C(N1Cc2c(ccc(OCC)c2)C1)c1nc(N)nc2c1cc(C)cc2	2.389	81.34	348.406	81.34	0
HSP90	HSP90_SPR_112	SPR	K4DD_db	K4DD_db	-1	HSP	NA	3000242	O=C(N1Cc2c(cccc2)C1)c1nc(N)nc2c1cc(-c1c(CO)cccc1)cc2	7.62275	-5.20987	2.41281	K4DD	O=C(N1Cc2c(cccc2)C1)c1nc(N)nc2c1cc(-c1c(CO)cccc1)cc2	3.193	92.34	396.45	92.34	0
HSP90	HSP90_SPR_112	SPR	K4DD_db	K4DD_db	-1	HSP	NA	3000243	O=C(N1Cc2c(cccc2)C1)c1nc(N)nc2c1cc(O)cc2	6.0003	-5.75949	0.241694	K4DD	O=C(N1Cc2c(cccc2)C1)c1nc(N)nc2c1cc(O)cc2	1.449	92.34	306.325	92.34	0
HSP90	HSP90_SPR_112	SPR	K4DD_db	K4DD_db	-1	HSP	NA	3000244	O=C(N(C)c1ccc(N2CCOCC2)cc1)c1c(O)cc2[nH]nc(C(=O)N3CCCC3)c2c1	7.72746	-5.11277	2.61497	K4DD	O=C(N(C)c1ccc(N2CCOCC2)cc1)c1c(O)cc2[nH]nc(C(=O)N3CCCC3)c2c1	2.153	102	449.511	102	0
HSP90	HSP90_SPR_112	SPR	K4DD_db	K4DD_db	-1	HSP	NA	3000245	O=C(N(C)c1ccc(N2CCOCC2)cc1)c1c(O)cc2[nH]nc(C(=O)N3CC(OC)CCC3)c2c1	6.7093	-3.21814	3.5318	K4DD	O=C(N(C)c1ccc(N2CCOCC2)cc1)c1c(O)cc2[nH]nc(C(=O)N3CC(OC)CCC3)c2c1	2.192	111.23	493.564	111.23	0
HSP90	HSP90_SPR_112	SPR	K4DD_db	K4DD_db	-1	HSP	NA	3000246	O=C(N(C)c1ccc(N2CCOCC2)cc1)c1c(O)cc2[nH]nc(C(=O)N3CC(OC)CC3)c2c1	7.08446	-4.22332	2.86138	K4DD	O=C(N(C)c1ccc(N2CCOCC2)cc1)c1c(O)cc2[nH]nc(C(=O)N3CC(OC)CC3)c2c1	1.75	111.23	479.537	111.23	0
HSP90	HSP90_SPR_112	SPR	K4DD_db	K4DD_db	-1	HSP	NA	317090	O(C)c1ccc(-c2c(C)[nH]nc2-c2c(O)cc(O)cc2)cc1	6.04489	-5.44986	0.594483	K4DD	O(C)c1ccc(-c2c(C)[nH]nc2-c2c(O)cc(O)cc2)cc1	3.848	78.37	296.326	78.37	0
HSP90	HSP90_SPR_112	SPR	K4DD_db	K4DD_db	-1	HSP	NA	317497	Clc1c(O)cc(O)c(-c2c(c(C(=O)NCC)n[nH]2)-c2ccc(OC)cc2)c1	7.97062	-5.98697	1.98176	K4DD	Clc1c(O)cc(O)c(-c2c(c(C(=O)NCC)n[nH]2)-c2ccc(OC)cc2)c1	3.817	107.47	387.823	107.47	0
HSP90	HSP90_SPR_112	SPR	K4DD_db	K4DD_db	-1	HSP	NA	335628	Ic1c(Sc2n(CCCNC(C)C)c3ncnc(N)c3n2)cc2OCOc2c1	8.11804	-5.6603	2.46294	K4DD	Ic1c(Sc2n(CCCNC(C)C)c3ncnc(N)c3n2)cc2OCOc2c1	4.03306	100.11	512.376	100.11	1
HSP90	HSP90_SPR_112	SPR	K4DD_db	K4DD_db	-1	HSP	NA	419065	Clc1c(O)cc(O)c(-c2c(c(C(=O)NCC)no2)-c2ccc(OC)cc2)c1	8.46092	-5.75989	2.70213	K4DD	Clc1c(O)cc(O)c(-c2c(c(C(=O)NCC)no2)-c2ccc(OC)cc2)c1	3.633	104.82	388.807	104.82	0
HSP90	HSP90_SPR_134	SPR	K4DD_db	K4DD_db	-1	HSP	NA	1265196	O=C(NC1c2c(c(-c3[nH]c4c(n3)cncc4)ccc2)-c2c1cccc2)c1ccncc1	8.11144	-3.96239	4.14905	K4DD	O=C(NC1c2c(c(-c3[nH]c4c(n3)cncc4)ccc2)-c2c1cccc2)c1ccncc1	3.82953	83.56	403.445	83.56	0
HSP90	HSP90_SPR_134	SPR	K4DD_db	K4DD_db	-1	HSP	NA	1265198	O=C(NC1c2c(c(-c3[nH]c4c(n3)cncc4)ccc2)-c2c1cccc2)c1cc(N)ncc1	7.0207	-4.01603	3.00467	K4DD	O=C(NC1c2c(c(-c3[nH]c4c(n3)cncc4)ccc2)-c2c1cccc2)c1cc(N)ncc1	3.59953	109.58	418.46	109.58	0
HSP90	HSP90_SPR_134	SPR	K4DD_db	K4DD_db	-1	HSP	NA	3000033	Clc1c(C)c(Cn2c3nc(N)nc(Cl)c3cc2)ncc1C	7.69075	-6.09877	1.59198	K4DD	Clc1c(C)c(Cn2c3nc(N)nc(Cl)c3cc2)ncc1C	3.08453	69.62	322.199	69.62	0
HSP90	HSP90_SPR_134	SPR	K4DD_db	K4DD_db	-1	HSP	NA	3000034	Oc1c(-c2c(-c3ccccc3)con2)ccc(O)c1	7.04782	-5.80745	1.24037	K4DD	Oc1c(-c2c(-c3ccccc3)con2)ccc(O)c1	3.532	66.49	253.257	66.49	0
HSP90	HSP90_SPR_134	SPR	K4DD_db	K4DD_db	-1	HSP	NA	3000098	Clc1c(O)cc(O)c2C(=O)OC(C)CC3OC3C=CC=CC(=O)Cc12	6.18304	-4.74987	1.43317	K4DD	Clc1c(O)cc(O)c2C(=O)OC(C)CC3OC3C=CC=CC(=O)Cc12	3.315	96.36	364.781	96.36	0
HSP90	HSP90_SPR_134	SPR	K4DD_db	K4DD_db	-1	HSP	NA	3000099	O=C(NC1c2c(c(-c3[nH]c4c(n3)cncc4)ccc2)-c2c1cccc2)c1c2c([nH]cc2)ncc1	8.43871	-5.12418	3.31453	K4DD	O=C(NC1c2c(c(-c3[nH]c4c(n3)cncc4)ccc2)-c2c1cccc2)c1c2c([nH]cc2)ncc1	4.24353	99.35	442.482	99.35	0
HSP90	HSP90_SPR_134	SPR	K4DD_db	K4DD_db	-1	HSP	NA	3000100	O=C(N)c1c(NC2CCC(O)CC2)cc(-n2nc(C)c3c(-c4cnc5c(c4)cccc5)cccc23)cc1	8.07555	-4.21005	3.8655	K4DD	O=C(N)c1c(NC2CCC(O)CC2)cc(-n2nc(C)c3c(-c4cnc5c(c4)cccc5)cccc23)cc1	5.013	106.06	491.595	106.06	0
HSP90	HSP90_SPR_134	SPR	K4DD_db	K4DD_db	-1	HSP	NA	3000102	Fc1ccc(NC(=O)c2c(N)c3c(c(C#N)c(N)nc3s2)-c2cc(OC)c(OC)cc2)cc1	5.35768	-4.20804	1.14964	K4DD	Fc1ccc(NC(=O)c2c(N)c3c(c(C#N)c(N)nc3s2)-c2cc(OC)c(OC)cc2)cc1	3.32574	136.28	463.493	136.28	0
HSP90	HSP90_SPR_134	SPR	K4DD_db	K4DD_db	-1	HSP	NA	3000104	O=C(Nc1cc2OCOc2cc1)c1c(N)c2c(c(C#N)c(N)nc2s1)-c1ccc(CC)cc1	4.39337	-3.94053	0.452841	K4DD	O=C(Nc1cc2OCOc2cc1)c1c(N)c2c(c(C#N)c(N)nc2s1)-c1ccc(CC)cc1	3.952	136.28	457.514	136.28	0
HSP90	HSP90_SPR_134	SPR	K4DD_db	K4DD_db	-1	HSP	NA	3000105	Brc1ccc(NC(=O)c2c(N)c3c(c(C#N)c(N)nc3s2)-c2cc(OC)c(OC)cc2)cc1	4.75337	-3.80414	0.949234	K4DD	Brc1ccc(NC(=O)c2c(N)c3c(c(C#N)c(N)nc3s2)-c2cc(OC)c(OC)cc2)cc1	3.97074	136.28	524.399	136.28	0
HSP90	HSP90_SPR_134	SPR	K4DD_db	K4DD_db	-1	HSP	NA	3000106	Fc1cc2[nH]c(-c3c-4c(C(NC(=O)c5c6c([nH]cc6)ncc5)c5c-4cccc5)ccc3)nc2cc1	7.40124	-3.67828	3.72296	K4DD	Fc1cc2[nH]c(-c3c-4c(C(NC(=O)c5c6c([nH]cc6)ncc5)c5c-4cccc5)ccc3)nc2cc1	5.471	86.46	459.484	86.46	0
HSP90	HSP90_SPR_134	SPR	K4DD_db	K4DD_db	-1	HSP	NA	3000109	Clc1c(C(=O)NC2c3c(c(-c4[nH]c5c(n4)cncc5)ccc3)-c3c2cccc3)nc(N)nc1	7.62794	-4.27196	3.35599	K4DD	Clc1c(C(=O)NC2c3c(c(-c4[nH]c5c(n4)cncc5)ccc3)-c3c2cccc3)nc(N)nc1	2.93053	122.47	453.893	122.47	0
HSP90	HSP90_SPR_134	SPR	K4DD_db	K4DD_db	-1	HSP	NA	3000110	Brc1c(C(=O)NC2c3c(c(-c4cnc5c(c4)cccc5)ccc3)-c3c2cccc3)c2nc[nH]c2nc1	7.04148	-3.4853	3.55619	K4DD	Brc1c(C(=O)NC2c3c(c(-c4cnc5c(c4)cccc5)ccc3)-c3c2cccc3)c2nc[nH]c2nc1	6.27153	83.56	532.401	83.56	0
HSP90	HSP90_SPR_134	SPR	K4DD_db	K4DD_db	-1	HSP	NA	3000112	O=C(NC1c2c(c(-c3[nH]c4c(n3)cncc4)ccc2)-c2c1cccc2)c1c2c([nH]cc2)ncc1	8.17406	-4.14772	4.02634	K4DD	O=C(NC1c2c(c(-c3[nH]c4c(n3)cncc4)ccc2)-c2c1cccc2)c1c2c([nH]cc2)ncc1	4.24353	99.35	442.482	99.35	0
HSP90	HSP90_SPR_134	SPR	K4DD_db	K4DD_db	-1	HSP	NA	3000113	O=C(N)c1c(NC2CCC(O)CC2)cc(-n2c3c(c(C)c2)C(=O)CC(C)(C)C3)cc1	8.43871	-5.12418	3.31453	K4DD	O=C(N)c1c(NC2CCC(O)CC2)cc(-n2c3c(c(C)c2)C(=O)CC(C)(C)C3)cc1	3.65	97.35	409.53	97.35	0
HSP90	HSP90_SPR_134	SPR	K4DD_db	K4DD_db	-1	HSP	NA	3000114	O=C(N)c1c(NC2CCC(=O)CC2)cc(-n2c3c(c(C)c2)C(=O)CC(C)(C)C3)cc1	9.66983	-6.55352	3.11631	K4DD	O=C(N)c1c(NC2CCC(=O)CC2)cc(-n2c3c(c(C)c2)C(=O)CC(C)(C)C3)cc1	3.07	94.19	407.514	94.19	0
HSP90	HSP90_SPR_134	SPR	K4DD_db	K4DD_db	-1	HSP	NA	336300	Ic1c(Sc2n(CCNCC(C)(C)C)c3ncnc(N)c3n2)cc(OC)cc1	8.46895	-6.10795	2.361	K4DD	Ic1c(Sc2n(CCNCC(C)(C)C)c3ncnc(N)c3n2)cc(OC)cc1	4.75106	90.88	512.42	90.88	0
HSP90	HSP90_SPR_167	SPR	K4DD_db	K4DD_db	-1	HSP	NA	3000022	Fc1c(N2C(c3c(O)cc(O)cc3)=NNC2=O)cccc1	6.25724	-5.71326	0.542989	K4DD	Fc1c(N2C(c3c(O)cc(O)cc3)=NNC2=O)cccc1	2.84	85.16	287.25	91.14	0
HSP90	HSP90_SPR_167	SPR	K4DD_db	K4DD_db	-1	HSP	NA	3000023	Brc1c(O)cc(O)c(C=2N(c3c(F)cccc3)C(=O)NN=2)c1	6.62594	-5.32485	1.30155	K4DD	Brc1c(O)cc(O)c(C=2N(c3c(F)cccc3)C(=O)NN=2)c1	3.673	85.16	366.146	91.14	0
HSP90	HSP90_SPR_167	SPR	K4DD_db	K4DD_db	-1	HSP	NA	3000025	S(=O)(=O)(N(CCC)C)c1c(O)cc(O)c(C=2N(c3c(F)cccc3)C(=O)NN=2)c1	7.85691	-5.39798	2.45936	K4DD	S(=O)(=O)(N(CCC)C)c1c(O)cc(O)c(C=2N(c3c(F)cccc3)C(=O)NN=2)c1	2.576	122.54	422.437	128.52	0
HSP90	HSP90_SPR_167	SPR	K4DD_db	K4DD_db	-1	HSP	NA	3000026	S(=O)(=O)(N(C(C)C)C)c1c(O)cc(O)c(C=2N(c3c(F)cccc3)C(=O)NN=2)c1	6.5376	-5.22109	1.31729	K4DD	S(=O)(=O)(N(C(C)C)C)c1c(O)cc(O)c(C=2N(c3c(F)cccc3)C(=O)NN=2)c1	2.424	122.54	422.437	128.52	0
HSP90	HSP90_SPR_167	SPR	K4DD_db	K4DD_db	-1	HSP	NA	3000029	Fc1c(N2C(c3c(O)cc(O)c(C(=O)N(CCC)C)c3)=NNC2=O)cccc1	7.25974	-5.35392	1.91201	K4DD	Fc1c(N2C(c3c(O)cc(O)c(C(=O)N(CCC)C)c3)=NNC2=O)cccc1	3.326	105.47	386.383	111.45	0
HSP90	HSP90_SPR_167	SPR	K4DD_db	K4DD_db	-1	HSP	NA	3000030	Fc1c(N2C(c3c(O)cc(O)c(C(=O)N(CCCC)C)c3)=NNC2=O)cccc1	8.05931	-5.65287	2.40727	K4DD	Fc1c(N2C(c3c(O)cc(O)c(C(=O)N(CCCC)C)c3)=NNC2=O)cccc1	3.768	105.47	400.41	111.45	0
HSP90	HSP90_SPR_167	SPR	K4DD_db	K4DD_db	-1	HSP	NA	3000031	Fc1c(N2C(c3c(O)cc(O)c(C(=O)N(Cc4occc4)C)c3)=NNC2=O)cccc1	8.36653	-5.79309	2.58503	K4DD	Fc1c(N2C(c3c(O)cc(O)c(C(=O)N(Cc4occc4)C)c3)=NNC2=O)cccc1	2.874	118.61	424.388	124.59	0
HSP90	HSP90_SPR_167	SPR	K4DD_db	K4DD_db	-1	HSP	NA	3000064	O=C(N(Cc1ccccc1)C)c1c(O)cc(O)c(C=2N(c3c(C)cccc3)C(=O)NN=2)c1	8.39745	-5.90333	2.49778	K4DD	O=C(N(Cc1ccccc1)C)c1c(O)cc(O)c(C=2N(c3c(C)cccc3)C(=O)NN=2)c1	4.304	105.47	430.464	111.45	0
HSP90	HSP90_SPR_167	SPR	K4DD_db	K4DD_db	-1	HSP	NA	3000065	O=C(N(Cc1cc(C)ccc1)C)c1c(O)cc(O)c(C=2N(c3c(C)cccc3)C(=O)NN=2)c1	8.38918	-5.92799	2.46509	K4DD	O=C(N(Cc1cc(C)ccc1)C)c1c(O)cc(O)c(C=2N(c3c(C)cccc3)C(=O)NN=2)c1	4.639	105.47	444.491	111.45	0
HSP90	HSP90_SPR_167	SPR	K4DD_db	K4DD_db	-1	HSP	NA	3000069	O=C(N(CC1OCCC1)C)c1c(O)cc(O)c(C=2N(c3c(C)cccc3)C(=O)NN=2)c1	7.67675	-5.08337	2.60384	K4DD	O=C(N(CC1OCCC1)C)c1c(O)cc(O)c(C=2N(c3c(C)cccc3)C(=O)NN=2)c1	3.087	114.7	424.457	120.68	0
HSP90	HSP90_SPR_167	SPR	K4DD_db	K4DD_db	-1	HSP	NA	3000072	O=C(N(Cc1sccc1)C)c1c(O)cc(O)c(C=2N(c3c(C)cccc3)C(=O)NN=2)c1	8.20689	-5.447	2.77374	K4DD	O=C(N(Cc1sccc1)C)c1c(O)cc(O)c(C=2N(c3c(C)cccc3)C(=O)NN=2)c1	3.834	105.47	436.492	111.45	0
HSP90	HSP90_SPR_167	SPR	K4DD_db	K4DD_db	-1	HSP	NA	3000154	Ic1c(O)cc(O)c(-c2n(-c3c(F)cccc3)ncc2)c1	5.77919	-5.49601	0.284693	K4DD	Ic1c(O)cc(O)c(-c2n(-c3c(F)cccc3)ncc2)c1	4.253	58.28	396.159	58.28	0
HSP90	HSP90_SPR_167	SPR	K4DD_db	K4DD_db	-1	HSP	NA	3000155	O=C1N(c2c(C)cccc2)C(c2c(O)cc(O)cc2)=NN1	6.48966	-5.58405	0.904743	K4DD	O=C1N(c2c(C)cccc2)C(c2c(O)cc(O)cc2)=NN1	2.985	85.16	283.287	91.14	0
HSP90	HSP90_SPR_167	SPR	K4DD_db	K4DD_db	-1	HSP	NA	3000156	Clc1c(N2C(c3c(O)cc(O)cc3)=NNC2=O)cccc1	6.65243	-6.01373	0.643066	K4DD	Clc1c(N2C(c3c(O)cc(O)cc3)=NNC2=O)cccc1	3.279	85.16	303.705	91.14	0
HSP90	HSP90_SPR_167	SPR	K4DD_db	K4DD_db	-1	HSP	NA	3000157	O=C1N(c2c(CC)cccc2)C(c2c(O)cc(O)cc2)=NN1	6.59282	-5.80552	0.789013	K4DD	O=C1N(c2c(CC)cccc2)C(c2c(O)cc(O)cc2)=NN1	3.46	85.16	297.314	91.14	0
HSP90	HSP90_SPR_167	SPR	K4DD_db	K4DD_db	-1	HSP	NA	3000158	Clc1c(-c2c(C)[nH]nc2-c2c(O)cc(O)c(CC)c2)cccc1	5.09887	-4.56104	0.547524	K4DD	Clc1c(-c2c(C)[nH]nc2-c2c(O)cc(O)c(CC)c2)cccc1	5.29	69.14	328.799	69.14	0
HSP90	HSP90_SPR_167	SPR	K4DD_db	K4DD_db	-1	HSP	NA	3000159	Oc1c(CCC)cc(-c2c(-c3cc4OCCOc4cc3)c[nH]n2)c(O)c1	5.24037	-4.88881	0.351274	K4DD	Oc1c(CCC)cc(-c2c(-c3cc4OCCOc4cc3)c[nH]n2)c(O)c1	4.479	87.6	352.39	87.6	0
HSP90	HSP90_SPR_167	SPR	K4DD_db	K4DD_db	-1	HSP	NA	3000160	Clc1c(N2C(c3c(O)cc(O)c(S(=O)(=O)N(C(C)C)C)c3)=NNC2=O)cccc1	6.5822	-5.03073	1.55905	K4DD	Clc1c(N2C(c3c(O)cc(O)c(S(=O)(=O)N(C(C)C)C)c3)=NNC2=O)cccc1	2.863	122.54	438.892	128.52	0
HSP90	HSP90_SPR_167	SPR	K4DD_db	K4DD_db	-1	HSP	NA	3000161	O=C(N(CCC)C)c1c(O)cc(O)c(C=2N(c3c(C)cccc3)C(=O)NN=2)c1	7.55697	-5.28925	2.27305	K4DD	O=C(N(CCC)C)c1c(O)cc(O)c(C=2N(c3c(C)cccc3)C(=O)NN=2)c1	3.471	105.47	382.42	111.45	0
HSP90	HSP90_SPR_167	SPR	K4DD_db	K4DD_db	-1	HSP	NA	3000162	O=C(N(CCCCCC)C)c1c(O)cc(O)c(-c2n(-c3c(C)cccc3)ncc2)c1	7.1711	-5.76234	1.40816	K4DD	O=C(N(CCCCCC)C)c1c(O)cc(O)c(-c2n(-c3c(C)cccc3)ncc2)c1	4.985	78.59	407.514	78.59	0
HSP90	HSP90_SPR_167	SPR	K4DD_db	K4DD_db	-1	HSP	NA	3000163	O=C(N(Cc1occc1)C)c1c(O)cc(O)c(-c2n(-c3c(C)cccc3)ncc2)c1	8.76859	-6.2431	2.52863	K4DD	O=C(N(Cc1occc1)C)c1c(O)cc(O)c(-c2n(-c3c(C)cccc3)ncc2)c1	3.207	91.73	403.438	91.73	0
HSP90	HSP90_SPR_167	SPR	K4DD_db	K4DD_db	-1	HSP	NA	3000164	O=C(N(CCCC)C)c1c(O)cc(O)c(C=2N(c3ccccc3)C(=O)NN=2)c1	8.05546	-5.55988	2.49757	K4DD	O=C(N(CCCC)C)c1c(O)cc(O)c(C=2N(c3ccccc3)C(=O)NN=2)c1	3.617	105.47	382.42	111.45	0
HSP90	HSP90_SPR_182	SPR	K4DD_db	K4DD_db	-1	HSP	NA	3000222	O=C(N(C)c1ccccc1)c1c(O)cc2[nH]nc(Cc3cc(C)ccc3)c2c1	8.26555	-6.37359	1.91638	K4DD	O=C(N(C)c1ccccc1)c1c(O)cc2[nH]nc(Cc3cc(C)ccc3)c2c1	5.027	69.22	371.44	69.22	0
HSP90	HSP90_SPR_182	SPR	K4DD_db	K4DD_db	-1	HSP	NA	3000223	O=C(N(C)c1ccc(C)cc1)c1c(O)cc2[nH]nc(Cc3cc(C)ccc3)c2c1	8.05084	-5.76585	2.28266	K4DD	O=C(N(C)c1ccc(C)cc1)c1c(O)cc2[nH]nc(Cc3cc(C)ccc3)c2c1	5.325	69.22	385.467	69.22	0
HSP90	HSP90_SPR_182	SPR	K4DD_db	K4DD_db	-1	HSP	NA	3000224	O=C(N(C)c1cc2OCOc2cc1)c1c(O)cc2[nH]nc(Cc3cc(C)ccc3)c2c1	8.21018	-6.15024	2.06699	K4DD	O=C(N(C)c1cc2OCOc2cc1)c1c(O)cc2[nH]nc(Cc3cc(C)ccc3)c2c1	4.732	87.68	415.449	87.68	0
HSP90	HSP90_SPR_182	SPR	K4DD_db	K4DD_db	-1	HSP	NA	3000225	O=C(N(C)c1ccc(N2CCOCC2)cc1)c1c(O)cc2[nH]nc(Cc3cc(C)ccc3)c2c1	8.62045	-5.72583	2.89768	K4DD	O=C(N(C)c1ccc(N2CCOCC2)cc1)c1c(O)cc2[nH]nc(Cc3cc(C)ccc3)c2c1	4.508	81.69	456.546	81.69	0
HSP90	HSP90_SPR_182	SPR	K4DD_db	K4DD_db	-1	HSP	NA	3000226	O=C(N(C)c1ccc(N2CCN(C)CC2)cc1)c1c(O)cc2[nH]nc(Cc3cc(C)ccc3)c2c1	8.64042	-5.63822	3.00342	K4DD	O=C(N(C)c1ccc(N2CCN(C)CC2)cc1)c1c(O)cc2[nH]nc(Cc3cc(C)ccc3)c2c1	4.467	75.7	469.589	75.7	0
HSP90	HSP90_SPR_182	SPR	K4DD_db	K4DD_db	-1	HSP	NA	3000227	O=C(N(C)c1ccc(N2C(=O)COCC2)cc1)c1c(O)cc2[nH]nc(Cc3cc(C)ccc3)c2c1	9.3788	-6.06608	3.31267	K4DD	O=C(N(C)c1ccc(N2C(=O)COCC2)cc1)c1c(O)cc2[nH]nc(Cc3cc(C)ccc3)c2c1	3.955	98.76	470.529	98.76	0
HSP90	HSP90_SPR_182	SPR	K4DD_db	K4DD_db	-1	HSP	NA	3000228	O=C(N(C)c1ccc(N(C)C)cc1)c1c(O)cc2[nH]nc(Cc3cc(C)ccc3)c2c1	8.16294	-5.72107	2.44277	K4DD	O=C(N(C)c1ccc(N(C)C)cc1)c1c(O)cc2[nH]nc(Cc3cc(C)ccc3)c2c1	4.942	72.46	414.509	72.46	0
HSP90	HSP90_SPR_182	SPR	K4DD_db	K4DD_db	-1	HSP	NA	3000229	O=C(N(C)c1ccc(N2CCNCC2)cc1)c1c(O)cc2[nH]nc(Cc3cc(C)ccc3)c2c1	8.29945	-5.48823	2.82732	K4DD	O=C(N(C)c1ccc(N2CCNCC2)cc1)c1c(O)cc2[nH]nc(Cc3cc(C)ccc3)c2c1	4.199	84.49	455.562	84.49	0
HSP90	HSP90_SPR_182	SPR	K4DD_db	K4DD_db	-1	HSP	NA	3000231	Fc1c(F)cc(c(Cc2[nH]nnn2)c1)-c1cc2c(C(=O)N3Cc4c(cccc4)C3)nc(N)nc2cc1	7.95982	-5.37761	2.58692	K4DD	Fc1c(F)cc(c(Cc2[nH]nnn2)c1)-c1cc2c(C(=O)N3Cc4c(cccc4)C3)nc(N)nc2cc1	3.382	126.57	484.47	126.57	0
IGF1R	IGF-1_SPR_129	SPR	K4DD_db	K4DD_db	-1	Kinase	NA	1037723	O(Cc1ccccc1)c1cc(-c2c3c(N)ncnc3n(C3CC(CN4CCC4)C3)c2)ccc1	6.53018	-5.80026	0.738341	K4DD	O(Cc1ccccc1)c1cc(-c2c3c(N)ncnc3n(C3CC(CN4CCC4)C3)c2)ccc1	4.877	69.2	439.563	69.2	0
IGF1R	IGF-1_SPR_129	SPR	K4DD_db	K4DD_db	-1	Kinase	NA	1117888	S(=O)(=O)(C(F)(F)F)c1ccc(N2C(=O)N(Cc3c4c(ncc3)cccc4)C(C)C2=O)cc1	5.76574	-3.06633	2.5157	K4DD	S(=O)(=O)(C(F)(F)F)c1ccc(N2C(=O)N(Cc3c4c(ncc3)cccc4)C(C)C2=O)cc1	3.82476	87.65	463.436	87.65	0
IGF1R	IGF-1_SPR_129	SPR	K4DD_db	K4DD_db	-1	Kinase	NA	1139440	S(C(F)(F)F)c1ccc(N2C(=O)N(Cc3c4c(ncc3)cccc4)C(C)C2=O)cc1	4.97306	-2.7185	2.24834	K4DD	S(C(F)(F)F)c1ccc(N2C(=O)N(Cc3c4c(ncc3)cccc4)C(C)C2=O)cc1	5.21876	53.51	431.438	53.51	0
IGF1R	IGF-1_SPR_129	SPR	K4DD_db	K4DD_db	-1	Kinase	NA	1139443	S(=O)(=O)(C(F)(F)F)c1ccc(N2C(=O)N(Cc3c4c(ncc3)cccc4)C(C)C2=O)cc1	6.53685	-3.8654	2.69897	K4DD	S(=O)(=O)(C(F)(F)F)c1ccc(N2C(=O)N(Cc3c4c(ncc3)cccc4)C(C)C2=O)cc1	3.82476	87.65	463.436	87.65	0
IGF1R	IGF-1_SPR_129	SPR	K4DD_db	K4DD_db	-1	Kinase	NA	1139455	S(C(F)(F)F)c1ccc(N2C(=O)N(Cc3cc(F)ncc3)C(C)(C)C2=O)cc1	5.03222	-3.17026	1.86487	K4DD	S(C(F)(F)F)c1ccc(N2C(=O)N(Cc3cc(F)ncc3)C(C)(C)C2=O)cc1	4.78876	53.51	413.395	53.51	0
IGF1R	IGF-1_SPR_129	SPR	K4DD_db	K4DD_db	-1	Kinase	NA	1139466	S(C(F)(F)F)c1ccc(N2C(=O)N(Cc3cc(NC)ncc3)C(C)(C)C2=O)cc1	6.43219	-3.36192	3.07075	K4DD	S(C(F)(F)F)c1ccc(N2C(=O)N(Cc3cc(NC)ncc3)C(C)(C)C2=O)cc1	4.28276	65.54	424.447	65.54	0
IGF1R	IGF-1_SPR_129	SPR	K4DD_db	K4DD_db	-1	Kinase	NA	1166760	Clc1c(-c2n3c(nc2)C=CC=C3)nc(Nc2c(OC)cc(N3CC4OC(CN(CCO)C4)C3)cc2)nc1	7.77405	-7.04456	0.715569	K4DD	Clc1c(-c2n3c(nc2)C=CC=C3)nc(Nc2c(OC)cc(N3CC4OC(CN(CCO)C4)C3)cc2)nc1	1.33753	100.8	522.009	100.28	0
IGF1R	IGF-1_SPR_129	SPR	K4DD_db	K4DD_db	-1	Kinase	NA	1317525	OC1(C)CC(c2n3c(c(-c4cc5nc(-c6ccccc6)ccc5cc4)n2)C(N)=NC=C3)C1	7.25337	-4.95037	2.35605	K4DD	OC1(C)CC(c2n3c(c(-c4cc5nc(-c6ccccc6)ccc5cc4)n2)C(N)=NC=C3)C1	3.405	89.32	421.504	89.33	0
IGF1R	IGF-1_SPR_129	SPR	K4DD_db	K4DD_db	-1	Kinase	NA	1449197	Brc1c(O)c(C(C)(C)C)cc(C=C(C#N)C#N)c1	7.15027	-5.60959	1.54288	K4DD	Brc1c(O)c(C(C)(C)C)cc(C=C(C#N)C#N)c1	3.675	67.81	305.175	67.81	0
IGF1R	IGF-1_SPR_129	SPR	K4DD_db	K4DD_db	-1	Kinase	NA	3000082	Clc1c(-c2n3c(nc2)C=CC=C3)nc(Nc2c(OC)ccc(N3CCN(C(=O)CN(C)C)CC3)c2)nc1	6.56872	-6.1372	0.428874	K4DD	Clc1c(-c2n3c(nc2)C=CC=C3)nc(Nc2c(OC)ccc(N3CCN(C(=O)CN(C)C)CC3)c2)nc1	1.54753	91.65	521.025	91.13	0
IGF1R	IGF-1_SPR_129	SPR	K4DD_db	K4DD_db	-1	Kinase	NA	3000083	Clc1c(-c2c3n(nc2)C=CC=C3)nc(Nc2c(OC)ccc(N3CCN(C(=O)CNC)CC3)c2)nc1	6.92812	-6.05587	0.870471	K4DD	Clc1c(-c2c3n(nc2)C=CC=C3)nc(Nc2c(OC)ccc(N3CCN(C(=O)CNC)CC3)c2)nc1	0.899	100.44	506.998	99.92	0
IGF1R	IGF-1_SPR_129	SPR	K4DD_db	K4DD_db	-1	Kinase	NA	3000084	O=C(CN(C)C)N1c2c(cc(OC)c(Nc3nc(c(C)cn3)-c3c4n(nc3)C=CC=C4)c2)CC1	7.59688	-6.29743	1.2986	K4DD	O=C(CN(C)C)N1c2c(cc(OC)c(Nc3nc(c(C)cn3)-c3c4n(nc3)C=CC=C4)c2)CC1	1.291	88.41	457.538	87.89	0
IGF1R	IGF-1_SPR_129	SPR	K4DD_db	K4DD_db	-1	Kinase	NA	3000085	Clc1c(-c2c3n(nc2)C=CC=C3)nc(Nc2c(OC)cc3c(N(C(=O)C)CC3)c2)nc1	6.82391	-5.45317	1.36577	K4DD	Clc1c(-c2c3n(nc2)C=CC=C3)nc(Nc2c(OC)cc3c(N(C(=O)C)CC3)c2)nc1	1.834	85.17	434.887	84.65	0
IGF1R	IGF-1_SPR_129	SPR	K4DD_db	K4DD_db	-1	Kinase	NA	3000086	O(C)c1c(Nc2nc(c(C)cn2)-c2c3n(nc2)C=CC=C3)ccc(N2CCNCC2)c1	7.26516	-6.41531	0.845728	K4DD	O(C)c1c(Nc2nc(c(C)cn2)-c2c3n(nc2)C=CC=C3)ccc(N2CCNCC2)c1	1.281	80.13	415.501	79.61	0
IGF1R	IGF-1_SPR_129	SPR	K4DD_db	K4DD_db	-1	Kinase	NA	3000087	Fc1c(-c2c3n(nc2)C=CC=C3)nc(Nc2c(OC)cc(N3CCN(C(=O)CNC)CC3)cc2)nc1	7.53484	-6.50779	1.02556	K4DD	Fc1c(-c2c3n(nc2)C=CC=C3)nc(Nc2c(OC)cc(N3CCN(C(=O)CNC)CC3)cc2)nc1	0.46	100.44	490.543	99.92	0
IGF1R	IGF-1_SPR_129	SPR	K4DD_db	K4DD_db	-1	Kinase	NA	3000088	Clc1c(-c2n3c(C(F)=CC=C3)nc2)nc(Nc2c(OC)ccc(NC(=O)CN(C)C)c2)nc1	7.39158	-6.42919	0.961936	K4DD	Clc1c(-c2n3c(C(F)=CC=C3)nc2)nc(Nc2c(OC)ccc(NC(=O)CN(C)C)c2)nc1	2.05753	97.2	469.908	96.68	0
IGF1R	IGF-1_SPR_129	SPR	K4DD_db	K4DD_db	-1	Kinase	NA	3000089	Clc1c(-c2n3c(nc2)C=CC=C3)nc(Nc2c(OC)cc(C3CCN(C(=O)CNC)CC3)cc2)nc1	7.7841	-6.47625	1.28781	K4DD	Clc1c(-c2n3c(nc2)C=CC=C3)nc(Nc2c(OC)cc(C3CCN(C(=O)CNC)CC3)cc2)nc1	2.36553	97.2	506.01	96.68	0
IGF1R	IGF-1_SPR_129	SPR	K4DD_db	K4DD_db	-1	Kinase	NA	3000091	O(C)c1c(Nc2nc(c(C)cn2)-c2c3n(nc2)C=CC=C3)cc(N2CCNCC2)cc1	6.57243	-6.08273	0.489321	K4DD	O(C)c1c(Nc2nc(c(C)cn2)-c2c3n(nc2)C=CC=C3)cc(N2CCNCC2)cc1	1.281	80.13	415.501	79.61	0
IGF1R	IGF-1_SPR_129	SPR	K4DD_db	K4DD_db	-1	Kinase	NA	3000092	O(C)c1c2c(nc(-c3ccccc3)c1)cc(-c1nc(C3CC(O)(C)C3)n3c1C(N)=NC=C3)cc2	7.86107	-4.24291	3.69443	K4DD	O(C)c1c2c(nc(-c3ccccc3)c1)cc(-c1nc(C3CC(O)(C)C3)n3c1C(N)=NC=C3)cc2	3.396	98.55	451.53	98.56	0
IGF1R	IGF-1_SPR_129	SPR	K4DD_db	K4DD_db	-1	Kinase	NA	3000093	O(C(C)C)c1c2c(nc(-c3ccccc3)c1)cc(-c1nc(C3CC(O)(C)C3)n3c1C(N)=NC=C3)cc2	7.08576	-3.99974	3.15475	K4DD	O(C(C)C)c1c2c(nc(-c3ccccc3)c1)cc(-c1nc(C3CC(O)(C)C3)n3c1C(N)=NC=C3)cc2	4.199	98.55	479.584	98.56	0
IGF1R	IGF-1_SPR_129	SPR	K4DD_db	K4DD_db	-1	Kinase	NA	413409	O(Cc1ccccc1)c1cc(-c2c3c(N)ncnc3n(C3CC(CN4CCCC4)C3)c2)ccc1	7.07988	-6.46165	0.619789	K4DD	O(Cc1ccccc1)c1cc(-c2c3c(N)ncnc3n(C3CC(CN4CCCC4)C3)c2)ccc1	5.319	69.2	453.59	69.2	0
IGF1R	IGF-1_SPR_129	SPR	K4DD_db	K4DD_db	-1	Kinase	NA	424433	Clc1cc(C(O)CNC2=C(c3[nH]c4c(c(C)cc(N5CCOCC5)c4)n3)C(=O)NC=C2)ccc1	7.46092	-5.55206	1.91186	K4DD	Clc1cc(C(O)CNC2=C(c3[nH]c4c(c(C)cc(N5CCOCC5)c4)n3)C(=O)NC=C2)ccc1	2.376	102.51	479.968	106.27	0
IGF1R	IGF-1_SPR_129	SPR	K4DD_db	K4DD_db	-1	Kinase	NA	495436	Fc1c(C(=O)NC)c(Nc2nc(Nc3c(OC)cc4c(N(C(=O)CN(C)C)CC4)c3)nc3[nH]ccc23)ccc1	7.03555	-5.53071	1.50487	K4DD	Fc1c(C(=O)NC)c(Nc2nc(Nc3c(OC)cc4c(N(C(=O)CN(C)C)CC4)c3)nc3[nH]ccc23)ccc1	2.101	127.51	532.58	127.51	0
IGF1R	IGF-1_SPR_129	SPR	K4DD_db	K4DD_db	-1	Kinase	NA	570962	Fc1ncc(NC(=O)C2(C)N(C=3N=C(Nc4[nH]nc(C5CC5)c4)c4n(N=3)ccc4)CCC2)cc1	9.01705	-6.28623	2.79412	K4DD	Fc1ncc(NC(=O)C2(C)N(C=3N=C(Nc4[nH]nc(C5CC5)c4)c4n(N=3)ccc4)CCC2)cc1	3.233	115.59	461.505	116.13	2
D2	D2_28970469	Fluorescent ligand-binding assay	Nat Commun.	Extrapyramidal side effects of antipsychotics are linked to their association kinetics at dopamine D2 receptors	28970469	GPCR	NA	(+)Butaclamol	OC1(C(C)(C)C)CC2N(CC3c4c2cccc4CCc2c3cccc2)CC1	10.37	-7.06	3.36	literature	OC1(C(C)(C)C)CC2N(CC3c4c2cccc4CCc2c3cccc2)CC1	5.528	23.47	361.529	23.47	0
D2	D2_28970469	Fluorescent ligand-binding assay	Nat Commun.	Extrapyramidal side effects of antipsychotics are linked to their association kinetics at dopamine D2 receptors	28970469	GPCR	NA	(-)Sulpiride	S(=O)(=O)(N)c1cc(C(=O)NCC2N(CC)CCC2)c(OC)cc1	7.87	-6.43	1.43	literature	S(=O)(=O)(N)c1cc(C(=O)NCC2N(CC)CCC2)c(OC)cc1	0.495	101.73	341.432	101.73	2
D2	D2_28970469	Fluorescent ligand-binding assay	Nat Commun.	Extrapyramidal side effects of antipsychotics are linked to their association kinetics at dopamine D2 receptors	28970469	GPCR	NA	Amisulpride	S(=O)(=O)(CC)c1c(N)cc(OC)c(C(=O)NCC2N(CC)CCC2)c1	8.61	-6.76	1.86	literature	S(=O)(=O)(CC)c1c(N)cc(OC)c(C(=O)NCC2N(CC)CCC2)c1	1.141	101.73	369.486	101.73	4
D2	D2_28970469	Fluorescent ligand-binding assay	Nat Commun.	Extrapyramidal side effects of antipsychotics are linked to their association kinetics at dopamine D2 receptors	28970469	GPCR	NA	Asenapine	Clc1cc2[C@H]3[C@H](c4c(Oc2cc1)cccc4)CN(C)C3	9.29	-7.56	1.81	literature	Clc1cc2[C@H]3[C@H](c4c(Oc2cc1)cccc4)CN(C)C3	3.548	12.47	285.774	12.47	0
D2	D2_28970469	Fluorescent ligand-binding assay	Nat Commun.	Extrapyramidal side effects of antipsychotics are linked to their association kinetics at dopamine D2 receptors	28970469	GPCR	NA	Chlorpromazine	Clc1cc2N(CCCN(C)C)c3c(Sc2cc1)cccc3	9.24	-7.8	1.44	literature	Clc1cc2N(CCCN(C)C)c3c(Sc2cc1)cccc3	4.624	6.48	318.872	6.48	4
D2	D2_28970469	Fluorescent ligand-binding assay	Nat Commun.	Extrapyramidal side effects of antipsychotics are linked to their association kinetics at dopamine D2 receptors	28970469	GPCR	NA	Clozapine	Clc1cc2NC(N3CCN(C)CC3)=C3C(=Nc2cc1)C=CC=C3	7.69	-6.14	1.56	literature	Clc1cc2NC(N3CCN(C)CC3)=C3C(=Nc2cc1)C=CC=C3	2.834	30.87	326.831	30.87
D2	D2_28970469	Fluorescent ligand-binding assay	Nat Commun.	Extrapyramidal side effects of antipsychotics are linked to their association kinetics at dopamine D2 receptors	28970469	GPCR	NA	Domperidone	Clc1cc2NC(=O)N(C3CCN(CCCN4C(=O)Nc5c4cccc5)CC3)c2cc1	9.83	-7.21	2.63	literature	Clc1cc2NC(=O)N(C3CCN(CCCN4C(=O)Nc5c4cccc5)CC3)c2cc1	2.755	67.92	425.92	78.82	0
D2	D2_28970469	Fluorescent ligand-binding assay	Nat Commun.	Extrapyramidal side effects of antipsychotics are linked to their association kinetics at dopamine D2 receptors	28970469	GPCR	NA	Droperidol	Fc1ccc(C(=O)CCCN2CC=C(N3C(=O)Nc4c3cccc4)CC2)cc1	9.71	-7.53	2.2	literature	Fc1ccc(C(=O)CCCN2CC=C(N3C(=O)Nc4c3cccc4)CC2)cc1	3.122	52.65	379.435	58.1	4
D2	D2_28970469	Fluorescent ligand-binding assay	Nat Commun.	Extrapyramidal side effects of antipsychotics are linked to their association kinetics at dopamine D2 receptors	28970469	GPCR	NA	Flupenthixol	FC(F)(F)c1cc2/C(=C\CCN3CCN(CCO)CC3)/c3c(Sc2cc1)cccc3	9.67	-6.77	2.92	literature	FC(F)(F)c1cc2/C(=C\CCN3CCN(CCO)CC3)/c3c(Sc2cc1)cccc3	4.25076	26.71	434.526	26.71	2
D2	D2_28970469	Fluorescent ligand-binding assay	Nat Commun.	Extrapyramidal side effects of antipsychotics are linked to their association kinetics at dopamine D2 receptors	28970469	GPCR	NA	Fluphenazine	FC(F)(F)c1cc2N(CCCN3CCN(CCO)CC3)c3c(Sc2cc1)cccc3	10.46	-7.27	3.18	literature	FC(F)(F)c1cc2N(CCCN3CCN(CCO)CC3)c3c(Sc2cc1)cccc3	3.79776	29.95	437.53	29.95	0
D2	D2_28970469	Fluorescent ligand-binding assay	Nat Commun.	Extrapyramidal side effects of antipsychotics are linked to their association kinetics at dopamine D2 receptors	28970469	GPCR	NA	Haloperidol	Clc1ccc(C2(O)CCN(CCCC(=O)c3ccc(F)cc3)CC2)cc1	9.49	-7.55	1.97	literature	Clc1ccc(C2(O)CCN(CCCC(=O)c3ccc(F)cc3)CC2)cc1	4.598	40.54	375.871	40.54	0
D2	D2_28970469	Fluorescent ligand-binding assay	Nat Commun.	Extrapyramidal side effects of antipsychotics are linked to their association kinetics at dopamine D2 receptors	28970469	GPCR	NA	Loxapine	Clc1cc2C(N3CCN(C)CC3)=Nc3c(Oc2cc1)cccc3	8.25	-6.83	1.45	literature	Clc1cc2C(N3CCN(C)CC3)=Nc3c(Oc2cc1)cccc3	3.303	28.07	327.815	28.07	4
D2	D2_28970469	Fluorescent ligand-binding assay	Nat Commun.	Extrapyramidal side effects of antipsychotics are linked to their association kinetics at dopamine D2 receptors	28970469	GPCR	NA	Melperone	Fc1ccc(C(=O)CCCN2CCC(C)CC2)cc1	7.11	-5.52	1.61	literature	Fc1ccc(C(=O)CCCN2CCC(C)CC2)cc1	3.525	20.31	263.356	20.31	3
D2	D2_28970469	Fluorescent ligand-binding assay	Nat Commun.	Extrapyramidal side effects of antipsychotics are linked to their association kinetics at dopamine D2 receptors	28970469	GPCR	NA	Molindone	O=C1C(CN2CCOCC2)CCc2[nH]c(C)c(CC)c12	7.69	-6.16	1.55	literature	O=C1C(CN2CCOCC2)CCc2[nH]c(C)c(CC)c12	1.128	45.33	276.38	45.33	4
D2	D2_28970469	Fluorescent ligand-binding assay	Nat Commun.	Extrapyramidal side effects of antipsychotics are linked to their association kinetics at dopamine D2 receptors	28970469	GPCR	NA	Nemonapride	Clc1c(NC)cc(OC)c(C(=O)N[C@H]2[C@@H](C)N(Cc3ccccc3)CC2)c1	10.91	-7.38	3.52	literature	Clc1c(NC)cc(OC)c(C(=O)N[C@H]2[C@@H](C)N(Cc3ccccc3)CC2)c1	3.808	53.6	387.911	53.6	0
D2	D2_28970469	Fluorescent ligand-binding assay	Nat Commun.	Extrapyramidal side effects of antipsychotics are linked to their association kinetics at dopamine D2 receptors	28970469	GPCR	NA	Olanzapine	CN1CCN(C=2Nc3c(N=C4SC(C)=CC=24)cccc3)CC1	8.17	-6.47	1.73	literature	CN1CCN(C=2Nc3c(N=C4SC(C)=CC=24)cccc3)CC1	2.654	30.87	312.441	30.87
D2	D2_28970469	Fluorescent ligand-binding assay	Nat Commun.	Extrapyramidal side effects of antipsychotics are linked to their association kinetics at dopamine D2 receptors	28970469	GPCR	NA	Paliperidone	Fc1cc2onc(C3CCN(CCC=4C(=O)N5C(C(O)CCC5)=NC=4C)CC3)c2cc1	8.6	-6.48	2.13	literature	Fc1cc2onc(C3CCN(CCC=4C(=O)N5C(C(O)CCC5)=NC=4C)CC3)c2cc1	2.135	82.17	426.492	84.39	0
D2	D2_28970469	Fluorescent ligand-binding assay	Nat Commun.	Extrapyramidal side effects of antipsychotics are linked to their association kinetics at dopamine D2 receptors	28970469	GPCR	NA	Perphenazine	Clc1cc2N(CCCN3CCN(CCO)CC3)c3c(Sc2cc1)cccc3	9.73	-7.33	2.42	literature	Clc1cc2N(CCCN3CCN(CCO)CC3)c3c(Sc2cc1)cccc3	3.455	29.95	403.978	29.95	4
D2	D2_28970469	Fluorescent ligand-binding assay	Nat Commun.	Extrapyramidal side effects of antipsychotics are linked to their association kinetics at dopamine D2 receptors	28970469	GPCR	NA	Quetiapine	O(CCO)CCN1CCN(C2=Nc3c(Sc4c2cccc4)cccc3)CC1	6.82	-5.04	1.77	literature	O(CCO)CCN1CCN(C2=Nc3c(Sc4c2cccc4)cccc3)CC1	2.534	48.3	383.516	48.3	4
D2	D2_28970469	Fluorescent ligand-binding assay	Nat Commun.	Extrapyramidal side effects of antipsychotics are linked to their association kinetics at dopamine D2 receptors	28970469	GPCR	NA	Raclopride	Clc1c(OC)c(C(=O)NC[C@@H]2N(CC)CCC2)c(O)c(Cl)c1	9.08	-7.05	2.05	literature	Clc1c(OC)c(C(=O)NC[C@@H]2N(CC)CCC2)c(O)c(Cl)c1	2.937	61.8	347.242	61.8	0
D2	D2_28970469	Fluorescent ligand-binding assay	Nat Commun.	Extrapyramidal side effects of antipsychotics are linked to their association kinetics at dopamine D2 receptors	28970469	GPCR	NA	Remoxipride	Brc1c(OC)c(C(=O)NC[C@H]2N(CC)CCC2)c(OC)cc1	6.79	-5.29	1.5	literature	Brc1c(OC)c(C(=O)NC[C@H]2N(CC)CCC2)c(OC)cc1	2.78	50.8	371.275	50.8	0
D2	D2_28970469	Fluorescent ligand-binding assay	Nat Commun.	Extrapyramidal side effects of antipsychotics are linked to their association kinetics at dopamine D2 receptors	28970469	GPCR	NA	Risperidone	Fc1cc2onc(C3CCN(CCC=4C(=O)N5C(=NC=4C)CCCC5)CC3)c2cc1	9.05	-6.86	2.14	literature	Fc1cc2onc(C3CCN(CCC=4C(=O)N5C(=NC=4C)CCCC5)CC3)c2cc1	2.796	61.94	410.493	64.16	4
D2	D2_28970469	Fluorescent ligand-binding assay	Nat Commun.	Extrapyramidal side effects of antipsychotics are linked to their association kinetics at dopamine D2 receptors	28970469	GPCR	NA	Sertindole	Clc1cc2c(C3CCN(CCN4C(=O)NCC4)CC3)cn(-c3ccc(F)cc3)c2cc1	8.92	-6.91	2.01	literature	Clc1cc2c(C3CCN(CCN4C(=O)NCC4)CC3)cn(-c3ccc(F)cc3)c2cc1	4.366	40.51	440.95	40.51	4
D2	D2_28970469	Fluorescent ligand-binding assay	Nat Commun.	Extrapyramidal side effects of antipsychotics are linked to their association kinetics at dopamine D2 receptors	28970469	GPCR	NA	Spiperone	Fc1ccc(C(=O)CCCN2CCC3(N(c4ccccc4)CNC3=O)CC2)cc1	10.84	-7.63	3.2	literature	Fc1ccc(C(=O)CCCN2CCC3(N(c4ccccc4)CNC3=O)CC2)cc1	3.328	52.65	395.478	52.65	0
D2	D2_28970469	Fluorescent ligand-binding assay	Nat Commun.	Extrapyramidal side effects of antipsychotics are linked to their association kinetics at dopamine D2 receptors	28970469	GPCR	NA	Thioridazine	S(C)c1cc2N(CCC3N(C)CCCC3)c3c(Sc2cc1)cccc3	9.21	-7.6	1.63	literature	S(C)c1cc2N(CCC3N(C)CCCC3)c3c(Sc2cc1)cccc3	5.719	6.48	370.585	6.48	0
D2	D2_28970469	Fluorescent ligand-binding assay	Nat Commun.	Extrapyramidal side effects of antipsychotics are linked to their association kinetics at dopamine D2 receptors	28970469	GPCR	NA	Trifluoperazine	FC(F)(F)c1cc2N(CCCN3CCN(C)CC3)c3c(Sc2cc1)cccc3	9.69	-7.26	2.44	literature	FC(F)(F)c1cc2N(CCCN3CCN(C)CC3)c3c(Sc2cc1)cccc3	4.49176	9.72	407.504	9.72	4
D2	D2_28970469	Fluorescent ligand-binding assay	Nat Commun.	Extrapyramidal side effects of antipsychotics are linked to their association kinetics at dopamine D2 receptors	28970469	GPCR	NA	Ziprasidone	Clc1c(CCN2CCN(c3nsc4c3cccc4)CC2)cc2c(NC(=O)C2)c1	9.19	-7.43	1.75	literature	Clc1c(CCN2CCN(c3nsc4c3cccc4)CC2)cc2c(NC(=O)C2)c1	3.938	48.47	412.945	48.47	0
D2	D2_28970469	Fluorescent ligand-binding assay	Nat Commun.	Extrapyramidal side effects of antipsychotics are linked to their association kinetics at dopamine D2 receptors	28970469	GPCR	NA	Zotepine	Clc1cc2C(OCCN(C)C)=Cc3c(Sc2cc1)cccc3	8.76	-7.18	1.63	literature	Clc1cc2C(OCCN(C)C)=Cc3c(Sc2cc1)cccc3	5.325	12.47	331.867	12.47	4
ABL	ABL_30362749	Fluorescent ligand-binding assay	J Am Chem Soc.	Binding Kinetics Survey of the Drugged Kinome	30362749	Kinase	NA	AG-1024	Brc1c(O)c(C(C)(C)C)cc(C=C(C#N)C#N)c1	6.25	-5.63	0.65	literature	Brc1c(O)c(C(C)(C)C)cc(C=C(C#N)C#N)c1	3.675	67.81	305.175	67.81	0
ABL	ABL_30362749	Fluorescent ligand-binding assay	J Am Chem Soc.	Binding Kinetics Survey of the Drugged Kinome	30362749	Kinase	NA	AG-1478 (Tyrphostin AG-1478)	Clc1cc(Nc2ncnc3c2cc(OC)c(OC)c3)ccc1	6.59	-5.89	0.71	literature	Clc1cc(Nc2ncnc3c2cc(OC)c(OC)c3)ccc1	3.11374	56.27	315.76	56.27	0
ABL	ABL_30362749	Fluorescent ligand-binding assay	J Am Chem Soc.	Binding Kinetics Survey of the Drugged Kinome	30362749	Kinase	NA	AMG 900	O(c1c(-c2nc(N)ncc2)cccn1)c1ccc(Nc2nnc(-c3scc(C)c3)c3c2cccc3)cc1	6.01	-4.71	1.38	literature	O(c1c(-c2nc(N)ncc2)cccn1)c1ccc(Nc2nnc(-c3scc(C)c3)c3c2cccc3)cc1	5.723	111.73	503.59	111.73	1
ABL	ABL_30362749	Fluorescent ligand-binding assay	J Am Chem Soc.	Binding Kinetics Survey of the Drugged Kinome	30362749	Kinase	NA	AMG458	O=C(Nc1ncc(Oc2c3c(ncc2)cc(OC)cc3)cc1)C=1C(=O)N(N(CC(O)(C)C)C=1C)c1ccccc1	6.69	-4.92	1.83	literature	O=C(Nc1ncc(Oc2c3c(ncc2)cc(OC)cc3)cc1)C=1C(=O)N(N(CC(O)(C)C)C=1C)c1ccccc1	3.265	117.12	539.592	120.5	0
ABL	ABL_30362749	Fluorescent ligand-binding assay	J Am Chem Soc.	Binding Kinetics Survey of the Drugged Kinome	30362749	Kinase	NA	AT9283	O=C(Nc1c(-c2[nH]c3c(n2)cc(CN2CCOCC2)cc3)n[nH]c1)NC1CC1	7.88	-7.35	0.43	literature	O=C(Nc1c(-c2[nH]c3c(n2)cc(CN2CCOCC2)cc3)n[nH]c1)NC1CC1	1.13706	110.96	381.44	110.96
ABL	ABL_30362749	Fluorescent ligand-binding assay	J Am Chem Soc.	Binding Kinetics Survey of the Drugged Kinome	30362749	Kinase	NA	AZ628	O=C(Nc1cc(Nc2cc3C(=O)N(C)C=Nc3cc2)c(C)cc1)c1cc(C(C#N)(C)C)ccc1	6.9	-5.3	1.63	literature	O=C(Nc1cc(Nc2cc3C(=O)N(C)C=Nc3cc2)c(C)cc1)c1cc(C(C#N)(C)C)ccc1	4.957	97.59	451.53	99.81	0
ABL	ABL_30362749	Fluorescent ligand-binding assay	J Am Chem Soc.	Binding Kinetics Survey of the Drugged Kinome	30362749	Kinase	NA	AZD4547	O=C(Nc1n[nH]c(CCc2cc(OC)cc(OC)c2)c1)c1ccc(N2C[C@@H](C)N[C@@H](C)C2)cc1	6.72	-5.93	0.88	literature	O=C(Nc1n[nH]c(CCc2cc(OC)cc(OC)c2)c1)c1ccc(N2C[C@@H](C)N[C@@H](C)C2)cc1	3.948	91.51	463.582	91.51	2
ABL	ABL_30362749	Fluorescent ligand-binding assay	J Am Chem Soc.	Binding Kinetics Survey of the Drugged Kinome	30362749	Kinase	NA	AZD7762	Fc1cc(-c2sc(C(=O)N[C@@H]3CNCCC3)c(NC(=O)N)c2)ccc1	7.88	-7.25	0.64	literature	Fc1cc(-c2sc(C(=O)N[C@@H]3CNCCC3)c(NC(=O)N)c2)ccc1	1.64	96.25	362.429	96.25	0
ABL	ABL_30362749	Fluorescent ligand-binding assay	J Am Chem Soc.	Binding Kinetics Survey of the Drugged Kinome	30362749	Kinase	NA	AZD8931	Clc1c(F)c(Nc2ncnc3c2cc(OC2CCN(CC(=O)NC)CC2)c(OC)c3)ccc1	6.3	-5.5	0.77	literature	Clc1c(F)c(Nc2ncnc3c2cc(OC2CCN(CC(=O)NC)CC2)c(OC)c3)ccc1	2.88274	88.61	473.936	88.61	2
ABL	ABL_30362749	Fluorescent ligand-binding assay	J Am Chem Soc.	Binding Kinetics Survey of the Drugged Kinome	30362749	Kinase	NA	Afatinib (BIBW2992)	Clc1c(F)ccc(Nc2ncnc3c2cc(NC(=O)/C=C/CN(C)C)c(O[C@@H]2COCC2)c3)c1	5.99	-5.57	0.42	literature	Clc1c(F)ccc(Nc2ncnc3c2cc(NC(=O)/C=C/CN(C)C)c(O[C@@H]2COCC2)c3)c1	3.372	88.61	485.947	88.61	0
ABL	ABL_30362749	Fluorescent ligand-binding assay	J Am Chem Soc.	Binding Kinetics Survey of the Drugged Kinome	30362749	Kinase	NA	Apatinib (YN968D1)	S(=O)(=O)([O-])C.O=C(Nc1ccc(C2(C#N)CCCC2)cc1)c1c([N+H2]c2c(C)ccnc2)nccc1	5.25	-4.94	0.41	literature	O=C(Nc1ccc(C2(C#N)CCCC2)cc1)c1c(Nc2c(C)ccnc2)nccc1	3.989	90.7	397.482	90.7
ABL	ABL_30362749	Fluorescent ligand-binding assay	J Am Chem Soc.	Binding Kinetics Survey of the Drugged Kinome	30362749	Kinase	NA	Aurora A Inhibitor I	Clc1c(NC(=O)c2ccc(Nc3c(F)cnc(Nc4ccc(CC(=O)N5CCN(CC)CC5)cc4)n3)cc2)cccc1	6.87	-5.22	0.76	literature	Clc1c(NC(=O)c2ccc(Nc3c(F)cnc(Nc4ccc(CC(=O)N5CCN(CC)CC5)cc4)n3)cc2)cccc1	4.209	102.49	588.087	102.49	0
ABL	ABL_30362749	Fluorescent ligand-binding assay	J Am Chem Soc.	Binding Kinetics Survey of the Drugged Kinome	30362749	Kinase	NA	Axitinib	S(c1c(C(=O)NC)cccc1)c1cc2[nH]nc(/C=C/c3ncccc3)c2cc1	8.02	-6.79	1.22	literature	S(c1c(C(=O)NC)cccc1)c1cc2[nH]nc(/C=C/c3ncccc3)c2cc1	4.643	70.67	386.479	70.67	0
ABL	ABL_30362749	Fluorescent ligand-binding assay	J Am Chem Soc.	Binding Kinetics Survey of the Drugged Kinome	30362749	Kinase	NA	BGJ398 (NVP-BGJ398)	Clc1c(NC(=O)N(C)c2ncnc(Nc3ccc(N4CCN(CC)CC4)cc3)c2)c(Cl)c(OC)cc1OC	6.02	-4.56	1.41	literature	Clc1c(NC(=O)N(C)c2ncnc(Nc3ccc(N4CCN(CC)CC4)cc3)c2)c(Cl)c(OC)cc1OC	3.451	95.09	560.486	95.09	3
ABL	ABL_30362749	Fluorescent ligand-binding assay	J Am Chem Soc.	Binding Kinetics Survey of the Drugged Kinome	30362749	Kinase	NA	BIBF1120 (Vargatef)	O=C(N(C)c1ccc(N/C(/c2ccccc2)=C/2\C(=O)Nc3c\2ccc(C(=O)OC)c3)cc1)CN1CCN(C)CC1	8.06	-6.92	1.19	literature	O=C(N(C)c1ccc(N/C(/c2ccccc2)=C/2\C(=O)Nc3c\2ccc(C(=O)OC)c3)cc1)CN1CCN(C)CC1	3.507	94.22	539.636	94.22	0
ABL	ABL_30362749	Fluorescent ligand-binding assay	J Am Chem Soc.	Binding Kinetics Survey of the Drugged Kinome	30362749	Kinase	NA	BIX 02188	O=C(N)c1cc2NC(=O)/C(=C(\Nc3cc(CN(C)C)ccc3)/c3ccccc3)/c2cc1	5.81	-5.19	0.61	literature	O=C(N)c1cc2NC(=O)/C(=C(\Nc3cc(CN(C)C)ccc3)/c3ccccc3)/c2cc1	3.831	87.46	412.493	87.46	0
ABL	ABL_30362749	Fluorescent ligand-binding assay	J Am Chem Soc.	Binding Kinetics Survey of the Drugged Kinome	30362749	Kinase	NA	BIX 02189	O=C(N(C)C)c1cc2NC(=O)/C(=C(\Nc3cc(CN(C)C)ccc3)/c3ccccc3)/c2cc1	5.6	-4.86	0.74	literature	O=C(N(C)C)c1cc2NC(=O)/C(=C(\Nc3cc(CN(C)C)ccc3)/c3ccccc3)/c2cc1	4.384	64.68	440.547	64.68	0
ABL	ABL_30362749	Fluorescent ligand-binding assay	J Am Chem Soc.	Binding Kinetics Survey of the Drugged Kinome	30362749	Kinase	NA	BMS 777607	Clc1c(N)nccc1Oc1c(F)cc(NC(=O)C=2C(=O)N(c3ccc(F)cc3)C=CC=2OCC)cc1	6.99	-5.34	1.66	literature	Clc1c(N)nccc1Oc1c(F)cc(NC(=O)C=2C(=O)N(c3ccc(F)cc3)C=CC=2OCC)cc1	3.964	106.78	512.9	108.47	2
ABL	ABL_30362749	Fluorescent ligand-binding assay	J Am Chem Soc.	Binding Kinetics Survey of the Drugged Kinome	30362749	Kinase	NA	BMS 794833	Clc1c(N)nccc1Oc1c(F)cc(NC(=O)C=2C(=O)C(c3ccc(F)cc3)=CNC=2)cc1	6.61	-4.67	1.95	literature	Clc1c(N)nccc1Oc1c(F)cc(NC(=O)C=2C(=O)C(c3ccc(F)cc3)=CNC=2)cc1	3.076	106.34	468.847	110.1	0
ABL	ABL_30362749	Fluorescent ligand-binding assay	J Am Chem Soc.	Binding Kinetics Survey of the Drugged Kinome	30362749	Kinase	NA	BX-912	Brc1c(NCCc2[nH]cnc2)nc(Nc2cc(NC(=O)N3CCCC3)ccc2)nc1	6.94	-6.15	0.8	literature	Brc1c(NCCc2[nH]cnc2)nc(Nc2cc(NC(=O)N3CCCC3)ccc2)nc1	1.234	110.86	471.363	110.86	0
ABL	ABL_30362749	Fluorescent ligand-binding assay	J Am Chem Soc.	Binding Kinetics Survey of the Drugged Kinome	30362749	Kinase	NA	Barasertib (AZD1152-HQPA)	P(=O)(OCCN(CCCOc1cc2ncnc(Nc3[nH]nc(CC(=O)Nc4cc(F)ccc4)c3)c2cc1)CC)(O)O	6.33	-5.4	1.43	literature	P(=O)(OCCN(CCCOc1cc2ncnc(Nc3[nH]nc(CC(=O)Nc4cc(F)ccc4)c3)c2cc1)CC)(O)O	1.886	174.82	587.549	174.82
ABL	ABL_30362749	Fluorescent ligand-binding assay	J Am Chem Soc.	Binding Kinetics Survey of the Drugged Kinome	30362749	Kinase	NA	Brivanib (BMS-540215)	Fc1c(OC2=NC=Nn3c2c(C)c(OC[C@H](O)C)c3)ccc2[nH]c(C)cc12	6.67	-5.94	0.76	literature	Fc1c(OC2=NC=Nn3c2c(C)c(OC[C@H](O)C)c3)ccc2[nH]c(C)cc12	3.21	84.13	370.384	84.67	0
ABL	ABL_30362749	Fluorescent ligand-binding assay	J Am Chem Soc.	Binding Kinetics Survey of the Drugged Kinome	30362749	Kinase	NA	Brivanib alaninate (BMS-582664) - prodrug	Fc1c(OC2=NC=Nn3c2c(C)c(OC[C@H](OC(=O)[C@@H](N)C)C)c3)ccc2[nH]c(C)cc12	6.83	-6.28	0.47	literature	Fc1c(OC2=NC=Nn3c2c(C)c(OC[C@H](OC(=O)[C@@H](N)C)C)c3)ccc2[nH]c(C)cc12	2.97074	116.22	441.463	116.76	0
ABL	ABL_30362749	Fluorescent ligand-binding assay	J Am Chem Soc.	Binding Kinetics Survey of the Drugged Kinome	30362749	Kinase	NA	CH5424802	O=C1c2c3c([nH]c2C(C)(C)c2c1cc(CC)c(N1CCC(N4CCOCC4)CC1)c2)cc(C#N)cc3	6.36	-6.08	0.3	literature	O=C1c2c3c([nH]c2C(C)(C)c2c1cc(CC)c(N1CCC(N4CCOCC4)CC1)c2)cc(C#N)cc3	5.589	72.36	482.628	72.36	4
ABL	ABL_30362749	Fluorescent ligand-binding assay	J Am Chem Soc.	Binding Kinetics Survey of the Drugged Kinome	30362749	Kinase	NA	CI-1033 (Canertinib)	Clc1c(F)ccc(Nc2ncnc3c2cc(NC(=O)C=C)c(OCCCN2CCOCC2)c3)c1	7.29	-6.54	0.81	literature	Clc1c(F)ccc(Nc2ncnc3c2cc(NC(=O)C=C)c(OCCCN2CCOCC2)c3)c1	3.269	88.61	485.947	88.61	3
ABL	ABL_30362749	Fluorescent ligand-binding assay	J Am Chem Soc.	Binding Kinetics Survey of the Drugged Kinome	30362749	Kinase	NA	CP 673451	O(CCOc1cc2ncn(-c3nc4c(N5CCC(N)CC5)cccc4cc3)c2cc1)C	6.63	-5.32	1.27	literature	O(CCOc1cc2ncn(-c3nc4c(N5CCC(N)CC5)cccc4cc3)c2cc1)C	3.25174	78.43	417.513	78.43	0
ABL	ABL_30362749	Fluorescent ligand-binding assay	J Am Chem Soc.	Binding Kinetics Survey of the Drugged Kinome	30362749	Kinase	NA	Cediranib (AZD2171)	Fc1c(Oc2ncnc3c2cc(OC)c(OCCCN2CCCC2)c3)ccc2[nH]c(C)cc12	7.51	-6.73	0.7	literature	Fc1c(Oc2ncnc3c2cc(OC)c(OCCCN2CCCC2)c3)ccc2[nH]c(C)cc12	4.21274	72.5	450.514	72.5	3
ABL	ABL_30362749	Fluorescent ligand-binding assay	J Am Chem Soc.	Binding Kinetics Survey of the Drugged Kinome	30362749	Kinase	NA	Crenolanib (CP-868596)	O(CC1(C)COC1)c1cc2ncn(-c3nc4c(N5CCC(N)CC5)cccc4cc3)c2cc1	6.4	-5.54	0.86	literature	O(CC1(C)COC1)c1cc2ncn(-c3nc4c(N5CCC(N)CC5)cccc4cc3)c2cc1	3.834	78.43	443.551	78.43	3
ABL	ABL_30362749	Fluorescent ligand-binding assay	J Am Chem Soc.	Binding Kinetics Survey of the Drugged Kinome	30362749	Kinase	NA	Cyt387	O=C(NCC#N)c1ccc(-c2nc(Nc3ccc(N4CCOCC4)cc3)ncc2)cc1	6.28	-5.56	0.71	literature	O=C(NCC#N)c1ccc(-c2nc(Nc3ccc(N4CCOCC4)cc3)ncc2)cc1	1.468	103.17	414.469	103.17	3
ABL	ABL_30362749	Fluorescent ligand-binding assay	J Am Chem Soc.	Binding Kinetics Survey of the Drugged Kinome	30362749	Kinase	NA	Dabrafenib (GSK2118436)	S(=O)(=O)(Nc1c(F)c(-c2c(-c3nc(N)ncc3)sc(C(C)(C)C)n2)ccc1)c1c(F)cccc1F	7.19	-6.28	0.91	literature	S(=O)(=O)(Nc1c(F)c(-c2c(-c3nc(N)ncc3)sc(C(C)(C)C)n2)ccc1)c1c(F)cccc1F	4.291	110.86	519.572	110.86	4
ABL	ABL_30362749	Fluorescent ligand-binding assay	J Am Chem Soc.	Binding Kinetics Survey of the Drugged Kinome	30362749	Kinase	NA	Danusertib (PHA-739358)	O=C([C@H](OC)c1ccccc1)N1Cc2c(NC(=O)c3ccc(N4CCN(C)CC4)cc3)n[nH]c2C1	7.67	-5.86	1.85	literature	O=C([C@H](OC)c1ccccc1)N1Cc2c(NC(=O)c3ccc(N4CCN(C)CC4)cc3)n[nH]c2C1	2.235	93.8	474.565	93.8	0
ABL	ABL_30362749	Fluorescent ligand-binding assay	J Am Chem Soc.	Binding Kinetics Survey of the Drugged Kinome	30362749	Kinase	NA	Desmethyl Erlotinib (CP-473420)	O(CCOc1c(OCCO)cc2c(Nc3cc(C#C)ccc3)ncnc2c1)C	7.17	-5.84	1.36	literature	O(CCOc1c(OCCO)cc2c(Nc3cc(C#C)ccc3)ncnc2c1)C	1.97548	85.73	379.416	85.73	0
ABL	ABL_30362749	Fluorescent ligand-binding assay	J Am Chem Soc.	Binding Kinetics Survey of the Drugged Kinome	30362749	Kinase	NA	Dovitinib (TKI-258)	Fc1c2C(N)=C(c3[nH]c4c(n3)ccc(N3CCN(C)CC3)c4)C(=O)Nc2ccc1	7.53	-6.82	0.68	literature	Fc1c2C(N)=C(c3[nH]c4c(n3)ccc(N3CCN(C)CC3)c4)C(=O)Nc2ccc1	1.59	90.28	392.438	94.04	3
ABL	ABL_30362749	Fluorescent ligand-binding assay	J Am Chem Soc.	Binding Kinetics Survey of the Drugged Kinome	30362749	Kinase	NA	E7080 (Lenvatinib)	Clc1c(NC(=O)NC2CC2)ccc(Oc2c3c(ncc2)cc(OC)c(C(=O)N)c3)c1	6.8	-6.55	0.3	literature	Clc1c(NC(=O)NC2CC2)ccc(Oc2c3c(ncc2)cc(OC)c(C(=O)N)c3)c1	2.902	115.57	426.86	115.57	0
ABL	ABL_30362749	Fluorescent ligand-binding assay	J Am Chem Soc.	Binding Kinetics Survey of the Drugged Kinome	30362749	Kinase	NA	Erlotinib HCl	O(CCOc1c(OCCOC)cc2ncnc(Nc3cc(C#C)ccc3)c2c1)C	7.11	-5.9	1.06	literature	O(CCOc1c(OCCOC)cc2ncnc(Nc3cc(C#C)ccc3)c2c1)C	2.33922	74.73	393.443	74.73	4
ABL	ABL_30362749	Fluorescent ligand-binding assay	J Am Chem Soc.	Binding Kinetics Survey of the Drugged Kinome	30362749	Kinase	NA	Foretinib (GSK1363089 - XL880)	Fc1c(Oc2c3c(ncc2)cc(OCCCN2CCOCC2)c(OC)c3)ccc(NC(=O)C2(C(=O)Nc3ccc(F)cc3)CC2)c1	7.97	-6.03	1.97	literature	Fc1c(Oc2c3c(ncc2)cc(OCCCN2CCOCC2)c(OC)c3)ccc(NC(=O)C2(C(=O)Nc3ccc(F)cc3)CC2)c1	4.59374	111.25	632.664	111.25	2
ABL	ABL_30362749	Fluorescent ligand-binding assay	J Am Chem Soc.	Binding Kinetics Survey of the Drugged Kinome	30362749	Kinase	NA	GDC-0980 (RG7422)	O=C([C@@H](O)C)N1CCN(Cc2c(C)c3nc(-c4cnc(N)nc4)nc(N4CCOCC4)c3s2)CC1	6.09	-5.06	1	literature	O=C([C@@H](O)C)N1CCN(Cc2c(C)c3nc(-c4cnc(N)nc4)nc(N4CCOCC4)c3s2)CC1	-1.016	133.83	498.612	133.83	2
ABL	ABL_30362749	Fluorescent ligand-binding assay	J Am Chem Soc.	Binding Kinetics Survey of the Drugged Kinome	30362749	Kinase	NA	GSK1070916	O=C(N(C)C)Nc1ccc(-c2c(-c3c4c([nH]c(-c5cc(CN(C)C)ccc5)c4)ncc3)cn(CC)n2)cc1	6.53	-5.48	1.05	literature	O=C(N(C)C)Nc1ccc(-c2c(-c3c4c([nH]c(-c5cc(CN(C)C)ccc5)c4)ncc3)cn(CC)n2)cc1	4.46	82.08	507.642	82.08	1
ABL	ABL_30362749	Fluorescent ligand-binding assay	J Am Chem Soc.	Binding Kinetics Survey of the Drugged Kinome	30362749	Kinase	NA	Gefitinib (Iressa)	Clc1c(F)ccc(Nc2ncnc3c2cc(OCCCN2CCOCC2)c(OC)c3)c1	6.27	-5.65	0.56	literature	Clc1c(F)ccc(Nc2ncnc3c2cc(OCCCN2CCOCC2)c(OC)c3)c1	3.14974	68.74	446.91	68.74	4
ABL	ABL_30362749	Fluorescent ligand-binding assay	J Am Chem Soc.	Binding Kinetics Survey of the Drugged Kinome	30362749	Kinase	NA	Golvatinib (E7050)	Fc1c(NC(=O)C2(C(=O)Nc3ccc(F)cc3)CC2)ccc(Oc2cc(NC(=O)N3CCC(N4CCN(C)CC4)CC3)ncc2)c1	7.17	-5.29	1.87	literature	Fc1c(NC(=O)C2(C(=O)Nc3ccc(F)cc3)CC2)ccc(Oc2cc(NC(=O)N3CCC(N4CCN(C)CC4)CC3)ncc2)c1	3.17	119.14	633.7	119.14	0
ABL	ABL_30362749	Fluorescent ligand-binding assay	J Am Chem Soc.	Binding Kinetics Survey of the Drugged Kinome	30362749	Kinase	NA	Hesperadin	S(=O)(=O)(Nc1cc2/C(=C(/Nc3ccc(CN4CCCCC4)cc3)\c3ccccc3)/C(=O)Nc2cc1)CC	7.8	-6.88	0.91	literature	S(=O)(=O)(Nc1cc2/C(=C(/Nc3ccc(CN4CCCCC4)cc3)\c3ccccc3)/C(=O)Nc2cc1)CC	5.433	90.54	516.666	90.54	0
ABL	ABL_30362749	Fluorescent ligand-binding assay	J Am Chem Soc.	Binding Kinetics Survey of the Drugged Kinome	30362749	Kinase	NA	INK 128 (MLN0128)	Nc1oc2c(n1)cc(-c1nn(C(C)C)c3ncnc(N)c13)cc2	6.35	-6	0.33	literature	Nc1oc2c(n1)cc(-c1nn(C(C)C)c3ncnc(N)c13)cc2	0.97853	121.67	309.333	121.67	0
ABL	ABL_30362749	Fluorescent ligand-binding assay	J Am Chem Soc.	Binding Kinetics Survey of the Drugged Kinome	30362749	Kinase	NA	Imatinib (Gleevec)	O=C(Nc1cc(Nc2nc(-c3cnccc3)ccn2)c(C)cc1)c1ccc(CN2CCN(C)CC2)cc1	7.57	-5.69	1.66	literature	O=C(Nc1cc(Nc2nc(-c3cnccc3)ccn2)c(C)cc1)c1ccc(CN2CCN(C)CC2)cc1	2.827	86.28	493.615	86.28	0
ABL	ABL_30362749	Fluorescent ligand-binding assay	J Am Chem Soc.	Binding Kinetics Survey of the Drugged Kinome	30362749	Kinase	NA	KRN 633	Clc1c(NC(=O)NCCC)ccc(Oc2ncnc3c2cc(OC)c(OC)c3)c1	5.78	-5.18	0.61	literature	Clc1c(NC(=O)NCCC)ccc(Oc2ncnc3c2cc(OC)c(OC)c3)c1	3.22974	94.6	416.865	94.6	1
ABL	ABL_30362749	Fluorescent ligand-binding assay	J Am Chem Soc.	Binding Kinetics Survey of the Drugged Kinome	30362749	Kinase	NA	KW 2449	O=C(N1CCNCC1)c1ccc(/C=C/c2n[nH]c3c2cccc3)cc1	7.53	-6.26	0.47	literature	O=C(N1CCNCC1)c1ccc(/C=C/c2n[nH]c3c2cccc3)cc1	3.087	61.02	332.407	61.02	0
ABL	ABL_30362749	Fluorescent ligand-binding assay	J Am Chem Soc.	Binding Kinetics Survey of the Drugged Kinome	30362749	Kinase	NA	Ki8751	Fc1c(NC(=O)Nc2c(F)cc(Oc3c4c(ncc3)cc(OC)c(OC)c4)cc2)ccc(F)c1	7.28	-5.7	1.59	literature	Fc1c(NC(=O)Nc2c(F)cc(Oc3c4c(ncc3)cc(OC)c(OC)c4)cc2)ccc(F)c1	4.56974	81.71	469.419	81.71	0
ABL	ABL_30362749	Fluorescent ligand-binding assay	J Am Chem Soc.	Binding Kinetics Survey of the Drugged Kinome	30362749	Kinase	NA	LDN193189	N1(c2ccc(C3=Cn4ncc(-c5c6c(ncc5)cccc6)c4N=C3)cc2)CCNCC1	7.11	-6.16	0.96	literature	N1(c2ccc(C3=Cn4ncc(-c5c6c(ncc5)cccc6)c4N=C3)cc2)CCNCC1	3.039	58.34	406.493	58.35	0
ABL	ABL_30362749	Fluorescent ligand-binding assay	J Am Chem Soc.	Binding Kinetics Survey of the Drugged Kinome	30362749	Kinase	NA	LY2784544	Clc1cc(F)c(Cc2c(C)nc3C(CN4CCOCC4)=CC(Nc4n[nH]c(C)c4)=Nn23)cc1	6.85	-5.89	0.95	literature	Clc1cc(F)c(Cc2c(C)nc3C(CN4CCOCC4)=CC(Nc4n[nH]c(C)c4)=Nn23)cc1	3.368	83.36	469.952	83.37	2
ABL	ABL_30362749	Fluorescent ligand-binding assay	J Am Chem Soc.	Binding Kinetics Survey of the Drugged Kinome	30362749	Kinase	NA	MGCD-265	S=C(NC(=O)Cc1ccc(F)cc1)Nc1cc(F)c(Oc2c3sc(-c4ncc(CNCCOC)cc4)cc3ncc2)cc1	7.94	-5.7	2.24	literature	S=C(NC(=O)Cc1ccc(F)cc1)Nc1cc(F)c(Oc2c3sc(-c4ncc(CNCCOC)cc4)cc3ncc2)cc1	5.155	129.49	619.717	97.4	2
ABL	ABL_30362749	Fluorescent ligand-binding assay	J Am Chem Soc.	Binding Kinetics Survey of the Drugged Kinome	30362749	Kinase	NA	MK-5108 (VX-689)	Clc1c(F)c(OC2CCC(C(=O)O)(Cc3nc(Nc4sccn4)ccc3)CC2)ccc1	8.81	-7.42	1.41	literature	Clc1c(F)c(OC2CCC(C(=O)O)(Cc3nc(Nc4sccn4)ccc3)CC2)ccc1	4.806	84.34	461.945	84.34	0
ABL	ABL_30362749	Fluorescent ligand-binding assay	J Am Chem Soc.	Binding Kinetics Survey of the Drugged Kinome	30362749	Kinase	NA	Masitinib (AB1010)	O=C(Nc1cc(Nc2scc(-c3cnccc3)n2)c(C)cc1)c1ccc(CN2CCN(C)CC2)cc1	7.41	-6.23	1.24	literature	O=C(Nc1cc(Nc2scc(-c3cnccc3)n2)c(C)cc1)c1ccc(CN2CCN(C)CC2)cc1	3.816	73.39	498.655	73.39	3
ABL	ABL_30362749	Fluorescent ligand-binding assay	J Am Chem Soc.	Binding Kinetics Survey of the Drugged Kinome	30362749	Kinase	NA	Milciclib (PHA-848125)	O=C(NC)c1nn(C)c-2c1C(C)(C)Cc1c-2nc(Nc2ccc(N3CCN(C)CC3)cc2)nc1	7.33	-6.88	0.5	literature	O=C(NC)c1nn(C)c-2c1C(C)(C)Cc1c-2nc(Nc2ccc(N3CCN(C)CC3)cc2)nc1	0.92053	91.21	460.586	91.21	1
ABL	ABL_30362749	Fluorescent ligand-binding assay	J Am Chem Soc.	Binding Kinetics Survey of the Drugged Kinome	30362749	Kinase	NA	Motesanib Diphosphate (AMG-706)	O=C(Nc1cc2NCC(C)(C)c2cc1)c1c(NCc2ccncc2)nccc1	5.84	-5.77	0.34	literature	O=C(Nc1cc2NCC(C)(C)c2cc1)c1c(NCc2ccncc2)nccc1	2.549	78.94	373.46	78.94	3
ABL	ABL_30362749	Fluorescent ligand-binding assay	J Am Chem Soc.	Binding Kinetics Survey of the Drugged Kinome	30362749	Kinase	NA	NVP-BHG712	FC(F)(F)c1cc(NC(=O)c2cc(Nc3nc(-c4cnccc4)nc4n(C)ncc34)c(C)cc2)ccc1	5.98	-4.03	1.97	literature	FC(F)(F)c1cc(NC(=O)c2cc(Nc3nc(-c4cnccc4)nc4n(C)ncc34)c(C)cc2)ccc1	4.15129	97.62	503.488	97.62	0
ABL	ABL_30362749	Fluorescent ligand-binding assay	J Am Chem Soc.	Binding Kinetics Survey of the Drugged Kinome	30362749	Kinase	NA	PCI-32765 (Ibrutinib)	O=C(C=C)N1C[C@H](n2nc(-c3ccc(Oc4ccccc4)cc3)c3c(N)ncnc23)CCC1	6.95	-4.91	2.05	literature	O=C(C=C)N1C[C@H](n2nc(-c3ccc(Oc4ccccc4)cc3)c3c(N)ncnc23)CCC1	3.24753	99.16	440.507	99.16	0
ABL	ABL_30362749	Fluorescent ligand-binding assay	J Am Chem Soc.	Binding Kinetics Survey of the Drugged Kinome	30362749	Kinase	NA	PD153035 HCl	Brc1cc(Nc2ncnc3c2cc(OC)c(OC)c3)ccc1	6.88	-6.43	0.5	literature	Brc1cc(Nc2ncnc3c2cc(OC)c(OC)c3)ccc1	3.31974	56.27	360.211	56.27	0
ABL	ABL_30362749	Fluorescent ligand-binding assay	J Am Chem Soc.	Binding Kinetics Survey of the Drugged Kinome	30362749	Kinase	NA	PF-03814735	FC(F)(F)c1c(NC2CCC2)nc(Nc2cc3[C@@H]4N(C(=O)CNC(=O)C)[C@H](c3cc2)CC4)nc1	7.24	-6.81	0.55	literature	FC(F)(F)c1c(NC2CCC2)nc(Nc2cc3[C@@H]4N(C(=O)CNC(=O)C)[C@H](c3cc2)CC4)nc1	2.73576	99.25	474.487	99.25	0
ABL	ABL_30362749	Fluorescent ligand-binding assay	J Am Chem Soc.	Binding Kinetics Survey of the Drugged Kinome	30362749	Kinase	NA	PHA-680632	O=C(Nc1c(CC)cccc1CC)N1Cc2c(NC(=O)c3ccc(N4CCN(C)CC4)cc3)n[nH]c2C1	7.68	-6.39	1.29	literature	O=C(Nc1c(CC)cccc1CC)N1Cc2c(NC(=O)c3ccc(N4CCN(C)CC4)cc3)n[nH]c2C1	3.374	96.6	501.635	96.6	0
ABL	ABL_30362749	Fluorescent ligand-binding assay	J Am Chem Soc.	Binding Kinetics Survey of the Drugged Kinome	30362749	Kinase	NA	PIK-75	BrC1=Cn2c(/C=N/N(S(=O)(=O)c3c(C)ccc([N+](=O)[O-])c3)C)cnc2C=C1	6.09	-5.7	0.35	literature	BrC1=Cn2c(/C=N/N(S(=O)(=O)c3c(C)ccc([N+](=O)[O-])c3)C)cnc2C=C1	3.093	113.38	452.289	110.18	0
ABL	ABL_30362749	Fluorescent ligand-binding assay	J Am Chem Soc.	Binding Kinetics Survey of the Drugged Kinome	30362749	Kinase	NA	PLX-4720	Clc1cnc2[nH]cc(C(=O)c3c(F)c(NS(=O)(=O)CCC)ccc3F)c2c1	6.44	-5.69	0.78	literature	Clc1cnc2[nH]cc(C(=O)c3c(F)c(NS(=O)(=O)CCC)ccc3F)c2c1	3.58	91.92	413.832	91.92	0
ABL	ABL_30362749	Fluorescent ligand-binding assay	J Am Chem Soc.	Binding Kinetics Survey of the Drugged Kinome	30362749	Kinase	NA	PP-121	Nc1ncnc2n(C3CCCC3)nc(-c3cnc4[nH]ccc4c3)c12	7.66	-6.31	1.39	literature	Nc1ncnc2n(C3CCCC3)nc(-c3cnc4[nH]ccc4c3)c12	1.75553	98.3	319.372	98.3	0
ABL	ABL_30362749	Fluorescent ligand-binding assay	J Am Chem Soc.	Binding Kinetics Survey of the Drugged Kinome	30362749	Kinase	NA	PP242	Oc1cc2c([nH]c(-c3nn(C(C)C)c4ncnc(N)c34)c2)cc1	6.72	-5.39	1.33	literature	Oc1cc2c([nH]c(-c3nn(C(C)C)c4ncnc(N)c34)c2)cc1	1.92806	105.64	308.345	105.64	0
ABL	ABL_30362749	Fluorescent ligand-binding assay	J Am Chem Soc.	Binding Kinetics Survey of the Drugged Kinome	30362749	Kinase	NA	Pelitinib (EKB-569)	Clc1c(F)ccc(Nc2c(C#N)cnc3c2cc(NC(=O)/C=C/CN(C)C)c(OCC)c3)c1	6.82	-5.65	1.17	literature	Clc1c(F)ccc(Nc2c(C#N)cnc3c2cc(NC(=O)/C=C/CN(C)C)c(OCC)c3)c1	3.98	90.28	467.932	90.28	0
ABL	ABL_30362749	Fluorescent ligand-binding assay	J Am Chem Soc.	Binding Kinetics Survey of the Drugged Kinome	30362749	Kinase	NA	SB590885	O(CCN(C)C)c1ccc(-c2[nH]c(c(-c3cc4c(/C(=N/O)/CC4)cc3)n2)-c2ccncc2)cc1	6.13	-5.34	0.79	literature	O(CCN(C)C)c1ccc(-c2[nH]c(c(-c3cc4c(/C(=N/O)/CC4)cc3)n2)-c2ccncc2)cc1	3.916	86.63	453.546	86.63	0
ABL	ABL_30362749	Fluorescent ligand-binding assay	J Am Chem Soc.	Binding Kinetics Survey of the Drugged Kinome	30362749	Kinase	NA	SP600125	O=C1c2c3c([nH]nc3-c3c1cccc3)ccc2	5.78	-4.2	1.64	literature	O=C1c2c3c([nH]nc3-c3c1cccc3)ccc2	3.233	45.75	220.231	45.75	0
ABL	ABL_30362749	Fluorescent ligand-binding assay	J Am Chem Soc.	Binding Kinetics Survey of the Drugged Kinome	30362749	Kinase	NA	Saracatinib (AZD0530)	Clc1c(Nc2ncnc3c2c(OC2CCOCC2)cc(OCCN2CCN(C)CC2)c3)c2OCOc2cc1	8.14	-6.7	1.43	literature	Clc1c(Nc2ncnc3c2c(OC2CCOCC2)cc(OCCN2CCN(C)CC2)c3)c2OCOc2cc1	2.962	90.44	542.036	90.44	3
ABL	ABL_30362749	Fluorescent ligand-binding assay	J Am Chem Soc.	Binding Kinetics Survey of the Drugged Kinome	30362749	Kinase	NA	Semaxanib (SU5416)	O=C1/C(=C\c2c(C)cc(C)[nH]2)/c2c(N1)cccc2	5.44	-5.11	0.35	literature	O=C1/C(=C\c2c(C)cc(C)[nH]2)/c2c(N1)cccc2	2.562	44.89	238.29	44.89	3
ABL	ABL_30362749	Fluorescent ligand-binding assay	J Am Chem Soc.	Binding Kinetics Survey of the Drugged Kinome	30362749	Kinase	NA	Staurosporine	O(C)[C@@H]1[C@H](NC)C[C@H]2O[C@]1(C)n1c3c4n2c2c(c4c4C(=O)NCc4c3c3c1cccc3)cccc2	7.41	-6.46	0.99	literature	O(C)[C@@H]1[C@H](NC)C[C@H]2O[C@]1(C)n1c3c4n2c2c(c4c4C(=O)NCc4c3c3c1cccc3)cccc2	6.35953	69.45	466.541	69.45	0
ABL	ABL_30362749	Fluorescent ligand-binding assay	J Am Chem Soc.	Binding Kinetics Survey of the Drugged Kinome	30362749	Kinase	NA	TAE684 (NVP-TAE684)	Clc1c(Nc2c(S(=O)(=O)C(C)C)cccc2)nc(Nc2c(OC)cc(N3CCC(N4CCN(C)CC4)CC3)cc2)nc1	6.96	-6.04	0.84	literature	Clc1c(Nc2c(S(=O)(=O)C(C)C)cccc2)nc(Nc2c(OC)cc(N3CCC(N4CCN(C)CC4)CC3)cc2)nc1	3.959	102.93	614.215	102.93	0
ABL	ABL_30362749	Fluorescent ligand-binding assay	J Am Chem Soc.	Binding Kinetics Survey of the Drugged Kinome	30362749	Kinase	NA	TAK-901	S(=O)(=O)(CC)c1cc(-c2c3c(c(C)c(C(=O)NC4CCN(C)CC4)c2)[nH]c2ncc(C)cc32)ccc1	8.18	-6.8	1.38	literature	S(=O)(=O)(CC)c1cc(-c2c3c(c(C)c(C(=O)NC4CCN(C)CC4)c2)[nH]c2ncc(C)cc32)ccc1	4.722	95.16	504.655	95.16	1
ABL	ABL_30362749	Fluorescent ligand-binding assay	J Am Chem Soc.	Binding Kinetics Survey of the Drugged Kinome	30362749	Kinase	NA	TG101348 (SAR302503)	S(=O)(=O)(NC(C)(C)C)c1cc(Nc2c(C)cnc(Nc3ccc(OCCN4CCCC4)cc3)n2)ccc1	6.86	-6.41	0.55	literature	S(=O)(=O)(NC(C)(C)C)c1cc(Nc2c(C)cnc(Nc3ccc(OCCN4CCCC4)cc3)n2)ccc1	4.068	108.48	524.69	108.48	3
ABL	ABL_30362749	Fluorescent ligand-binding assay	J Am Chem Soc.	Binding Kinetics Survey of the Drugged Kinome	30362749	Kinase	NA	TWS119	O(c1ncnc2[nH]c(-c3cc(N)ccc3)cc12)c1cc(O)ccc1	8.4	-7.06	1.37	literature	O(c1ncnc2[nH]c(-c3cc(N)ccc3)cc12)c1cc(O)ccc1	3.011	97.05	318.336	97.05	0
ABL	ABL_30362749	Fluorescent ligand-binding assay	J Am Chem Soc.	Binding Kinetics Survey of the Drugged Kinome	30362749	Kinase	NA	Tie2 kinase inhibitor	[SH0](=O)(C)c1ccc(-c2[nH]c(c(-c3cc4c(cc(OC)cc4)cc3)n2)-c2ccncc2)cc1	5.41	-5.03	0.37	literature	[SH0](=O)(C)c1ccc(-c2[nH]c(c(-c3cc4c(cc(OC)cc4)cc3)n2)-c2ccncc2)cc1	3.936	87.08	439.539	67.87
ABL	ABL_30362749	Fluorescent ligand-binding assay	J Am Chem Soc.	Binding Kinetics Survey of the Drugged Kinome	30362749	Kinase	NA	Tivozanib (AV-951)	Clc1c(NC(=O)Nc2noc(C)c2)ccc(Oc2c3c(ncc2)cc(OC)c(OC)c3)c1	8.45	-6.81	1.65	literature	Clc1c(NC(=O)Nc2noc(C)c2)ccc(Oc2c3c(ncc2)cc(OC)c(OC)c3)c1	3.61574	107.74	454.87	107.74	3
ABL	ABL_30362749	Fluorescent ligand-binding assay	J Am Chem Soc.	Binding Kinetics Survey of the Drugged Kinome	30362749	Kinase	NA	VX-680 (MK-0457 - Tozasertib)	S(c1nc(Nc2n[nH]c(C)c2)cc(N2CCN(C)CC2)n1)c1ccc(NC(=O)C2CC2)cc1	8.12	-7.18	1.05	literature	S(c1nc(Nc2n[nH]c(C)c2)cc(N2CCN(C)CC2)n1)c1ccc(NC(=O)C2CC2)cc1	2.586	102.07	464.598	102.07	2
ABL	ABL_30362749	Fluorescent ligand-binding assay	J Am Chem Soc.	Binding Kinetics Survey of the Drugged Kinome	30362749	Kinase	NA	Vandetanib (Zactima)	Brc1cc(F)c(Nc2ncnc3c2cc(OC)c(OCC2CCN(C)CC2)c3)cc1	7.73	-7.32	0.31	literature	Brc1cc(F)c(Nc2ncnc3c2cc(OC)c(OCC2CCN(C)CC2)c3)cc1	4.16674	59.51	475.362	59.51	4
ABL	ABL_30362749	Fluorescent ligand-binding assay	J Am Chem Soc.	Binding Kinetics Survey of the Drugged Kinome	30362749	Kinase	NA	WHI-P154	Brc1c(O)ccc(Nc2ncnc3c2cc(OC)c(OC)c3)c1	6.57	-5.45	1.17	literature	Brc1c(O)ccc(Nc2ncnc3c2cc(OC)c(OC)c3)c1	3.00974	76.5	376.21	76.5	0
ABL	ABL_30362749	Fluorescent ligand-binding assay	J Am Chem Soc.	Binding Kinetics Survey of the Drugged Kinome	30362749	Kinase	NA	WZ8040	Clc1c(Sc2cc(NC(=O)C=C)ccc2)nc(Nc2ccc(N3CCN(C)CC3)cc2)nc1	6.16	-5	1.08	literature	Clc1c(Sc2cc(NC(=O)C=C)ccc2)nc(Nc2ccc(N3CCN(C)CC3)cc2)nc1	3.823	73.39	481.024	73.39	0
ABL	ABL_30362749	Fluorescent ligand-binding assay	J Am Chem Soc.	Binding Kinetics Survey of the Drugged Kinome	30362749	Kinase	NA	XL-184 (Cabozantinib)	Fc1ccc(NC(=O)C2(C(=O)Nc3ccc(Oc4c5c(ncc4)cc(OC)c(OC)c5)cc3)CC2)cc1	7.44	-6.07	1.42	literature	Fc1ccc(NC(=O)C2(C(=O)Nc3ccc(Oc4c5c(ncc4)cc(OC)c(OC)c5)cc3)CC2)cc1	4.52074	98.78	501.514	98.78	4
ABL	ABL_30362749	Fluorescent ligand-binding assay	J Am Chem Soc.	Binding Kinetics Survey of the Drugged Kinome	30362749	Kinase	NA	ZM-447439	O=C(Nc1ccc(Nc2ncnc3c2cc(OC)c(OCCCN2CCOCC2)c3)cc1)c1ccccc1	6.38	-5.37	1.04	literature	O=C(Nc1ccc(Nc2ncnc3c2cc(OC)c(OCCCN2CCOCC2)c3)cc1)c1ccccc1	3.32274	97.84	513.598	97.84	0
AKT1	AKT1_30362749	Fluorescent ligand-binding assay	J Am Chem Soc.	Binding Kinetics Survey of the Drugged Kinome	30362749	Kinase	NA	A-674563	O(C[C@@H](N)Cc1ccccc1)c1cc(-c2cc3c(C)n[nH]c3cc2)cnc1	8.04	-5.77	2.26	literature	O(C[C@@H](N)Cc1ccccc1)c1cc(-c2cc3c(C)n[nH]c3cc2)cnc1	3.865	76.82	358.445	76.82	0
AKT1	AKT1_30362749	Fluorescent ligand-binding assay	J Am Chem Soc.	Binding Kinetics Survey of the Drugged Kinome	30362749	Kinase	NA	AT7867	Clc1ccc(C2(c3ccc(-c4c[nH]nc4)cc3)CCNCC2)cc1	7.94	-5.85	2.11	literature	Clc1ccc(C2(c3ccc(-c4c[nH]nc4)cc3)CCNCC2)cc1	5.426	40.71	337.854	40.71	0
AKT1	AKT1_30362749	Fluorescent ligand-binding assay	J Am Chem Soc.	Binding Kinetics Survey of the Drugged Kinome	30362749	Kinase	NA	AZD7762	Fc1cc(-c2sc(C(=O)N[C@@H]3CNCCC3)c(NC(=O)N)c2)ccc1	6.98	-4.98	2.01	literature	Fc1cc(-c2sc(C(=O)N[C@@H]3CNCCC3)c(NC(=O)N)c2)ccc1	1.64	96.25	362.429	96.25	0
AKT1	AKT1_30362749	Fluorescent ligand-binding assay	J Am Chem Soc.	Binding Kinetics Survey of the Drugged Kinome	30362749	Kinase	NA	BX-795	Ic1c(NCCCNC(=O)c2sccc2)nc(Nc2cc(NC(=O)N3CCCC3)ccc2)nc1	5.58	-3.55	2.02	literature	Ic1c(NCCCNC(=O)c2sccc2)nc(Nc2cc(NC(=O)N3CCCC3)ccc2)nc1	3.106	111.28	591.478	111.28	0
AKT1	AKT1_30362749	Fluorescent ligand-binding assay	J Am Chem Soc.	Binding Kinetics Survey of the Drugged Kinome	30362749	Kinase	NA	BX-912	Brc1c(NCCc2[nH]cnc2)nc(Nc2cc(NC(=O)N3CCCC3)ccc2)nc1	5.78	-3.74	2.04	literature	Brc1c(NCCc2[nH]cnc2)nc(Nc2cc(NC(=O)N3CCCC3)ccc2)nc1	1.234	110.86	471.363	110.86	0
AKT1	AKT1_30362749	Fluorescent ligand-binding assay	J Am Chem Soc.	Binding Kinetics Survey of the Drugged Kinome	30362749	Kinase	NA	Baricitinib (LY3009104 - incb28050)	S(=O)(=O)(CC)N1CC(CC#N)(n2ncc(-c3ncnc4[nH]ccc34)c2)C1	5.67	-3.69	1.97	literature	S(=O)(=O)(CC)N1CC(CC#N)(n2ncc(-c3ncnc4[nH]ccc34)c2)C1	-1.528	120.56	371.425	120.56	4
AKT1	AKT1_30362749	Fluorescent ligand-binding assay	J Am Chem Soc.	Binding Kinetics Survey of the Drugged Kinome	30362749	Kinase	NA	Bosutinib (SKI-606)	Clc1c(OC)cc(Nc2c(C#N)cnc3c2cc(OC)c(OCCCN2CCN(C)CC2)c3)c(Cl)c1	5.33	-2.98	2.34	literature	Clc1c(OC)cc(Nc2c(C#N)cnc3c2cc(OC)c(OCCCN2CCN(C)CC2)c3)c(Cl)c1	3.93474	82.88	530.456	82.88	4
AKT1	AKT1_30362749	Fluorescent ligand-binding assay	J Am Chem Soc.	Binding Kinetics Survey of the Drugged Kinome	30362749	Kinase	NA	CCT128930	O=C(Nc1sc(c(C)n1)-c1nc(C(C)(C)C)sc1)N1[C@H](C(=O)N)CCC1	8.32	-5.98	2.36	literature	O=C(Nc1sc(c(C)n1)-c1nc(C(C)(C)C)sc1)N1[C@H](C(=O)N)CCC1	1.646	101.21	393.536	101.21	0
AKT1	AKT1_30362749	Fluorescent ligand-binding assay	J Am Chem Soc.	Binding Kinetics Survey of the Drugged Kinome	30362749	Kinase	NA	CEP33779	S(=O)(=O)(C)c1ccc(C=2c3n(nc(Nc4cc(N5CCN(C)CC5)ccc4)n3)C=CC=2)cc1	5.62	-3.47	2.15	literature	S(=O)(=O)(C)c1ccc(C=2c3n(nc(Nc4cc(N5CCN(C)CC5)ccc4)n3)C=CC=2)cc1	1.624	83.36	462.578	82.84	0
AKT1	AKT1_30362749	Fluorescent ligand-binding assay	J Am Chem Soc.	Binding Kinetics Survey of the Drugged Kinome	30362749	Kinase	NA	CHIR-124	Clc1cc2C(N[C@H]3C4CCN(C3)CC4)=C(c3[nH]c4c(n3)cccc4)C(=O)Nc2cc1	5.97	-3.71	2.27	literature	Clc1cc2C(N[C@H]3C4CCN(C3)CC4)=C(c3[nH]c4c(n3)cccc4)C(=O)Nc2cc1	3.375	73.05	419.916	76.81	0
AKT1	AKT1_30362749	Fluorescent ligand-binding assay	J Am Chem Soc.	Binding Kinetics Survey of the Drugged Kinome	30362749	Kinase	NA	CYC116	N(c1nc(-c2c(C)nc(N)s2)ccn1)c1ccc(N2CCOCC2)cc1	5.26	-2.73	2.46	literature	N(c1nc(-c2c(C)nc(N)s2)ccn1)c1ccc(N2CCOCC2)cc1	1.126	89.19	368.465	89.19	1
AKT1	AKT1_30362749	Fluorescent ligand-binding assay	J Am Chem Soc.	Binding Kinetics Survey of the Drugged Kinome	30362749	Kinase	NA	PF-03814735	FC(F)(F)c1c(NC2CCC2)nc(Nc2cc3[C@@H]4N(C(=O)CNC(=O)C)[C@H](c3cc2)CC4)nc1	5.38	-3.01	2.08	literature	FC(F)(F)c1c(NC2CCC2)nc(Nc2cc3[C@@H]4N(C(=O)CNC(=O)C)[C@H](c3cc2)CC4)nc1	2.73576	99.25	474.487	99.25	0
AKT1	AKT1_30362749	Fluorescent ligand-binding assay	J Am Chem Soc.	Binding Kinetics Survey of the Drugged Kinome	30362749	Kinase	NA	PHA-767491	O=C1NCCc2[nH]c(-c3ccncc3)cc12	5.73	-3.67	2.05	literature	O=C1NCCc2[nH]c(-c3ccncc3)cc12	0.568	57.78	213.24	57.78	0
AKT1	AKT1_30362749	Fluorescent ligand-binding assay	J Am Chem Soc.	Binding Kinetics Survey of the Drugged Kinome	30362749	Kinase	NA	PIK-75	BrC1=Cn2c(/C=N/N(S(=O)(=O)c3c(C)ccc([N+](=O)[O-])c3)C)cnc2C=C1	7.26	-5.28	1.99	literature	BrC1=Cn2c(/C=N/N(S(=O)(=O)c3c(C)ccc([N+](=O)[O-])c3)C)cnc2C=C1	3.093	113.38	452.289	110.18	0
AKT1	AKT1_30362749	Fluorescent ligand-binding assay	J Am Chem Soc.	Binding Kinetics Survey of the Drugged Kinome	30362749	Kinase	NA	PP-121	Nc1ncnc2n(C3CCCC3)nc(-c3cnc4[nH]ccc4c3)c12	5.58	-3.33	2.25	literature	Nc1ncnc2n(C3CCCC3)nc(-c3cnc4[nH]ccc4c3)c12	1.75553	98.3	319.372	98.3	0
AKT1	AKT1_30362749	Fluorescent ligand-binding assay	J Am Chem Soc.	Binding Kinetics Survey of the Drugged Kinome	30362749	Kinase	NA	PP242	Oc1cc2c([nH]c(-c3nn(C(C)C)c4ncnc(N)c34)c2)cc1	5.61	-3.05	2.5	literature	Oc1cc2c([nH]c(-c3nn(C(C)C)c4ncnc(N)c34)c2)cc1	1.92806	105.64	308.345	105.64	0
AKT1	AKT1_30362749	Fluorescent ligand-binding assay	J Am Chem Soc.	Binding Kinetics Survey of the Drugged Kinome	30362749	Kinase	NA	Sotrastaurin (AEB071)	O=C1C(c2nc(N3CCN(C)CC3)nc3c2cccc3)=C(c2c3c([nH]c2)cccc3)C(=O)N1	5.43	-3.03	2.25	literature	O=C1C(c2nc(N3CCN(C)CC3)nc3c2cccc3)=C(c2c3c([nH]c2)cccc3)C(=O)N1	2.127	94.22	438.491	94.22	2
AKT1	AKT1_30362749	Fluorescent ligand-binding assay	J Am Chem Soc.	Binding Kinetics Survey of the Drugged Kinome	30362749	Kinase	NA	Staurosporine	O(C)[C@@H]1[C@H](NC)C[C@H]2O[C@]1(C)n1c3c4n2c2c(c4c4C(=O)NCc4c3c3c1cccc3)cccc2	9.27	-6.66	2.62	literature	O(C)[C@@H]1[C@H](NC)C[C@H]2O[C@]1(C)n1c3c4n2c2c(c4c4C(=O)NCc4c3c3c1cccc3)cccc2	6.35953	69.45	466.541	69.45	0
AKT1	AKT1_30362749	Fluorescent ligand-binding assay	J Am Chem Soc.	Binding Kinetics Survey of the Drugged Kinome	30362749	Kinase	NA	Sunitinib Malate (Sutent)	Fc1cc2/C(=C/c3c(C)c(C(=O)NCCN(CC)CC)c(C)[nH]3)/C(=O)Nc2cc1.O=C(O)[C@@H](O)CC(=O)O	5.64	-3.66	1.98	literature	Fc1cc2/C(=C/c3c(C)c(C(=O)NCCN(CC)CC)c(C)[nH]3)/C(=O)Nc2cc1	2.569	77.23	398.482	77.23	0
AKT1	AKT1_30362749	Fluorescent ligand-binding assay	J Am Chem Soc.	Binding Kinetics Survey of the Drugged Kinome	30362749	Kinase	NA	TAK-901	S(=O)(=O)(CC)c1cc(-c2c3c(c(C)c(C(=O)NC4CCN(C)CC4)c2)[nH]c2ncc(C)cc32)ccc1	5.42	-3.32	2.1	literature	S(=O)(=O)(CC)c1cc(-c2c3c(c(C)c(C(=O)NC4CCN(C)CC4)c2)[nH]c2ncc(C)cc32)ccc1	4.722	95.16	504.655	95.16	1
AKT1	AKT1_30362749	Fluorescent ligand-binding assay	J Am Chem Soc.	Binding Kinetics Survey of the Drugged Kinome	30362749	Kinase	NA	TG101348 (SAR302503)	S(=O)(=O)(NC(C)(C)C)c1cc(Nc2c(C)cnc(Nc3ccc(OCCN4CCCC4)cc3)n2)ccc1	5.84	-3.53	2.31	literature	S(=O)(=O)(NC(C)(C)C)c1cc(Nc2c(C)cnc(Nc3ccc(OCCN4CCCC4)cc3)n2)ccc1	4.068	108.48	524.69	108.48	3
AKT1	AKT1_30362749	Fluorescent ligand-binding assay	J Am Chem Soc.	Binding Kinetics Survey of the Drugged Kinome	30362749	Kinase	NA	Thiazovivin	O=C(NCc1ccccc1)c1nc(Nc2ncncc2)sc1	6.43	-4.28	2.15	literature	O=C(NCc1ccccc1)c1nc(Nc2ncncc2)sc1	1.345	79.8	311.369	79.8	0
ALK	ALK_30362749	Fluorescent ligand-binding assay	J Am Chem Soc.	Binding Kinetics Survey of the Drugged Kinome	30362749	Kinase	NA	AEE788 (NVP-AEE788)	N([C@H](C)c1ccccc1)c1ncnc2[nH]c(-c3ccc(CN4CCN(CC)CC4)cc3)cc12	6.43	-5.51	0.9	literature	N([C@H](C)c1ccccc1)c1ncnc2[nH]c(-c3ccc(CN4CCN(CC)CC4)cc3)cc12	4.119	60.08	440.595	60.08	0
ALK	ALK_30362749	Fluorescent ligand-binding assay	J Am Chem Soc.	Binding Kinetics Survey of the Drugged Kinome	30362749	Kinase	NA	AG-1478 (Tyrphostin AG-1478)	Clc1cc(Nc2ncnc3c2cc(OC)c(OC)c3)ccc1	5.25	-4.17	1.09	literature	Clc1cc(Nc2ncnc3c2cc(OC)c(OC)c3)ccc1	3.11374	56.27	315.76	56.27	0
ALK	ALK_30362749	Fluorescent ligand-binding assay	J Am Chem Soc.	Binding Kinetics Survey of the Drugged Kinome	30362749	Kinase	NA	AT9283	O=C(Nc1c(-c2[nH]c3c(n2)cc(CN2CCOCC2)cc3)n[nH]c1)NC1CC1	6.03	-5.04	0.99	literature	O=C(Nc1c(-c2[nH]c3c(n2)cc(CN2CCOCC2)cc3)n[nH]c1)NC1CC1	1.13706	110.96	381.44	110.96
ALK	ALK_30362749	Fluorescent ligand-binding assay	J Am Chem Soc.	Binding Kinetics Survey of the Drugged Kinome	30362749	Kinase	NA	AZ 960	Fc1c(Nc2n[nH]c(C)c2)nc(N[C@@H](C)c2ccc(F)cc2)c(C#N)c1	7.56	-6.51	1.06	literature	Fc1c(Nc2n[nH]c(C)c2)nc(N[C@@H](C)c2ccc(F)cc2)c(C#N)c1	3.894	89.42	354.364	89.42	0
ALK	ALK_30362749	Fluorescent ligand-binding assay	J Am Chem Soc.	Binding Kinetics Survey of the Drugged Kinome	30362749	Kinase	NA	AZD4547	O=C(Nc1n[nH]c(CCc2cc(OC)cc(OC)c2)c1)c1ccc(N2C[C@@H](C)N[C@@H](C)C2)cc1	6.59	-5.84	0.73	literature	O=C(Nc1n[nH]c(CCc2cc(OC)cc(OC)c2)c1)c1ccc(N2C[C@@H](C)N[C@@H](C)C2)cc1	3.948	91.51	463.582	91.51	2
ALK	ALK_30362749	Fluorescent ligand-binding assay	J Am Chem Soc.	Binding Kinetics Survey of the Drugged Kinome	30362749	Kinase	NA	AZD7762	Fc1cc(-c2sc(C(=O)N[C@@H]3CNCCC3)c(NC(=O)N)c2)ccc1	6.63	-5.84	0.83	literature	Fc1cc(-c2sc(C(=O)N[C@@H]3CNCCC3)c(NC(=O)N)c2)ccc1	1.64	96.25	362.429	96.25	0
ALK	ALK_30362749	Fluorescent ligand-binding assay	J Am Chem Soc.	Binding Kinetics Survey of the Drugged Kinome	30362749	Kinase	NA	AZD8931	Clc1c(F)c(Nc2ncnc3c2cc(OC2CCN(CC(=O)NC)CC2)c(OC)c3)ccc1	5.95	-5.22	0.73	literature	Clc1c(F)c(Nc2ncnc3c2cc(OC2CCN(CC(=O)NC)CC2)c(OC)c3)ccc1	2.88274	88.61	473.936	88.61	2
ALK	ALK_30362749	Fluorescent ligand-binding assay	J Am Chem Soc.	Binding Kinetics Survey of the Drugged Kinome	30362749	Kinase	NA	Afatinib (BIBW2992)	Clc1c(F)ccc(Nc2ncnc3c2cc(NC(=O)/C=C/CN(C)C)c(O[C@@H]2COCC2)c3)c1	5.47	-4.44	1.05	literature	Clc1c(F)ccc(Nc2ncnc3c2cc(NC(=O)/C=C/CN(C)C)c(O[C@@H]2COCC2)c3)c1	3.372	88.61	485.947	88.61	0
ALK	ALK_30362749	Fluorescent ligand-binding assay	J Am Chem Soc.	Binding Kinetics Survey of the Drugged Kinome	30362749	Kinase	NA	BEZ235 (NVP-BEZ235)	O=C1N(C)c2c(N1c1ccc(C(C#N)(C)C)cc1)c1c(nc2)ccc(-c2cnc3c(c2)cccc3)c1	5.5	-4.22	1.32	literature	O=C1N(C)c2c(N1c1ccc(C(C#N)(C)C)cc1)c1c(nc2)ccc(-c2cnc3c(c2)cccc3)c1	6.131	73.12	469.548	76.5	0
ALK	ALK_30362749	Fluorescent ligand-binding assay	J Am Chem Soc.	Binding Kinetics Survey of the Drugged Kinome	30362749	Kinase	NA	BI 2536	O=C(NC1CCN(C)CC1)c1cc(OC)c(Nc2nc3N([C@H](CC)C(=O)N(C)c3cn2)C2CCCC2)cc1	6.42	-5.52	0.9	literature	O=C(NC1CCN(C)CC1)c1cc(OC)c(Nc2nc3N([C@H](CC)C(=O)N(C)c3cn2)C2CCCC2)cc1	3.039	102.93	521.666	102.93	0
ALK	ALK_30362749	Fluorescent ligand-binding assay	J Am Chem Soc.	Binding Kinetics Survey of the Drugged Kinome	30362749	Kinase	NA	BI6727 (Volasertib)	O=C(NC1CCC(N2CCN(CC3CC3)CC2)CC1)c1cc(OC)c(Nc2nc3N(C(C)C)[C@H](CC)C(=O)N(C)c3cn2)cc1	6.11	-5.1	1.01	literature	O=C(NC1CCC(N2CCN(CC3CC3)CC2)CC1)c1cc(OC)c(Nc2nc3N(C(C)C)[C@H](CC)C(=O)N(C)c3cn2)cc1	3.654	106.17	618.827	106.17	0
ALK	ALK_30362749	Fluorescent ligand-binding assay	J Am Chem Soc.	Binding Kinetics Survey of the Drugged Kinome	30362749	Kinase	NA	BIBF1120 (Vargatef)	O=C(N(C)c1ccc(N/C(/c2ccccc2)=C/2\C(=O)Nc3c\2ccc(C(=O)OC)c3)cc1)CN1CCN(C)CC1	7.99	-6.59	1.04	literature	O=C(N(C)c1ccc(N/C(/c2ccccc2)=C/2\C(=O)Nc3c\2ccc(C(=O)OC)c3)cc1)CN1CCN(C)CC1	3.507	94.22	539.636	94.22	0
ALK	ALK_30362749	Fluorescent ligand-binding assay	J Am Chem Soc.	Binding Kinetics Survey of the Drugged Kinome	30362749	Kinase	NA	BMS 777607	Clc1c(N)nccc1Oc1c(F)cc(NC(=O)C=2C(=O)N(c3ccc(F)cc3)C=CC=2OCC)cc1	5.09	-3.62	1.53	literature	Clc1c(N)nccc1Oc1c(F)cc(NC(=O)C=2C(=O)N(c3ccc(F)cc3)C=CC=2OCC)cc1	3.964	106.78	512.9	108.47	2
ALK	ALK_30362749	Fluorescent ligand-binding assay	J Am Chem Soc.	Binding Kinetics Survey of the Drugged Kinome	30362749	Kinase	NA	BMS-265246	Fc1c(C(=O)c2c(OCCCC)c3c([nH]nc3)nc2)c(F)cc(C)c1	5.52	-3.78	1.74	literature	Fc1c(C(=O)c2c(OCCCC)c3c([nH]nc3)nc2)c(F)cc(C)c1	4.48253	67.87	345.349	67.87
ALK	ALK_30362749	Fluorescent ligand-binding assay	J Am Chem Soc.	Binding Kinetics Survey of the Drugged Kinome	30362749	Kinase	NA	BS-181 HCl	N(CCCCCCN)C1=Nc2c(C(C)C)cnn2C(NCc2ccccc2)=C1	5.12	-4.38	0.72	literature	N(CCCCCCN)C1=Nc2c(C(C)C)cnn2C(NCc2ccccc2)=C1	3.834	80.26	380.54	80.27	0
ALK	ALK_30362749	Fluorescent ligand-binding assay	J Am Chem Soc.	Binding Kinetics Survey of the Drugged Kinome	30362749	Kinase	NA	BX-912	Brc1c(NCCc2[nH]cnc2)nc(Nc2cc(NC(=O)N3CCCC3)ccc2)nc1	5.74	-4.76	0.98	literature	Brc1c(NCCc2[nH]cnc2)nc(Nc2cc(NC(=O)N3CCCC3)ccc2)nc1	1.234	110.86	471.363	110.86	0
ALK	ALK_30362749	Fluorescent ligand-binding assay	J Am Chem Soc.	Binding Kinetics Survey of the Drugged Kinome	30362749	Kinase	NA	Baricitinib (LY3009104 - incb28050)	S(=O)(=O)(CC)N1CC(CC#N)(n2ncc(-c3ncnc4[nH]ccc34)c2)C1	5.28	-4.5	0.79	literature	S(=O)(=O)(CC)N1CC(CC#N)(n2ncc(-c3ncnc4[nH]ccc34)c2)C1	-1.528	120.56	371.425	120.56	4
ALK	ALK_30362749	Fluorescent ligand-binding assay	J Am Chem Soc.	Binding Kinetics Survey of the Drugged Kinome	30362749	Kinase	NA	Bosutinib (SKI-606)	Clc1c(OC)cc(Nc2c(C#N)cnc3c2cc(OC)c(OCCCN2CCN(C)CC2)c3)c(Cl)c1	5.69	-4.85	0.89	literature	Clc1c(OC)cc(Nc2c(C#N)cnc3c2cc(OC)c(OCCCN2CCN(C)CC2)c3)c(Cl)c1	3.93474	82.88	530.456	82.88	4
ALK	ALK_30362749	Fluorescent ligand-binding assay	J Am Chem Soc.	Binding Kinetics Survey of the Drugged Kinome	30362749	Kinase	NA	CEP33779	S(=O)(=O)(C)c1ccc(C=2c3n(nc(Nc4cc(N5CCN(C)CC5)ccc4)n3)C=CC=2)cc1	5.47	-4.57	0.97	literature	S(=O)(=O)(C)c1ccc(C=2c3n(nc(Nc4cc(N5CCN(C)CC5)ccc4)n3)C=CC=2)cc1	1.624	83.36	462.578	82.84	0
ALK	ALK_30362749	Fluorescent ligand-binding assay	J Am Chem Soc.	Binding Kinetics Survey of the Drugged Kinome	30362749	Kinase	NA	CH5424802	O=C1c2c3c([nH]c2C(C)(C)c2c1cc(CC)c(N1CCC(N4CCOCC4)CC1)c2)cc(C#N)cc3	7.73	-7.47	1.04	literature	O=C1c2c3c([nH]c2C(C)(C)c2c1cc(CC)c(N1CCC(N4CCOCC4)CC1)c2)cc(C#N)cc3	5.589	72.36	482.628	72.36	4
ALK	ALK_30362749	Fluorescent ligand-binding assay	J Am Chem Soc.	Binding Kinetics Survey of the Drugged Kinome	30362749	Kinase	NA	CI-1033 (Canertinib)	Clc1c(F)ccc(Nc2ncnc3c2cc(NC(=O)C=C)c(OCCCN2CCOCC2)c3)c1	5.38	-4.4	0.98	literature	Clc1c(F)ccc(Nc2ncnc3c2cc(NC(=O)C=C)c(OCCCN2CCOCC2)c3)c1	3.269	88.61	485.947	88.61	3
ALK	ALK_30362749	Fluorescent ligand-binding assay	J Am Chem Soc.	Binding Kinetics Survey of the Drugged Kinome	30362749	Kinase	NA	CYC116	N(c1nc(-c2c(C)nc(N)s2)ccn1)c1ccc(N2CCOCC2)cc1	5.6	-4.69	0.92	literature	N(c1nc(-c2c(C)nc(N)s2)ccn1)c1ccc(N2CCOCC2)cc1	1.126	89.19	368.465	89.19	1
ALK	ALK_30362749	Fluorescent ligand-binding assay	J Am Chem Soc.	Binding Kinetics Survey of the Drugged Kinome	30362749	Kinase	NA	Cediranib (AZD2171)	Fc1c(Oc2ncnc3c2cc(OC)c(OCCCN2CCCC2)c3)ccc2[nH]c(C)cc12	5.73	-4.71	1.03	literature	Fc1c(Oc2ncnc3c2cc(OC)c(OCCCN2CCCC2)c3)ccc2[nH]c(C)cc12	4.21274	72.5	450.514	72.5	3
ALK	ALK_30362749	Fluorescent ligand-binding assay	J Am Chem Soc.	Binding Kinetics Survey of the Drugged Kinome	30362749	Kinase	NA	Dabrafenib (GSK2118436)	S(=O)(=O)(Nc1c(F)c(-c2c(-c3nc(N)ncc3)sc(C(C)(C)C)n2)ccc1)c1c(F)cccc1F	5.16	-3.82	1.34	literature	S(=O)(=O)(Nc1c(F)c(-c2c(-c3nc(N)ncc3)sc(C(C)(C)C)n2)ccc1)c1c(F)cccc1F	4.291	110.86	519.572	110.86	4
ALK	ALK_30362749	Fluorescent ligand-binding assay	J Am Chem Soc.	Binding Kinetics Survey of the Drugged Kinome	30362749	Kinase	NA	Dacomitinib (PF299804 - PF-00299804)	Clc1c(F)ccc(Nc2ncnc3c2cc(NC(=O)/C=C/CN2CCCCC2)c(OC)c3)c1	5.64	-4.31	1.35	literature	Clc1c(F)ccc(Nc2ncnc3c2cc(NC(=O)/C=C/CN2CCCCC2)c(OC)c3)c1	4.217	79.38	469.948	79.38	4
ALK	ALK_30362749	Fluorescent ligand-binding assay	J Am Chem Soc.	Binding Kinetics Survey of the Drugged Kinome	30362749	Kinase	NA	Danusertib (PHA-739358)	O=C([C@H](OC)c1ccccc1)N1Cc2c(NC(=O)c3ccc(N4CCN(C)CC4)cc3)n[nH]c2C1	6.46	-5.64	0.84	literature	O=C([C@H](OC)c1ccccc1)N1Cc2c(NC(=O)c3ccc(N4CCN(C)CC4)cc3)n[nH]c2C1	2.235	93.8	474.565	93.8	0
ALK	ALK_30362749	Fluorescent ligand-binding assay	J Am Chem Soc.	Binding Kinetics Survey of the Drugged Kinome	30362749	Kinase	NA	Desmethyl Erlotinib (CP-473420)	O(CCOc1c(OCCO)cc2c(Nc3cc(C#C)ccc3)ncnc2c1)C	5.5	-4.45	1.06	literature	O(CCOc1c(OCCO)cc2c(Nc3cc(C#C)ccc3)ncnc2c1)C	1.97548	85.73	379.416	85.73	0
ALK	ALK_30362749	Fluorescent ligand-binding assay	J Am Chem Soc.	Binding Kinetics Survey of the Drugged Kinome	30362749	Kinase	NA	Dovitinib (TKI-258)	Fc1c2C(N)=C(c3[nH]c4c(n3)ccc(N3CCN(C)CC3)c4)C(=O)Nc2ccc1	6.54	-5.64	0.85	literature	Fc1c2C(N)=C(c3[nH]c4c(n3)ccc(N3CCN(C)CC3)c4)C(=O)Nc2ccc1	1.59	90.28	392.438	94.04	3
ALK	ALK_30362749	Fluorescent ligand-binding assay	J Am Chem Soc.	Binding Kinetics Survey of the Drugged Kinome	30362749	Kinase	NA	ENMD-2076	N(c1nc(/C=C/c2ccccc2)nc(N2CCN(C)CC2)c1)c1n[nH]c(C)c1	5.08	-3.79	1.24	literature	N(c1nc(/C=C/c2ccccc2)nc(N2CCN(C)CC2)c1)c1n[nH]c(C)c1	2.969	72.97	375.48	72.97	0
ALK	ALK_30362749	Fluorescent ligand-binding assay	J Am Chem Soc.	Binding Kinetics Survey of the Drugged Kinome	30362749	Kinase	NA	Flavopiridol HCl	Clc1c(C=2Oc3c([C@@H]4[C@H](O)CN(C)CC4)c(O)cc(O)c3C(=O)C=2)cccc1	5.88	-5.25	0.67	literature	Clc1c(C=2Oc3c([C@@H]4[C@H](O)CN(C)CC4)c(O)cc(O)c3C(=O)C=2)cccc1	2.902	90.23	401.846	94.14	0
ALK	ALK_30362749	Fluorescent ligand-binding assay	J Am Chem Soc.	Binding Kinetics Survey of the Drugged Kinome	30362749	Kinase	NA	Foretinib (GSK1363089 - XL880)	Fc1c(Oc2c3c(ncc2)cc(OCCCN2CCOCC2)c(OC)c3)ccc(NC(=O)C2(C(=O)Nc3ccc(F)cc3)CC2)c1	6.97	-6.04	0.94	literature	Fc1c(Oc2c3c(ncc2)cc(OCCCN2CCOCC2)c(OC)c3)ccc(NC(=O)C2(C(=O)Nc3ccc(F)cc3)CC2)c1	4.59374	111.25	632.664	111.25	2
ALK	ALK_30362749	Fluorescent ligand-binding assay	J Am Chem Soc.	Binding Kinetics Survey of the Drugged Kinome	30362749	Kinase	NA	GDC-0879	O/N=C\1/c2c(cc(-c3c(-c4ccncc4)nn(CCO)c3)cc2)CC/1	5.08	-3.4	1.67	literature	O/N=C\1/c2c(cc(-c3c(-c4ccncc4)nn(CCO)c3)cc2)CC/1	1.839	83.53	334.379	83.53	0
ALK	ALK_30362749	Fluorescent ligand-binding assay	J Am Chem Soc.	Binding Kinetics Survey of the Drugged Kinome	30362749	Kinase	NA	GDC-0980 (RG7422)	O=C([C@@H](O)C)N1CCN(Cc2c(C)c3nc(-c4cnc(N)nc4)nc(N4CCOCC4)c3s2)CC1	5.9	-4.9	1.01	literature	O=C([C@@H](O)C)N1CCN(Cc2c(C)c3nc(-c4cnc(N)nc4)nc(N4CCOCC4)c3s2)CC1	-1.016	133.83	498.612	133.83	2
ALK	ALK_30362749	Fluorescent ligand-binding assay	J Am Chem Soc.	Binding Kinetics Survey of the Drugged Kinome	30362749	Kinase	NA	GSK1070916	O=C(N(C)C)Nc1ccc(-c2c(-c3c4c([nH]c(-c5cc(CN(C)C)ccc5)c4)ncc3)cn(CC)n2)cc1	5.87	-4.54	1.33	literature	O=C(N(C)C)Nc1ccc(-c2c(-c3c4c([nH]c(-c5cc(CN(C)C)ccc5)c4)ncc3)cn(CC)n2)cc1	4.46	82.08	507.642	82.08	1
ALK	ALK_30362749	Fluorescent ligand-binding assay	J Am Chem Soc.	Binding Kinetics Survey of the Drugged Kinome	30362749	Kinase	NA	GSK1838705A	Fc1c(C(=O)NC)c(Nc2nc(Nc3c(OC)cc4c(N(C(=O)CN(C)C)CC4)c3)nc3[nH]ccc23)ccc1	8.81	-7.05	1.76	literature	Fc1c(C(=O)NC)c(Nc2nc(Nc3c(OC)cc4c(N(C(=O)CN(C)C)CC4)c3)nc3[nH]ccc23)ccc1	2.101	127.51	532.58	127.51	0
ALK	ALK_30362749	Fluorescent ligand-binding assay	J Am Chem Soc.	Binding Kinetics Survey of the Drugged Kinome	30362749	Kinase	NA	Gefitinib (Iressa)	Clc1c(F)ccc(Nc2ncnc3c2cc(OCCCN2CCOCC2)c(OC)c3)c1	5.22	-4.5	0.73	literature	Clc1c(F)ccc(Nc2ncnc3c2cc(OCCCN2CCOCC2)c(OC)c3)c1	3.14974	68.74	446.91	68.74	4
ALK	ALK_30362749	Fluorescent ligand-binding assay	J Am Chem Soc.	Binding Kinetics Survey of the Drugged Kinome	30362749	Kinase	NA	Golvatinib (E7050)	Fc1c(NC(=O)C2(C(=O)Nc3ccc(F)cc3)CC2)ccc(Oc2cc(NC(=O)N3CCC(N4CCN(C)CC4)CC3)ncc2)c1	7.14	-5.77	1.37	literature	Fc1c(NC(=O)C2(C(=O)Nc3ccc(F)cc3)CC2)ccc(Oc2cc(NC(=O)N3CCC(N4CCN(C)CC4)CC3)ncc2)c1	3.17	119.14	633.7	119.14	0
ALK	ALK_30362749	Fluorescent ligand-binding assay	J Am Chem Soc.	Binding Kinetics Survey of the Drugged Kinome	30362749	Kinase	NA	Hesperadin	S(=O)(=O)(Nc1cc2/C(=C(/Nc3ccc(CN4CCCCC4)cc3)\c3ccccc3)/C(=O)Nc2cc1)CC	8.72	-7.52	1.2	literature	S(=O)(=O)(Nc1cc2/C(=C(/Nc3ccc(CN4CCCCC4)cc3)\c3ccccc3)/C(=O)Nc2cc1)CC	5.433	90.54	516.666	90.54	0
ALK	ALK_30362749	Fluorescent ligand-binding assay	J Am Chem Soc.	Binding Kinetics Survey of the Drugged Kinome	30362749	Kinase	NA	INK 128 (MLN0128)	Nc1oc2c(n1)cc(-c1nn(C(C)C)c3ncnc(N)c13)cc2	5.28	-4.23	1.06	literature	Nc1oc2c(n1)cc(-c1nn(C(C)C)c3ncnc(N)c13)cc2	0.97853	121.67	309.333	121.67	0
ALK	ALK_30362749	Fluorescent ligand-binding assay	J Am Chem Soc.	Binding Kinetics Survey of the Drugged Kinome	30362749	Kinase	NA	JNJ-7706621	S(=O)(=O)(N)c1ccc(Nc2nn(C(=O)c3c(F)cccc3F)c(N)n2)cc1	5.95	-5.05	0.91	literature	S(=O)(=O)(N)c1ccc(Nc2nn(C(=O)c3c(F)cccc3F)c(N)n2)cc1	0.89	145.99	394.362	145.99	0
ALK	ALK_30362749	Fluorescent ligand-binding assay	J Am Chem Soc.	Binding Kinetics Survey of the Drugged Kinome	30362749	Kinase	NA	Ki8751	Fc1c(NC(=O)Nc2c(F)cc(Oc3c4c(ncc3)cc(OC)c(OC)c4)cc2)ccc(F)c1	5.27	-3.96	1.32	literature	Fc1c(NC(=O)Nc2c(F)cc(Oc3c4c(ncc3)cc(OC)c(OC)c4)cc2)ccc(F)c1	4.56974	81.71	469.419	81.71	0
ALK	ALK_30362749	Fluorescent ligand-binding assay	J Am Chem Soc.	Binding Kinetics Survey of the Drugged Kinome	30362749	Kinase	NA	LDN193189	N1(c2ccc(C3=Cn4ncc(-c5c6c(ncc5)cccc6)c4N=C3)cc2)CCNCC1	5.39	-4.74	0.62	literature	N1(c2ccc(C3=Cn4ncc(-c5c6c(ncc5)cccc6)c4N=C3)cc2)CCNCC1	3.039	58.34	406.493	58.35	0
ALK	ALK_30362749	Fluorescent ligand-binding assay	J Am Chem Soc.	Binding Kinetics Survey of the Drugged Kinome	30362749	Kinase	NA	LY2603618 (IC-83)	Brc1c(C)cc(OC[C@H]2OCCNC2)c(NC(=O)Nc2ncc(C)nc2)c1	4.94	-4.21	0.73	literature	Brc1c(C)cc(OC[C@H]2OCCNC2)c(NC(=O)Nc2ncc(C)nc2)c1	1.30653	97.4	436.31	97.4	2
ALK	ALK_30362749	Fluorescent ligand-binding assay	J Am Chem Soc.	Binding Kinetics Survey of the Drugged Kinome	30362749	Kinase	NA	LY2784544	Clc1cc(F)c(Cc2c(C)nc3C(CN4CCOCC4)=CC(Nc4n[nH]c(C)c4)=Nn23)cc1	7.8	-6.98	0.82	literature	Clc1cc(F)c(Cc2c(C)nc3C(CN4CCOCC4)=CC(Nc4n[nH]c(C)c4)=Nn23)cc1	3.368	83.36	469.952	83.37	2
ALK	ALK_30362749	Fluorescent ligand-binding assay	J Am Chem Soc.	Binding Kinetics Survey of the Drugged Kinome	30362749	Kinase	NA	Linifanib (ABT-869)	Fc1c(NC(=O)Nc2ccc(-c3c4c(N)n[nH]c4ccc3)cc2)cc(C)cc1	6.07	-4.81	1.27	literature	Fc1c(NC(=O)Nc2ccc(-c3c4c(N)n[nH]c4ccc3)cc2)cc(C)cc1	4.535	95.83	375.407	95.83	3
ALK	ALK_30362749	Fluorescent ligand-binding assay	J Am Chem Soc.	Binding Kinetics Survey of the Drugged Kinome	30362749	Kinase	NA	MGCD-265	S=C(NC(=O)Cc1ccc(F)cc1)Nc1cc(F)c(Oc2c3sc(-c4ncc(CNCCOC)cc4)cc3ncc2)cc1	5.17	-3.85	1.33	literature	S=C(NC(=O)Cc1ccc(F)cc1)Nc1cc(F)c(Oc2c3sc(-c4ncc(CNCCOC)cc4)cc3ncc2)cc1	5.155	129.49	619.717	97.4	2
ALK	ALK_30362749	Fluorescent ligand-binding assay	J Am Chem Soc.	Binding Kinetics Survey of the Drugged Kinome	30362749	Kinase	NA	MK-2206 2HCl	O=C1N2C(=NN1)c1c(nc(c(-c3ccccc3)c1)-c1ccc(C3(N)CCC3)cc1)C=C2	5.17	-4.36	0.86	literature	O=C1N2C(=NN1)c1c(nc(c(-c3ccccc3)c1)-c1ccc(C3(N)CCC3)cc1)C=C2	4.72	83.61	407.477	89.07	2
ALK	ALK_30362749	Fluorescent ligand-binding assay	J Am Chem Soc.	Binding Kinetics Survey of the Drugged Kinome	30362749	Kinase	NA	MK-5108 (VX-689)	Clc1c(F)c(OC2CCC(C(=O)O)(Cc3nc(Nc4sccn4)ccc3)CC2)ccc1	7.11	-6.6	0.52	literature	Clc1c(F)c(OC2CCC(C(=O)O)(Cc3nc(Nc4sccn4)ccc3)CC2)ccc1	4.806	84.34	461.945	84.34	0
ALK	ALK_30362749	Fluorescent ligand-binding assay	J Am Chem Soc.	Binding Kinetics Survey of the Drugged Kinome	30362749	Kinase	NA	MLN8054	Clc1cc2C(c3c(F)cccc3F)=NCc3c(nc(Nc4ccc(C(=O)O)cc4)nc3)-c2cc1	5.5	-4.56	0.91	literature	Clc1cc2C(c3c(F)cccc3F)=NCc3c(nc(Nc4ccc(C(=O)O)cc4)nc3)-c2cc1	5.189	87.47	476.87	87.47	0
ALK	ALK_30362749	Fluorescent ligand-binding assay	J Am Chem Soc.	Binding Kinetics Survey of the Drugged Kinome	30362749	Kinase	NA	MLN8237 (Alisertib)	Clc1cc2C(c3c(F)cccc3OC)=NCc3c(nc(Nc4cc(OC)c(C(=O)O)cc4)nc3)-c2cc1	5.47	-4.48	0.96	literature	Clc1cc2C(c3c(F)cccc3OC)=NCc3c(nc(Nc4cc(OC)c(C(=O)O)cc4)nc3)-c2cc1	4.983	105.93	518.932	105.93	3
ALK	ALK_30362749	Fluorescent ligand-binding assay	J Am Chem Soc.	Binding Kinetics Survey of the Drugged Kinome	30362749	Kinase	NA	NVP-ADW742	O(Cc1ccccc1)c1cc(-c2c3c(N)ncnc3n(C3CC(CN4CCCC4)C3)c2)ccc1	5.95	-4.87	1.07	literature	O(Cc1ccccc1)c1cc(-c2c3c(N)ncnc3n(C3CC(CN4CCCC4)C3)c2)ccc1	5.319	69.2	453.59	69.2	0
ALK	ALK_30362749	Fluorescent ligand-binding assay	J Am Chem Soc.	Binding Kinetics Survey of the Drugged Kinome	30362749	Kinase	NA	NVP-BSK805	Fc1c(CN2CCOCC2)c(F)cc(-c2c3nc(-c4cn(C5CCNCC5)nc4)cnc3ccc2)c1	5.78	-4.57	1.21	literature	Fc1c(CN2CCOCC2)c(F)cc(-c2c3nc(-c4cn(C5CCNCC5)nc4)cnc3ccc2)c1	3.38953	68.1	490.558	68.1	0
ALK	ALK_30362749	Fluorescent ligand-binding assay	J Am Chem Soc.	Binding Kinetics Survey of the Drugged Kinome	30362749	Kinase	NA	NVP-TAE226	Clc1c(Nc2c(C(=O)NC)cccc2)nc(Nc2c(OC)cc(N3CCOCC3)cc2)nc1	7.95	-6.86	0.96	literature	Clc1c(Nc2c(C(=O)NC)cccc2)nc(Nc2c(OC)cc(N3CCOCC3)cc2)nc1	2.424	100.64	468.945	100.64	0
ALK	ALK_30362749	Fluorescent ligand-binding assay	J Am Chem Soc.	Binding Kinetics Survey of the Drugged Kinome	30362749	Kinase	NA	PD 0332991 (Palbociclib) HCl	O=C(C)C=1C(=O)N(C2CCCC2)c2nc(Nc3ncc(N4CCNCC4)cc3)ncc2C=1C	5.11	-4.06	1.07	literature	O=C(C)C=1C(=O)N(C2CCCC2)c2nc(Nc3ncc(N4CCNCC4)cc3)ncc2C=1C	1.161	103.35	447.543	105.04	0
ALK	ALK_30362749	Fluorescent ligand-binding assay	J Am Chem Soc.	Binding Kinetics Survey of the Drugged Kinome	30362749	Kinase	NA	PD153035 HCl	Brc1cc(Nc2ncnc3c2cc(OC)c(OC)c3)ccc1	5.5	-4.54	0.96	literature	Brc1cc(Nc2ncnc3c2cc(OC)c(OC)c3)ccc1	3.31974	56.27	360.211	56.27	0
ALK	ALK_30362749	Fluorescent ligand-binding assay	J Am Chem Soc.	Binding Kinetics Survey of the Drugged Kinome	30362749	Kinase	NA	PF-00562271	S(=O)(=O)(N(C)c1c(CNc2c(C(F)(F)F)cnc(Nc3cc4c(NC(=O)C4)cc3)n2)cccn1)C	7.13	-6.15	0.95	literature	S(=O)(=O)(N(C)c1c(CNc2c(C(F)(F)F)cnc(Nc3cc4c(NC(=O)C4)cc3)n2)cccn1)C	1.07576	129.21	507.497	129.21	0
ALK	ALK_30362749	Fluorescent ligand-binding assay	J Am Chem Soc.	Binding Kinetics Survey of the Drugged Kinome	30362749	Kinase	NA	PF-03814735	FC(F)(F)c1c(NC2CCC2)nc(Nc2cc3[C@@H]4N(C(=O)CNC(=O)C)[C@H](c3cc2)CC4)nc1	6.84	-6.46	0.38	literature	FC(F)(F)c1c(NC2CCC2)nc(Nc2cc3[C@@H]4N(C(=O)CNC(=O)C)[C@H](c3cc2)CC4)nc1	2.73576	99.25	474.487	99.25	0
ALK	ALK_30362749	Fluorescent ligand-binding assay	J Am Chem Soc.	Binding Kinetics Survey of the Drugged Kinome	30362749	Kinase	NA	PHA-665752	Clc1c(CS(=O)(=O)c2cc3/C(=C/c4c(C)c(C(=O)N5[C@@H](CN6CCCC6)CCC5)c(C)[nH]4)/C(=O)Nc3cc2)c(Cl)ccc1	5.67	-4.95	0.69	literature	Clc1c(CS(=O)(=O)c2cc3/C(=C/c4c(C)c(C(=O)N5[C@@H](CN6CCCC6)CCC5)c(C)[nH]4)/C(=O)Nc3cc2)c(Cl)ccc1	5.282	102.58	641.62	102.58	0
ALK	ALK_30362749	Fluorescent ligand-binding assay	J Am Chem Soc.	Binding Kinetics Survey of the Drugged Kinome	30362749	Kinase	NA	PHA-680632	O=C(Nc1c(CC)cccc1CC)N1Cc2c(NC(=O)c3ccc(N4CCN(C)CC4)cc3)n[nH]c2C1	6.05	-5	1.05	literature	O=C(Nc1c(CC)cccc1CC)N1Cc2c(NC(=O)c3ccc(N4CCN(C)CC4)cc3)n[nH]c2C1	3.374	96.6	501.635	96.6	0
ALK	ALK_30362749	Fluorescent ligand-binding assay	J Am Chem Soc.	Binding Kinetics Survey of the Drugged Kinome	30362749	Kinase	NA	PIK-75	BrC1=Cn2c(/C=N/N(S(=O)(=O)c3c(C)ccc([N+](=O)[O-])c3)C)cnc2C=C1	6.35	-5.86	0.76	literature	BrC1=Cn2c(/C=N/N(S(=O)(=O)c3c(C)ccc([N+](=O)[O-])c3)C)cnc2C=C1	3.093	113.38	452.289	110.18	0
ALK	ALK_30362749	Fluorescent ligand-binding assay	J Am Chem Soc.	Binding Kinetics Survey of the Drugged Kinome	30362749	Kinase	NA	PP-121	Nc1ncnc2n(C3CCCC3)nc(-c3cnc4[nH]ccc4c3)c12	6.16	-5.21	0.94	literature	Nc1ncnc2n(C3CCCC3)nc(-c3cnc4[nH]ccc4c3)c12	1.75553	98.3	319.372	98.3	0
ALK	ALK_30362749	Fluorescent ligand-binding assay	J Am Chem Soc.	Binding Kinetics Survey of the Drugged Kinome	30362749	Kinase	NA	PP242	Oc1cc2c([nH]c(-c3nn(C(C)C)c4ncnc(N)c34)c2)cc1	5.45	-4.29	1.17	literature	Oc1cc2c([nH]c(-c3nn(C(C)C)c4ncnc(N)c34)c2)cc1	1.92806	105.64	308.345	105.64	0
ALK	ALK_30362749	Fluorescent ligand-binding assay	J Am Chem Soc.	Binding Kinetics Survey of the Drugged Kinome	30362749	Kinase	NA	Pazopanib HCl	S(=O)(=O)(N)c1c(C)ccc(Nc2nc(N(C)c3cc4nn(C)c(C)c4cc3)ccn2)c1	5.98	-5.06	0.92	literature	S(=O)(=O)(N)c1c(C)ccc(Nc2nc(N(C)c3cc4nn(C)c(C)c4cc3)ccn2)c1	1.865	119.03	437.528	119.03	4
ALK	ALK_30362749	Fluorescent ligand-binding assay	J Am Chem Soc.	Binding Kinetics Survey of the Drugged Kinome	30362749	Kinase	NA	Pelitinib (EKB-569)	Clc1c(F)ccc(Nc2c(C#N)cnc3c2cc(NC(=O)/C=C/CN(C)C)c(OCC)c3)c1	5.54	-4.42	1.13	literature	Clc1c(F)ccc(Nc2c(C#N)cnc3c2cc(NC(=O)/C=C/CN(C)C)c(OCC)c3)c1	3.98	90.28	467.932	90.28	0
ALK	ALK_30362749	Fluorescent ligand-binding assay	J Am Chem Soc.	Binding Kinetics Survey of the Drugged Kinome	30362749	Kinase	NA	Ponatinib (AP24534)	FC(F)(F)c1c(CN2CCN(C)CC2)ccc(NC(=O)c2cc(C#Cc3n4N=CC=Cc4nc3)c(C)cc2)c1	5.34	-4.55	0.78	literature	FC(F)(F)c1c(CN2CCN(C)CC2)ccc(NC(=O)c2cc(C#Cc3n4N=CC=Cc4nc3)c(C)cc2)c1	4.88476	65.76	532.57	65.77	4
ALK	ALK_30362749	Fluorescent ligand-binding assay	J Am Chem Soc.	Binding Kinetics Survey of the Drugged Kinome	30362749	Kinase	NA	R406	Fc1c(Nc2nc3NC(=O)C(C)(C)Oc3cc2)nc(Nc2cc(OC)c(OC)c(OC)c2)nc1	5.17	-4.1	1.11	literature	Fc1c(Nc2nc3NC(=O)C(C)(C)Oc3cc2)nc(Nc2cc(OC)c(OC)c(OC)c2)nc1	1.87148	128.75	470.461	128.75	2
ALK	ALK_30362749	Fluorescent ligand-binding assay	J Am Chem Soc.	Binding Kinetics Survey of the Drugged Kinome	30362749	Kinase	NA	R788 (Fostamatinib) - prodrug	P(=O)(OCN1C(=O)C(C)(C)Oc2c1nc(Nc1c(F)cnc(Nc3cc(OC)c(OC)c(OC)c3)n1)cc2)(O)O	5.34	-4.7	0.84	literature	P(=O)(OCN1C(=O)C(C)(C)Oc2c1nc(Nc1c(F)cnc(Nc3cc(OC)c(OC)c(OC)c3)n1)cc2)(O)O	0.59748	186.72	580.466	186.72	4
ALK	ALK_30362749	Fluorescent ligand-binding assay	J Am Chem Soc.	Binding Kinetics Survey of the Drugged Kinome	30362749	Kinase	NA	Roscovitine (Seliciclib - CYC202)	OC[C@H](Nc1nc(NCc2ccccc2)c2ncn(C(C)C)c2n1)CC	5.47	-4.52	0.95	literature	OC[C@H](Nc1nc(NCc2ccccc2)c2ncn(C(C)C)c2n1)CC	2.94206	87.89	354.458	87.89	0
ALK	ALK_30362749	Fluorescent ligand-binding assay	J Am Chem Soc.	Binding Kinetics Survey of the Drugged Kinome	30362749	Kinase	NA	Ruxolitinib (INCB018424)	N#CC[C@@H](n1ncc(-c2ncnc3[nH]ccc23)c1)C1CCCC1	5.68	-4.86	0.85	literature	N#CC[C@@H](n1ncc(-c2ncnc3[nH]ccc23)c1)C1CCCC1	1.24	83.18	306.373	83.18	4
ALK	ALK_30362749	Fluorescent ligand-binding assay	J Am Chem Soc.	Binding Kinetics Survey of the Drugged Kinome	30362749	Kinase	NA	SB590885	O(CCN(C)C)c1ccc(-c2[nH]c(c(-c3cc4c(/C(=N/O)/CC4)cc3)n2)-c2ccncc2)cc1	5.21	-4.15	1.08	literature	O(CCN(C)C)c1ccc(-c2[nH]c(c(-c3cc4c(/C(=N/O)/CC4)cc3)n2)-c2ccncc2)cc1	3.916	86.63	453.546	86.63	0
ALK	ALK_30362749	Fluorescent ligand-binding assay	J Am Chem Soc.	Binding Kinetics Survey of the Drugged Kinome	30362749	Kinase	NA	SNS-314	Clc1cc(NC(=O)Nc2sc(CCNc3ncnc4c3scc4)cn2)ccc1	5.3	-4.37	0.92	literature	Clc1cc(NC(=O)Nc2sc(CCNc3ncnc4c3scc4)cn2)ccc1	2.83	91.83	430.944	91.83
ALK	ALK_30362749	Fluorescent ligand-binding assay	J Am Chem Soc.	Binding Kinetics Survey of the Drugged Kinome	30362749	Kinase	NA	SP600125	O=C1c2c3c([nH]nc3-c3c1cccc3)ccc2	5.58	-4.57	1.01	literature	O=C1c2c3c([nH]nc3-c3c1cccc3)ccc2	3.233	45.75	220.231	45.75	0
ALK	ALK_30362749	Fluorescent ligand-binding assay	J Am Chem Soc.	Binding Kinetics Survey of the Drugged Kinome	30362749	Kinase	NA	SU11274	Clc1cc(N(S(=O)(=O)c2cc3/C(=C/c4c(C)c(C(=O)N5CCN(C)CC5)c(C)[nH]4)/C(=O)Nc3cc2)C)ccc1	5.41	-4.59	0.82	literature	Clc1cc(N(S(=O)(=O)c2cc3/C(=C/c4c(C)c(C(=O)N5CCN(C)CC5)c(C)[nH]4)/C(=O)Nc3cc2)C)ccc1	2.608	105.82	568.098	105.82	0
ALK	ALK_30362749	Fluorescent ligand-binding assay	J Am Chem Soc.	Binding Kinetics Survey of the Drugged Kinome	30362749	Kinase	NA	Saracatinib (AZD0530)	Clc1c(Nc2ncnc3c2c(OC2CCOCC2)cc(OCCN2CCN(C)CC2)c3)c2OCOc2cc1	5.54	-4.62	0.94	literature	Clc1c(Nc2ncnc3c2c(OC2CCOCC2)cc(OCCN2CCN(C)CC2)c3)c2OCOc2cc1	2.962	90.44	542.036	90.44	3
ALK	ALK_30362749	Fluorescent ligand-binding assay	J Am Chem Soc.	Binding Kinetics Survey of the Drugged Kinome	30362749	Kinase	NA	Semaxanib (SU5416)	O=C1/C(=C\c2c(C)cc(C)[nH]2)/c2c(N1)cccc2	6.34	-5.03	1.32	literature	O=C1/C(=C\c2c(C)cc(C)[nH]2)/c2c(N1)cccc2	2.562	44.89	238.29	44.89	3
ALK	ALK_30362749	Fluorescent ligand-binding assay	J Am Chem Soc.	Binding Kinetics Survey of the Drugged Kinome	30362749	Kinase	NA	Staurosporine	O(C)[C@@H]1[C@H](NC)C[C@H]2O[C@]1(C)n1c3c4n2c2c(c4c4C(=O)NCc4c3c3c1cccc3)cccc2	8.51	-7.04	1.24	literature	O(C)[C@@H]1[C@H](NC)C[C@H]2O[C@]1(C)n1c3c4n2c2c(c4c4C(=O)NCc4c3c3c1cccc3)cccc2	6.35953	69.45	466.541	69.45	0
ALK	ALK_30362749	Fluorescent ligand-binding assay	J Am Chem Soc.	Binding Kinetics Survey of the Drugged Kinome	30362749	Kinase	NA	Sunitinib Malate (Sutent)	Fc1cc2/C(=C/c3c(C)c(C(=O)NCCN(CC)CC)c(C)[nH]3)/C(=O)Nc2cc1.O=C(O)[C@@H](O)CC(=O)O	6.83	-6.12	0.74	literature	Fc1cc2/C(=C/c3c(C)c(C(=O)NCCN(CC)CC)c(C)[nH]3)/C(=O)Nc2cc1	2.569	77.23	398.482	77.23	0
ALK	ALK_30362749	Fluorescent ligand-binding assay	J Am Chem Soc.	Binding Kinetics Survey of the Drugged Kinome	30362749	Kinase	NA	TAE684 (NVP-TAE684)	Clc1c(Nc2c(S(=O)(=O)C(C)C)cccc2)nc(Nc2c(OC)cc(N3CCC(N4CCN(C)CC4)CC3)cc2)nc1	9.62	-7.59	2.03	literature	Clc1c(Nc2c(S(=O)(=O)C(C)C)cccc2)nc(Nc2c(OC)cc(N3CCC(N4CCN(C)CC4)CC3)cc2)nc1	3.959	102.93	614.215	102.93	0
ALK	ALK_30362749	Fluorescent ligand-binding assay	J Am Chem Soc.	Binding Kinetics Survey of the Drugged Kinome	30362749	Kinase	NA	TAK-901	S(=O)(=O)(CC)c1cc(-c2c3c(c(C)c(C(=O)NC4CCN(C)CC4)c2)[nH]c2ncc(C)cc32)ccc1	7.62	-6.45	1.17	literature	S(=O)(=O)(CC)c1cc(-c2c3c(c(C)c(C(=O)NC4CCN(C)CC4)c2)[nH]c2ncc(C)cc32)ccc1	4.722	95.16	504.655	95.16	1
ALK	ALK_30362749	Fluorescent ligand-binding assay	J Am Chem Soc.	Binding Kinetics Survey of the Drugged Kinome	30362749	Kinase	NA	TG101209	S(=O)(=O)(NC(C)(C)C)c1cc(Nc2c(C)cnc(Nc3ccc(N4CCN(C)CC4)cc3)n2)ccc1	6.23	-5.19	1.01	literature	S(=O)(=O)(NC(C)(C)C)c1cc(Nc2c(C)cnc(Nc3ccc(N4CCN(C)CC4)cc3)n2)ccc1	3.143	102.49	509.679	102.49	0
ALK	ALK_30362749	Fluorescent ligand-binding assay	J Am Chem Soc.	Binding Kinetics Survey of the Drugged Kinome	30362749	Kinase	NA	TG101348 (SAR302503)	S(=O)(=O)(NC(C)(C)C)c1cc(Nc2c(C)cnc(Nc3ccc(OCCN4CCCC4)cc3)n2)ccc1	5.99	-4.78	1.22	literature	S(=O)(=O)(NC(C)(C)C)c1cc(Nc2c(C)cnc(Nc3ccc(OCCN4CCCC4)cc3)n2)ccc1	4.068	108.48	524.69	108.48	3
ALK	ALK_30362749	Fluorescent ligand-binding assay	J Am Chem Soc.	Binding Kinetics Survey of the Drugged Kinome	30362749	Kinase	NA	TPCA-1	Fc1ccc(-c2sc(NC(=O)N)c(C(=O)N)c2)cc1	5.66	-4.78	0.87	literature	Fc1ccc(-c2sc(NC(=O)N)c(C(=O)N)c2)cc1	1.318	98.21	279.295	98.21	0
ALK	ALK_30362749	Fluorescent ligand-binding assay	J Am Chem Soc.	Binding Kinetics Survey of the Drugged Kinome	30362749	Kinase	NA	TSU-68 (SU6668)	O=C(O)CCc1c(C)c(/C=C/2\C(=O)Nc3c\2cccc3)[nH]c1C	6.58	-5.41	1.17	literature	O=C(O)CCc1c(C)c(/C=C/2\C(=O)Nc3c\2cccc3)[nH]c1C	2.374	82.19	310.353	82.19	0
ALK	ALK_30362749	Fluorescent ligand-binding assay	J Am Chem Soc.	Binding Kinetics Survey of the Drugged Kinome	30362749	Kinase	NA	Tivozanib (AV-951)	Clc1c(NC(=O)Nc2noc(C)c2)ccc(Oc2c3c(ncc2)cc(OC)c(OC)c3)c1	5.58	-4.43	1.15	literature	Clc1c(NC(=O)Nc2noc(C)c2)ccc(Oc2c3c(ncc2)cc(OC)c(OC)c3)c1	3.61574	107.74	454.87	107.74	3
ALK	ALK_30362749	Fluorescent ligand-binding assay	J Am Chem Soc.	Binding Kinetics Survey of the Drugged Kinome	30362749	Kinase	NA	Torin 1	FC(F)(F)c1c(N2CCN(C(=O)CC)CC2)ccc(N2C(=O)C=Cc3c2c2c(nc3)ccc(-c3cnc4c(c3)cccc4)c2)c1	5.1	-4.26	0.87	literature	FC(F)(F)c1c(N2CCN(C(=O)CC)CC2)ccc(N2C(=O)C=Cc3c2c2c(nc3)ccc(-c3cnc4c(c3)cccc4)c2)c1	6.27576	69.64	607.636	71.33	0
ALK	ALK_30362749	Fluorescent ligand-binding assay	J Am Chem Soc.	Binding Kinetics Survey of the Drugged Kinome	30362749	Kinase	NA	Torin 2	FC(F)(F)c1cc(N2C(=O)C=Cc3c2c2c(nc3)ccc(-c3cnc(N)cc3)c2)ccc1	5.19	-4.15	1.07	literature	FC(F)(F)c1cc(N2C(=O)C=Cc3c2c2c(nc3)ccc(-c3cnc(N)cc3)c2)ccc1	5.05176	72.11	432.405	73.8	0
ALK	ALK_30362749	Fluorescent ligand-binding assay	J Am Chem Soc.	Binding Kinetics Survey of the Drugged Kinome	30362749	Kinase	NA	Tyrphostin AG 879 (AG 879)	S=C(N)/C(/C#N)=C/c1cc(C(C)(C)C)c(O)c(C(C)(C)C)c1	5.61	-3.95	2.13	literature	S=C(N)/C(/C#N)=C/c1cc(C(C)(C)C)c(O)c(C(C)(C)C)c1	3.885	102.13	316.469	70.04	0
ALK	ALK_30362749	Fluorescent ligand-binding assay	J Am Chem Soc.	Binding Kinetics Survey of the Drugged Kinome	30362749	Kinase	NA	VX-680 (MK-0457 - Tozasertib)	S(c1nc(Nc2n[nH]c(C)c2)cc(N2CCN(C)CC2)n1)c1ccc(NC(=O)C2CC2)cc1	5.42	-4.64	0.77	literature	S(c1nc(Nc2n[nH]c(C)c2)cc(N2CCN(C)CC2)n1)c1ccc(NC(=O)C2CC2)cc1	2.586	102.07	464.598	102.07	2
ALK	ALK_30362749	Fluorescent ligand-binding assay	J Am Chem Soc.	Binding Kinetics Survey of the Drugged Kinome	30362749	Kinase	NA	Vandetanib (Zactima)	Brc1cc(F)c(Nc2ncnc3c2cc(OC)c(OCC2CCN(C)CC2)c3)cc1	5.91	-4.7	1.22	literature	Brc1cc(F)c(Nc2ncnc3c2cc(OC)c(OCC2CCN(C)CC2)c3)cc1	4.16674	59.51	475.362	59.51	4
ALK	ALK_30362749	Fluorescent ligand-binding assay	J Am Chem Soc.	Binding Kinetics Survey of the Drugged Kinome	30362749	Kinase	NA	WHI-P154	Brc1c(O)ccc(Nc2ncnc3c2cc(OC)c(OC)c3)c1	6.58	-5.49	1.1	literature	Brc1c(O)ccc(Nc2ncnc3c2cc(OC)c(OC)c3)c1	3.00974	76.5	376.21	76.5	0
ALK	ALK_30362749	Fluorescent ligand-binding assay	J Am Chem Soc.	Binding Kinetics Survey of the Drugged Kinome	30362749	Kinase	NA	WZ3146	Clc1c(Oc2cc(NC(=O)C=C)ccc2)nc(Nc2ccc(N3CCN(C)CC3)cc2)nc1	5.82	-4.78	1.04	literature	Clc1c(Oc2cc(NC(=O)C=C)ccc2)nc(Nc2ccc(N3CCN(C)CC3)cc2)nc1	3.187	82.62	464.957	82.62	0
ALK	ALK_30362749	Fluorescent ligand-binding assay	J Am Chem Soc.	Binding Kinetics Survey of the Drugged Kinome	30362749	Kinase	NA	WZ4002	Clc1c(Oc2cc(NC(=O)C=C)ccc2)nc(Nc2c(OC)cc(N3CCN(C)CC3)cc2)nc1	6.61	-5.73	1.03	literature	Clc1c(Oc2cc(NC(=O)C=C)ccc2)nc(Nc2c(OC)cc(N3CCN(C)CC3)cc2)nc1	3.178	91.85	494.983	91.85	0
ALK	ALK_30362749	Fluorescent ligand-binding assay	J Am Chem Soc.	Binding Kinetics Survey of the Drugged Kinome	30362749	Kinase	NA	WZ8040	Clc1c(Sc2cc(NC(=O)C=C)ccc2)nc(Nc2ccc(N3CCN(C)CC3)cc2)nc1	6.14	-4.92	1.21	literature	Clc1c(Sc2cc(NC(=O)C=C)ccc2)nc(Nc2ccc(N3CCN(C)CC3)cc2)nc1	3.823	73.39	481.024	73.39	0
ALK	ALK_30362749	Fluorescent ligand-binding assay	J Am Chem Soc.	Binding Kinetics Survey of the Drugged Kinome	30362749	Kinase	NA	XL-184 (Cabozantinib)	Fc1ccc(NC(=O)C2(C(=O)Nc3ccc(Oc4c5c(ncc4)cc(OC)c(OC)c5)cc3)CC2)cc1	6.15	-5.54	0.57	literature	Fc1ccc(NC(=O)C2(C(=O)Nc3ccc(Oc4c5c(ncc4)cc(OC)c(OC)c5)cc3)CC2)cc1	4.52074	98.78	501.514	98.78	4
ALK	ALK_30362749	Fluorescent ligand-binding assay	J Am Chem Soc.	Binding Kinetics Survey of the Drugged Kinome	30362749	Kinase	NA	ZM-447439	O=C(Nc1ccc(Nc2ncnc3c2cc(OC)c(OCCCN2CCOCC2)c3)cc1)c1ccccc1	5.5	-4.76	0.7	literature	O=C(Nc1ccc(Nc2ncnc3c2cc(OC)c(OCCCN2CCOCC2)c3)cc1)c1ccccc1	3.32274	97.84	513.598	97.84	0
AurA	AurA_30362749	Fluorescent ligand-binding assay	J Am Chem Soc.	Binding Kinetics Survey of the Drugged Kinome	30362749	Kinase	NA	A-674563	O(C[C@@H](N)Cc1ccccc1)c1cc(-c2cc3c(C)n[nH]c3cc2)cnc1	6	-3.55	2.46	literature	O(C[C@@H](N)Cc1ccccc1)c1cc(-c2cc3c(C)n[nH]c3cc2)cnc1	3.865	76.82	358.445	76.82	0
AurA	AurA_30362749	Fluorescent ligand-binding assay	J Am Chem Soc.	Binding Kinetics Survey of the Drugged Kinome	30362749	Kinase	NA	AEE788 (NVP-AEE788)	N([C@H](C)c1ccccc1)c1ncnc2[nH]c(-c3ccc(CN4CCN(CC)CC4)cc3)cc12	6.5	-4.5	2	literature	N([C@H](C)c1ccccc1)c1ncnc2[nH]c(-c3ccc(CN4CCN(CC)CC4)cc3)cc12	4.119	60.08	440.595	60.08	0
AurA	AurA_30362749	Fluorescent ligand-binding assay	J Am Chem Soc.	Binding Kinetics Survey of the Drugged Kinome	30362749	Kinase	NA	AMG458	O=C(Nc1ncc(Oc2c3c(ncc2)cc(OC)cc3)cc1)C=1C(=O)N(N(CC(O)(C)C)C=1C)c1ccccc1	6.33	-4.3	2.02	literature	O=C(Nc1ncc(Oc2c3c(ncc2)cc(OC)cc3)cc1)C=1C(=O)N(N(CC(O)(C)C)C=1C)c1ccccc1	3.265	117.12	539.592	120.5	0
AurA	AurA_30362749	Fluorescent ligand-binding assay	J Am Chem Soc.	Binding Kinetics Survey of the Drugged Kinome	30362749	Kinase	NA	AS-252424	Fc1cc(O)c(-c2oc(/C=C\3/C(=O)NC(=O)S/3)cc2)cc1	5.5	-3.32	2.19	literature	Fc1cc(O)c(-c2oc(/C=C\3/C(=O)NC(=O)S/3)cc2)cc1	2.947	79.54	305.285	79.54	0
AurA	AurA_30362749	Fluorescent ligand-binding assay	J Am Chem Soc.	Binding Kinetics Survey of the Drugged Kinome	30362749	Kinase	NA	AT7867	Clc1ccc(C2(c3ccc(-c4c[nH]nc4)cc3)CCNCC2)cc1	6.19	-4.2	1.99	literature	Clc1ccc(C2(c3ccc(-c4c[nH]nc4)cc3)CCNCC2)cc1	5.426	40.71	337.854	40.71	0
AurA	AurA_30362749	Fluorescent ligand-binding assay	J Am Chem Soc.	Binding Kinetics Survey of the Drugged Kinome	30362749	Kinase	NA	AT9283	O=C(Nc1c(-c2[nH]c3c(n2)cc(CN2CCOCC2)cc3)n[nH]c1)NC1CC1	9.1	-6.55	2.56	literature	O=C(Nc1c(-c2[nH]c3c(n2)cc(CN2CCOCC2)cc3)n[nH]c1)NC1CC1	1.13706	110.96	381.44	110.96
AurA	AurA_30362749	Fluorescent ligand-binding assay	J Am Chem Soc.	Binding Kinetics Survey of the Drugged Kinome	30362749	Kinase	NA	AZ 960	Fc1c(Nc2n[nH]c(C)c2)nc(N[C@@H](C)c2ccc(F)cc2)c(C#N)c1	8.95	-6.55	2.4	literature	Fc1c(Nc2n[nH]c(C)c2)nc(N[C@@H](C)c2ccc(F)cc2)c(C#N)c1	3.894	89.42	354.364	89.42	0
AurA	AurA_30362749	Fluorescent ligand-binding assay	J Am Chem Soc.	Binding Kinetics Survey of the Drugged Kinome	30362749	Kinase	NA	AZD4547	O=C(Nc1n[nH]c(CCc2cc(OC)cc(OC)c2)c1)c1ccc(N2C[C@@H](C)N[C@@H](C)C2)cc1	7.51	-5.47	2.04	literature	O=C(Nc1n[nH]c(CCc2cc(OC)cc(OC)c2)c1)c1ccc(N2C[C@@H](C)N[C@@H](C)C2)cc1	3.948	91.51	463.582	91.51	2
AurA	AurA_30362749	Fluorescent ligand-binding assay	J Am Chem Soc.	Binding Kinetics Survey of the Drugged Kinome	30362749	Kinase	NA	AZD5438	S(=O)(=O)(C)c1ccc(Nc2nc(-c3n(C(C)C)c(C)nc3)ccn2)cc1	7.23	-5.53	1.69	literature	S(=O)(=O)(C)c1ccc(Nc2nc(-c3n(C(C)C)c(C)nc3)ccn2)cc1	1.81453	89.77	371.465	89.77	0
AurA	AurA_30362749	Fluorescent ligand-binding assay	J Am Chem Soc.	Binding Kinetics Survey of the Drugged Kinome	30362749	Kinase	NA	AZD7762	Fc1cc(-c2sc(C(=O)N[C@@H]3CNCCC3)c(NC(=O)N)c2)ccc1	7.27	-5.16	2.11	literature	Fc1cc(-c2sc(C(=O)N[C@@H]3CNCCC3)c(NC(=O)N)c2)ccc1	1.64	96.25	362.429	96.25	0
AurA	AurA_30362749	Fluorescent ligand-binding assay	J Am Chem Soc.	Binding Kinetics Survey of the Drugged Kinome	30362749	Kinase	NA	Apatinib (YN968D1)	S(=O)(=O)([O-])C.O=C(Nc1ccc(C2(C#N)CCCC2)cc1)c1c([N+H2]c2c(C)ccnc2)nccc1	5.96	-3.12	2.82	literature	O=C(Nc1ccc(C2(C#N)CCCC2)cc1)c1c(Nc2c(C)ccnc2)nccc1	3.989	90.7	397.482	90.7
AurA	AurA_30362749	Fluorescent ligand-binding assay	J Am Chem Soc.	Binding Kinetics Survey of the Drugged Kinome	30362749	Kinase	NA	Aurora A Inhibitor I	Clc1c(NC(=O)c2ccc(Nc3c(F)cnc(Nc4ccc(CC(=O)N5CCN(CC)CC5)cc4)n3)cc2)cccc1	9.42	-6.81	2.61	literature	Clc1c(NC(=O)c2ccc(Nc3c(F)cnc(Nc4ccc(CC(=O)N5CCN(CC)CC5)cc4)n3)cc2)cccc1	4.209	102.49	588.087	102.49	0
AurA	AurA_30362749	Fluorescent ligand-binding assay	J Am Chem Soc.	Binding Kinetics Survey of the Drugged Kinome	30362749	Kinase	NA	Axitinib	S(c1c(C(=O)NC)cccc1)c1cc2[nH]nc(/C=C/c3ncccc3)c2cc1	8.23	-6.41	1.96	literature	S(c1c(C(=O)NC)cccc1)c1cc2[nH]nc(/C=C/c3ncccc3)c2cc1	4.643	70.67	386.479	70.67	0
AurA	AurA_30362749	Fluorescent ligand-binding assay	J Am Chem Soc.	Binding Kinetics Survey of the Drugged Kinome	30362749	Kinase	NA	BIX 02188	O=C(N)c1cc2NC(=O)/C(=C(\Nc3cc(CN(C)C)ccc3)/c3ccccc3)/c2cc1	5.66	-3.51	2.15	literature	O=C(N)c1cc2NC(=O)/C(=C(\Nc3cc(CN(C)C)ccc3)/c3ccccc3)/c2cc1	3.831	87.46	412.493	87.46	0
AurA	AurA_30362749	Fluorescent ligand-binding assay	J Am Chem Soc.	Binding Kinetics Survey of the Drugged Kinome	30362749	Kinase	NA	BMS 777607	Clc1c(N)nccc1Oc1c(F)cc(NC(=O)C=2C(=O)N(c3ccc(F)cc3)C=CC=2OCC)cc1	6.81	-4.8	2.01	literature	Clc1c(N)nccc1Oc1c(F)cc(NC(=O)C=2C(=O)N(c3ccc(F)cc3)C=CC=2OCC)cc1	3.964	106.78	512.9	108.47	2
AurA	AurA_30362749	Fluorescent ligand-binding assay	J Am Chem Soc.	Binding Kinetics Survey of the Drugged Kinome	30362749	Kinase	NA	BMS 794833	Clc1c(N)nccc1Oc1c(F)cc(NC(=O)C=2C(=O)C(c3ccc(F)cc3)=CNC=2)cc1	5.47	-3.16	2.66	literature	Clc1c(N)nccc1Oc1c(F)cc(NC(=O)C=2C(=O)C(c3ccc(F)cc3)=CNC=2)cc1	3.076	106.34	468.847	110.1	0
AurA	AurA_30362749	Fluorescent ligand-binding assay	J Am Chem Soc.	Binding Kinetics Survey of the Drugged Kinome	30362749	Kinase	NA	BMS-599626 (AC480)	Fc1cc(Cn2ncc3c2ccc(NC2=NC=Nn4c2c(C)c(NC(=O)OC[C@H]2NCCOC2)c4)c3)ccc1	5.54	-3.52	2.03	literature	Fc1cc(Cn2ncc3c2ccc(NC2=NC=Nn4c2c(C)c(NC(=O)OC[C@H]2NCCOC2)c4)c3)ccc1	2.907	119.09	530.564	119.63	1
AurA	AurA_30362749	Fluorescent ligand-binding assay	J Am Chem Soc.	Binding Kinetics Survey of the Drugged Kinome	30362749	Kinase	NA	BX-795	Ic1c(NCCCNC(=O)c2sccc2)nc(Nc2cc(NC(=O)N3CCCC3)ccc2)nc1	8.99	-6.43	2.56	literature	Ic1c(NCCCNC(=O)c2sccc2)nc(Nc2cc(NC(=O)N3CCCC3)ccc2)nc1	3.106	111.28	591.478	111.28	0
AurA	AurA_30362749	Fluorescent ligand-binding assay	J Am Chem Soc.	Binding Kinetics Survey of the Drugged Kinome	30362749	Kinase	NA	BX-912	Brc1c(NCCc2[nH]cnc2)nc(Nc2cc(NC(=O)N3CCCC3)ccc2)nc1	8.39	-6.52	1.87	literature	Brc1c(NCCc2[nH]cnc2)nc(Nc2cc(NC(=O)N3CCCC3)ccc2)nc1	1.234	110.86	471.363	110.86	0
AurA	AurA_30362749	Fluorescent ligand-binding assay	J Am Chem Soc.	Binding Kinetics Survey of the Drugged Kinome	30362749	Kinase	NA	Barasertib (AZD1152-HQPA)	P(=O)(OCCN(CCCOc1cc2ncnc(Nc3[nH]nc(CC(=O)Nc4cc(F)ccc4)c3)c2cc1)CC)(O)O	7.79	-5.86	1.93	literature	P(=O)(OCCN(CCCOc1cc2ncnc(Nc3[nH]nc(CC(=O)Nc4cc(F)ccc4)c3)c2cc1)CC)(O)O	1.886	174.82	587.549	174.82
AurA	AurA_30362749	Fluorescent ligand-binding assay	J Am Chem Soc.	Binding Kinetics Survey of the Drugged Kinome	30362749	Kinase	NA	Baricitinib (LY3009104 - incb28050)	S(=O)(=O)(CC)N1CC(CC#N)(n2ncc(-c3ncnc4[nH]ccc34)c2)C1	6.45	-4.4	2.05	literature	S(=O)(=O)(CC)N1CC(CC#N)(n2ncc(-c3ncnc4[nH]ccc34)c2)C1	-1.528	120.56	371.425	120.56	4
AurA	AurA_30362749	Fluorescent ligand-binding assay	J Am Chem Soc.	Binding Kinetics Survey of the Drugged Kinome	30362749	Kinase	NA	CCT128930	O=C(Nc1sc(c(C)n1)-c1nc(C(C)(C)C)sc1)N1[C@H](C(=O)N)CCC1	5.59	-3.45	2.14	literature	O=C(Nc1sc(c(C)n1)-c1nc(C(C)(C)C)sc1)N1[C@H](C(=O)N)CCC1	1.646	101.21	393.536	101.21	0
AurA	AurA_30362749	Fluorescent ligand-binding assay	J Am Chem Soc.	Binding Kinetics Survey of the Drugged Kinome	30362749	Kinase	NA	CCT129202	Clc1c(N2CCN(CC(=O)Nc3sccn3)CC2)c2[nH]c(-c3ccc(N(C)C)cc3)nc2nc1	8.4	-6.24	2.17	literature	Clc1c(N2CCN(CC(=O)Nc3sccn3)CC2)c2[nH]c(-c3ccc(N(C)C)cc3)nc2nc1	1.99653	93.28	497.027	93.28
AurA	AurA_30362749	Fluorescent ligand-binding assay	J Am Chem Soc.	Binding Kinetics Survey of the Drugged Kinome	30362749	Kinase	NA	CEP33779	S(=O)(=O)(C)c1ccc(C=2c3n(nc(Nc4cc(N5CCN(C)CC5)ccc4)n3)C=CC=2)cc1	6.65	-4.61	2.04	literature	S(=O)(=O)(C)c1ccc(C=2c3n(nc(Nc4cc(N5CCN(C)CC5)ccc4)n3)C=CC=2)cc1	1.624	83.36	462.578	82.84	0
AurA	AurA_30362749	Fluorescent ligand-binding assay	J Am Chem Soc.	Binding Kinetics Survey of the Drugged Kinome	30362749	Kinase	NA	CHIR-124	Clc1cc2C(N[C@H]3C4CCN(C3)CC4)=C(c3[nH]c4c(n3)cccc4)C(=O)Nc2cc1	6.25	-4.42	2.24	literature	Clc1cc2C(N[C@H]3C4CCN(C3)CC4)=C(c3[nH]c4c(n3)cccc4)C(=O)Nc2cc1	3.375	73.05	419.916	76.81	0
AurA	AurA_30362749	Fluorescent ligand-binding assay	J Am Chem Soc.	Binding Kinetics Survey of the Drugged Kinome	30362749	Kinase	NA	CI-1033 (Canertinib)	Clc1c(F)ccc(Nc2ncnc3c2cc(NC(=O)C=C)c(OCCCN2CCOCC2)c3)c1	5.92	-4.83	1.09	literature	Clc1c(F)ccc(Nc2ncnc3c2cc(NC(=O)C=C)c(OCCCN2CCOCC2)c3)c1	3.269	88.61	485.947	88.61	3
AurA	AurA_30362749	Fluorescent ligand-binding assay	J Am Chem Soc.	Binding Kinetics Survey of the Drugged Kinome	30362749	Kinase	NA	CP 673451	O(CCOc1cc2ncn(-c3nc4c(N5CCC(N)CC5)cccc4cc3)c2cc1)C	5.81	-3.87	1.92	literature	O(CCOc1cc2ncn(-c3nc4c(N5CCC(N)CC5)cccc4cc3)c2cc1)C	3.25174	78.43	417.513	78.43	0
AurA	AurA_30362749	Fluorescent ligand-binding assay	J Am Chem Soc.	Binding Kinetics Survey of the Drugged Kinome	30362749	Kinase	NA	CP-724714	O=C(NC/C=C/c1cc2c(Nc3cc(C)c(Oc4cnc(C)cc4)cc3)ncnc2cc1)COC	5.8	-3.56	2.23	literature	O=C(NC/C=C/c1cc2c(Nc3cc(C)c(Oc4cnc(C)cc4)cc3)ncnc2cc1)COC	3.616	98.26	469.545	98.26	0
AurA	AurA_30362749	Fluorescent ligand-binding assay	J Am Chem Soc.	Binding Kinetics Survey of the Drugged Kinome	30362749	Kinase	NA	CX-4945 (Silmitasertib)	Clc1cc(Nc2nc3c(c4c2ccnc4)ccc(C(=O)O)c3)ccc1	5.95	-3.79	2.16	literature	Clc1cc(Nc2nc3c(c4c2ccnc4)ccc(C(=O)O)c3)ccc1	4.223	75.11	349.777	75.11	2
AurA	AurA_30362749	Fluorescent ligand-binding assay	J Am Chem Soc.	Binding Kinetics Survey of the Drugged Kinome	30362749	Kinase	NA	CYC116	N(c1nc(-c2c(C)nc(N)s2)ccn1)c1ccc(N2CCOCC2)cc1	8.68	-6.43	2.25	literature	N(c1nc(-c2c(C)nc(N)s2)ccn1)c1ccc(N2CCOCC2)cc1	1.126	89.19	368.465	89.19	1
AurA	AurA_30362749	Fluorescent ligand-binding assay	J Am Chem Soc.	Binding Kinetics Survey of the Drugged Kinome	30362749	Kinase	NA	Cediranib (AZD2171)	Fc1c(Oc2ncnc3c2cc(OC)c(OCCCN2CCCC2)c3)ccc2[nH]c(C)cc12	5.83	-3.98	1.85	literature	Fc1c(Oc2ncnc3c2cc(OC)c(OCCCN2CCCC2)c3)ccc2[nH]c(C)cc12	4.21274	72.5	450.514	72.5	3
AurA	AurA_30362749	Fluorescent ligand-binding assay	J Am Chem Soc.	Binding Kinetics Survey of the Drugged Kinome	30362749	Kinase	NA	Crenolanib (CP-868596)	O(CC1(C)COC1)c1cc2ncn(-c3nc4c(N5CCC(N)CC5)cccc4cc3)c2cc1	6.14	-3.65	2.35	literature	O(CC1(C)COC1)c1cc2ncn(-c3nc4c(N5CCC(N)CC5)cccc4cc3)c2cc1	3.834	78.43	443.551	78.43	3
AurA	AurA_30362749	Fluorescent ligand-binding assay	J Am Chem Soc.	Binding Kinetics Survey of the Drugged Kinome	30362749	Kinase	NA	Crizotinib (PF-02341066)	Clc1c([C@H](Oc2c(N)ncc(-c3cn(C4CCNCC4)nc3)c2)C)c(Cl)ccc1F	7.61	-6.35	1.27	literature	Clc1c([C@H](Oc2c(N)ncc(-c3cn(C4CCNCC4)nc3)c2)C)c(Cl)ccc1F	4.175	77.99	450.345	77.99	0
AurA	AurA_30362749	Fluorescent ligand-binding assay	J Am Chem Soc.	Binding Kinetics Survey of the Drugged Kinome	30362749	Kinase	NA	Cyt387	O=C(NCC#N)c1ccc(-c2nc(Nc3ccc(N4CCOCC4)cc3)ncc2)cc1	7.5	-5.38	2.12	literature	O=C(NCC#N)c1ccc(-c2nc(Nc3ccc(N4CCOCC4)cc3)ncc2)cc1	1.468	103.17	414.469	103.17	3
AurA	AurA_30362749	Fluorescent ligand-binding assay	J Am Chem Soc.	Binding Kinetics Survey of the Drugged Kinome	30362749	Kinase	NA	Dabrafenib (GSK2118436)	S(=O)(=O)(Nc1c(F)c(-c2c(-c3nc(N)ncc3)sc(C(C)(C)C)n2)ccc1)c1c(F)cccc1F	7.55	-5.32	2.23	literature	S(=O)(=O)(Nc1c(F)c(-c2c(-c3nc(N)ncc3)sc(C(C)(C)C)n2)ccc1)c1c(F)cccc1F	4.291	110.86	519.572	110.86	4
AurA	AurA_30362749	Fluorescent ligand-binding assay	J Am Chem Soc.	Binding Kinetics Survey of the Drugged Kinome	30362749	Kinase	NA	Dasatinib (BMS-354825)	Clc1c(NC(=O)c2sc(Nc3nc(C)nc(N4CCN(CCO)CC4)c3)nc2)c(C)ccc1	6.41	-4.73	1.68	literature	Clc1c(NC(=O)c2sc(Nc3nc(C)nc(N4CCN(CCO)CC4)c3)nc2)c(C)ccc1	1.535	106.51	488.016	106.51	4
AurA	AurA_30362749	Fluorescent ligand-binding assay	J Am Chem Soc.	Binding Kinetics Survey of the Drugged Kinome	30362749	Kinase	NA	Desmethyl Erlotinib (CP-473420)	O(CCOc1c(OCCO)cc2c(Nc3cc(C#C)ccc3)ncnc2c1)C	6.45	-4.31	2.13	literature	O(CCOc1c(OCCO)cc2c(Nc3cc(C#C)ccc3)ncnc2c1)C	1.97548	85.73	379.416	85.73	0
AurA	AurA_30362749	Fluorescent ligand-binding assay	J Am Chem Soc.	Binding Kinetics Survey of the Drugged Kinome	30362749	Kinase	NA	Dovitinib (TKI-258)	Fc1c2C(N)=C(c3[nH]c4c(n3)ccc(N3CCN(C)CC3)c4)C(=O)Nc2ccc1	6.72	-5.06	1.66	literature	Fc1c2C(N)=C(c3[nH]c4c(n3)ccc(N3CCN(C)CC3)c4)C(=O)Nc2ccc1	1.59	90.28	392.438	94.04	3
AurA	AurA_30362749	Fluorescent ligand-binding assay	J Am Chem Soc.	Binding Kinetics Survey of the Drugged Kinome	30362749	Kinase	NA	E7080 (Lenvatinib)	Clc1c(NC(=O)NC2CC2)ccc(Oc2c3c(ncc2)cc(OC)c(C(=O)N)c3)c1	6.43	-4.38	2.05	literature	Clc1c(NC(=O)NC2CC2)ccc(Oc2c3c(ncc2)cc(OC)c(C(=O)N)c3)c1	2.902	115.57	426.86	115.57	0
AurA	AurA_30362749	Fluorescent ligand-binding assay	J Am Chem Soc.	Binding Kinetics Survey of the Drugged Kinome	30362749	Kinase	NA	ENMD-2076	N(c1nc(/C=C/c2ccccc2)nc(N2CCN(C)CC2)c1)c1n[nH]c(C)c1	8.63	-6.19	2.44	literature	N(c1nc(/C=C/c2ccccc2)nc(N2CCN(C)CC2)c1)c1n[nH]c(C)c1	2.969	72.97	375.48	72.97	0
AurA	AurA_30362749	Fluorescent ligand-binding assay	J Am Chem Soc.	Binding Kinetics Survey of the Drugged Kinome	30362749	Kinase	NA	Flavopiridol HCl	Clc1c(C=2Oc3c([C@@H]4[C@H](O)CN(C)CC4)c(O)cc(O)c3C(=O)C=2)cccc1	5.6	-3.13	2.47	literature	Clc1c(C=2Oc3c([C@@H]4[C@H](O)CN(C)CC4)c(O)cc(O)c3C(=O)C=2)cccc1	2.902	90.23	401.846	94.14	0
AurA	AurA_30362749	Fluorescent ligand-binding assay	J Am Chem Soc.	Binding Kinetics Survey of the Drugged Kinome	30362749	Kinase	NA	Foretinib (GSK1363089 - XL880)	Fc1c(Oc2c3c(ncc2)cc(OCCCN2CCOCC2)c(OC)c3)ccc(NC(=O)C2(C(=O)Nc3ccc(F)cc3)CC2)c1	7.3	-5.3	2	literature	Fc1c(Oc2c3c(ncc2)cc(OCCCN2CCOCC2)c(OC)c3)ccc(NC(=O)C2(C(=O)Nc3ccc(F)cc3)CC2)c1	4.59374	111.25	632.664	111.25	2
AurA	AurA_30362749	Fluorescent ligand-binding assay	J Am Chem Soc.	Binding Kinetics Survey of the Drugged Kinome	30362749	Kinase	NA	GDC-0941	S(=O)(=O)(C)N1CCN(Cc2sc3c(N4CCOCC4)nc(-c4c5c([nH]nc5)ccc4)nc3c2)CC1	5.72	-3.76	1.96	literature	S(=O)(=O)(C)N1CCN(Cc2sc3c(N4CCOCC4)nc(-c4c5c([nH]nc5)ccc4)nc3c2)CC1	0.888	107.55	513.647	107.55	0
AurA	AurA_30362749	Fluorescent ligand-binding assay	J Am Chem Soc.	Binding Kinetics Survey of the Drugged Kinome	30362749	Kinase	NA	GSK1059615	O=C1/C(=C/c2cc3c(-c4ccncc4)ccnc3cc2)/SC(=O)N1	5.68	-3.78	2	literature	O=C1/C(=C/c2cc3c(-c4ccncc4)ccnc3cc2)/SC(=O)N1	3.478	71.95	333.371	71.95	1
AurA	AurA_30362749	Fluorescent ligand-binding assay	J Am Chem Soc.	Binding Kinetics Survey of the Drugged Kinome	30362749	Kinase	NA	GSK1070916	O=C(N(C)C)Nc1ccc(-c2c(-c3c4c([nH]c(-c5cc(CN(C)C)ccc5)c4)ncc3)cn(CC)n2)cc1	8.58	-5.66	2.91	literature	O=C(N(C)C)Nc1ccc(-c2c(-c3c4c([nH]c(-c5cc(CN(C)C)ccc5)c4)ncc3)cn(CC)n2)cc1	4.46	82.08	507.642	82.08	1
AurA	AurA_30362749	Fluorescent ligand-binding assay	J Am Chem Soc.	Binding Kinetics Survey of the Drugged Kinome	30362749	Kinase	NA	Hesperadin	S(=O)(=O)(Nc1cc2/C(=C(/Nc3ccc(CN4CCCCC4)cc3)\c3ccccc3)/C(=O)Nc2cc1)CC	9.08	-6.85	2.24	literature	S(=O)(=O)(Nc1cc2/C(=C(/Nc3ccc(CN4CCCCC4)cc3)\c3ccccc3)/C(=O)Nc2cc1)CC	5.433	90.54	516.666	90.54	0
AurA	AurA_30362749	Fluorescent ligand-binding assay	J Am Chem Soc.	Binding Kinetics Survey of the Drugged Kinome	30362749	Kinase	NA	INK 128 (MLN0128)	Nc1oc2c(n1)cc(-c1nn(C(C)C)c3ncnc(N)c13)cc2	5.67	-3.59	2.07	literature	Nc1oc2c(n1)cc(-c1nn(C(C)C)c3ncnc(N)c13)cc2	0.97853	121.67	309.333	121.67	0
AurA	AurA_30362749	Fluorescent ligand-binding assay	J Am Chem Soc.	Binding Kinetics Survey of the Drugged Kinome	30362749	Kinase	NA	JNJ-38877605	FC(F)(c1n2N=C(c3cn(C)nc3)C=Cc2nn1)c1cc2c(nccc2)cc1	5.62	-3.34	2.28	literature	FC(F)(c1n2N=C(c3cn(C)nc3)C=Cc2nn1)c1cc2c(nccc2)cc1	3.13792	73.78	377.358	73.79	1
AurA	AurA_30362749	Fluorescent ligand-binding assay	J Am Chem Soc.	Binding Kinetics Survey of the Drugged Kinome	30362749	Kinase	NA	JNJ-7706621	S(=O)(=O)(N)c1ccc(Nc2nn(C(=O)c3c(F)cccc3F)c(N)n2)cc1	8.24	-6.33	1.91	literature	S(=O)(=O)(N)c1ccc(Nc2nn(C(=O)c3c(F)cccc3F)c(N)n2)cc1	0.89	145.99	394.362	145.99	0
AurA	AurA_30362749	Fluorescent ligand-binding assay	J Am Chem Soc.	Binding Kinetics Survey of the Drugged Kinome	30362749	Kinase	NA	KRN 633	Clc1c(NC(=O)NCCC)ccc(Oc2ncnc3c2cc(OC)c(OC)c3)c1	5.95	-3.73	2.22	literature	Clc1c(NC(=O)NCCC)ccc(Oc2ncnc3c2cc(OC)c(OC)c3)c1	3.22974	94.6	416.865	94.6	1
AurA	AurA_30362749	Fluorescent ligand-binding assay	J Am Chem Soc.	Binding Kinetics Survey of the Drugged Kinome	30362749	Kinase	NA	LDN193189	N1(c2ccc(C3=Cn4ncc(-c5c6c(ncc5)cccc6)c4N=C3)cc2)CCNCC1	6.01	-3.95	2.06	literature	N1(c2ccc(C3=Cn4ncc(-c5c6c(ncc5)cccc6)c4N=C3)cc2)CCNCC1	3.039	58.34	406.493	58.35	0
AurA	AurA_30362749	Fluorescent ligand-binding assay	J Am Chem Soc.	Binding Kinetics Survey of the Drugged Kinome	30362749	Kinase	NA	LY2784544	Clc1cc(F)c(Cc2c(C)nc3C(CN4CCOCC4)=CC(Nc4n[nH]c(C)c4)=Nn23)cc1	9.22	-6.54	2.67	literature	Clc1cc(F)c(Cc2c(C)nc3C(CN4CCOCC4)=CC(Nc4n[nH]c(C)c4)=Nn23)cc1	3.368	83.36	469.952	83.37	2
AurA	AurA_30362749	Fluorescent ligand-binding assay	J Am Chem Soc.	Binding Kinetics Survey of the Drugged Kinome	30362749	Kinase	NA	Lapatinib Ditosylate (Tykerb)	Clc1c(OCc2cc(F)ccc2)ccc(Nc2ncnc3c2cc(-c2oc(CNCCS(=O)(=O)C)cc2)cc3)c1	5.53	-3.4	2.13	literature	Clc1c(OCc2cc(F)ccc2)ccc(Nc2ncnc3c2cc(-c2oc(CNCCS(=O)(=O)C)cc2)cc3)c1	4.842	106.35	581.068	106.35	0
AurA	AurA_30362749	Fluorescent ligand-binding assay	J Am Chem Soc.	Binding Kinetics Survey of the Drugged Kinome	30362749	Kinase	NA	Linifanib (ABT-869)	Fc1c(NC(=O)Nc2ccc(-c3c4c(N)n[nH]c4ccc3)cc2)cc(C)cc1	6.59	-3.37	3.2	literature	Fc1c(NC(=O)Nc2ccc(-c3c4c(N)n[nH]c4ccc3)cc2)cc(C)cc1	4.535	95.83	375.407	95.83	3
AurA	AurA_30362749	Fluorescent ligand-binding assay	J Am Chem Soc.	Binding Kinetics Survey of the Drugged Kinome	30362749	Kinase	NA	Linsitinib (OSI-906)	OC1(C)CC(c2n3c(c(-c4cc5nc(-c6ccccc6)ccc5cc4)n2)C(N)=NC=C3)C1	5.82	-3.27	2.54	literature	OC1(C)CC(c2n3c(c(-c4cc5nc(-c6ccccc6)ccc5cc4)n2)C(N)=NC=C3)C1	3.405	89.32	421.504	89.33	0
AurA	AurA_30362749	Fluorescent ligand-binding assay	J Am Chem Soc.	Binding Kinetics Survey of the Drugged Kinome	30362749	Kinase	NA	MGCD-265	S=C(NC(=O)Cc1ccc(F)cc1)Nc1cc(F)c(Oc2c3sc(-c4ncc(CNCCOC)cc4)cc3ncc2)cc1	6.4	-4	2.41	literature	S=C(NC(=O)Cc1ccc(F)cc1)Nc1cc(F)c(Oc2c3sc(-c4ncc(CNCCOC)cc4)cc3ncc2)cc1	5.155	129.49	619.717	97.4	2
AurA	AurA_30362749	Fluorescent ligand-binding assay	J Am Chem Soc.	Binding Kinetics Survey of the Drugged Kinome	30362749	Kinase	NA	MK-2461	S(=O)(=O)(N(C[C@H]1OCCOC1)C)Nc1cc2C(=O)c3c(ncc(-c4cn(C)nc4)c3)C=Cc2cc1	7.02	-5.67	1.36	literature	S(=O)(=O)(N(C[C@H]1OCCOC1)C)Nc1cc2C(=O)c3c(ncc(-c4cn(C)nc4)c3)C=Cc2cc1	1.038	115.65	495.56	115.65	0
AurA	AurA_30362749	Fluorescent ligand-binding assay	J Am Chem Soc.	Binding Kinetics Survey of the Drugged Kinome	30362749	Kinase	NA	Milciclib (PHA-848125)	O=C(NC)c1nn(C)c-2c1C(C)(C)Cc1c-2nc(Nc2ccc(N3CCN(C)CC3)cc2)nc1	6.92	-4.98	1.94	literature	O=C(NC)c1nn(C)c-2c1C(C)(C)Cc1c-2nc(Nc2ccc(N3CCN(C)CC3)cc2)nc1	0.92053	91.21	460.586	91.21	1
AurA	AurA_30362749	Fluorescent ligand-binding assay	J Am Chem Soc.	Binding Kinetics Survey of the Drugged Kinome	30362749	Kinase	NA	NVP-ADW742	O(Cc1ccccc1)c1cc(-c2c3c(N)ncnc3n(C3CC(CN4CCCC4)C3)c2)ccc1	5.85	-3.82	2.02	literature	O(Cc1ccccc1)c1cc(-c2c3c(N)ncnc3n(C3CC(CN4CCCC4)C3)c2)ccc1	5.319	69.2	453.59	69.2	0
AurA	AurA_30362749	Fluorescent ligand-binding assay	J Am Chem Soc.	Binding Kinetics Survey of the Drugged Kinome	30362749	Kinase	NA	NVP-BSK805	Fc1c(CN2CCOCC2)c(F)cc(-c2c3nc(-c4cn(C5CCNCC5)nc4)cnc3ccc2)c1	6.05	-4	2.06	literature	Fc1c(CN2CCOCC2)c(F)cc(-c2c3nc(-c4cn(C5CCNCC5)nc4)cnc3ccc2)c1	3.38953	68.1	490.558	68.1	0
AurA	AurA_30362749	Fluorescent ligand-binding assay	J Am Chem Soc.	Binding Kinetics Survey of the Drugged Kinome	30362749	Kinase	NA	NVP-TAE226	Clc1c(Nc2c(C(=O)NC)cccc2)nc(Nc2c(OC)cc(N3CCOCC3)cc2)nc1	8.13	-6.12	2.01	literature	Clc1c(Nc2c(C(=O)NC)cccc2)nc(Nc2c(OC)cc(N3CCOCC3)cc2)nc1	2.424	100.64	468.945	100.64	0
AurA	AurA_30362749	Fluorescent ligand-binding assay	J Am Chem Soc.	Binding Kinetics Survey of the Drugged Kinome	30362749	Kinase	NA	OSI-027	O=C(O)C1CCC(c2n3N=CN=C(N)c3c(-c3[nH]c4c(OC)cccc4c3)n2)CC1	6.11	-3.72	2.39	literature	O=C(O)C1CCC(c2n3N=CN=C(N)c3c(-c3[nH]c4c(OC)cccc4c3)n2)CC1	2.35053	130.88	406.446	131.42	2
AurA	AurA_30362749	Fluorescent ligand-binding assay	J Am Chem Soc.	Binding Kinetics Survey of the Drugged Kinome	30362749	Kinase	NA	PCI-32765 (Ibrutinib)	O=C(C=C)N1C[C@H](n2nc(-c3ccc(Oc4ccccc4)cc3)c3c(N)ncnc23)CCC1	6.54	-4.36	2.19	literature	O=C(C=C)N1C[C@H](n2nc(-c3ccc(Oc4ccccc4)cc3)c3c(N)ncnc23)CCC1	3.24753	99.16	440.507	99.16	0
AurA	AurA_30362749	Fluorescent ligand-binding assay	J Am Chem Soc.	Binding Kinetics Survey of the Drugged Kinome	30362749	Kinase	NA	PD153035 HCl	Brc1cc(Nc2ncnc3c2cc(OC)c(OC)c3)ccc1	6.03	-4.06	1.97	literature	Brc1cc(Nc2ncnc3c2cc(OC)c(OC)c3)ccc1	3.31974	56.27	360.211	56.27	0
AurA	AurA_30362749	Fluorescent ligand-binding assay	J Am Chem Soc.	Binding Kinetics Survey of the Drugged Kinome	30362749	Kinase	NA	PF-00562271	S(=O)(=O)(N(C)c1c(CNc2c(C(F)(F)F)cnc(Nc3cc4c(NC(=O)C4)cc3)n2)cccn1)C	7.82	-5.71	2.11	literature	S(=O)(=O)(N(C)c1c(CNc2c(C(F)(F)F)cnc(Nc3cc4c(NC(=O)C4)cc3)n2)cccn1)C	1.07576	129.21	507.497	129.21	0
AurA	AurA_30362749	Fluorescent ligand-binding assay	J Am Chem Soc.	Binding Kinetics Survey of the Drugged Kinome	30362749	Kinase	NA	PF-03814735	FC(F)(F)c1c(NC2CCC2)nc(Nc2cc3[C@@H]4N(C(=O)CNC(=O)C)[C@H](c3cc2)CC4)nc1	9.63	-6.69	2.94	literature	FC(F)(F)c1c(NC2CCC2)nc(Nc2cc3[C@@H]4N(C(=O)CNC(=O)C)[C@H](c3cc2)CC4)nc1	2.73576	99.25	474.487	99.25	0
AurA	AurA_30362749	Fluorescent ligand-binding assay	J Am Chem Soc.	Binding Kinetics Survey of the Drugged Kinome	30362749	Kinase	NA	PHA-665752	Clc1c(CS(=O)(=O)c2cc3/C(=C/c4c(C)c(C(=O)N5[C@@H](CN6CCCC6)CCC5)c(C)[nH]4)/C(=O)Nc3cc2)c(Cl)ccc1	6.84	-5	1.84	literature	Clc1c(CS(=O)(=O)c2cc3/C(=C/c4c(C)c(C(=O)N5[C@@H](CN6CCCC6)CCC5)c(C)[nH]4)/C(=O)Nc3cc2)c(Cl)ccc1	5.282	102.58	641.62	102.58	0
AurA	AurA_30362749	Fluorescent ligand-binding assay	J Am Chem Soc.	Binding Kinetics Survey of the Drugged Kinome	30362749	Kinase	NA	PIK-294	O=C1N(c2c(C)cccc2)C(Cn2nc(-c3cc(O)ccc3)c3c(N)ncnc23)=Nc2c1c(C)ccc2	6.01	-3.6	2.39	literature	O=C1N(c2c(C)cccc2)C(Cn2nc(-c3cc(O)ccc3)c3c(N)ncnc23)=Nc2c1c(C)ccc2	3.67153	122.52	489.539	124.74	0
AurA	AurA_30362749	Fluorescent ligand-binding assay	J Am Chem Soc.	Binding Kinetics Survey of the Drugged Kinome	30362749	Kinase	NA	PIK-75	BrC1=Cn2c(/C=N/N(S(=O)(=O)c3c(C)ccc([N+](=O)[O-])c3)C)cnc2C=C1	7.02	-5.06	1.98	literature	BrC1=Cn2c(/C=N/N(S(=O)(=O)c3c(C)ccc([N+](=O)[O-])c3)C)cnc2C=C1	3.093	113.38	452.289	110.18	0
AurA	AurA_30362749	Fluorescent ligand-binding assay	J Am Chem Soc.	Binding Kinetics Survey of the Drugged Kinome	30362749	Kinase	NA	PLX-4720	Clc1cnc2[nH]cc(C(=O)c3c(F)c(NS(=O)(=O)CCC)ccc3F)c2c1	6.4	-4.38	2.03	literature	Clc1cnc2[nH]cc(C(=O)c3c(F)c(NS(=O)(=O)CCC)ccc3F)c2c1	3.58	91.92	413.832	91.92	0
AurA	AurA_30362749	Fluorescent ligand-binding assay	J Am Chem Soc.	Binding Kinetics Survey of the Drugged Kinome	30362749	Kinase	NA	PP-121	Nc1ncnc2n(C3CCCC3)nc(-c3cnc4[nH]ccc4c3)c12	5.99	-3.78	2.21	literature	Nc1ncnc2n(C3CCCC3)nc(-c3cnc4[nH]ccc4c3)c12	1.75553	98.3	319.372	98.3	0
AurA	AurA_30362749	Fluorescent ligand-binding assay	J Am Chem Soc.	Binding Kinetics Survey of the Drugged Kinome	30362749	Kinase	NA	PP242	Oc1cc2c([nH]c(-c3nn(C(C)C)c4ncnc(N)c34)c2)cc1	6.21	-3.78	2.43	literature	Oc1cc2c([nH]c(-c3nn(C(C)C)c4ncnc(N)c34)c2)cc1	1.92806	105.64	308.345	105.64	0
AurA	AurA_30362749	Fluorescent ligand-binding assay	J Am Chem Soc.	Binding Kinetics Survey of the Drugged Kinome	30362749	Kinase	NA	Pazopanib HCl	S(=O)(=O)(N)c1c(C)ccc(Nc2nc(N(C)c3cc4nn(C)c(C)c4cc3)ccn2)c1	7.26	-5.43	1.85	literature	S(=O)(=O)(N)c1c(C)ccc(Nc2nc(N(C)c3cc4nn(C)c(C)c4cc3)ccn2)c1	1.865	119.03	437.528	119.03	4
AurA	AurA_30362749	Fluorescent ligand-binding assay	J Am Chem Soc.	Binding Kinetics Survey of the Drugged Kinome	30362749	Kinase	NA	Ponatinib (AP24534)	FC(F)(F)c1c(CN2CCN(C)CC2)ccc(NC(=O)c2cc(C#Cc3n4N=CC=Cc4nc3)c(C)cc2)c1	5.99	-3.8	2.19	literature	FC(F)(F)c1c(CN2CCN(C)CC2)ccc(NC(=O)c2cc(C#Cc3n4N=CC=Cc4nc3)c(C)cc2)c1	4.88476	65.76	532.57	65.77	4
AurA	AurA_30362749	Fluorescent ligand-binding assay	J Am Chem Soc.	Binding Kinetics Survey of the Drugged Kinome	30362749	Kinase	NA	Quercetin (Sophoretin)	O=C1C(O)=C(c2cc(O)c(O)cc2)Oc2c1c(O)cc(O)c2	5.69	-3.49	2.2	literature	O=C1C(O)=C(c2cc(O)c(O)cc2)Oc2c1c(O)cc(O)c2	2.032	127.45	302.238	131.36	0
AurA	AurA_30362749	Fluorescent ligand-binding assay	J Am Chem Soc.	Binding Kinetics Survey of the Drugged Kinome	30362749	Kinase	NA	R406	Fc1c(Nc2nc3NC(=O)C(C)(C)Oc3cc2)nc(Nc2cc(OC)c(OC)c(OC)c2)nc1	7.96	-5.86	2.11	literature	Fc1c(Nc2nc3NC(=O)C(C)(C)Oc3cc2)nc(Nc2cc(OC)c(OC)c(OC)c2)nc1	1.87148	128.75	470.461	128.75	2
AurA	AurA_30362749	Fluorescent ligand-binding assay	J Am Chem Soc.	Binding Kinetics Survey of the Drugged Kinome	30362749	Kinase	NA	R788 (Fostamatinib) - prodrug	P(=O)(OCN1C(=O)C(C)(C)Oc2c1nc(Nc1c(F)cnc(Nc3cc(OC)c(OC)c(OC)c3)n1)cc2)(O)O	7.7	-5.68	2.01	literature	P(=O)(OCN1C(=O)C(C)(C)Oc2c1nc(Nc1c(F)cnc(Nc3cc(OC)c(OC)c(OC)c3)n1)cc2)(O)O	0.59748	186.72	580.466	186.72	4
AurA	AurA_30362749	Fluorescent ligand-binding assay	J Am Chem Soc.	Binding Kinetics Survey of the Drugged Kinome	30362749	Kinase	NA	Ruxolitinib (INCB018424)	N#CC[C@@H](n1ncc(-c2ncnc3[nH]ccc23)c1)C1CCCC1	6.34	-4.27	2.08	literature	N#CC[C@@H](n1ncc(-c2ncnc3[nH]ccc23)c1)C1CCCC1	1.24	83.18	306.373	83.18	4
AurA	AurA_30362749	Fluorescent ligand-binding assay	J Am Chem Soc.	Binding Kinetics Survey of the Drugged Kinome	30362749	Kinase	NA	SAR131675	O=C(NC)C1=C(N)N(CC)c2nc(C#C[C@@](O)(COC)C)ccc2C1=O	5.96	-2.91	3.06	literature	O=C(NC)C1=C(N)N(CC)c2nc(C#C[C@@](O)(COC)C)ccc2C1=O	0.845	117.78	358.398	119.47	0
AurA	AurA_30362749	Fluorescent ligand-binding assay	J Am Chem Soc.	Binding Kinetics Survey of the Drugged Kinome	30362749	Kinase	NA	SNS-032 (BMS-387032)	S(Cc1oc(C(C)(C)C)cn1)c1sc(NC(=O)C2CCNCC2)nc1	5.89	-3.91	1.98	literature	S(Cc1oc(C(C)(C)C)cn1)c1sc(NC(=O)C2CCNCC2)nc1	1.939	80.05	380.537	80.05	1
AurA	AurA_30362749	Fluorescent ligand-binding assay	J Am Chem Soc.	Binding Kinetics Survey of the Drugged Kinome	30362749	Kinase	NA	SNS-314	Clc1cc(NC(=O)Nc2sc(CCNc3ncnc4c3scc4)cn2)ccc1	9.25	-6.92	2.32	literature	Clc1cc(NC(=O)Nc2sc(CCNc3ncnc4c3scc4)cn2)ccc1	2.83	91.83	430.944	91.83
AurA	AurA_30362749	Fluorescent ligand-binding assay	J Am Chem Soc.	Binding Kinetics Survey of the Drugged Kinome	30362749	Kinase	NA	SP600125	O=C1c2c3c([nH]nc3-c3c1cccc3)ccc2	7.05	-5.02	2.03	literature	O=C1c2c3c([nH]nc3-c3c1cccc3)ccc2	3.233	45.75	220.231	45.75	0
AurA	AurA_30362749	Fluorescent ligand-binding assay	J Am Chem Soc.	Binding Kinetics Survey of the Drugged Kinome	30362749	Kinase	NA	SU11274	Clc1cc(N(S(=O)(=O)c2cc3/C(=C/c4c(C)c(C(=O)N5CCN(C)CC5)c(C)[nH]4)/C(=O)Nc3cc2)C)ccc1	7.89	-5.97	1.92	literature	Clc1cc(N(S(=O)(=O)c2cc3/C(=C/c4c(C)c(C(=O)N5CCN(C)CC5)c(C)[nH]4)/C(=O)Nc3cc2)C)ccc1	2.608	105.82	568.098	105.82	0
AurA	AurA_30362749	Fluorescent ligand-binding assay	J Am Chem Soc.	Binding Kinetics Survey of the Drugged Kinome	30362749	Kinase	NA	Semaxanib (SU5416)	O=C1/C(=C\c2c(C)cc(C)[nH]2)/c2c(N1)cccc2	6.35	-4.43	1.9	literature	O=C1/C(=C\c2c(C)cc(C)[nH]2)/c2c(N1)cccc2	2.562	44.89	238.29	44.89	3
AurA	AurA_30362749	Fluorescent ligand-binding assay	J Am Chem Soc.	Binding Kinetics Survey of the Drugged Kinome	30362749	Kinase	NA	Sunitinib Malate (Sutent)	Fc1cc2/C(=C/c3c(C)c(C(=O)NCCN(CC)CC)c(C)[nH]3)/C(=O)Nc2cc1.O=C(O)[C@@H](O)CC(=O)O	6.67	-4.95	1.72	literature	Fc1cc2/C(=C/c3c(C)c(C(=O)NCCN(CC)CC)c(C)[nH]3)/C(=O)Nc2cc1	2.569	77.23	398.482	77.23	0
AurA	AurA_30362749	Fluorescent ligand-binding assay	J Am Chem Soc.	Binding Kinetics Survey of the Drugged Kinome	30362749	Kinase	NA	TAE684 (NVP-TAE684)	Clc1c(Nc2c(S(=O)(=O)C(C)C)cccc2)nc(Nc2c(OC)cc(N3CCC(N4CCN(C)CC4)CC3)cc2)nc1	9.12	-6.66	2.46	literature	Clc1c(Nc2c(S(=O)(=O)C(C)C)cccc2)nc(Nc2c(OC)cc(N3CCC(N4CCN(C)CC4)CC3)cc2)nc1	3.959	102.93	614.215	102.93	0
AurA	AurA_30362749	Fluorescent ligand-binding assay	J Am Chem Soc.	Binding Kinetics Survey of the Drugged Kinome	30362749	Kinase	NA	TG101209	S(=O)(=O)(NC(C)(C)C)c1cc(Nc2c(C)cnc(Nc3ccc(N4CCN(C)CC4)cc3)n2)ccc1	7.55	-5.26	2.3	literature	S(=O)(=O)(NC(C)(C)C)c1cc(Nc2c(C)cnc(Nc3ccc(N4CCN(C)CC4)cc3)n2)ccc1	3.143	102.49	509.679	102.49	0
AurA	AurA_30362749	Fluorescent ligand-binding assay	J Am Chem Soc.	Binding Kinetics Survey of the Drugged Kinome	30362749	Kinase	NA	TG101348 (SAR302503)	S(=O)(=O)(NC(C)(C)C)c1cc(Nc2c(C)cnc(Nc3ccc(OCCN4CCCC4)cc3)n2)ccc1	6.9	-4.76	2.14	literature	S(=O)(=O)(NC(C)(C)C)c1cc(Nc2c(C)cnc(Nc3ccc(OCCN4CCCC4)cc3)n2)ccc1	4.068	108.48	524.69	108.48	3
AurA	AurA_30362749	Fluorescent ligand-binding assay	J Am Chem Soc.	Binding Kinetics Survey of the Drugged Kinome	30362749	Kinase	NA	TPCA-1	Fc1ccc(-c2sc(NC(=O)N)c(C(=O)N)c2)cc1	6.78	-4.66	2.12	literature	Fc1ccc(-c2sc(NC(=O)N)c(C(=O)N)c2)cc1	1.318	98.21	279.295	98.21	0
AurA	AurA_30362749	Fluorescent ligand-binding assay	J Am Chem Soc.	Binding Kinetics Survey of the Drugged Kinome	30362749	Kinase	NA	TSU-68 (SU6668)	O=C(O)CCc1c(C)c(/C=C/2\C(=O)Nc3c\2cccc3)[nH]c1C	7.77	-5.74	2.04	literature	O=C(O)CCc1c(C)c(/C=C/2\C(=O)Nc3c\2cccc3)[nH]c1C	2.374	82.19	310.353	82.19	0
AurA	AurA_30362749	Fluorescent ligand-binding assay	J Am Chem Soc.	Binding Kinetics Survey of the Drugged Kinome	30362749	Kinase	NA	TWS119	O(c1ncnc2[nH]c(-c3cc(N)ccc3)cc12)c1cc(O)ccc1	7.01	-5.02	1.99	literature	O(c1ncnc2[nH]c(-c3cc(N)ccc3)cc12)c1cc(O)ccc1	3.011	97.05	318.336	97.05	0
AurA	AurA_30362749	Fluorescent ligand-binding assay	J Am Chem Soc.	Binding Kinetics Survey of the Drugged Kinome	30362749	Kinase	NA	Tandutinib (MLN518)	O=C(Nc1ccc(OC(C)C)cc1)N1CCN(c2ncnc3c2cc(OC)c(OCCCN2CCCCC2)c3)CC1	5.44	-3.7	1.74	literature	O=C(Nc1ccc(OC(C)C)cc1)N1CCN(c2ncnc3c2cc(OC)c(OCCCN2CCCCC2)c3)CC1	3.46574	92.29	562.715	92.29	2
AurA	AurA_30362749	Fluorescent ligand-binding assay	J Am Chem Soc.	Binding Kinetics Survey of the Drugged Kinome	30362749	Kinase	NA	Thiazovivin	O=C(NCc1ccccc1)c1nc(Nc2ncncc2)sc1	5.84	-3.8	2.04	literature	O=C(NCc1ccccc1)c1nc(Nc2ncncc2)sc1	1.345	79.8	311.369	79.8	0
AurA	AurA_30362749	Fluorescent ligand-binding assay	J Am Chem Soc.	Binding Kinetics Survey of the Drugged Kinome	30362749	Kinase	NA	Tivozanib (AV-951)	Clc1c(NC(=O)Nc2noc(C)c2)ccc(Oc2c3c(ncc2)cc(OC)c(OC)c3)c1	7.45	-5.4	2.05	literature	Clc1c(NC(=O)Nc2noc(C)c2)ccc(Oc2c3c(ncc2)cc(OC)c(OC)c3)c1	3.61574	107.74	454.87	107.74	3
AurA	AurA_30362749	Fluorescent ligand-binding assay	J Am Chem Soc.	Binding Kinetics Survey of the Drugged Kinome	30362749	Kinase	NA	Tofacitinib (CP-690550 - Tasocitinib)	O=C(CC#N)N1C[C@H](N(C)c2ncnc3[nH]ccc23)[C@H](C)CC1	5.78	-3.67	2.12	literature	O=C(CC#N)N1C[C@H](N(C)c2ncnc3[nH]ccc23)[C@H](C)CC1	0.175	88.91	312.377	88.91	0
AurA	AurA_30362749	Fluorescent ligand-binding assay	J Am Chem Soc.	Binding Kinetics Survey of the Drugged Kinome	30362749	Kinase	NA	Torin 2	FC(F)(F)c1cc(N2C(=O)C=Cc3c2c2c(nc3)ccc(-c3cnc(N)cc3)c2)ccc1	6.03	-4.06	1.96	literature	FC(F)(F)c1cc(N2C(=O)C=Cc3c2c2c(nc3)ccc(-c3cnc(N)cc3)c2)ccc1	5.05176	72.11	432.405	73.8	0
AurA	AurA_30362749	Fluorescent ligand-binding assay	J Am Chem Soc.	Binding Kinetics Survey of the Drugged Kinome	30362749	Kinase	NA	Vandetanib (Zactima)	Brc1cc(F)c(Nc2ncnc3c2cc(OC)c(OCC2CCN(C)CC2)c3)cc1	5.79	-3.56	2.22	literature	Brc1cc(F)c(Nc2ncnc3c2cc(OC)c(OCC2CCN(C)CC2)c3)cc1	4.16674	59.51	475.362	59.51	4
AurA	AurA_30362749	Fluorescent ligand-binding assay	J Am Chem Soc.	Binding Kinetics Survey of the Drugged Kinome	30362749	Kinase	NA	WHI-P154	Brc1c(O)ccc(Nc2ncnc3c2cc(OC)c(OC)c3)c1	6	-4.22	1.8	literature	Brc1c(O)ccc(Nc2ncnc3c2cc(OC)c(OC)c3)c1	3.00974	76.5	376.21	76.5	0
AurA	AurA_30362749	Fluorescent ligand-binding assay	J Am Chem Soc.	Binding Kinetics Survey of the Drugged Kinome	30362749	Kinase	NA	WZ3146	Clc1c(Oc2cc(NC(=O)C=C)ccc2)nc(Nc2ccc(N3CCN(C)CC3)cc2)nc1	8.37	-6.34	2.03	literature	Clc1c(Oc2cc(NC(=O)C=C)ccc2)nc(Nc2ccc(N3CCN(C)CC3)cc2)nc1	3.187	82.62	464.957	82.62	0
AurA	AurA_30362749	Fluorescent ligand-binding assay	J Am Chem Soc.	Binding Kinetics Survey of the Drugged Kinome	30362749	Kinase	NA	WZ4002	Clc1c(Oc2cc(NC(=O)C=C)ccc2)nc(Nc2c(OC)cc(N3CCN(C)CC3)cc2)nc1	7.14	-5.19	1.95	literature	Clc1c(Oc2cc(NC(=O)C=C)ccc2)nc(Nc2c(OC)cc(N3CCN(C)CC3)cc2)nc1	3.178	91.85	494.983	91.85	0
AurA	AurA_30362749	Fluorescent ligand-binding assay	J Am Chem Soc.	Binding Kinetics Survey of the Drugged Kinome	30362749	Kinase	NA	WZ8040	Clc1c(Sc2cc(NC(=O)C=C)ccc2)nc(Nc2ccc(N3CCN(C)CC3)cc2)nc1	8.05	-5.87	2.19	literature	Clc1c(Sc2cc(NC(=O)C=C)ccc2)nc(Nc2ccc(N3CCN(C)CC3)cc2)nc1	3.823	73.39	481.024	73.39	0
AurA	AurA_30362749	Fluorescent ligand-binding assay	J Am Chem Soc.	Binding Kinetics Survey of the Drugged Kinome	30362749	Kinase	NA	XL-184 (Cabozantinib)	Fc1ccc(NC(=O)C2(C(=O)Nc3ccc(Oc4c5c(ncc4)cc(OC)c(OC)c5)cc3)CC2)cc1	6.87	-4.76	2.11	literature	Fc1ccc(NC(=O)C2(C(=O)Nc3ccc(Oc4c5c(ncc4)cc(OC)c(OC)c5)cc3)CC2)cc1	4.52074	98.78	501.514	98.78	4
AurA	AurA_30362749	Fluorescent ligand-binding assay	J Am Chem Soc.	Binding Kinetics Survey of the Drugged Kinome	30362749	Kinase	NA	ZM-447439	O=C(Nc1ccc(Nc2ncnc3c2cc(OC)c(OCCCN2CCOCC2)c3)cc1)c1ccccc1	7.6	-5.6	2	literature	O=C(Nc1ccc(Nc2ncnc3c2cc(OC)c(OCCCN2CCOCC2)c3)cc1)c1ccccc1	3.32274	97.84	513.598	97.84	0
AXL	AXL_30362749	Fluorescent ligand-binding assay	J Am Chem Soc.	Binding Kinetics Survey of the Drugged Kinome	30362749	Kinase	NA	A-674563	O(C[C@@H](N)Cc1ccccc1)c1cc(-c2cc3c(C)n[nH]c3cc2)cnc1	5.5	-5.31	0.21	literature	O(C[C@@H](N)Cc1ccccc1)c1cc(-c2cc3c(C)n[nH]c3cc2)cnc1	3.865	76.82	358.445	76.82	0
AXL	AXL_30362749	Fluorescent ligand-binding assay	J Am Chem Soc.	Binding Kinetics Survey of the Drugged Kinome	30362749	Kinase	NA	AEE788 (NVP-AEE788)	N([C@H](C)c1ccccc1)c1ncnc2[nH]c(-c3ccc(CN4CCN(CC)CC4)cc3)cc12	5.91	-5.56	0.36	literature	N([C@H](C)c1ccccc1)c1ncnc2[nH]c(-c3ccc(CN4CCN(CC)CC4)cc3)cc12	4.119	60.08	440.595	60.08	0
AXL	AXL_30362749	Fluorescent ligand-binding assay	J Am Chem Soc.	Binding Kinetics Survey of the Drugged Kinome	30362749	Kinase	NA	AG-1478 (Tyrphostin AG-1478)	Clc1cc(Nc2ncnc3c2cc(OC)c(OC)c3)ccc1	5.74	-5.5	0.3	literature	Clc1cc(Nc2ncnc3c2cc(OC)c(OC)c3)ccc1	3.11374	56.27	315.76	56.27	0
AXL	AXL_30362749	Fluorescent ligand-binding assay	J Am Chem Soc.	Binding Kinetics Survey of the Drugged Kinome	30362749	Kinase	NA	AT9283	O=C(Nc1c(-c2[nH]c3c(n2)cc(CN2CCOCC2)cc3)n[nH]c1)NC1CC1	7.51	-7.08	0.43	literature	O=C(Nc1c(-c2[nH]c3c(n2)cc(CN2CCOCC2)cc3)n[nH]c1)NC1CC1	1.13706	110.96	381.44	110.96
AXL	AXL_30362749	Fluorescent ligand-binding assay	J Am Chem Soc.	Binding Kinetics Survey of the Drugged Kinome	30362749	Kinase	NA	AZD4547	O=C(Nc1n[nH]c(CCc2cc(OC)cc(OC)c2)c1)c1ccc(N2C[C@@H](C)N[C@@H](C)C2)cc1	6.21	-6.4	-0.07	literature	O=C(Nc1n[nH]c(CCc2cc(OC)cc(OC)c2)c1)c1ccc(N2C[C@@H](C)N[C@@H](C)C2)cc1	3.948	91.51	463.582	91.51	2
AXL	AXL_30362749	Fluorescent ligand-binding assay	J Am Chem Soc.	Binding Kinetics Survey of the Drugged Kinome	30362749	Kinase	NA	AZD7762	Fc1cc(-c2sc(C(=O)N[C@@H]3CNCCC3)c(NC(=O)N)c2)ccc1	7.36	-6.89	0.52	literature	Fc1cc(-c2sc(C(=O)N[C@@H]3CNCCC3)c(NC(=O)N)c2)ccc1	1.64	96.25	362.429	96.25	0
AXL	AXL_30362749	Fluorescent ligand-binding assay	J Am Chem Soc.	Binding Kinetics Survey of the Drugged Kinome	30362749	Kinase	NA	Aurora A Inhibitor I	Clc1c(NC(=O)c2ccc(Nc3c(F)cnc(Nc4ccc(CC(=O)N5CCN(CC)CC5)cc4)n3)cc2)cccc1	5.91	-5.92	-0.01	literature	Clc1c(NC(=O)c2ccc(Nc3c(F)cnc(Nc4ccc(CC(=O)N5CCN(CC)CC5)cc4)n3)cc2)cccc1	4.209	102.49	588.087	102.49	0
AXL	AXL_30362749	Fluorescent ligand-binding assay	J Am Chem Soc.	Binding Kinetics Survey of the Drugged Kinome	30362749	Kinase	NA	BEZ235 (NVP-BEZ235)	O=C1N(C)c2c(N1c1ccc(C(C#N)(C)C)cc1)c1c(nc2)ccc(-c2cnc3c(c2)cccc3)c1	5.79	-5.39	0.55	literature	O=C1N(C)c2c(N1c1ccc(C(C#N)(C)C)cc1)c1c(nc2)ccc(-c2cnc3c(c2)cccc3)c1	6.131	73.12	469.548	76.5	0
AXL	AXL_30362749	Fluorescent ligand-binding assay	J Am Chem Soc.	Binding Kinetics Survey of the Drugged Kinome	30362749	Kinase	NA	BIBF1120 (Vargatef)	O=C(N(C)c1ccc(N/C(/c2ccccc2)=C/2\C(=O)Nc3c\2ccc(C(=O)OC)c3)cc1)CN1CCN(C)CC1	7.13	-6.87	0.27	literature	O=C(N(C)c1ccc(N/C(/c2ccccc2)=C/2\C(=O)Nc3c\2ccc(C(=O)OC)c3)cc1)CN1CCN(C)CC1	3.507	94.22	539.636	94.22	0
AXL	AXL_30362749	Fluorescent ligand-binding assay	J Am Chem Soc.	Binding Kinetics Survey of the Drugged Kinome	30362749	Kinase	NA	BIX 02188	O=C(N)c1cc2NC(=O)/C(=C(\Nc3cc(CN(C)C)ccc3)/c3ccccc3)/c2cc1	6.38	-6.04	0.32	literature	O=C(N)c1cc2NC(=O)/C(=C(\Nc3cc(CN(C)C)ccc3)/c3ccccc3)/c2cc1	3.831	87.46	412.493	87.46	0
AXL	AXL_30362749	Fluorescent ligand-binding assay	J Am Chem Soc.	Binding Kinetics Survey of the Drugged Kinome	30362749	Kinase	NA	BMS 777607	Clc1c(N)nccc1Oc1c(F)cc(NC(=O)C=2C(=O)N(c3ccc(F)cc3)C=CC=2OCC)cc1	10.02	-6.88	3.14	literature	Clc1c(N)nccc1Oc1c(F)cc(NC(=O)C=2C(=O)N(c3ccc(F)cc3)C=CC=2OCC)cc1	3.964	106.78	512.9	108.47	2
AXL	AXL_30362749	Fluorescent ligand-binding assay	J Am Chem Soc.	Binding Kinetics Survey of the Drugged Kinome	30362749	Kinase	NA	BMS 794833	Clc1c(N)nccc1Oc1c(F)cc(NC(=O)C=2C(=O)C(c3ccc(F)cc3)=CNC=2)cc1	8.93	-6.26	2.67	literature	Clc1c(N)nccc1Oc1c(F)cc(NC(=O)C=2C(=O)C(c3ccc(F)cc3)=CNC=2)cc1	3.076	106.34	468.847	110.1	0
AXL	AXL_30362749	Fluorescent ligand-binding assay	J Am Chem Soc.	Binding Kinetics Survey of the Drugged Kinome	30362749	Kinase	NA	Barasertib (AZD1152-HQPA)	P(=O)(OCCN(CCCOc1cc2ncnc(Nc3[nH]nc(CC(=O)Nc4cc(F)ccc4)c3)c2cc1)CC)(O)O	7.13	-6.65	0.48	literature	P(=O)(OCCN(CCCOc1cc2ncnc(Nc3[nH]nc(CC(=O)Nc4cc(F)ccc4)c3)c2cc1)CC)(O)O	1.886	174.82	587.549	174.82
AXL	AXL_30362749	Fluorescent ligand-binding assay	J Am Chem Soc.	Binding Kinetics Survey of the Drugged Kinome	30362749	Kinase	NA	Bosutinib (SKI-606)	Clc1c(OC)cc(Nc2c(C#N)cnc3c2cc(OC)c(OCCCN2CCN(C)CC2)c3)c(Cl)c1	7.88	-7.63	0.29	literature	Clc1c(OC)cc(Nc2c(C#N)cnc3c2cc(OC)c(OCCCN2CCN(C)CC2)c3)c(Cl)c1	3.93474	82.88	530.456	82.88	4
AXL	AXL_30362749	Fluorescent ligand-binding assay	J Am Chem Soc.	Binding Kinetics Survey of the Drugged Kinome	30362749	Kinase	NA	CCT128930	O=C(Nc1sc(c(C)n1)-c1nc(C(C)(C)C)sc1)N1[C@H](C(=O)N)CCC1	5.76	-5.7	0.02	literature	O=C(Nc1sc(c(C)n1)-c1nc(C(C)(C)C)sc1)N1[C@H](C(=O)N)CCC1	1.646	101.21	393.536	101.21	0
AXL	AXL_30362749	Fluorescent ligand-binding assay	J Am Chem Soc.	Binding Kinetics Survey of the Drugged Kinome	30362749	Kinase	NA	CCT129202	Clc1c(N2CCN(CC(=O)Nc3sccn3)CC2)c2[nH]c(-c3ccc(N(C)C)cc3)nc2nc1	5.99	-5.72	0.25	literature	Clc1c(N2CCN(CC(=O)Nc3sccn3)CC2)c2[nH]c(-c3ccc(N(C)C)cc3)nc2nc1	1.99653	93.28	497.027	93.28
AXL	AXL_30362749	Fluorescent ligand-binding assay	J Am Chem Soc.	Binding Kinetics Survey of the Drugged Kinome	30362749	Kinase	NA	CEP33779	S(=O)(=O)(C)c1ccc(C=2c3n(nc(Nc4cc(N5CCN(C)CC5)ccc4)n3)C=CC=2)cc1	6.75	-6.18	0.68	literature	S(=O)(=O)(C)c1ccc(C=2c3n(nc(Nc4cc(N5CCN(C)CC5)ccc4)n3)C=CC=2)cc1	1.624	83.36	462.578	82.84	0
AXL	AXL_30362749	Fluorescent ligand-binding assay	J Am Chem Soc.	Binding Kinetics Survey of the Drugged Kinome	30362749	Kinase	NA	CH5424802	O=C1c2c3c([nH]c2C(C)(C)c2c1cc(CC)c(N1CCC(N4CCOCC4)CC1)c2)cc(C#N)cc3	7.07	-6.87	0.29	literature	O=C1c2c3c([nH]c2C(C)(C)c2c1cc(CC)c(N1CCC(N4CCOCC4)CC1)c2)cc(C#N)cc3	5.589	72.36	482.628	72.36	4
AXL	AXL_30362749	Fluorescent ligand-binding assay	J Am Chem Soc.	Binding Kinetics Survey of the Drugged Kinome	30362749	Kinase	NA	CHIR-124	Clc1cc2C(N[C@H]3C4CCN(C3)CC4)=C(c3[nH]c4c(n3)cccc4)C(=O)Nc2cc1	6.24	-6.03	0.48	literature	Clc1cc2C(N[C@H]3C4CCN(C3)CC4)=C(c3[nH]c4c(n3)cccc4)C(=O)Nc2cc1	3.375	73.05	419.916	76.81	0
AXL	AXL_30362749	Fluorescent ligand-binding assay	J Am Chem Soc.	Binding Kinetics Survey of the Drugged Kinome	30362749	Kinase	NA	CI-1033 (Canertinib)	Clc1c(F)ccc(Nc2ncnc3c2cc(NC(=O)C=C)c(OCCCN2CCOCC2)c3)c1	6.57	-6.39	-0.02	literature	Clc1c(F)ccc(Nc2ncnc3c2cc(NC(=O)C=C)c(OCCCN2CCOCC2)c3)c1	3.269	88.61	485.947	88.61	3
AXL	AXL_30362749	Fluorescent ligand-binding assay	J Am Chem Soc.	Binding Kinetics Survey of the Drugged Kinome	30362749	Kinase	NA	CX-4945 (Silmitasertib)	Clc1cc(Nc2nc3c(c4c2ccnc4)ccc(C(=O)O)c3)ccc1	7.16	-7.11	0.11	literature	Clc1cc(Nc2nc3c(c4c2ccnc4)ccc(C(=O)O)c3)ccc1	4.223	75.11	349.777	75.11	2
AXL	AXL_30362749	Fluorescent ligand-binding assay	J Am Chem Soc.	Binding Kinetics Survey of the Drugged Kinome	30362749	Kinase	NA	CYC116	N(c1nc(-c2c(C)nc(N)s2)ccn1)c1ccc(N2CCOCC2)cc1	6.81	-6.66	0.14	literature	N(c1nc(-c2c(C)nc(N)s2)ccn1)c1ccc(N2CCOCC2)cc1	1.126	89.19	368.465	89.19	1
AXL	AXL_30362749	Fluorescent ligand-binding assay	J Am Chem Soc.	Binding Kinetics Survey of the Drugged Kinome	30362749	Kinase	NA	Cyt387	O=C(NCC#N)c1ccc(-c2nc(Nc3ccc(N4CCOCC4)cc3)ncc2)cc1	5.95	-5.76	0.18	literature	O=C(NCC#N)c1ccc(-c2nc(Nc3ccc(N4CCOCC4)cc3)ncc2)cc1	1.468	103.17	414.469	103.17	3
AXL	AXL_30362749	Fluorescent ligand-binding assay	J Am Chem Soc.	Binding Kinetics Survey of the Drugged Kinome	30362749	Kinase	NA	Dacomitinib (PF299804 - PF-00299804)	Clc1c(F)ccc(Nc2ncnc3c2cc(NC(=O)/C=C/CN2CCCCC2)c(OC)c3)c1	6.04	-5.5	0.55	literature	Clc1c(F)ccc(Nc2ncnc3c2cc(NC(=O)/C=C/CN2CCCCC2)c(OC)c3)c1	4.217	79.38	469.948	79.38	4
AXL	AXL_30362749	Fluorescent ligand-binding assay	J Am Chem Soc.	Binding Kinetics Survey of the Drugged Kinome	30362749	Kinase	NA	Desmethyl Erlotinib (CP-473420)	O(CCOc1c(OCCO)cc2c(Nc3cc(C#C)ccc3)ncnc2c1)C	6.08	-5.91	0.22	literature	O(CCOc1c(OCCO)cc2c(Nc3cc(C#C)ccc3)ncnc2c1)C	1.97548	85.73	379.416	85.73	0
AXL	AXL_30362749	Fluorescent ligand-binding assay	J Am Chem Soc.	Binding Kinetics Survey of the Drugged Kinome	30362749	Kinase	NA	E7080 (Lenvatinib)	Clc1c(NC(=O)NC2CC2)ccc(Oc2c3c(ncc2)cc(OC)c(C(=O)N)c3)c1	5.99	-5.63	0.36	literature	Clc1c(NC(=O)NC2CC2)ccc(Oc2c3c(ncc2)cc(OC)c(C(=O)N)c3)c1	2.902	115.57	426.86	115.57	0
AXL	AXL_30362749	Fluorescent ligand-binding assay	J Am Chem Soc.	Binding Kinetics Survey of the Drugged Kinome	30362749	Kinase	NA	ENMD-2076	N(c1nc(/C=C/c2ccccc2)nc(N2CCN(C)CC2)c1)c1n[nH]c(C)c1	6.98	-6.38	0.63	literature	N(c1nc(/C=C/c2ccccc2)nc(N2CCN(C)CC2)c1)c1n[nH]c(C)c1	2.969	72.97	375.48	72.97	0
AXL	AXL_30362749	Fluorescent ligand-binding assay	J Am Chem Soc.	Binding Kinetics Survey of the Drugged Kinome	30362749	Kinase	NA	GSK1070916	O=C(N(C)C)Nc1ccc(-c2c(-c3c4c([nH]c(-c5cc(CN(C)C)ccc5)c4)ncc3)cn(CC)n2)cc1	8.04	-6.37	1.67	literature	O=C(N(C)C)Nc1ccc(-c2c(-c3c4c([nH]c(-c5cc(CN(C)C)ccc5)c4)ncc3)cn(CC)n2)cc1	4.46	82.08	507.642	82.08	1
AXL	AXL_30362749	Fluorescent ligand-binding assay	J Am Chem Soc.	Binding Kinetics Survey of the Drugged Kinome	30362749	Kinase	NA	GSK1838705A	Fc1c(C(=O)NC)c(Nc2nc(Nc3c(OC)cc4c(N(C(=O)CN(C)C)CC4)c3)nc3[nH]ccc23)ccc1	5.77	-5.14	0.62	literature	Fc1c(C(=O)NC)c(Nc2nc(Nc3c(OC)cc4c(N(C(=O)CN(C)C)CC4)c3)nc3[nH]ccc23)ccc1	2.101	127.51	532.58	127.51	0
AXL	AXL_30362749	Fluorescent ligand-binding assay	J Am Chem Soc.	Binding Kinetics Survey of the Drugged Kinome	30362749	Kinase	NA	Golvatinib (E7050)	Fc1c(NC(=O)C2(C(=O)Nc3ccc(F)cc3)CC2)ccc(Oc2cc(NC(=O)N3CCC(N4CCN(C)CC4)CC3)ncc2)c1	9.14	-7.02	2.13	literature	Fc1c(NC(=O)C2(C(=O)Nc3ccc(F)cc3)CC2)ccc(Oc2cc(NC(=O)N3CCC(N4CCN(C)CC4)CC3)ncc2)c1	3.17	119.14	633.7	119.14	0
AXL	AXL_30362749	Fluorescent ligand-binding assay	J Am Chem Soc.	Binding Kinetics Survey of the Drugged Kinome	30362749	Kinase	NA	Hesperadin	S(=O)(=O)(Nc1cc2/C(=C(/Nc3ccc(CN4CCCCC4)cc3)\c3ccccc3)/C(=O)Nc2cc1)CC	8.79	-7.83	0.96	literature	S(=O)(=O)(Nc1cc2/C(=C(/Nc3ccc(CN4CCCCC4)cc3)\c3ccccc3)/C(=O)Nc2cc1)CC	5.433	90.54	516.666	90.54	0
AXL	AXL_30362749	Fluorescent ligand-binding assay	J Am Chem Soc.	Binding Kinetics Survey of the Drugged Kinome	30362749	Kinase	NA	INCB28060	Fc1c(C(=O)NC)ccc(C2=Nn3c(Cc4cc5c(nccc5)cc4)cnc3N=C2)c1	5.97	-6.13	-0.06	literature	Fc1c(C(=O)NC)ccc(C2=Nn3c(Cc4cc5c(nccc5)cc4)cnc3N=C2)c1	3.072	84.53	412.428	85.07	0
AXL	AXL_30362749	Fluorescent ligand-binding assay	J Am Chem Soc.	Binding Kinetics Survey of the Drugged Kinome	30362749	Kinase	NA	JNJ-7706621	S(=O)(=O)(N)c1ccc(Nc2nn(C(=O)c3c(F)cccc3F)c(N)n2)cc1	6.38	-6.33	0.04	literature	S(=O)(=O)(N)c1ccc(Nc2nn(C(=O)c3c(F)cccc3F)c(N)n2)cc1	0.89	145.99	394.362	145.99	0
AXL	AXL_30362749	Fluorescent ligand-binding assay	J Am Chem Soc.	Binding Kinetics Survey of the Drugged Kinome	30362749	Kinase	NA	KRN 633	Clc1c(NC(=O)NCCC)ccc(Oc2ncnc3c2cc(OC)c(OC)c3)c1	6.08	-5.93	0.15	literature	Clc1c(NC(=O)NCCC)ccc(Oc2ncnc3c2cc(OC)c(OC)c3)c1	3.22974	94.6	416.865	94.6	1
AXL	AXL_30362749	Fluorescent ligand-binding assay	J Am Chem Soc.	Binding Kinetics Survey of the Drugged Kinome	30362749	Kinase	NA	Ki8751	Fc1c(NC(=O)Nc2c(F)cc(Oc3c4c(ncc3)cc(OC)c(OC)c4)cc2)ccc(F)c1	7.67	-6.75	0.93	literature	Fc1c(NC(=O)Nc2c(F)cc(Oc3c4c(ncc3)cc(OC)c(OC)c4)cc2)ccc(F)c1	4.56974	81.71	469.419	81.71	0
AXL	AXL_30362749	Fluorescent ligand-binding assay	J Am Chem Soc.	Binding Kinetics Survey of the Drugged Kinome	30362749	Kinase	NA	Linifanib (ABT-869)	Fc1c(NC(=O)Nc2ccc(-c3c4c(N)n[nH]c4ccc3)cc2)cc(C)cc1	7.09	-5.13	1.11	literature	Fc1c(NC(=O)Nc2ccc(-c3c4c(N)n[nH]c4ccc3)cc2)cc(C)cc1	4.535	95.83	375.407	95.83	3
AXL	AXL_30362749	Fluorescent ligand-binding assay	J Am Chem Soc.	Binding Kinetics Survey of the Drugged Kinome	30362749	Kinase	NA	MGCD-265	S=C(NC(=O)Cc1ccc(F)cc1)Nc1cc(F)c(Oc2c3sc(-c4ncc(CNCCOC)cc4)cc3ncc2)cc1	9.27	-6.25	3.03	literature	S=C(NC(=O)Cc1ccc(F)cc1)Nc1cc(F)c(Oc2c3sc(-c4ncc(CNCCOC)cc4)cc3ncc2)cc1	5.155	129.49	619.717	97.4	2
AXL	AXL_30362749	Fluorescent ligand-binding assay	J Am Chem Soc.	Binding Kinetics Survey of the Drugged Kinome	30362749	Kinase	NA	MLN8054	Clc1cc2C(c3c(F)cccc3F)=NCc3c(nc(Nc4ccc(C(=O)O)cc4)nc3)-c2cc1	6.6	-6.35	0.25	literature	Clc1cc2C(c3c(F)cccc3F)=NCc3c(nc(Nc4ccc(C(=O)O)cc4)nc3)-c2cc1	5.189	87.47	476.87	87.47	0
AXL	AXL_30362749	Fluorescent ligand-binding assay	J Am Chem Soc.	Binding Kinetics Survey of the Drugged Kinome	30362749	Kinase	NA	Milciclib (PHA-848125)	O=C(NC)c1nn(C)c-2c1C(C)(C)Cc1c-2nc(Nc2ccc(N3CCN(C)CC3)cc2)nc1	7.16	-6.66	0.5	literature	O=C(NC)c1nn(C)c-2c1C(C)(C)Cc1c-2nc(Nc2ccc(N3CCN(C)CC3)cc2)nc1	0.92053	91.21	460.586	91.21	1
AXL	AXL_30362749	Fluorescent ligand-binding assay	J Am Chem Soc.	Binding Kinetics Survey of the Drugged Kinome	30362749	Kinase	NA	NVP-BGT226	FC(F)(F)c1c(N2CCNCC2)ccc(N2C(=O)N(C)c3c2c2c(nc3)ccc(-c3cnc(OC)cc3)c2)c1.O=C(O)/C=C\C(=O)O	6.24	-5.62	0.56	literature	FC(F)(F)c1c(N2CCNCC2)ccc(N2C(=O)N(C)c3c2c2c(nc3)ccc(-c3cnc(OC)cc3)c2)c1	4.03876	73.83	534.542	77.21	2
AXL	AXL_30362749	Fluorescent ligand-binding assay	J Am Chem Soc.	Binding Kinetics Survey of the Drugged Kinome	30362749	Kinase	NA	NVP-BSK805	Fc1c(CN2CCOCC2)c(F)cc(-c2c3nc(-c4cn(C5CCNCC5)nc4)cnc3ccc2)c1	7.39	-6.69	0.78	literature	Fc1c(CN2CCOCC2)c(F)cc(-c2c3nc(-c4cn(C5CCNCC5)nc4)cnc3ccc2)c1	3.38953	68.1	490.558	68.1	0
AXL	AXL_30362749	Fluorescent ligand-binding assay	J Am Chem Soc.	Binding Kinetics Survey of the Drugged Kinome	30362749	Kinase	NA	Neratinib (HKI-272)	Clc1c(OCc2ncccc2)ccc(Nc2c(C#N)cnc3c2cc(NC(=O)/C=C/CN(C)C)c(OCC)c3)c1	6.7	-5.77	0.93	literature	Clc1c(OCc2ncccc2)ccc(Nc2c(C#N)cnc3c2cc(NC(=O)/C=C/CN(C)C)c(OCC)c3)c1	4.3	112.4	557.054	112.4	4
AXL	AXL_30362749	Fluorescent ligand-binding assay	J Am Chem Soc.	Binding Kinetics Survey of the Drugged Kinome	30362749	Kinase	NA	PF-00562271	S(=O)(=O)(N(C)c1c(CNc2c(C(F)(F)F)cnc(Nc3cc4c(NC(=O)C4)cc3)n2)cccn1)C	6.5	-6.24	0.28	literature	S(=O)(=O)(N(C)c1c(CNc2c(C(F)(F)F)cnc(Nc3cc4c(NC(=O)C4)cc3)n2)cccn1)C	1.07576	129.21	507.497	129.21	0
AXL	AXL_30362749	Fluorescent ligand-binding assay	J Am Chem Soc.	Binding Kinetics Survey of the Drugged Kinome	30362749	Kinase	NA	PHA-665752	Clc1c(CS(=O)(=O)c2cc3/C(=C/c4c(C)c(C(=O)N5[C@@H](CN6CCCC6)CCC5)c(C)[nH]4)/C(=O)Nc3cc2)c(Cl)ccc1	7.27	-7.11	0.13	literature	Clc1c(CS(=O)(=O)c2cc3/C(=C/c4c(C)c(C(=O)N5[C@@H](CN6CCCC6)CCC5)c(C)[nH]4)/C(=O)Nc3cc2)c(Cl)ccc1	5.282	102.58	641.62	102.58	0
AXL	AXL_30362749	Fluorescent ligand-binding assay	J Am Chem Soc.	Binding Kinetics Survey of the Drugged Kinome	30362749	Kinase	NA	PHA-680632	O=C(Nc1c(CC)cccc1CC)N1Cc2c(NC(=O)c3ccc(N4CCN(C)CC4)cc3)n[nH]c2C1	6.39	-6.39	-0.01	literature	O=C(Nc1c(CC)cccc1CC)N1Cc2c(NC(=O)c3ccc(N4CCN(C)CC4)cc3)n[nH]c2C1	3.374	96.6	501.635	96.6	0
AXL	AXL_30362749	Fluorescent ligand-binding assay	J Am Chem Soc.	Binding Kinetics Survey of the Drugged Kinome	30362749	Kinase	NA	PHT-427	S(=O)(=O)(Nc1scnn1)c1ccc(CCCCCCCCCCCC)cc1	5.18	-4.91	0.25	literature	S(=O)(=O)(Nc1scnn1)c1ccc(CCCCCCCCCCCC)cc1	6.764	71.95	409.619	71.95	0
AXL	AXL_30362749	Fluorescent ligand-binding assay	J Am Chem Soc.	Binding Kinetics Survey of the Drugged Kinome	30362749	Kinase	NA	PIK-75	BrC1=Cn2c(/C=N/N(S(=O)(=O)c3c(C)ccc([N+](=O)[O-])c3)C)cnc2C=C1	7.55	-7.38	0.24	literature	BrC1=Cn2c(/C=N/N(S(=O)(=O)c3c(C)ccc([N+](=O)[O-])c3)C)cnc2C=C1	3.093	113.38	452.289	110.18	0
AXL	AXL_30362749	Fluorescent ligand-binding assay	J Am Chem Soc.	Binding Kinetics Survey of the Drugged Kinome	30362749	Kinase	NA	PP-121	Nc1ncnc2n(C3CCCC3)nc(-c3cnc4[nH]ccc4c3)c12	5.79	-5.15	0.66	literature	Nc1ncnc2n(C3CCCC3)nc(-c3cnc4[nH]ccc4c3)c12	1.75553	98.3	319.372	98.3	0
AXL	AXL_30362749	Fluorescent ligand-binding assay	J Am Chem Soc.	Binding Kinetics Survey of the Drugged Kinome	30362749	Kinase	NA	PP242	Oc1cc2c([nH]c(-c3nn(C(C)C)c4ncnc(N)c34)c2)cc1	6.08	-5.69	0.48	literature	Oc1cc2c([nH]c(-c3nn(C(C)C)c4ncnc(N)c34)c2)cc1	1.92806	105.64	308.345	105.64	0
AXL	AXL_30362749	Fluorescent ligand-binding assay	J Am Chem Soc.	Binding Kinetics Survey of the Drugged Kinome	30362749	Kinase	NA	Pelitinib (EKB-569)	Clc1c(F)ccc(Nc2c(C#N)cnc3c2cc(NC(=O)/C=C/CN(C)C)c(OCC)c3)c1	6.89	-6.01	0.87	literature	Clc1c(F)ccc(Nc2c(C#N)cnc3c2cc(NC(=O)/C=C/CN(C)C)c(OCC)c3)c1	3.98	90.28	467.932	90.28	0
AXL	AXL_30362749	Fluorescent ligand-binding assay	J Am Chem Soc.	Binding Kinetics Survey of the Drugged Kinome	30362749	Kinase	NA	Ponatinib (AP24534)	FC(F)(F)c1c(CN2CCN(C)CC2)ccc(NC(=O)c2cc(C#Cc3n4N=CC=Cc4nc3)c(C)cc2)c1	6.81	-6.46	0.36	literature	FC(F)(F)c1c(CN2CCN(C)CC2)ccc(NC(=O)c2cc(C#Cc3n4N=CC=Cc4nc3)c(C)cc2)c1	4.88476	65.76	532.57	65.77	4
AXL	AXL_30362749	Fluorescent ligand-binding assay	J Am Chem Soc.	Binding Kinetics Survey of the Drugged Kinome	30362749	Kinase	NA	R406	Fc1c(Nc2nc3NC(=O)C(C)(C)Oc3cc2)nc(Nc2cc(OC)c(OC)c(OC)c2)nc1	5.75	-5.41	0.41	literature	Fc1c(Nc2nc3NC(=O)C(C)(C)Oc3cc2)nc(Nc2cc(OC)c(OC)c(OC)c2)nc1	1.87148	128.75	470.461	128.75	2
AXL	AXL_30362749	Fluorescent ligand-binding assay	J Am Chem Soc.	Binding Kinetics Survey of the Drugged Kinome	30362749	Kinase	NA	R788 (Fostamatinib) - prodrug	P(=O)(OCN1C(=O)C(C)(C)Oc2c1nc(Nc1c(F)cnc(Nc3cc(OC)c(OC)c(OC)c3)n1)cc2)(O)O	5.79	-5.2	0.46	literature	P(=O)(OCN1C(=O)C(C)(C)Oc2c1nc(Nc1c(F)cnc(Nc3cc(OC)c(OC)c(OC)c3)n1)cc2)(O)O	0.59748	186.72	580.466	186.72	4
AXL	AXL_30362749	Fluorescent ligand-binding assay	J Am Chem Soc.	Binding Kinetics Survey of the Drugged Kinome	30362749	Kinase	NA	SNS-314	Clc1cc(NC(=O)Nc2sc(CCNc3ncnc4c3scc4)cn2)ccc1	7.95	-7.51	0.45	literature	Clc1cc(NC(=O)Nc2sc(CCNc3ncnc4c3scc4)cn2)ccc1	2.83	91.83	430.944	91.83
AXL	AXL_30362749	Fluorescent ligand-binding assay	J Am Chem Soc.	Binding Kinetics Survey of the Drugged Kinome	30362749	Kinase	NA	SP600125	O=C1c2c3c([nH]nc3-c3c1cccc3)ccc2	6.16	-6.05	0.12	literature	O=C1c2c3c([nH]nc3-c3c1cccc3)ccc2	3.233	45.75	220.231	45.75	0
AXL	AXL_30362749	Fluorescent ligand-binding assay	J Am Chem Soc.	Binding Kinetics Survey of the Drugged Kinome	30362749	Kinase	NA	SU11274	Clc1cc(N(S(=O)(=O)c2cc3/C(=C/c4c(C)c(C(=O)N5CCN(C)CC5)c(C)[nH]4)/C(=O)Nc3cc2)C)ccc1	7.49	-7.01	0.49	literature	Clc1cc(N(S(=O)(=O)c2cc3/C(=C/c4c(C)c(C(=O)N5CCN(C)CC5)c(C)[nH]4)/C(=O)Nc3cc2)C)ccc1	2.608	105.82	568.098	105.82	0
AXL	AXL_30362749	Fluorescent ligand-binding assay	J Am Chem Soc.	Binding Kinetics Survey of the Drugged Kinome	30362749	Kinase	NA	Saracatinib (AZD0530)	Clc1c(Nc2ncnc3c2c(OC2CCOCC2)cc(OCCN2CCN(C)CC2)c3)c2OCOc2cc1	6.33	-6.17	0.17	literature	Clc1c(Nc2ncnc3c2c(OC2CCOCC2)cc(OCCN2CCN(C)CC2)c3)c2OCOc2cc1	2.962	90.44	542.036	90.44	3
AXL	AXL_30362749	Fluorescent ligand-binding assay	J Am Chem Soc.	Binding Kinetics Survey of the Drugged Kinome	30362749	Kinase	NA	Semaxanib (SU5416)	O=C1/C(=C\c2c(C)cc(C)[nH]2)/c2c(N1)cccc2	6.39	-5.86	0.52	literature	O=C1/C(=C\c2c(C)cc(C)[nH]2)/c2c(N1)cccc2	2.562	44.89	238.29	44.89	3
AXL	AXL_30362749	Fluorescent ligand-binding assay	J Am Chem Soc.	Binding Kinetics Survey of the Drugged Kinome	30362749	Kinase	NA	Staurosporine	O(C)[C@@H]1[C@H](NC)C[C@H]2O[C@]1(C)n1c3c4n2c2c(c4c4C(=O)NCc4c3c3c1cccc3)cccc2	8.7	-7.66	1.04	literature	O(C)[C@@H]1[C@H](NC)C[C@H]2O[C@]1(C)n1c3c4n2c2c(c4c4C(=O)NCc4c3c3c1cccc3)cccc2	6.35953	69.45	466.541	69.45	0
AXL	AXL_30362749	Fluorescent ligand-binding assay	J Am Chem Soc.	Binding Kinetics Survey of the Drugged Kinome	30362749	Kinase	NA	Sunitinib Malate (Sutent)	Fc1cc2/C(=C/c3c(C)c(C(=O)NCCN(CC)CC)c(C)[nH]3)/C(=O)Nc2cc1.O=C(O)[C@@H](O)CC(=O)O	7.96	-7.64	0.27	literature	Fc1cc2/C(=C/c3c(C)c(C(=O)NCCN(CC)CC)c(C)[nH]3)/C(=O)Nc2cc1	2.569	77.23	398.482	77.23	0
AXL	AXL_30362749	Fluorescent ligand-binding assay	J Am Chem Soc.	Binding Kinetics Survey of the Drugged Kinome	30362749	Kinase	NA	TAE684 (NVP-TAE684)	Clc1c(Nc2c(S(=O)(=O)C(C)C)cccc2)nc(Nc2c(OC)cc(N3CCC(N4CCN(C)CC4)CC3)cc2)nc1	7.92	-7.21	0.87	literature	Clc1c(Nc2c(S(=O)(=O)C(C)C)cccc2)nc(Nc2c(OC)cc(N3CCC(N4CCN(C)CC4)CC3)cc2)nc1	3.959	102.93	614.215	102.93	0
AXL	AXL_30362749	Fluorescent ligand-binding assay	J Am Chem Soc.	Binding Kinetics Survey of the Drugged Kinome	30362749	Kinase	NA	TAK-901	S(=O)(=O)(CC)c1cc(-c2c3c(c(C)c(C(=O)NC4CCN(C)CC4)c2)[nH]c2ncc(C)cc32)ccc1	7.76	-7.27	0.49	literature	S(=O)(=O)(CC)c1cc(-c2c3c(c(C)c(C(=O)NC4CCN(C)CC4)c2)[nH]c2ncc(C)cc32)ccc1	4.722	95.16	504.655	95.16	1
AXL	AXL_30362749	Fluorescent ligand-binding assay	J Am Chem Soc.	Binding Kinetics Survey of the Drugged Kinome	30362749	Kinase	NA	TG101209	S(=O)(=O)(NC(C)(C)C)c1cc(Nc2c(C)cnc(Nc3ccc(N4CCN(C)CC4)cc3)n2)ccc1	7.22	-7.18	0.05	literature	S(=O)(=O)(NC(C)(C)C)c1cc(Nc2c(C)cnc(Nc3ccc(N4CCN(C)CC4)cc3)n2)ccc1	3.143	102.49	509.679	102.49	0
AXL	AXL_30362749	Fluorescent ligand-binding assay	J Am Chem Soc.	Binding Kinetics Survey of the Drugged Kinome	30362749	Kinase	NA	TPCA-1	Fc1ccc(-c2sc(NC(=O)N)c(C(=O)N)c2)cc1	5.77	-5.74	-0.01	literature	Fc1ccc(-c2sc(NC(=O)N)c(C(=O)N)c2)cc1	1.318	98.21	279.295	98.21	0
AXL	AXL_30362749	Fluorescent ligand-binding assay	J Am Chem Soc.	Binding Kinetics Survey of the Drugged Kinome	30362749	Kinase	NA	TSU-68 (SU6668)	O=C(O)CCc1c(C)c(/C=C/2\C(=O)Nc3c\2cccc3)[nH]c1C	6.54	-5.97	0.61	literature	O=C(O)CCc1c(C)c(/C=C/2\C(=O)Nc3c\2cccc3)[nH]c1C	2.374	82.19	310.353	82.19	0
AXL	AXL_30362749	Fluorescent ligand-binding assay	J Am Chem Soc.	Binding Kinetics Survey of the Drugged Kinome	30362749	Kinase	NA	Tivozanib (AV-951)	Clc1c(NC(=O)Nc2noc(C)c2)ccc(Oc2c3c(ncc2)cc(OC)c(OC)c3)c1	7.67	-7.14	0.42	literature	Clc1c(NC(=O)Nc2noc(C)c2)ccc(Oc2c3c(ncc2)cc(OC)c(OC)c3)c1	3.61574	107.74	454.87	107.74	3
AXL	AXL_30362749	Fluorescent ligand-binding assay	J Am Chem Soc.	Binding Kinetics Survey of the Drugged Kinome	30362749	Kinase	NA	VX-680 (MK-0457 - Tozasertib)	S(c1nc(Nc2n[nH]c(C)c2)cc(N2CCN(C)CC2)n1)c1ccc(NC(=O)C2CC2)cc1	6.29	-6.32	0.02	literature	S(c1nc(Nc2n[nH]c(C)c2)cc(N2CCN(C)CC2)n1)c1ccc(NC(=O)C2CC2)cc1	2.586	102.07	464.598	102.07	2
AXL	AXL_30362749	Fluorescent ligand-binding assay	J Am Chem Soc.	Binding Kinetics Survey of the Drugged Kinome	30362749	Kinase	NA	Vandetanib (Zactima)	Brc1cc(F)c(Nc2ncnc3c2cc(OC)c(OCC2CCN(C)CC2)c3)cc1	6.78	-6.4	0.4	literature	Brc1cc(F)c(Nc2ncnc3c2cc(OC)c(OCC2CCN(C)CC2)c3)cc1	4.16674	59.51	475.362	59.51	4
AXL	AXL_30362749	Fluorescent ligand-binding assay	J Am Chem Soc.	Binding Kinetics Survey of the Drugged Kinome	30362749	Kinase	NA	WZ3146	Clc1c(Oc2cc(NC(=O)C=C)ccc2)nc(Nc2ccc(N3CCN(C)CC3)cc2)nc1	6.64	-6.22	0.4	literature	Clc1c(Oc2cc(NC(=O)C=C)ccc2)nc(Nc2ccc(N3CCN(C)CC3)cc2)nc1	3.187	82.62	464.957	82.62	0
AXL	AXL_30362749	Fluorescent ligand-binding assay	J Am Chem Soc.	Binding Kinetics Survey of the Drugged Kinome	30362749	Kinase	NA	WZ4002	Clc1c(Oc2cc(NC(=O)C=C)ccc2)nc(Nc2c(OC)cc(N3CCN(C)CC3)cc2)nc1	5.67	-5.92	-0.05	literature	Clc1c(Oc2cc(NC(=O)C=C)ccc2)nc(Nc2c(OC)cc(N3CCN(C)CC3)cc2)nc1	3.178	91.85	494.983	91.85	0
AXL	AXL_30362749	Fluorescent ligand-binding assay	J Am Chem Soc.	Binding Kinetics Survey of the Drugged Kinome	30362749	Kinase	NA	WZ8040	Clc1c(Sc2cc(NC(=O)C=C)ccc2)nc(Nc2ccc(N3CCN(C)CC3)cc2)nc1	6.03	-5.65	0.51	literature	Clc1c(Sc2cc(NC(=O)C=C)ccc2)nc(Nc2ccc(N3CCN(C)CC3)cc2)nc1	3.823	73.39	481.024	73.39	0
BRAF	BRAF_30362749	Fluorescent ligand-binding assay	J Am Chem Soc.	Binding Kinetics Survey of the Drugged Kinome	30362749	Kinase	NA	AEE788 (NVP-AEE788)	N([C@H](C)c1ccccc1)c1ncnc2[nH]c(-c3ccc(CN4CCN(CC)CC4)cc3)cc12	5.47	-2.89	2.56	literature	N([C@H](C)c1ccccc1)c1ncnc2[nH]c(-c3ccc(CN4CCN(CC)CC4)cc3)cc12	4.119	60.08	440.595	60.08	0
BRAF	BRAF_30362749	Fluorescent ligand-binding assay	J Am Chem Soc.	Binding Kinetics Survey of the Drugged Kinome	30362749	Kinase	NA	AZ628	O=C(Nc1cc(Nc2cc3C(=O)N(C)C=Nc3cc2)c(C)cc1)c1cc(C(C#N)(C)C)ccc1	8.35	-5.1	3.25	literature	O=C(Nc1cc(Nc2cc3C(=O)N(C)C=Nc3cc2)c(C)cc1)c1cc(C(C#N)(C)C)ccc1	4.957	97.59	451.53	99.81	0
BRAF	BRAF_30362749	Fluorescent ligand-binding assay	J Am Chem Soc.	Binding Kinetics Survey of the Drugged Kinome	30362749	Kinase	NA	DCC-2036 (Rebastinib)	Fc1c(NC(=O)Nc2n(-c3cc4c(nccc4)cc3)nc(C(C)(C)C)c2)ccc(Oc2cc(C(=O)NC)ncc2)c1	6.96	-3.95	3.03	literature	Fc1c(NC(=O)Nc2n(-c3cc4c(nccc4)cc3)nc(C(C)(C)C)c2)ccc(Oc2cc(C(=O)NC)ncc2)c1	4.13	123.06	553.598	123.06	2
BRAF	BRAF_30362749	Fluorescent ligand-binding assay	J Am Chem Soc.	Binding Kinetics Survey of the Drugged Kinome	30362749	Kinase	NA	PCI-32765 (Ibrutinib)	O=C(C=C)N1C[C@H](n2nc(-c3ccc(Oc4ccccc4)cc3)c3c(N)ncnc23)CCC1	6.5	-5.06	1.38	literature	O=C(C=C)N1C[C@H](n2nc(-c3ccc(Oc4ccccc4)cc3)c3c(N)ncnc23)CCC1	3.24753	99.16	440.507	99.16	0
BRAF	BRAF_30362749	Fluorescent ligand-binding assay	J Am Chem Soc.	Binding Kinetics Survey of the Drugged Kinome	30362749	Kinase	NA	PLX-4720	Clc1cnc2[nH]cc(C(=O)c3c(F)c(NS(=O)(=O)CCC)ccc3F)c2c1	7.91	-6.32	3.61	literature	Clc1cnc2[nH]cc(C(=O)c3c(F)c(NS(=O)(=O)CCC)ccc3F)c2c1	3.58	91.92	413.832	91.92	0
BRAF	BRAF_30362749	Fluorescent ligand-binding assay	J Am Chem Soc.	Binding Kinetics Survey of the Drugged Kinome	30362749	Kinase	NA	Pazopanib HCl	S(=O)(=O)(N)c1c(C)ccc(Nc2nc(N(C)c3cc4nn(C)c(C)c4cc3)ccn2)c1	6.09	-4.96	1.25	literature	S(=O)(=O)(N)c1c(C)ccc(Nc2nc(N(C)c3cc4nn(C)c(C)c4cc3)ccn2)c1	1.865	119.03	437.528	119.03	4
BRAF	BRAF_30362749	Fluorescent ligand-binding assay	J Am Chem Soc.	Binding Kinetics Survey of the Drugged Kinome	30362749	Kinase	NA	SB590885	O(CCN(C)C)c1ccc(-c2[nH]c(c(-c3cc4c(/C(=N/O)/CC4)cc3)n2)-c2ccncc2)cc1	9.43	-6.94	1.42	literature	O(CCN(C)C)c1ccc(-c2[nH]c(c(-c3cc4c(/C(=N/O)/CC4)cc3)n2)-c2ccncc2)cc1	3.916	86.63	453.546	86.63	0
BRAF	BRAF_30362749	Fluorescent ligand-binding assay	J Am Chem Soc.	Binding Kinetics Survey of the Drugged Kinome	30362749	Kinase	NA	Tivozanib (AV-951)	Clc1c(NC(=O)Nc2noc(C)c2)ccc(Oc2c3c(ncc2)cc(OC)c(OC)c3)c1	6.56	-3.81	2.08	literature	Clc1c(NC(=O)Nc2noc(C)c2)ccc(Oc2c3c(ncc2)cc(OC)c(OC)c3)c1	3.61574	107.74	454.87	107.74	3
BTK	BTK_30362749	Fluorescent ligand-binding assay	J Am Chem Soc.	Binding Kinetics Survey of the Drugged Kinome	30362749	Kinase	NA	AEE788 (NVP-AEE788)	N([C@H](C)c1ccccc1)c1ncnc2[nH]c(-c3ccc(CN4CCN(CC)CC4)cc3)cc12	5.96	-5.49	0.48	literature	N([C@H](C)c1ccccc1)c1ncnc2[nH]c(-c3ccc(CN4CCN(CC)CC4)cc3)cc12	4.119	60.08	440.595	60.08	0
BTK	BTK_30362749	Fluorescent ligand-binding assay	J Am Chem Soc.	Binding Kinetics Survey of the Drugged Kinome	30362749	Kinase	NA	AT9283	O=C(Nc1c(-c2[nH]c3c(n2)cc(CN2CCOCC2)cc3)n[nH]c1)NC1CC1	7.15	-5.72	1.43	literature	O=C(Nc1c(-c2[nH]c3c(n2)cc(CN2CCOCC2)cc3)n[nH]c1)NC1CC1	1.13706	110.96	381.44	110.96
BTK	BTK_30362749	Fluorescent ligand-binding assay	J Am Chem Soc.	Binding Kinetics Survey of the Drugged Kinome	30362749	Kinase	NA	AZ 960	Fc1c(Nc2n[nH]c(C)c2)nc(N[C@@H](C)c2ccc(F)cc2)c(C#N)c1	6.06	-4.75	1.31	literature	Fc1c(Nc2n[nH]c(C)c2)nc(N[C@@H](C)c2ccc(F)cc2)c(C#N)c1	3.894	89.42	354.364	89.42	0
BTK	BTK_30362749	Fluorescent ligand-binding assay	J Am Chem Soc.	Binding Kinetics Survey of the Drugged Kinome	30362749	Kinase	NA	AZD4547	O=C(Nc1n[nH]c(CCc2cc(OC)cc(OC)c2)c1)c1ccc(N2C[C@@H](C)N[C@@H](C)C2)cc1	5.81	-5.69	0.12	literature	O=C(Nc1n[nH]c(CCc2cc(OC)cc(OC)c2)c1)c1ccc(N2C[C@@H](C)N[C@@H](C)C2)cc1	3.948	91.51	463.582	91.51	2
BTK	BTK_30362749	Fluorescent ligand-binding assay	J Am Chem Soc.	Binding Kinetics Survey of the Drugged Kinome	30362749	Kinase	NA	AZD7762	Fc1cc(-c2sc(C(=O)N[C@@H]3CNCCC3)c(NC(=O)N)c2)ccc1	7.18	-5.58	1.61	literature	Fc1cc(-c2sc(C(=O)N[C@@H]3CNCCC3)c(NC(=O)N)c2)ccc1	1.64	96.25	362.429	96.25	0
BTK	BTK_30362749	Fluorescent ligand-binding assay	J Am Chem Soc.	Binding Kinetics Survey of the Drugged Kinome	30362749	Kinase	NA	AZD8931	Clc1c(F)c(Nc2ncnc3c2cc(OC2CCN(CC(=O)NC)CC2)c(OC)c3)ccc1	5.95	-4.88	1.07	literature	Clc1c(F)c(Nc2ncnc3c2cc(OC2CCN(CC(=O)NC)CC2)c(OC)c3)ccc1	2.88274	88.61	473.936	88.61	2
BTK	BTK_30362749	Fluorescent ligand-binding assay	J Am Chem Soc.	Binding Kinetics Survey of the Drugged Kinome	30362749	Kinase	NA	BIBF1120 (Vargatef)	O=C(N(C)c1ccc(N/C(/c2ccccc2)=C/2\C(=O)Nc3c\2ccc(C(=O)OC)c3)cc1)CN1CCN(C)CC1	7.1	-5.75	1.35	literature	O=C(N(C)c1ccc(N/C(/c2ccccc2)=C/2\C(=O)Nc3c\2ccc(C(=O)OC)c3)cc1)CN1CCN(C)CC1	3.507	94.22	539.636	94.22	0
BTK	BTK_30362749	Fluorescent ligand-binding assay	J Am Chem Soc.	Binding Kinetics Survey of the Drugged Kinome	30362749	Kinase	NA	BIX 02188	O=C(N)c1cc2NC(=O)/C(=C(\Nc3cc(CN(C)C)ccc3)/c3ccccc3)/c2cc1	5.6	-5	0.67	literature	O=C(N)c1cc2NC(=O)/C(=C(\Nc3cc(CN(C)C)ccc3)/c3ccccc3)/c2cc1	3.831	87.46	412.493	87.46	0
BTK	BTK_30362749	Fluorescent ligand-binding assay	J Am Chem Soc.	Binding Kinetics Survey of the Drugged Kinome	30362749	Kinase	NA	BX-912	Brc1c(NCCc2[nH]cnc2)nc(Nc2cc(NC(=O)N3CCCC3)ccc2)nc1	5.76	-5.11	0.66	literature	Brc1c(NCCc2[nH]cnc2)nc(Nc2cc(NC(=O)N3CCCC3)ccc2)nc1	1.234	110.86	471.363	110.86	0
BTK	BTK_30362749	Fluorescent ligand-binding assay	J Am Chem Soc.	Binding Kinetics Survey of the Drugged Kinome	30362749	Kinase	NA	Barasertib (AZD1152-HQPA)	P(=O)(OCCN(CCCOc1cc2ncnc(Nc3[nH]nc(CC(=O)Nc4cc(F)ccc4)c3)c2cc1)CC)(O)O	5.98	-4.89	1.09	literature	P(=O)(OCCN(CCCOc1cc2ncnc(Nc3[nH]nc(CC(=O)Nc4cc(F)ccc4)c3)c2cc1)CC)(O)O	1.886	174.82	587.549	174.82
BTK	BTK_30362749	Fluorescent ligand-binding assay	J Am Chem Soc.	Binding Kinetics Survey of the Drugged Kinome	30362749	Kinase	NA	Bosutinib (SKI-606)	Clc1c(OC)cc(Nc2c(C#N)cnc3c2cc(OC)c(OCCCN2CCN(C)CC2)c3)c(Cl)c1	8.21	-6.25	1.97	literature	Clc1c(OC)cc(Nc2c(C#N)cnc3c2cc(OC)c(OCCCN2CCN(C)CC2)c3)c(Cl)c1	3.93474	82.88	530.456	82.88	4
BTK	BTK_30362749	Fluorescent ligand-binding assay	J Am Chem Soc.	Binding Kinetics Survey of the Drugged Kinome	30362749	Kinase	NA	CHIR-124	Clc1cc2C(N[C@H]3C4CCN(C3)CC4)=C(c3[nH]c4c(n3)cccc4)C(=O)Nc2cc1	5.35	-3.37	2.02	literature	Clc1cc2C(N[C@H]3C4CCN(C3)CC4)=C(c3[nH]c4c(n3)cccc4)C(=O)Nc2cc1	3.375	73.05	419.916	76.81	0
BTK	BTK_30362749	Fluorescent ligand-binding assay	J Am Chem Soc.	Binding Kinetics Survey of the Drugged Kinome	30362749	Kinase	NA	CX-4945 (Silmitasertib)	Clc1cc(Nc2nc3c(c4c2ccnc4)ccc(C(=O)O)c3)ccc1	5.23	-4.43	0.75	literature	Clc1cc(Nc2nc3c(c4c2ccnc4)ccc(C(=O)O)c3)ccc1	4.223	75.11	349.777	75.11	2
BTK	BTK_30362749	Fluorescent ligand-binding assay	J Am Chem Soc.	Binding Kinetics Survey of the Drugged Kinome	30362749	Kinase	NA	CYC116	N(c1nc(-c2c(C)nc(N)s2)ccn1)c1ccc(N2CCOCC2)cc1	5.8	-5.26	0.54	literature	N(c1nc(-c2c(C)nc(N)s2)ccn1)c1ccc(N2CCOCC2)cc1	1.126	89.19	368.465	89.19	1
BTK	BTK_30362749	Fluorescent ligand-binding assay	J Am Chem Soc.	Binding Kinetics Survey of the Drugged Kinome	30362749	Kinase	NA	Cediranib (AZD2171)	Fc1c(Oc2ncnc3c2cc(OC)c(OCCCN2CCCC2)c3)ccc2[nH]c(C)cc12	5.93	-5.26	0.67	literature	Fc1c(Oc2ncnc3c2cc(OC)c(OCCCN2CCCC2)c3)ccc2[nH]c(C)cc12	4.21274	72.5	450.514	72.5	3
BTK	BTK_30362749	Fluorescent ligand-binding assay	J Am Chem Soc.	Binding Kinetics Survey of the Drugged Kinome	30362749	Kinase	NA	DCC-2036 (Rebastinib)	Fc1c(NC(=O)Nc2n(-c3cc4c(nccc4)cc3)nc(C(C)(C)C)c2)ccc(Oc2cc(C(=O)NC)ncc2)c1	6.24	-4.11	2.13	literature	Fc1c(NC(=O)Nc2n(-c3cc4c(nccc4)cc3)nc(C(C)(C)C)c2)ccc(Oc2cc(C(=O)NC)ncc2)c1	4.13	123.06	553.598	123.06	2
BTK	BTK_30362749	Fluorescent ligand-binding assay	J Am Chem Soc.	Binding Kinetics Survey of the Drugged Kinome	30362749	Kinase	NA	Dabrafenib (GSK2118436)	S(=O)(=O)(Nc1c(F)c(-c2c(-c3nc(N)ncc3)sc(C(C)(C)C)n2)ccc1)c1c(F)cccc1F	6.92	-5.63	1.3	literature	S(=O)(=O)(Nc1c(F)c(-c2c(-c3nc(N)ncc3)sc(C(C)(C)C)n2)ccc1)c1c(F)cccc1F	4.291	110.86	519.572	110.86	4
BTK	BTK_30362749	Fluorescent ligand-binding assay	J Am Chem Soc.	Binding Kinetics Survey of the Drugged Kinome	30362749	Kinase	NA	Danusertib (PHA-739358)	O=C([C@H](OC)c1ccccc1)N1Cc2c(NC(=O)c3ccc(N4CCN(C)CC4)cc3)n[nH]c2C1	6.17	-5.58	0.59	literature	O=C([C@H](OC)c1ccccc1)N1Cc2c(NC(=O)c3ccc(N4CCN(C)CC4)cc3)n[nH]c2C1	2.235	93.8	474.565	93.8	0
BTK	BTK_30362749	Fluorescent ligand-binding assay	J Am Chem Soc.	Binding Kinetics Survey of the Drugged Kinome	30362749	Kinase	NA	Dasatinib (BMS-354825)	Clc1c(NC(=O)c2sc(Nc3nc(C)nc(N4CCN(CCO)CC4)c3)nc2)c(C)ccc1	9.64	-6.83	2.81	literature	Clc1c(NC(=O)c2sc(Nc3nc(C)nc(N4CCN(CCO)CC4)c3)nc2)c(C)ccc1	1.535	106.51	488.016	106.51	4
BTK	BTK_30362749	Fluorescent ligand-binding assay	J Am Chem Soc.	Binding Kinetics Survey of the Drugged Kinome	30362749	Kinase	NA	Desmethyl Erlotinib (CP-473420)	O(CCOc1c(OCCO)cc2c(Nc3cc(C#C)ccc3)ncnc2c1)C	5.42	-4.99	0.46	literature	O(CCOc1c(OCCO)cc2c(Nc3cc(C#C)ccc3)ncnc2c1)C	1.97548	85.73	379.416	85.73	0
BTK	BTK_30362749	Fluorescent ligand-binding assay	J Am Chem Soc.	Binding Kinetics Survey of the Drugged Kinome	30362749	Kinase	NA	Dovitinib (TKI-258)	Fc1c2C(N)=C(c3[nH]c4c(n3)ccc(N3CCN(C)CC3)c4)C(=O)Nc2ccc1	6.04	-5.93	0.13	literature	Fc1c2C(N)=C(c3[nH]c4c(n3)ccc(N3CCN(C)CC3)c4)C(=O)Nc2ccc1	1.59	90.28	392.438	94.04	3
BTK	BTK_30362749	Fluorescent ligand-binding assay	J Am Chem Soc.	Binding Kinetics Survey of the Drugged Kinome	30362749	Kinase	NA	E7080 (Lenvatinib)	Clc1c(NC(=O)NC2CC2)ccc(Oc2c3c(ncc2)cc(OC)c(C(=O)N)c3)c1	5.3	-4.06	1.25	literature	Clc1c(NC(=O)NC2CC2)ccc(Oc2c3c(ncc2)cc(OC)c(C(=O)N)c3)c1	2.902	115.57	426.86	115.57	0
BTK	BTK_30362749	Fluorescent ligand-binding assay	J Am Chem Soc.	Binding Kinetics Survey of the Drugged Kinome	30362749	Kinase	NA	ENMD-2076	N(c1nc(/C=C/c2ccccc2)nc(N2CCN(C)CC2)c1)c1n[nH]c(C)c1	6.55	-6	0.56	literature	N(c1nc(/C=C/c2ccccc2)nc(N2CCN(C)CC2)c1)c1n[nH]c(C)c1	2.969	72.97	375.48	72.97	0
BTK	BTK_30362749	Fluorescent ligand-binding assay	J Am Chem Soc.	Binding Kinetics Survey of the Drugged Kinome	30362749	Kinase	NA	Foretinib (GSK1363089 - XL880)	Fc1c(Oc2c3c(ncc2)cc(OCCCN2CCOCC2)c(OC)c3)ccc(NC(=O)C2(C(=O)Nc3ccc(F)cc3)CC2)c1	7.55	-5.62	1.93	literature	Fc1c(Oc2c3c(ncc2)cc(OCCCN2CCOCC2)c(OC)c3)ccc(NC(=O)C2(C(=O)Nc3ccc(F)cc3)CC2)c1	4.59374	111.25	632.664	111.25	2
BTK	BTK_30362749	Fluorescent ligand-binding assay	J Am Chem Soc.	Binding Kinetics Survey of the Drugged Kinome	30362749	Kinase	NA	GDC-0980 (RG7422)	O=C([C@@H](O)C)N1CCN(Cc2c(C)c3nc(-c4cnc(N)nc4)nc(N4CCOCC4)c3s2)CC1	6.43	-4.95	1.47	literature	O=C([C@@H](O)C)N1CCN(Cc2c(C)c3nc(-c4cnc(N)nc4)nc(N4CCOCC4)c3s2)CC1	-1.016	133.83	498.612	133.83	2
BTK	BTK_30362749	Fluorescent ligand-binding assay	J Am Chem Soc.	Binding Kinetics Survey of the Drugged Kinome	30362749	Kinase	NA	Hesperadin	S(=O)(=O)(Nc1cc2/C(=C(/Nc3ccc(CN4CCCCC4)cc3)\c3ccccc3)/C(=O)Nc2cc1)CC	7.68	-6.51	1.17	literature	S(=O)(=O)(Nc1cc2/C(=C(/Nc3ccc(CN4CCCCC4)cc3)\c3ccccc3)/C(=O)Nc2cc1)CC	5.433	90.54	516.666	90.54	0
BTK	BTK_30362749	Fluorescent ligand-binding assay	J Am Chem Soc.	Binding Kinetics Survey of the Drugged Kinome	30362749	Kinase	NA	JNJ-7706621	S(=O)(=O)(N)c1ccc(Nc2nn(C(=O)c3c(F)cccc3F)c(N)n2)cc1	5.91	-4.93	0.98	literature	S(=O)(=O)(N)c1ccc(Nc2nn(C(=O)c3c(F)cccc3F)c(N)n2)cc1	0.89	145.99	394.362	145.99	0
BTK	BTK_30362749	Fluorescent ligand-binding assay	J Am Chem Soc.	Binding Kinetics Survey of the Drugged Kinome	30362749	Kinase	NA	Ki8751	Fc1c(NC(=O)Nc2c(F)cc(Oc3c4c(ncc3)cc(OC)c(OC)c4)cc2)ccc(F)c1	5.67	-5.11	0.72	literature	Fc1c(NC(=O)Nc2c(F)cc(Oc3c4c(ncc3)cc(OC)c(OC)c4)cc2)ccc(F)c1	4.56974	81.71	469.419	81.71	0
BTK	BTK_30362749	Fluorescent ligand-binding assay	J Am Chem Soc.	Binding Kinetics Survey of the Drugged Kinome	30362749	Kinase	NA	LY2784544	Clc1cc(F)c(Cc2c(C)nc3C(CN4CCOCC4)=CC(Nc4n[nH]c(C)c4)=Nn23)cc1	5.9	-6.01	-0.12	literature	Clc1cc(F)c(Cc2c(C)nc3C(CN4CCOCC4)=CC(Nc4n[nH]c(C)c4)=Nn23)cc1	3.368	83.36	469.952	83.37	2
BTK	BTK_30362749	Fluorescent ligand-binding assay	J Am Chem Soc.	Binding Kinetics Survey of the Drugged Kinome	30362749	Kinase	NA	MGCD-265	S=C(NC(=O)Cc1ccc(F)cc1)Nc1cc(F)c(Oc2c3sc(-c4ncc(CNCCOC)cc4)cc3ncc2)cc1	5.39	-4.25	1.13	literature	S=C(NC(=O)Cc1ccc(F)cc1)Nc1cc(F)c(Oc2c3sc(-c4ncc(CNCCOC)cc4)cc3ncc2)cc1	5.155	129.49	619.717	97.4	2
BTK	BTK_30362749	Fluorescent ligand-binding assay	J Am Chem Soc.	Binding Kinetics Survey of the Drugged Kinome	30362749	Kinase	NA	MK-5108 (VX-689)	Clc1c(F)c(OC2CCC(C(=O)O)(Cc3nc(Nc4sccn4)ccc3)CC2)ccc1	6.93	-6.71	0.28	literature	Clc1c(F)c(OC2CCC(C(=O)O)(Cc3nc(Nc4sccn4)ccc3)CC2)ccc1	4.806	84.34	461.945	84.34	0
BTK	BTK_30362749	Fluorescent ligand-binding assay	J Am Chem Soc.	Binding Kinetics Survey of the Drugged Kinome	30362749	Kinase	NA	MLN8054	Clc1cc2C(c3c(F)cccc3F)=NCc3c(nc(Nc4ccc(C(=O)O)cc4)nc3)-c2cc1	5.68	-4.79	0.91	literature	Clc1cc2C(c3c(F)cccc3F)=NCc3c(nc(Nc4ccc(C(=O)O)cc4)nc3)-c2cc1	5.189	87.47	476.87	87.47	0
BTK	BTK_30362749	Fluorescent ligand-binding assay	J Am Chem Soc.	Binding Kinetics Survey of the Drugged Kinome	30362749	Kinase	NA	Milciclib (PHA-848125)	O=C(NC)c1nn(C)c-2c1C(C)(C)Cc1c-2nc(Nc2ccc(N3CCN(C)CC3)cc2)nc1	5.82	-5.05	0.77	literature	O=C(NC)c1nn(C)c-2c1C(C)(C)Cc1c-2nc(Nc2ccc(N3CCN(C)CC3)cc2)nc1	0.92053	91.21	460.586	91.21	1
BTK	BTK_30362749	Fluorescent ligand-binding assay	J Am Chem Soc.	Binding Kinetics Survey of the Drugged Kinome	30362749	Kinase	NA	NVP-ADW742	O(Cc1ccccc1)c1cc(-c2c3c(N)ncnc3n(C3CC(CN4CCCC4)C3)c2)ccc1	6.15	-4.9	1.25	literature	O(Cc1ccccc1)c1cc(-c2c3c(N)ncnc3n(C3CC(CN4CCCC4)C3)c2)ccc1	5.319	69.2	453.59	69.2	0
BTK	BTK_30362749	Fluorescent ligand-binding assay	J Am Chem Soc.	Binding Kinetics Survey of the Drugged Kinome	30362749	Kinase	NA	NVP-BSK805	Fc1c(CN2CCOCC2)c(F)cc(-c2c3nc(-c4cn(C5CCNCC5)nc4)cnc3ccc2)c1	6.25	-5.67	0.57	literature	Fc1c(CN2CCOCC2)c(F)cc(-c2c3nc(-c4cn(C5CCNCC5)nc4)cnc3ccc2)c1	3.38953	68.1	490.558	68.1	0
BTK	BTK_30362749	Fluorescent ligand-binding assay	J Am Chem Soc.	Binding Kinetics Survey of the Drugged Kinome	30362749	Kinase	NA	NVP-TAE226	Clc1c(Nc2c(C(=O)NC)cccc2)nc(Nc2c(OC)cc(N3CCOCC3)cc2)nc1	6.74	-5.66	1.08	literature	Clc1c(Nc2c(C(=O)NC)cccc2)nc(Nc2c(OC)cc(N3CCOCC3)cc2)nc1	2.424	100.64	468.945	100.64	0
BTK	BTK_30362749	Fluorescent ligand-binding assay	J Am Chem Soc.	Binding Kinetics Survey of the Drugged Kinome	30362749	Kinase	NA	Neratinib (HKI-272)	Clc1c(OCc2ncccc2)ccc(Nc2c(C#N)cnc3c2cc(NC(=O)/C=C/CN(C)C)c(OCC)c3)c1	5.22	-4.42	0.84	literature	Clc1c(OCc2ncccc2)ccc(Nc2c(C#N)cnc3c2cc(NC(=O)/C=C/CN(C)C)c(OCC)c3)c1	4.3	112.4	557.054	112.4	4
BTK	BTK_30362749	Fluorescent ligand-binding assay	J Am Chem Soc.	Binding Kinetics Survey of the Drugged Kinome	30362749	Kinase	NA	PF-00562271	S(=O)(=O)(N(C)c1c(CNc2c(C(F)(F)F)cnc(Nc3cc4c(NC(=O)C4)cc3)n2)cccn1)C	6.05	-4.95	1.12	literature	S(=O)(=O)(N(C)c1c(CNc2c(C(F)(F)F)cnc(Nc3cc4c(NC(=O)C4)cc3)n2)cccn1)C	1.07576	129.21	507.497	129.21	0
BTK	BTK_30362749	Fluorescent ligand-binding assay	J Am Chem Soc.	Binding Kinetics Survey of the Drugged Kinome	30362749	Kinase	NA	PF-03814735	FC(F)(F)c1c(NC2CCC2)nc(Nc2cc3[C@@H]4N(C(=O)CNC(=O)C)[C@H](c3cc2)CC4)nc1	6.72	-6.08	0.63	literature	FC(F)(F)c1c(NC2CCC2)nc(Nc2cc3[C@@H]4N(C(=O)CNC(=O)C)[C@H](c3cc2)CC4)nc1	2.73576	99.25	474.487	99.25	0
BTK	BTK_30362749	Fluorescent ligand-binding assay	J Am Chem Soc.	Binding Kinetics Survey of the Drugged Kinome	30362749	Kinase	NA	PHA-680632	O=C(Nc1c(CC)cccc1CC)N1Cc2c(NC(=O)c3ccc(N4CCN(C)CC4)cc3)n[nH]c2C1	6.13	-5.01	1.13	literature	O=C(Nc1c(CC)cccc1CC)N1Cc2c(NC(=O)c3ccc(N4CCN(C)CC4)cc3)n[nH]c2C1	3.374	96.6	501.635	96.6	0
BTK	BTK_30362749	Fluorescent ligand-binding assay	J Am Chem Soc.	Binding Kinetics Survey of the Drugged Kinome	30362749	Kinase	NA	PP-121	Nc1ncnc2n(C3CCCC3)nc(-c3cnc4[nH]ccc4c3)c12	6.3	-4.95	1.34	literature	Nc1ncnc2n(C3CCCC3)nc(-c3cnc4[nH]ccc4c3)c12	1.75553	98.3	319.372	98.3	0
BTK	BTK_30362749	Fluorescent ligand-binding assay	J Am Chem Soc.	Binding Kinetics Survey of the Drugged Kinome	30362749	Kinase	NA	PP242	Oc1cc2c([nH]c(-c3nn(C(C)C)c4ncnc(N)c34)c2)cc1	5.91	-4.77	1.14	literature	Oc1cc2c([nH]c(-c3nn(C(C)C)c4ncnc(N)c34)c2)cc1	1.92806	105.64	308.345	105.64	0
BTK	BTK_30362749	Fluorescent ligand-binding assay	J Am Chem Soc.	Binding Kinetics Survey of the Drugged Kinome	30362749	Kinase	NA	Pazopanib HCl	S(=O)(=O)(N)c1c(C)ccc(Nc2nc(N(C)c3cc4nn(C)c(C)c4cc3)ccn2)c1	5.78	-4.93	0.84	literature	S(=O)(=O)(N)c1c(C)ccc(Nc2nc(N(C)c3cc4nn(C)c(C)c4cc3)ccn2)c1	1.865	119.03	437.528	119.03	4
BTK	BTK_30362749	Fluorescent ligand-binding assay	J Am Chem Soc.	Binding Kinetics Survey of the Drugged Kinome	30362749	Kinase	NA	Pelitinib (EKB-569)	Clc1c(F)ccc(Nc2c(C#N)cnc3c2cc(NC(=O)/C=C/CN(C)C)c(OCC)c3)c1	5.7	-4.49	1.22	literature	Clc1c(F)ccc(Nc2c(C#N)cnc3c2cc(NC(=O)/C=C/CN(C)C)c(OCC)c3)c1	3.98	90.28	467.932	90.28	0
BTK	BTK_30362749	Fluorescent ligand-binding assay	J Am Chem Soc.	Binding Kinetics Survey of the Drugged Kinome	30362749	Kinase	NA	Ponatinib (AP24534)	FC(F)(F)c1c(CN2CCN(C)CC2)ccc(NC(=O)c2cc(C#Cc3n4N=CC=Cc4nc3)c(C)cc2)c1	6.78	-5.12	1.65	literature	FC(F)(F)c1c(CN2CCN(C)CC2)ccc(NC(=O)c2cc(C#Cc3n4N=CC=Cc4nc3)c(C)cc2)c1	4.88476	65.76	532.57	65.77	4
BTK	BTK_30362749	Fluorescent ligand-binding assay	J Am Chem Soc.	Binding Kinetics Survey of the Drugged Kinome	30362749	Kinase	NA	R406	Fc1c(Nc2nc3NC(=O)C(C)(C)Oc3cc2)nc(Nc2cc(OC)c(OC)c(OC)c2)nc1	5.65	-5.54	0.26	literature	Fc1c(Nc2nc3NC(=O)C(C)(C)Oc3cc2)nc(Nc2cc(OC)c(OC)c(OC)c2)nc1	1.87148	128.75	470.461	128.75	2
BTK	BTK_30362749	Fluorescent ligand-binding assay	J Am Chem Soc.	Binding Kinetics Survey of the Drugged Kinome	30362749	Kinase	NA	Saracatinib (AZD0530)	Clc1c(Nc2ncnc3c2c(OC2CCOCC2)cc(OCCN2CCN(C)CC2)c3)c2OCOc2cc1	6.54	-5.63	0.92	literature	Clc1c(Nc2ncnc3c2c(OC2CCOCC2)cc(OCCN2CCN(C)CC2)c3)c2OCOc2cc1	2.962	90.44	542.036	90.44	3
BTK	BTK_30362749	Fluorescent ligand-binding assay	J Am Chem Soc.	Binding Kinetics Survey of the Drugged Kinome	30362749	Kinase	NA	Staurosporine	O(C)[C@@H]1[C@H](NC)C[C@H]2O[C@]1(C)n1c3c4n2c2c(c4c4C(=O)NCc4c3c3c1cccc3)cccc2	7.75	-6.44	1.31	literature	O(C)[C@@H]1[C@H](NC)C[C@H]2O[C@]1(C)n1c3c4n2c2c(c4c4C(=O)NCc4c3c3c1cccc3)cccc2	6.35953	69.45	466.541	69.45	0
BTK	BTK_30362749	Fluorescent ligand-binding assay	J Am Chem Soc.	Binding Kinetics Survey of the Drugged Kinome	30362749	Kinase	NA	TAE684 (NVP-TAE684)	Clc1c(Nc2c(S(=O)(=O)C(C)C)cccc2)nc(Nc2c(OC)cc(N3CCC(N4CCN(C)CC4)CC3)cc2)nc1	7.24	-5.76	1.49	literature	Clc1c(Nc2c(S(=O)(=O)C(C)C)cccc2)nc(Nc2c(OC)cc(N3CCC(N4CCN(C)CC4)CC3)cc2)nc1	3.959	102.93	614.215	102.93	0
BTK	BTK_30362749	Fluorescent ligand-binding assay	J Am Chem Soc.	Binding Kinetics Survey of the Drugged Kinome	30362749	Kinase	NA	TAK-285	Clc1c(Oc2cc(C(F)(F)F)ccc2)ccc(Nc2ncnc3c2n(CCNC(=O)CC(O)(C)C)cc3)c1	5.33	-4.63	0.78	literature	Clc1c(Oc2cc(C(F)(F)F)ccc2)ccc(Nc2ncnc3c2n(CCNC(=O)CC(O)(C)C)cc3)c1	5.27582	101.3	547.965	101.3	1
BTK	BTK_30362749	Fluorescent ligand-binding assay	J Am Chem Soc.	Binding Kinetics Survey of the Drugged Kinome	30362749	Kinase	NA	TAK-901	S(=O)(=O)(CC)c1cc(-c2c3c(c(C)c(C(=O)NC4CCN(C)CC4)c2)[nH]c2ncc(C)cc32)ccc1	7.46	-6.22	1.24	literature	S(=O)(=O)(CC)c1cc(-c2c3c(c(C)c(C(=O)NC4CCN(C)CC4)c2)[nH]c2ncc(C)cc32)ccc1	4.722	95.16	504.655	95.16	1
BTK	BTK_30362749	Fluorescent ligand-binding assay	J Am Chem Soc.	Binding Kinetics Survey of the Drugged Kinome	30362749	Kinase	NA	TG101209	S(=O)(=O)(NC(C)(C)C)c1cc(Nc2c(C)cnc(Nc3ccc(N4CCN(C)CC4)cc3)n2)ccc1	6.51	-6.37	0.15	literature	S(=O)(=O)(NC(C)(C)C)c1cc(Nc2c(C)cnc(Nc3ccc(N4CCN(C)CC4)cc3)n2)ccc1	3.143	102.49	509.679	102.49	0
BTK	BTK_30362749	Fluorescent ligand-binding assay	J Am Chem Soc.	Binding Kinetics Survey of the Drugged Kinome	30362749	Kinase	NA	TG101348 (SAR302503)	S(=O)(=O)(NC(C)(C)C)c1cc(Nc2c(C)cnc(Nc3ccc(OCCN4CCCC4)cc3)n2)ccc1	5.96	-5.27	0.7	literature	S(=O)(=O)(NC(C)(C)C)c1cc(Nc2c(C)cnc(Nc3ccc(OCCN4CCCC4)cc3)n2)ccc1	4.068	108.48	524.69	108.48	3
BTK	BTK_30362749	Fluorescent ligand-binding assay	J Am Chem Soc.	Binding Kinetics Survey of the Drugged Kinome	30362749	Kinase	NA	TPCA-1	Fc1ccc(-c2sc(NC(=O)N)c(C(=O)N)c2)cc1	6.32	-5.08	1.23	literature	Fc1ccc(-c2sc(NC(=O)N)c(C(=O)N)c2)cc1	1.318	98.21	279.295	98.21	0
BTK	BTK_30362749	Fluorescent ligand-binding assay	J Am Chem Soc.	Binding Kinetics Survey of the Drugged Kinome	30362749	Kinase	NA	TWS119	O(c1ncnc2[nH]c(-c3cc(N)ccc3)cc12)c1cc(O)ccc1	6.14	-5.23	0.9	literature	O(c1ncnc2[nH]c(-c3cc(N)ccc3)cc12)c1cc(O)ccc1	3.011	97.05	318.336	97.05	0
BTK	BTK_30362749	Fluorescent ligand-binding assay	J Am Chem Soc.	Binding Kinetics Survey of the Drugged Kinome	30362749	Kinase	NA	Tivozanib (AV-951)	Clc1c(NC(=O)Nc2noc(C)c2)ccc(Oc2c3c(ncc2)cc(OC)c(OC)c3)c1	6.29	-5.18	1.11	literature	Clc1c(NC(=O)Nc2noc(C)c2)ccc(Oc2c3c(ncc2)cc(OC)c(OC)c3)c1	3.61574	107.74	454.87	107.74	3
BTK	BTK_30362749	Fluorescent ligand-binding assay	J Am Chem Soc.	Binding Kinetics Survey of the Drugged Kinome	30362749	Kinase	NA	Torin 1	FC(F)(F)c1c(N2CCN(C(=O)CC)CC2)ccc(N2C(=O)C=Cc3c2c2c(nc3)ccc(-c3cnc4c(c3)cccc4)c2)c1	5.33	-2.93	2.4	literature	FC(F)(F)c1c(N2CCN(C(=O)CC)CC2)ccc(N2C(=O)C=Cc3c2c2c(nc3)ccc(-c3cnc4c(c3)cccc4)c2)c1	6.27576	69.64	607.636	71.33	0
BTK	BTK_30362749	Fluorescent ligand-binding assay	J Am Chem Soc.	Binding Kinetics Survey of the Drugged Kinome	30362749	Kinase	NA	VX-680 (MK-0457 - Tozasertib)	S(c1nc(Nc2n[nH]c(C)c2)cc(N2CCN(C)CC2)n1)c1ccc(NC(=O)C2CC2)cc1	5.82	-5.58	0.23	literature	S(c1nc(Nc2n[nH]c(C)c2)cc(N2CCN(C)CC2)n1)c1ccc(NC(=O)C2CC2)cc1	2.586	102.07	464.598	102.07	2
BTK	BTK_30362749	Fluorescent ligand-binding assay	J Am Chem Soc.	Binding Kinetics Survey of the Drugged Kinome	30362749	Kinase	NA	Vandetanib (Zactima)	Brc1cc(F)c(Nc2ncnc3c2cc(OC)c(OCC2CCN(C)CC2)c3)cc1	6.3	-5.45	0.85	literature	Brc1cc(F)c(Nc2ncnc3c2cc(OC)c(OCC2CCN(C)CC2)c3)cc1	4.16674	59.51	475.362	59.51	4
BTK	BTK_30362749	Fluorescent ligand-binding assay	J Am Chem Soc.	Binding Kinetics Survey of the Drugged Kinome	30362749	Kinase	NA	WZ4002	Clc1c(Oc2cc(NC(=O)C=C)ccc2)nc(Nc2c(OC)cc(N3CCN(C)CC3)cc2)nc1	8.05	-4	3.24	literature	Clc1c(Oc2cc(NC(=O)C=C)ccc2)nc(Nc2c(OC)cc(N3CCN(C)CC3)cc2)nc1	3.178	91.85	494.983	91.85	0
BTK	BTK_30362749	Fluorescent ligand-binding assay	J Am Chem Soc.	Binding Kinetics Survey of the Drugged Kinome	30362749	Kinase	NA	XL-184 (Cabozantinib)	Fc1ccc(NC(=O)C2(C(=O)Nc3ccc(Oc4c5c(ncc4)cc(OC)c(OC)c5)cc3)CC2)cc1	6.21	-5.29	0.93	literature	Fc1ccc(NC(=O)C2(C(=O)Nc3ccc(Oc4c5c(ncc4)cc(OC)c(OC)c5)cc3)CC2)cc1	4.52074	98.78	501.514	98.78	4
BTK	BTK_30362749	Fluorescent ligand-binding assay	J Am Chem Soc.	Binding Kinetics Survey of the Drugged Kinome	30362749	Kinase	NA	ZM-447439	O=C(Nc1ccc(Nc2ncnc3c2cc(OC)c(OCCCN2CCOCC2)c3)cc1)c1ccccc1	6	-5.71	0.29	literature	O=C(Nc1ccc(Nc2ncnc3c2cc(OC)c(OCCCN2CCOCC2)c3)cc1)c1ccccc1	3.32274	97.84	513.598	97.84	0
CDK2	CDK2_30362749	Fluorescent ligand-binding assay	J Am Chem Soc.	Binding Kinetics Survey of the Drugged Kinome	30362749	Kinase	NA	A-674563	O(C[C@@H](N)Cc1ccccc1)c1cc(-c2cc3c(C)n[nH]c3cc2)cnc1	5.62	-2.67	2.95	literature	O(C[C@@H](N)Cc1ccccc1)c1cc(-c2cc3c(C)n[nH]c3cc2)cnc1	3.865	76.82	358.445	76.82	0
CDK2	CDK2_30362749	Fluorescent ligand-binding assay	J Am Chem Soc.	Binding Kinetics Survey of the Drugged Kinome	30362749	Kinase	NA	AS-252424	Fc1cc(O)c(-c2oc(/C=C\3/C(=O)NC(=O)S/3)cc2)cc1	5.64	-3.12	2.51	literature	Fc1cc(O)c(-c2oc(/C=C\3/C(=O)NC(=O)S/3)cc2)cc1	2.947	79.54	305.285	79.54	0
CDK2	CDK2_30362749	Fluorescent ligand-binding assay	J Am Chem Soc.	Binding Kinetics Survey of the Drugged Kinome	30362749	Kinase	NA	AS-605240	O=C1/C(=C\c2cc3nccnc3cc2)/SC(=O)N1	5.5	-3.12	2.38	literature	O=C1/C(=C\c2cc3nccnc3cc2)/SC(=O)N1	1.92753	71.95	257.273	71.95	0
CDK2	CDK2_30362749	Fluorescent ligand-binding assay	J Am Chem Soc.	Binding Kinetics Survey of the Drugged Kinome	30362749	Kinase	NA	AT7519	Clc1c(C(=O)Nc2c(C(=O)NC3CCNCC3)n[nH]c2)c(Cl)ccc1	6.93	-4.91	2.03	literature	Clc1c(C(=O)Nc2c(C(=O)NC3CCNCC3)n[nH]c2)c(Cl)ccc1	1.989	98.91	382.251	98.91	2
CDK2	CDK2_30362749	Fluorescent ligand-binding assay	J Am Chem Soc.	Binding Kinetics Survey of the Drugged Kinome	30362749	Kinase	NA	AT9283	O=C(Nc1c(-c2[nH]c3c(n2)cc(CN2CCOCC2)cc3)n[nH]c1)NC1CC1	6.42	-4.46	1.96	literature	O=C(Nc1c(-c2[nH]c3c(n2)cc(CN2CCOCC2)cc3)n[nH]c1)NC1CC1	1.13706	110.96	381.44	110.96
CDK2	CDK2_30362749	Fluorescent ligand-binding assay	J Am Chem Soc.	Binding Kinetics Survey of the Drugged Kinome	30362749	Kinase	NA	AZ 960	Fc1c(Nc2n[nH]c(C)c2)nc(N[C@@H](C)c2ccc(F)cc2)c(C#N)c1	6.21	-4.19	2.02	literature	Fc1c(Nc2n[nH]c(C)c2)nc(N[C@@H](C)c2ccc(F)cc2)c(C#N)c1	3.894	89.42	354.364	89.42	0
CDK2	CDK2_30362749	Fluorescent ligand-binding assay	J Am Chem Soc.	Binding Kinetics Survey of the Drugged Kinome	30362749	Kinase	NA	AZD4547	O=C(Nc1n[nH]c(CCc2cc(OC)cc(OC)c2)c1)c1ccc(N2C[C@@H](C)N[C@@H](C)C2)cc1	5.51	-3.27	2.25	literature	O=C(Nc1n[nH]c(CCc2cc(OC)cc(OC)c2)c1)c1ccc(N2C[C@@H](C)N[C@@H](C)C2)cc1	3.948	91.51	463.582	91.51	2
CDK2	CDK2_30362749	Fluorescent ligand-binding assay	J Am Chem Soc.	Binding Kinetics Survey of the Drugged Kinome	30362749	Kinase	NA	AZD5438	S(=O)(=O)(C)c1ccc(Nc2nc(-c3n(C(C)C)c(C)nc3)ccn2)cc1	6.92	-4.95	1.97	literature	S(=O)(=O)(C)c1ccc(Nc2nc(-c3n(C(C)C)c(C)nc3)ccn2)cc1	1.81453	89.77	371.465	89.77	0
CDK2	CDK2_30362749	Fluorescent ligand-binding assay	J Am Chem Soc.	Binding Kinetics Survey of the Drugged Kinome	30362749	Kinase	NA	BMS 794833	Clc1c(N)nccc1Oc1c(F)cc(NC(=O)C=2C(=O)C(c3ccc(F)cc3)=CNC=2)cc1	6.27	-4.21	2.06	literature	Clc1c(N)nccc1Oc1c(F)cc(NC(=O)C=2C(=O)C(c3ccc(F)cc3)=CNC=2)cc1	3.076	106.34	468.847	110.1	0
CDK2	CDK2_30362749	Fluorescent ligand-binding assay	J Am Chem Soc.	Binding Kinetics Survey of the Drugged Kinome	30362749	Kinase	NA	BMS-265246	Fc1c(C(=O)c2c(OCCCC)c3c([nH]nc3)nc2)c(F)cc(C)c1	7.29	-5.36	1.93	literature	Fc1c(C(=O)c2c(OCCCC)c3c([nH]nc3)nc2)c(F)cc(C)c1	4.48253	67.87	345.349	67.87
CDK2	CDK2_30362749	Fluorescent ligand-binding assay	J Am Chem Soc.	Binding Kinetics Survey of the Drugged Kinome	30362749	Kinase	NA	BX-795	Ic1c(NCCCNC(=O)c2sccc2)nc(Nc2cc(NC(=O)N3CCCC3)ccc2)nc1	6.59	-4.6	2	literature	Ic1c(NCCCNC(=O)c2sccc2)nc(Nc2cc(NC(=O)N3CCCC3)ccc2)nc1	3.106	111.28	591.478	111.28	0
CDK2	CDK2_30362749	Fluorescent ligand-binding assay	J Am Chem Soc.	Binding Kinetics Survey of the Drugged Kinome	30362749	Kinase	NA	BX-912	Brc1c(NCCc2[nH]cnc2)nc(Nc2cc(NC(=O)N3CCCC3)ccc2)nc1	6	-3.99	2.01	literature	Brc1c(NCCc2[nH]cnc2)nc(Nc2cc(NC(=O)N3CCCC3)ccc2)nc1	1.234	110.86	471.363	110.86	0
CDK2	CDK2_30362749	Fluorescent ligand-binding assay	J Am Chem Soc.	Binding Kinetics Survey of the Drugged Kinome	30362749	Kinase	NA	Bosutinib (SKI-606)	Clc1c(OC)cc(Nc2c(C#N)cnc3c2cc(OC)c(OCCCN2CCN(C)CC2)c3)c(Cl)c1	5.67	-3.22	2.46	literature	Clc1c(OC)cc(Nc2c(C#N)cnc3c2cc(OC)c(OCCCN2CCN(C)CC2)c3)c(Cl)c1	3.93474	82.88	530.456	82.88	4
CDK2	CDK2_30362749	Fluorescent ligand-binding assay	J Am Chem Soc.	Binding Kinetics Survey of the Drugged Kinome	30362749	Kinase	NA	CEP33779	S(=O)(=O)(C)c1ccc(C=2c3n(nc(Nc4cc(N5CCN(C)CC5)ccc4)n3)C=CC=2)cc1	5.58	-3.25	2.32	literature	S(=O)(=O)(C)c1ccc(C=2c3n(nc(Nc4cc(N5CCN(C)CC5)ccc4)n3)C=CC=2)cc1	1.624	83.36	462.578	82.84	0
CDK2	CDK2_30362749	Fluorescent ligand-binding assay	J Am Chem Soc.	Binding Kinetics Survey of the Drugged Kinome	30362749	Kinase	NA	CHIR-124	Clc1cc2C(N[C@H]3C4CCN(C3)CC4)=C(c3[nH]c4c(n3)cccc4)C(=O)Nc2cc1	6.28	-4.22	2.08	literature	Clc1cc2C(N[C@H]3C4CCN(C3)CC4)=C(c3[nH]c4c(n3)cccc4)C(=O)Nc2cc1	3.375	73.05	419.916	76.81	0
CDK2	CDK2_30362749	Fluorescent ligand-binding assay	J Am Chem Soc.	Binding Kinetics Survey of the Drugged Kinome	30362749	Kinase	NA	CP 673451	O(CCOc1cc2ncn(-c3nc4c(N5CCC(N)CC5)cccc4cc3)c2cc1)C	7.2	-5.22	1.98	literature	O(CCOc1cc2ncn(-c3nc4c(N5CCC(N)CC5)cccc4cc3)c2cc1)C	3.25174	78.43	417.513	78.43	0
CDK2	CDK2_30362749	Fluorescent ligand-binding assay	J Am Chem Soc.	Binding Kinetics Survey of the Drugged Kinome	30362749	Kinase	NA	CX-4945 (Silmitasertib)	Clc1cc(Nc2nc3c(c4c2ccnc4)ccc(C(=O)O)c3)ccc1	6.82	-4.73	2.09	literature	Clc1cc(Nc2nc3c(c4c2ccnc4)ccc(C(=O)O)c3)ccc1	4.223	75.11	349.777	75.11	2
CDK2	CDK2_30362749	Fluorescent ligand-binding assay	J Am Chem Soc.	Binding Kinetics Survey of the Drugged Kinome	30362749	Kinase	NA	CYC116	N(c1nc(-c2c(C)nc(N)s2)ccn1)c1ccc(N2CCOCC2)cc1	6.35	-4.34	2.01	literature	N(c1nc(-c2c(C)nc(N)s2)ccn1)c1ccc(N2CCOCC2)cc1	1.126	89.19	368.465	89.19	1
CDK2	CDK2_30362749	Fluorescent ligand-binding assay	J Am Chem Soc.	Binding Kinetics Survey of the Drugged Kinome	30362749	Kinase	NA	Crenolanib (CP-868596)	O(CC1(C)COC1)c1cc2ncn(-c3nc4c(N5CCC(N)CC5)cccc4cc3)c2cc1	7.09	-5.01	2.09	literature	O(CC1(C)COC1)c1cc2ncn(-c3nc4c(N5CCC(N)CC5)cccc4cc3)c2cc1	3.834	78.43	443.551	78.43	3
CDK2	CDK2_30362749	Fluorescent ligand-binding assay	J Am Chem Soc.	Binding Kinetics Survey of the Drugged Kinome	30362749	Kinase	NA	Cyt387	O=C(NCC#N)c1ccc(-c2nc(Nc3ccc(N4CCOCC4)cc3)ncc2)cc1	6.1	-4.14	1.95	literature	O=C(NCC#N)c1ccc(-c2nc(Nc3ccc(N4CCOCC4)cc3)ncc2)cc1	1.468	103.17	414.469	103.17	3
CDK2	CDK2_30362749	Fluorescent ligand-binding assay	J Am Chem Soc.	Binding Kinetics Survey of the Drugged Kinome	30362749	Kinase	NA	DCC-2036 (Rebastinib)	Fc1c(NC(=O)Nc2n(-c3cc4c(nccc4)cc3)nc(C(C)(C)C)c2)ccc(Oc2cc(C(=O)NC)ncc2)c1	7.44	-4.71	2.73	literature	Fc1c(NC(=O)Nc2n(-c3cc4c(nccc4)cc3)nc(C(C)(C)C)c2)ccc(Oc2cc(C(=O)NC)ncc2)c1	4.13	123.06	553.598	123.06	2
CDK2	CDK2_30362749	Fluorescent ligand-binding assay	J Am Chem Soc.	Binding Kinetics Survey of the Drugged Kinome	30362749	Kinase	NA	Dabrafenib (GSK2118436)	S(=O)(=O)(Nc1c(F)c(-c2c(-c3nc(N)ncc3)sc(C(C)(C)C)n2)ccc1)c1c(F)cccc1F	6.71	-4.47	2.26	literature	S(=O)(=O)(Nc1c(F)c(-c2c(-c3nc(N)ncc3)sc(C(C)(C)C)n2)ccc1)c1c(F)cccc1F	4.291	110.86	519.572	110.86	4
CDK2	CDK2_30362749	Fluorescent ligand-binding assay	J Am Chem Soc.	Binding Kinetics Survey of the Drugged Kinome	30362749	Kinase	NA	Dinaciclib (SCH727965)	OCC[C@H]1N(C2=Nc3c(CC)cnn3C(NCc3c[n+]([O-])ccc3)=C2)CCCC1	7.13	-5.15	1.99	literature	OCC[C@H]1N(C2=Nc3c(CC)cnn3C(NCc3c[n+]([O-])ccc3)=C2)CCCC1	2.707	91.14	396.495	92.63	3
CDK2	CDK2_30362749	Fluorescent ligand-binding assay	J Am Chem Soc.	Binding Kinetics Survey of the Drugged Kinome	30362749	Kinase	NA	Dovitinib (TKI-258)	Fc1c2C(N)=C(c3[nH]c4c(n3)ccc(N3CCN(C)CC3)c4)C(=O)Nc2ccc1	5.32	-3.01	2.31	literature	Fc1c2C(N)=C(c3[nH]c4c(n3)ccc(N3CCN(C)CC3)c4)C(=O)Nc2ccc1	1.59	90.28	392.438	94.04	3
CDK2	CDK2_30362749	Fluorescent ligand-binding assay	J Am Chem Soc.	Binding Kinetics Survey of the Drugged Kinome	30362749	Kinase	NA	Flavopiridol HCl	Clc1c(C=2Oc3c([C@@H]4[C@H](O)CN(C)CC4)c(O)cc(O)c3C(=O)C=2)cccc1	6.09	-4.16	1.93	literature	Clc1c(C=2Oc3c([C@@H]4[C@H](O)CN(C)CC4)c(O)cc(O)c3C(=O)C=2)cccc1	2.902	90.23	401.846	94.14	0
CDK2	CDK2_30362749	Fluorescent ligand-binding assay	J Am Chem Soc.	Binding Kinetics Survey of the Drugged Kinome	30362749	Kinase	NA	GSK1059615	O=C1/C(=C/c2cc3c(-c4ccncc4)ccnc3cc2)/SC(=O)N1	5.35	-3.32	2.07	literature	O=C1/C(=C/c2cc3c(-c4ccncc4)ccnc3cc2)/SC(=O)N1	3.478	71.95	333.371	71.95	1
CDK2	CDK2_30362749	Fluorescent ligand-binding assay	J Am Chem Soc.	Binding Kinetics Survey of the Drugged Kinome	30362749	Kinase	NA	GSK690693	O(C[C@@H]1CNCCC1)c1c2n(CC)c(-c3c(N)non3)nc2c(C#CC(O)(C)C)nc1	5.38	-2.76	2.6	literature	O(C[C@@H]1CNCCC1)c1c2n(CC)c(-c3c(N)non3)nc2c(C#CC(O)(C)C)nc1	2.31459	137.14	425.493	137.14	0
CDK2	CDK2_30362749	Fluorescent ligand-binding assay	J Am Chem Soc.	Binding Kinetics Survey of the Drugged Kinome	30362749	Kinase	NA	Golvatinib (E7050)	Fc1c(NC(=O)C2(C(=O)Nc3ccc(F)cc3)CC2)ccc(Oc2cc(NC(=O)N3CCC(N4CCN(C)CC4)CC3)ncc2)c1	5.58	-3.26	2.33	literature	Fc1c(NC(=O)C2(C(=O)Nc3ccc(F)cc3)CC2)ccc(Oc2cc(NC(=O)N3CCC(N4CCN(C)CC4)CC3)ncc2)c1	3.17	119.14	633.7	119.14	0
CDK2	CDK2_30362749	Fluorescent ligand-binding assay	J Am Chem Soc.	Binding Kinetics Survey of the Drugged Kinome	30362749	Kinase	NA	Hesperadin	S(=O)(=O)(Nc1cc2/C(=C(/Nc3ccc(CN4CCCCC4)cc3)\c3ccccc3)/C(=O)Nc2cc1)CC	5.58	-3.51	2.08	literature	S(=O)(=O)(Nc1cc2/C(=C(/Nc3ccc(CN4CCCCC4)cc3)\c3ccccc3)/C(=O)Nc2cc1)CC	5.433	90.54	516.666	90.54	0
CDK2	CDK2_30362749	Fluorescent ligand-binding assay	J Am Chem Soc.	Binding Kinetics Survey of the Drugged Kinome	30362749	Kinase	NA	JNJ-7706621	S(=O)(=O)(N)c1ccc(Nc2nn(C(=O)c3c(F)cccc3F)c(N)n2)cc1	7.8	-5.72	2.07	literature	S(=O)(=O)(N)c1ccc(Nc2nn(C(=O)c3c(F)cccc3F)c(N)n2)cc1	0.89	145.99	394.362	145.99	0
CDK2	CDK2_30362749	Fluorescent ligand-binding assay	J Am Chem Soc.	Binding Kinetics Survey of the Drugged Kinome	30362749	Kinase	NA	LY2784544	Clc1cc(F)c(Cc2c(C)nc3C(CN4CCOCC4)=CC(Nc4n[nH]c(C)c4)=Nn23)cc1	6.36	-4.25	2.11	literature	Clc1cc(F)c(Cc2c(C)nc3C(CN4CCOCC4)=CC(Nc4n[nH]c(C)c4)=Nn23)cc1	3.368	83.36	469.952	83.37	2
CDK2	CDK2_30362749	Fluorescent ligand-binding assay	J Am Chem Soc.	Binding Kinetics Survey of the Drugged Kinome	30362749	Kinase	NA	Linifanib (ABT-869)	Fc1c(NC(=O)Nc2ccc(-c3c4c(N)n[nH]c4ccc3)cc2)cc(C)cc1	5.78	-3.12	2.66	literature	Fc1c(NC(=O)Nc2ccc(-c3c4c(N)n[nH]c4ccc3)cc2)cc(C)cc1	4.535	95.83	375.407	95.83	3
CDK2	CDK2_30362749	Fluorescent ligand-binding assay	J Am Chem Soc.	Binding Kinetics Survey of the Drugged Kinome	30362749	Kinase	NA	MK-2461	S(=O)(=O)(N(C[C@H]1OCCOC1)C)Nc1cc2C(=O)c3c(ncc(-c4cn(C)nc4)c3)C=Cc2cc1	5.45	-3.26	2.2	literature	S(=O)(=O)(N(C[C@H]1OCCOC1)C)Nc1cc2C(=O)c3c(ncc(-c4cn(C)nc4)c3)C=Cc2cc1	1.038	115.65	495.56	115.65	0
CDK2	CDK2_30362749	Fluorescent ligand-binding assay	J Am Chem Soc.	Binding Kinetics Survey of the Drugged Kinome	30362749	Kinase	NA	MK-5108 (VX-689)	Clc1c(F)c(OC2CCC(C(=O)O)(Cc3nc(Nc4sccn4)ccc3)CC2)ccc1	6.06	-4.2	1.87	literature	Clc1c(F)c(OC2CCC(C(=O)O)(Cc3nc(Nc4sccn4)ccc3)CC2)ccc1	4.806	84.34	461.945	84.34	0
CDK2	CDK2_30362749	Fluorescent ligand-binding assay	J Am Chem Soc.	Binding Kinetics Survey of the Drugged Kinome	30362749	Kinase	NA	Milciclib (PHA-848125)	O=C(NC)c1nn(C)c-2c1C(C)(C)Cc1c-2nc(Nc2ccc(N3CCN(C)CC3)cc2)nc1	6.49	-4.62	1.87	literature	O=C(NC)c1nn(C)c-2c1C(C)(C)Cc1c-2nc(Nc2ccc(N3CCN(C)CC3)cc2)nc1	0.92053	91.21	460.586	91.21	1
CDK2	CDK2_30362749	Fluorescent ligand-binding assay	J Am Chem Soc.	Binding Kinetics Survey of the Drugged Kinome	30362749	Kinase	NA	NVP-BGT226	FC(F)(F)c1c(N2CCNCC2)ccc(N2C(=O)N(C)c3c2c2c(nc3)ccc(-c3cnc(OC)cc3)c2)c1.O=C(O)/C=C\C(=O)O	5.53	-3.22	2.3	literature	FC(F)(F)c1c(N2CCNCC2)ccc(N2C(=O)N(C)c3c2c2c(nc3)ccc(-c3cnc(OC)cc3)c2)c1	4.03876	73.83	534.542	77.21	2
CDK2	CDK2_30362749	Fluorescent ligand-binding assay	J Am Chem Soc.	Binding Kinetics Survey of the Drugged Kinome	30362749	Kinase	NA	NVP-TAE226	Clc1c(Nc2c(C(=O)NC)cccc2)nc(Nc2c(OC)cc(N3CCOCC3)cc2)nc1	5.42	-3.04	2.35	literature	Clc1c(Nc2c(C(=O)NC)cccc2)nc(Nc2c(OC)cc(N3CCOCC3)cc2)nc1	2.424	100.64	468.945	100.64	0
CDK2	CDK2_30362749	Fluorescent ligand-binding assay	J Am Chem Soc.	Binding Kinetics Survey of the Drugged Kinome	30362749	Kinase	NA	Neratinib (HKI-272)	Clc1c(OCc2ncccc2)ccc(Nc2c(C#N)cnc3c2cc(NC(=O)/C=C/CN(C)C)c(OCC)c3)c1	5.45	-3.2	2.25	literature	Clc1c(OCc2ncccc2)ccc(Nc2c(C#N)cnc3c2cc(NC(=O)/C=C/CN(C)C)c(OCC)c3)c1	4.3	112.4	557.054	112.4	4
CDK2	CDK2_30362749	Fluorescent ligand-binding assay	J Am Chem Soc.	Binding Kinetics Survey of the Drugged Kinome	30362749	Kinase	NA	PD 0332991 (Palbociclib) HCl	O=C(C)C=1C(=O)N(C2CCCC2)c2nc(Nc3ncc(N4CCNCC4)cc3)ncc2C=1C	5.62	-3.43	2.18	literature	O=C(C)C=1C(=O)N(C2CCCC2)c2nc(Nc3ncc(N4CCNCC4)cc3)ncc2C=1C	1.161	103.35	447.543	105.04	0
CDK2	CDK2_30362749	Fluorescent ligand-binding assay	J Am Chem Soc.	Binding Kinetics Survey of the Drugged Kinome	30362749	Kinase	NA	PF-00562271	S(=O)(=O)(N(C)c1c(CNc2c(C(F)(F)F)cnc(Nc3cc4c(NC(=O)C4)cc3)n2)cccn1)C	6.79	-4.77	2.02	literature	S(=O)(=O)(N(C)c1c(CNc2c(C(F)(F)F)cnc(Nc3cc4c(NC(=O)C4)cc3)n2)cccn1)C	1.07576	129.21	507.497	129.21	0
CDK2	CDK2_30362749	Fluorescent ligand-binding assay	J Am Chem Soc.	Binding Kinetics Survey of the Drugged Kinome	30362749	Kinase	NA	PF-03814735	FC(F)(F)c1c(NC2CCC2)nc(Nc2cc3[C@@H]4N(C(=O)CNC(=O)C)[C@H](c3cc2)CC4)nc1	7.25	-4.58	1.91	literature	FC(F)(F)c1c(NC2CCC2)nc(Nc2cc3[C@@H]4N(C(=O)CNC(=O)C)[C@H](c3cc2)CC4)nc1	2.73576	99.25	474.487	99.25	0
CDK2	CDK2_30362749	Fluorescent ligand-binding assay	J Am Chem Soc.	Binding Kinetics Survey of the Drugged Kinome	30362749	Kinase	NA	PHA-767491	O=C1NCCc2[nH]c(-c3ccncc3)cc12	5.45	-3	2.45	literature	O=C1NCCc2[nH]c(-c3ccncc3)cc12	0.568	57.78	213.24	57.78	0
CDK2	CDK2_30362749	Fluorescent ligand-binding assay	J Am Chem Soc.	Binding Kinetics Survey of the Drugged Kinome	30362749	Kinase	NA	PHA-793887	O=C(Nc1n[nH]c2C(C)(C)N(C(=O)C3CCN(C)CC3)Cc12)CC(C)C	6.95	-4.74	2.25	literature	O=C(Nc1n[nH]c2C(C)(C)N(C(=O)C3CCN(C)CC3)Cc12)CC(C)C	1.804	81.33	361.49	81.33	1
CDK2	CDK2_30362749	Fluorescent ligand-binding assay	J Am Chem Soc.	Binding Kinetics Survey of the Drugged Kinome	30362749	Kinase	NA	PIK-75	BrC1=Cn2c(/C=N/N(S(=O)(=O)c3c(C)ccc([N+](=O)[O-])c3)C)cnc2C=C1	6.23	-4.33	1.9	literature	BrC1=Cn2c(/C=N/N(S(=O)(=O)c3c(C)ccc([N+](=O)[O-])c3)C)cnc2C=C1	3.093	113.38	452.289	110.18	0
CDK2	CDK2_30362749	Fluorescent ligand-binding assay	J Am Chem Soc.	Binding Kinetics Survey of the Drugged Kinome	30362749	Kinase	NA	PLX-4720	Clc1cnc2[nH]cc(C(=O)c3c(F)c(NS(=O)(=O)CCC)ccc3F)c2c1	5.58	-3.49	2.1	literature	Clc1cnc2[nH]cc(C(=O)c3c(F)c(NS(=O)(=O)CCC)ccc3F)c2c1	3.58	91.92	413.832	91.92	0
CDK2	CDK2_30362749	Fluorescent ligand-binding assay	J Am Chem Soc.	Binding Kinetics Survey of the Drugged Kinome	30362749	Kinase	NA	Ponatinib (AP24534)	FC(F)(F)c1c(CN2CCN(C)CC2)ccc(NC(=O)c2cc(C#Cc3n4N=CC=Cc4nc3)c(C)cc2)c1	5.93	-3.94	1.98	literature	FC(F)(F)c1c(CN2CCN(C)CC2)ccc(NC(=O)c2cc(C#Cc3n4N=CC=Cc4nc3)c(C)cc2)c1	4.88476	65.76	532.57	65.77	4
CDK2	CDK2_30362749	Fluorescent ligand-binding assay	J Am Chem Soc.	Binding Kinetics Survey of the Drugged Kinome	30362749	Kinase	NA	Quercetin (Sophoretin)	O=C1C(O)=C(c2cc(O)c(O)cc2)Oc2c1c(O)cc(O)c2	5.6	-3.14	2.45	literature	O=C1C(O)=C(c2cc(O)c(O)cc2)Oc2c1c(O)cc(O)c2	2.032	127.45	302.238	131.36	0
CDK2	CDK2_30362749	Fluorescent ligand-binding assay	J Am Chem Soc.	Binding Kinetics Survey of the Drugged Kinome	30362749	Kinase	NA	Raf265 derivative	FC(F)(F)c1[nH]c(-c2nccc(Oc3cc4nc(Nc5ccc(C(F)(F)F)cc5)n(C)c4cc3)c2)nc1	5.46	-3	2.48	literature	FC(F)(F)c1[nH]c(-c2nccc(Oc3cc4nc(Nc5ccc(C(F)(F)F)cc5)n(C)c4cc3)c2)nc1	5.62558	80.65	518.421	80.65	2
CDK2	CDK2_30362749	Fluorescent ligand-binding assay	J Am Chem Soc.	Binding Kinetics Survey of the Drugged Kinome	30362749	Kinase	NA	Roscovitine (Seliciclib - CYC202)	OC[C@H](Nc1nc(NCc2ccccc2)c2ncn(C(C)C)c2n1)CC	5.68	-3.68	2.03	literature	OC[C@H](Nc1nc(NCc2ccccc2)c2ncn(C(C)C)c2n1)CC	2.94206	87.89	354.458	87.89	0
CDK2	CDK2_30362749	Fluorescent ligand-binding assay	J Am Chem Soc.	Binding Kinetics Survey of the Drugged Kinome	30362749	Kinase	NA	SB 216763	Clc1c(C2=C(c3c4c(n(C)c3)cccc4)C(=O)NC2=O)ccc(Cl)c1	5.6	-3.41	2.2	literature	Clc1c(C2=C(c3c4c(n(C)c3)cccc4)C(=O)NC2=O)ccc(Cl)c1	5.077	51.1	371.223	51.1	0
CDK2	CDK2_30362749	Fluorescent ligand-binding assay	J Am Chem Soc.	Binding Kinetics Survey of the Drugged Kinome	30362749	Kinase	NA	SNS-032 (BMS-387032)	S(Cc1oc(C(C)(C)C)cn1)c1sc(NC(=O)C2CCNCC2)nc1	6.93	-4.93	2.01	literature	S(Cc1oc(C(C)(C)C)cn1)c1sc(NC(=O)C2CCNCC2)nc1	1.939	80.05	380.537	80.05	1
CDK2	CDK2_30362749	Fluorescent ligand-binding assay	J Am Chem Soc.	Binding Kinetics Survey of the Drugged Kinome	30362749	Kinase	NA	SNS-314	Clc1cc(NC(=O)Nc2sc(CCNc3ncnc4c3scc4)cn2)ccc1	5.48	-2.63	2.85	literature	Clc1cc(NC(=O)Nc2sc(CCNc3ncnc4c3scc4)cn2)ccc1	2.83	91.83	430.944	91.83
CDK2	CDK2_30362749	Fluorescent ligand-binding assay	J Am Chem Soc.	Binding Kinetics Survey of the Drugged Kinome	30362749	Kinase	NA	SP600125	O=C1c2c3c([nH]nc3-c3c1cccc3)ccc2	5.57	-3.37	2.2	literature	O=C1c2c3c([nH]nc3-c3c1cccc3)ccc2	3.233	45.75	220.231	45.75	0
CDK2	CDK2_30362749	Fluorescent ligand-binding assay	J Am Chem Soc.	Binding Kinetics Survey of the Drugged Kinome	30362749	Kinase	NA	Saracatinib (AZD0530)	Clc1c(Nc2ncnc3c2c(OC2CCOCC2)cc(OCCN2CCN(C)CC2)c3)c2OCOc2cc1	5.51	-3.12	2.47	literature	Clc1c(Nc2ncnc3c2c(OC2CCOCC2)cc(OCCN2CCN(C)CC2)c3)c2OCOc2cc1	2.962	90.44	542.036	90.44	3
CDK2	CDK2_30362749	Fluorescent ligand-binding assay	J Am Chem Soc.	Binding Kinetics Survey of the Drugged Kinome	30362749	Kinase	NA	Sotrastaurin (AEB071)	O=C1C(c2nc(N3CCN(C)CC3)nc3c2cccc3)=C(c2c3c([nH]c2)cccc3)C(=O)N1	5.61	-3.34	2.27	literature	O=C1C(c2nc(N3CCN(C)CC3)nc3c2cccc3)=C(c2c3c([nH]c2)cccc3)C(=O)N1	2.127	94.22	438.491	94.22	2
CDK2	CDK2_30362749	Fluorescent ligand-binding assay	J Am Chem Soc.	Binding Kinetics Survey of the Drugged Kinome	30362749	Kinase	NA	Staurosporine	O(C)[C@@H]1[C@H](NC)C[C@H]2O[C@]1(C)n1c3c4n2c2c(c4c4C(=O)NCc4c3c3c1cccc3)cccc2	8.28	-5.91	2.38	literature	O(C)[C@@H]1[C@H](NC)C[C@H]2O[C@]1(C)n1c3c4n2c2c(c4c4C(=O)NCc4c3c3c1cccc3)cccc2	6.35953	69.45	466.541	69.45	0
CDK2	CDK2_30362749	Fluorescent ligand-binding assay	J Am Chem Soc.	Binding Kinetics Survey of the Drugged Kinome	30362749	Kinase	NA	TAE684 (NVP-TAE684)	Clc1c(Nc2c(S(=O)(=O)C(C)C)cccc2)nc(Nc2c(OC)cc(N3CCC(N4CCN(C)CC4)CC3)cc2)nc1	5.9	-3.94	1.98	literature	Clc1c(Nc2c(S(=O)(=O)C(C)C)cccc2)nc(Nc2c(OC)cc(N3CCC(N4CCN(C)CC4)CC3)cc2)nc1	3.959	102.93	614.215	102.93	0
CDK2	CDK2_30362749	Fluorescent ligand-binding assay	J Am Chem Soc.	Binding Kinetics Survey of the Drugged Kinome	30362749	Kinase	NA	TAK-901	S(=O)(=O)(CC)c1cc(-c2c3c(c(C)c(C(=O)NC4CCN(C)CC4)c2)[nH]c2ncc(C)cc32)ccc1	5.76	-3.59	2.16	literature	S(=O)(=O)(CC)c1cc(-c2c3c(c(C)c(C(=O)NC4CCN(C)CC4)c2)[nH]c2ncc(C)cc32)ccc1	4.722	95.16	504.655	95.16	1
CDK2	CDK2_30362749	Fluorescent ligand-binding assay	J Am Chem Soc.	Binding Kinetics Survey of the Drugged Kinome	30362749	Kinase	NA	TG101209	S(=O)(=O)(NC(C)(C)C)c1cc(Nc2c(C)cnc(Nc3ccc(N4CCN(C)CC4)cc3)n2)ccc1	5.63	-3.22	2.4	literature	S(=O)(=O)(NC(C)(C)C)c1cc(Nc2c(C)cnc(Nc3ccc(N4CCN(C)CC4)cc3)n2)ccc1	3.143	102.49	509.679	102.49	0
CDK2	CDK2_30362749	Fluorescent ligand-binding assay	J Am Chem Soc.	Binding Kinetics Survey of the Drugged Kinome	30362749	Kinase	NA	TPCA-1	Fc1ccc(-c2sc(NC(=O)N)c(C(=O)N)c2)cc1	5.64	-3.53	2.11	literature	Fc1ccc(-c2sc(NC(=O)N)c(C(=O)N)c2)cc1	1.318	98.21	279.295	98.21	0
CDK2	CDK2_30362749	Fluorescent ligand-binding assay	J Am Chem Soc.	Binding Kinetics Survey of the Drugged Kinome	30362749	Kinase	NA	Thiazovivin	O=C(NCc1ccccc1)c1nc(Nc2ncncc2)sc1	5.53	-3.08	2.45	literature	O=C(NCc1ccccc1)c1nc(Nc2ncncc2)sc1	1.345	79.8	311.369	79.8	0
CDK2	CDK2_30362749	Fluorescent ligand-binding assay	J Am Chem Soc.	Binding Kinetics Survey of the Drugged Kinome	30362749	Kinase	NA	Tyrphostin AG 879 (AG 879)	S=C(N)/C(/C#N)=C/c1cc(C(C)(C)C)c(O)c(C(C)(C)C)c1	5.26	-2.63	2.51	literature	S=C(N)/C(/C#N)=C/c1cc(C(C)(C)C)c(O)c(C(C)(C)C)c1	3.885	102.13	316.469	70.04	0
CDK2	CDK2_30362749	Fluorescent ligand-binding assay	J Am Chem Soc.	Binding Kinetics Survey of the Drugged Kinome	30362749	Kinase	NA	VX-680 (MK-0457 - Tozasertib)	S(c1nc(Nc2n[nH]c(C)c2)cc(N2CCN(C)CC2)n1)c1ccc(NC(=O)C2CC2)cc1	5.34	-2.72	2.94	literature	S(c1nc(Nc2n[nH]c(C)c2)cc(N2CCN(C)CC2)n1)c1ccc(NC(=O)C2CC2)cc1	2.586	102.07	464.598	102.07	2
CDK2	CDK2_30362749	Fluorescent ligand-binding assay	J Am Chem Soc.	Binding Kinetics Survey of the Drugged Kinome	30362749	Kinase	NA	WZ3146	Clc1c(Oc2cc(NC(=O)C=C)ccc2)nc(Nc2ccc(N3CCN(C)CC3)cc2)nc1	5.54	-3.11	2.42	literature	Clc1c(Oc2cc(NC(=O)C=C)ccc2)nc(Nc2ccc(N3CCN(C)CC3)cc2)nc1	3.187	82.62	464.957	82.62	0
CDK2	CDK2_30362749	Fluorescent ligand-binding assay	J Am Chem Soc.	Binding Kinetics Survey of the Drugged Kinome	30362749	Kinase	NA	XL765	O=C1N(CC)c2nc(N)nc(C)c2C=C1c1[nH]ncc1	5.77	-2.89	2.86	literature	O=C1N(CC)c2nc(N)nc(C)c2C=C1c1[nH]ncc1	0.15	100.79	270.296	102.48
CDK9	CDK9_30362749	Fluorescent ligand-binding assay	J Am Chem Soc.	Binding Kinetics Survey of the Drugged Kinome	30362749	Kinase	NA	A-674563	O(C[C@@H](N)Cc1ccccc1)c1cc(-c2cc3c(C)n[nH]c3cc2)cnc1	7.41	-5.58	1.84	literature	O(C[C@@H](N)Cc1ccccc1)c1cc(-c2cc3c(C)n[nH]c3cc2)cnc1	3.865	76.82	358.445	76.82	0
CDK9	CDK9_30362749	Fluorescent ligand-binding assay	J Am Chem Soc.	Binding Kinetics Survey of the Drugged Kinome	30362749	Kinase	NA	AEE788 (NVP-AEE788)	N([C@H](C)c1ccccc1)c1ncnc2[nH]c(-c3ccc(CN4CCN(CC)CC4)cc3)cc12	5.89	-4.54	1.4	literature	N([C@H](C)c1ccccc1)c1ncnc2[nH]c(-c3ccc(CN4CCN(CC)CC4)cc3)cc12	4.119	60.08	440.595	60.08	0
CDK9	CDK9_30362749	Fluorescent ligand-binding assay	J Am Chem Soc.	Binding Kinetics Survey of the Drugged Kinome	30362749	Kinase	NA	AS-252424	Fc1cc(O)c(-c2oc(/C=C\3/C(=O)NC(=O)S/3)cc2)cc1	5.03	-3.34	1.9	literature	Fc1cc(O)c(-c2oc(/C=C\3/C(=O)NC(=O)S/3)cc2)cc1	2.947	79.54	305.285	79.54	0
CDK9	CDK9_30362749	Fluorescent ligand-binding assay	J Am Chem Soc.	Binding Kinetics Survey of the Drugged Kinome	30362749	Kinase	NA	AS-605240	O=C1/C(=C\c2cc3nccnc3cc2)/SC(=O)N1	6.12	-4.52	1.51	literature	O=C1/C(=C\c2cc3nccnc3cc2)/SC(=O)N1	1.92753	71.95	257.273	71.95	0
CDK9	CDK9_30362749	Fluorescent ligand-binding assay	J Am Chem Soc.	Binding Kinetics Survey of the Drugged Kinome	30362749	Kinase	NA	AST-1306	Clc1c(OCc2cc(F)ccc2)ccc(Nc2ncnc3c2cc(NC(=O)C=C)cc3)c1	4.97	-2.99	2.9	literature	Clc1c(OCc2cc(F)ccc2)ccc(Nc2ncnc3c2cc(NC(=O)C=C)cc3)c1	5.174	76.14	448.885	76.14	0
CDK9	CDK9_30362749	Fluorescent ligand-binding assay	J Am Chem Soc.	Binding Kinetics Survey of the Drugged Kinome	30362749	Kinase	NA	AT7519	Clc1c(C(=O)Nc2c(C(=O)NC3CCNCC3)n[nH]c2)c(Cl)ccc1	8.91	-6.14	2.5	literature	Clc1c(C(=O)Nc2c(C(=O)NC3CCNCC3)n[nH]c2)c(Cl)ccc1	1.989	98.91	382.251	98.91	2
CDK9	CDK9_30362749	Fluorescent ligand-binding assay	J Am Chem Soc.	Binding Kinetics Survey of the Drugged Kinome	30362749	Kinase	NA	AT9283	O=C(Nc1c(-c2[nH]c3c(n2)cc(CN2CCOCC2)cc3)n[nH]c1)NC1CC1	6.96	-4.95	1.7	literature	O=C(Nc1c(-c2[nH]c3c(n2)cc(CN2CCOCC2)cc3)n[nH]c1)NC1CC1	1.13706	110.96	381.44	110.96
CDK9	CDK9_30362749	Fluorescent ligand-binding assay	J Am Chem Soc.	Binding Kinetics Survey of the Drugged Kinome	30362749	Kinase	NA	AZ 960	Fc1c(Nc2n[nH]c(C)c2)nc(N[C@@H](C)c2ccc(F)cc2)c(C#N)c1	6.18	-4.5	1.68	literature	Fc1c(Nc2n[nH]c(C)c2)nc(N[C@@H](C)c2ccc(F)cc2)c(C#N)c1	3.894	89.42	354.364	89.42	0
CDK9	CDK9_30362749	Fluorescent ligand-binding assay	J Am Chem Soc.	Binding Kinetics Survey of the Drugged Kinome	30362749	Kinase	NA	AZD4547	O=C(Nc1n[nH]c(CCc2cc(OC)cc(OC)c2)c1)c1ccc(N2C[C@@H](C)N[C@@H](C)C2)cc1	5.62	-2.75	2.73	literature	O=C(Nc1n[nH]c(CCc2cc(OC)cc(OC)c2)c1)c1ccc(N2C[C@@H](C)N[C@@H](C)C2)cc1	3.948	91.51	463.582	91.51	2
CDK9	CDK9_30362749	Fluorescent ligand-binding assay	J Am Chem Soc.	Binding Kinetics Survey of the Drugged Kinome	30362749	Kinase	NA	AZD5438	S(=O)(=O)(C)c1ccc(Nc2nc(-c3n(C(C)C)c(C)nc3)ccn2)cc1	7.48	-5.77	1.71	literature	S(=O)(=O)(C)c1ccc(Nc2nc(-c3n(C(C)C)c(C)nc3)ccn2)cc1	1.81453	89.77	371.465	89.77	0
CDK9	CDK9_30362749	Fluorescent ligand-binding assay	J Am Chem Soc.	Binding Kinetics Survey of the Drugged Kinome	30362749	Kinase	NA	BMS-265246	Fc1c(C(=O)c2c(OCCCC)c3c([nH]nc3)nc2)c(F)cc(C)c1	7.66	-6.06	1.65	literature	Fc1c(C(=O)c2c(OCCCC)c3c([nH]nc3)nc2)c(F)cc(C)c1	4.48253	67.87	345.349	67.87
CDK9	CDK9_30362749	Fluorescent ligand-binding assay	J Am Chem Soc.	Binding Kinetics Survey of the Drugged Kinome	30362749	Kinase	NA	BS-181 HCl	N(CCCCCCN)C1=Nc2c(C(C)C)cnn2C(NCc2ccccc2)=C1	6.18	-4.56	1.63	literature	N(CCCCCCN)C1=Nc2c(C(C)C)cnn2C(NCc2ccccc2)=C1	3.834	80.26	380.54	80.27	0
CDK9	CDK9_30362749	Fluorescent ligand-binding assay	J Am Chem Soc.	Binding Kinetics Survey of the Drugged Kinome	30362749	Kinase	NA	BX-795	Ic1c(NCCCNC(=O)c2sccc2)nc(Nc2cc(NC(=O)N3CCCC3)ccc2)nc1	6.8	-4.99	1.81	literature	Ic1c(NCCCNC(=O)c2sccc2)nc(Nc2cc(NC(=O)N3CCCC3)ccc2)nc1	3.106	111.28	591.478	111.28	0
CDK9	CDK9_30362749	Fluorescent ligand-binding assay	J Am Chem Soc.	Binding Kinetics Survey of the Drugged Kinome	30362749	Kinase	NA	BX-912	Brc1c(NCCc2[nH]cnc2)nc(Nc2cc(NC(=O)N3CCCC3)ccc2)nc1	6.08	-4.6	1.49	literature	Brc1c(NCCc2[nH]cnc2)nc(Nc2cc(NC(=O)N3CCCC3)ccc2)nc1	1.234	110.86	471.363	110.86	0
CDK9	CDK9_30362749	Fluorescent ligand-binding assay	J Am Chem Soc.	Binding Kinetics Survey of the Drugged Kinome	30362749	Kinase	NA	CCT129202	Clc1c(N2CCN(CC(=O)Nc3sccn3)CC2)c2[nH]c(-c3ccc(N(C)C)cc3)nc2nc1	5.76	-3.68	2.27	literature	Clc1c(N2CCN(CC(=O)Nc3sccn3)CC2)c2[nH]c(-c3ccc(N(C)C)cc3)nc2nc1	1.99653	93.28	497.027	93.28
CDK9	CDK9_30362749	Fluorescent ligand-binding assay	J Am Chem Soc.	Binding Kinetics Survey of the Drugged Kinome	30362749	Kinase	NA	CCT137690	Brc1c(N2CCN(Cc3noc(C)c3)CC2)c2[nH]c(-c3ccc(N4CCN(C)CC4)cc3)nc2nc1	5.76	-4.47	1.39	literature	Brc1c(N2CCN(Cc3noc(C)c3)CC2)c2[nH]c(-c3ccc(N4CCN(C)CC4)cc3)nc2nc1	2.25753	80.56	551.493	80.56	0
CDK9	CDK9_30362749	Fluorescent ligand-binding assay	J Am Chem Soc.	Binding Kinetics Survey of the Drugged Kinome	30362749	Kinase	NA	CEP33779	S(=O)(=O)(C)c1ccc(C=2c3n(nc(Nc4cc(N5CCN(C)CC5)ccc4)n3)C=CC=2)cc1	5.73	-3.26	2.1	literature	S(=O)(=O)(C)c1ccc(C=2c3n(nc(Nc4cc(N5CCN(C)CC5)ccc4)n3)C=CC=2)cc1	1.624	83.36	462.578	82.84	0
CDK9	CDK9_30362749	Fluorescent ligand-binding assay	J Am Chem Soc.	Binding Kinetics Survey of the Drugged Kinome	30362749	Kinase	NA	CHIR-124	Clc1cc2C(N[C@H]3C4CCN(C3)CC4)=C(c3[nH]c4c(n3)cccc4)C(=O)Nc2cc1	7.54	-5.42	2.01	literature	Clc1cc2C(N[C@H]3C4CCN(C3)CC4)=C(c3[nH]c4c(n3)cccc4)C(=O)Nc2cc1	3.375	73.05	419.916	76.81	0
CDK9	CDK9_30362749	Fluorescent ligand-binding assay	J Am Chem Soc.	Binding Kinetics Survey of the Drugged Kinome	30362749	Kinase	NA	CHIR-98014	Clc1c(-c2c(-n3cncc3)cnc(NCCNc3nc(N)c([N+](=O)[O-])cc3)n2)ccc(Cl)c1	6.97	-4.95	2.01	literature	Clc1c(-c2c(-n3cncc3)cnc(NCCNc3nc(N)c([N+](=O)[O-])cc3)n2)ccc(Cl)c1	2.95406	152.39	486.323	149.71	0
CDK9	CDK9_30362749	Fluorescent ligand-binding assay	J Am Chem Soc.	Binding Kinetics Survey of the Drugged Kinome	30362749	Kinase	NA	CP 673451	O(CCOc1cc2ncn(-c3nc4c(N5CCC(N)CC5)cccc4cc3)c2cc1)C	7.15	-5.4	1.75	literature	O(CCOc1cc2ncn(-c3nc4c(N5CCC(N)CC5)cccc4cc3)c2cc1)C	3.25174	78.43	417.513	78.43	0
CDK9	CDK9_30362749	Fluorescent ligand-binding assay	J Am Chem Soc.	Binding Kinetics Survey of the Drugged Kinome	30362749	Kinase	NA	CX-4945 (Silmitasertib)	Clc1cc(Nc2nc3c(c4c2ccnc4)ccc(C(=O)O)c3)ccc1	6.43	-4.66	1.78	literature	Clc1cc(Nc2nc3c(c4c2ccnc4)ccc(C(=O)O)c3)ccc1	4.223	75.11	349.777	75.11	2
CDK9	CDK9_30362749	Fluorescent ligand-binding assay	J Am Chem Soc.	Binding Kinetics Survey of the Drugged Kinome	30362749	Kinase	NA	CYC116	N(c1nc(-c2c(C)nc(N)s2)ccn1)c1ccc(N2CCOCC2)cc1	6.76	-4.95	1.81	literature	N(c1nc(-c2c(C)nc(N)s2)ccn1)c1ccc(N2CCOCC2)cc1	1.126	89.19	368.465	89.19	1
CDK9	CDK9_30362749	Fluorescent ligand-binding assay	J Am Chem Soc.	Binding Kinetics Survey of the Drugged Kinome	30362749	Kinase	NA	Crenolanib (CP-868596)	O(CC1(C)COC1)c1cc2ncn(-c3nc4c(N5CCC(N)CC5)cccc4cc3)c2cc1	7.26	-5.26	2.01	literature	O(CC1(C)COC1)c1cc2ncn(-c3nc4c(N5CCC(N)CC5)cccc4cc3)c2cc1	3.834	78.43	443.551	78.43	3
CDK9	CDK9_30362749	Fluorescent ligand-binding assay	J Am Chem Soc.	Binding Kinetics Survey of the Drugged Kinome	30362749	Kinase	NA	Crizotinib (PF-02341066)	Clc1c([C@H](Oc2c(N)ncc(-c3cn(C4CCNCC4)nc3)c2)C)c(Cl)ccc1F	4.95	-2.66	2.32	literature	Clc1c([C@H](Oc2c(N)ncc(-c3cn(C4CCNCC4)nc3)c2)C)c(Cl)ccc1F	4.175	77.99	450.345	77.99	0
CDK9	CDK9_30362749	Fluorescent ligand-binding assay	J Am Chem Soc.	Binding Kinetics Survey of the Drugged Kinome	30362749	Kinase	NA	Cyt387	O=C(NCC#N)c1ccc(-c2nc(Nc3ccc(N4CCOCC4)cc3)ncc2)cc1	7.07	-5.26	1.82	literature	O=C(NCC#N)c1ccc(-c2nc(Nc3ccc(N4CCOCC4)cc3)ncc2)cc1	1.468	103.17	414.469	103.17	3
CDK9	CDK9_30362749	Fluorescent ligand-binding assay	J Am Chem Soc.	Binding Kinetics Survey of the Drugged Kinome	30362749	Kinase	NA	Dinaciclib (SCH727965)	OCC[C@H]1N(C2=Nc3c(CC)cnn3C(NCc3c[n+]([O-])ccc3)=C2)CCCC1	8.91	-6	2.91	literature	OCC[C@H]1N(C2=Nc3c(CC)cnn3C(NCc3c[n+]([O-])ccc3)=C2)CCCC1	2.707	91.14	396.495	92.63	3
CDK9	CDK9_30362749	Fluorescent ligand-binding assay	J Am Chem Soc.	Binding Kinetics Survey of the Drugged Kinome	30362749	Kinase	NA	Enzastaurin (LY317615)	O=C1C(c2c3c(n(C)c2)cccc3)=C(c2c3c(n(C4CCN(Cc5ncccc5)CC4)c2)cccc3)C(=O)N1	5.72	-4.13	1.64	literature	O=C1C(c2c3c(n(C)c2)cccc3)=C(c2c3c(n(C4CCN(Cc5ncccc5)CC4)c2)cccc3)C(=O)N1	5.661	72.16	515.617	72.16	3
CDK9	CDK9_30362749	Fluorescent ligand-binding assay	J Am Chem Soc.	Binding Kinetics Survey of the Drugged Kinome	30362749	Kinase	NA	Flavopiridol HCl	Clc1c(C=2Oc3c([C@@H]4[C@H](O)CN(C)CC4)c(O)cc(O)c3C(=O)C=2)cccc1	8.75	-6.24	2.55	literature	Clc1c(C=2Oc3c([C@@H]4[C@H](O)CN(C)CC4)c(O)cc(O)c3C(=O)C=2)cccc1	2.902	90.23	401.846	94.14	0
CDK9	CDK9_30362749	Fluorescent ligand-binding assay	J Am Chem Soc.	Binding Kinetics Survey of the Drugged Kinome	30362749	Kinase	NA	GDC-0941	S(=O)(=O)(C)N1CCN(Cc2sc3c(N4CCOCC4)nc(-c4c5c([nH]nc5)ccc4)nc3c2)CC1	5.39	-4.05	1.43	literature	S(=O)(=O)(C)N1CCN(Cc2sc3c(N4CCOCC4)nc(-c4c5c([nH]nc5)ccc4)nc3c2)CC1	0.888	107.55	513.647	107.55	0
CDK9	CDK9_30362749	Fluorescent ligand-binding assay	J Am Chem Soc.	Binding Kinetics Survey of the Drugged Kinome	30362749	Kinase	NA	GSK1059615	O=C1/C(=C/c2cc3c(-c4ccncc4)ccnc3cc2)/SC(=O)N1	6.66	-5.73	0.94	literature	O=C1/C(=C/c2cc3c(-c4ccncc4)ccnc3cc2)/SC(=O)N1	3.478	71.95	333.371	71.95	1
CDK9	CDK9_30362749	Fluorescent ligand-binding assay	J Am Chem Soc.	Binding Kinetics Survey of the Drugged Kinome	30362749	Kinase	NA	Hesperadin	S(=O)(=O)(Nc1cc2/C(=C(/Nc3ccc(CN4CCCCC4)cc3)\c3ccccc3)/C(=O)Nc2cc1)CC	6.15	-4.32	1.83	literature	S(=O)(=O)(Nc1cc2/C(=C(/Nc3ccc(CN4CCCCC4)cc3)\c3ccccc3)/C(=O)Nc2cc1)CC	5.433	90.54	516.666	90.54	0
CDK9	CDK9_30362749	Fluorescent ligand-binding assay	J Am Chem Soc.	Binding Kinetics Survey of the Drugged Kinome	30362749	Kinase	NA	JNJ-7706621	S(=O)(=O)(N)c1ccc(Nc2nn(C(=O)c3c(F)cccc3F)c(N)n2)cc1	7.82	-6.03	1.8	literature	S(=O)(=O)(N)c1ccc(Nc2nn(C(=O)c3c(F)cccc3F)c(N)n2)cc1	0.89	145.99	394.362	145.99	0
CDK9	CDK9_30362749	Fluorescent ligand-binding assay	J Am Chem Soc.	Binding Kinetics Survey of the Drugged Kinome	30362749	Kinase	NA	KW 2449	O=C(N1CCNCC1)c1ccc(/C=C/c2n[nH]c3c2cccc3)cc1	5.31	-2.81	2.17	literature	O=C(N1CCNCC1)c1ccc(/C=C/c2n[nH]c3c2cccc3)cc1	3.087	61.02	332.407	61.02	0
CDK9	CDK9_30362749	Fluorescent ligand-binding assay	J Am Chem Soc.	Binding Kinetics Survey of the Drugged Kinome	30362749	Kinase	NA	LY2784544	Clc1cc(F)c(Cc2c(C)nc3C(CN4CCOCC4)=CC(Nc4n[nH]c(C)c4)=Nn23)cc1	6.44	-4.45	1.98	literature	Clc1cc(F)c(Cc2c(C)nc3C(CN4CCOCC4)=CC(Nc4n[nH]c(C)c4)=Nn23)cc1	3.368	83.36	469.952	83.37	2
CDK9	CDK9_30362749	Fluorescent ligand-binding assay	J Am Chem Soc.	Binding Kinetics Survey of the Drugged Kinome	30362749	Kinase	NA	Milciclib (PHA-848125)	O=C(NC)c1nn(C)c-2c1C(C)(C)Cc1c-2nc(Nc2ccc(N3CCN(C)CC3)cc2)nc1	6	-4.18	1.84	literature	O=C(NC)c1nn(C)c-2c1C(C)(C)Cc1c-2nc(Nc2ccc(N3CCN(C)CC3)cc2)nc1	0.92053	91.21	460.586	91.21	1
CDK9	CDK9_30362749	Fluorescent ligand-binding assay	J Am Chem Soc.	Binding Kinetics Survey of the Drugged Kinome	30362749	Kinase	NA	PD 0332991 (Palbociclib) HCl	O=C(C)C=1C(=O)N(C2CCCC2)c2nc(Nc3ncc(N4CCNCC4)cc3)ncc2C=1C	6.42	-4.76	1.66	literature	O=C(C)C=1C(=O)N(C2CCCC2)c2nc(Nc3ncc(N4CCNCC4)cc3)ncc2C=1C	1.161	103.35	447.543	105.04	0
CDK9	CDK9_30362749	Fluorescent ligand-binding assay	J Am Chem Soc.	Binding Kinetics Survey of the Drugged Kinome	30362749	Kinase	NA	PF-00562271	S(=O)(=O)(N(C)c1c(CNc2c(C(F)(F)F)cnc(Nc3cc4c(NC(=O)C4)cc3)n2)cccn1)C	7.27	-5.37	1.93	literature	S(=O)(=O)(N(C)c1c(CNc2c(C(F)(F)F)cnc(Nc3cc4c(NC(=O)C4)cc3)n2)cccn1)C	1.07576	129.21	507.497	129.21	0
CDK9	CDK9_30362749	Fluorescent ligand-binding assay	J Am Chem Soc.	Binding Kinetics Survey of the Drugged Kinome	30362749	Kinase	NA	PF-03814735	FC(F)(F)c1c(NC2CCC2)nc(Nc2cc3[C@@H]4N(C(=O)CNC(=O)C)[C@H](c3cc2)CC4)nc1	6.28	-4.59	1.69	literature	FC(F)(F)c1c(NC2CCC2)nc(Nc2cc3[C@@H]4N(C(=O)CNC(=O)C)[C@H](c3cc2)CC4)nc1	2.73576	99.25	474.487	99.25	0
CDK9	CDK9_30362749	Fluorescent ligand-binding assay	J Am Chem Soc.	Binding Kinetics Survey of the Drugged Kinome	30362749	Kinase	NA	PHA-665752	Clc1c(CS(=O)(=O)c2cc3/C(=C/c4c(C)c(C(=O)N5[C@@H](CN6CCCC6)CCC5)c(C)[nH]4)/C(=O)Nc3cc2)c(Cl)ccc1	6	-4.59	1.45	literature	Clc1c(CS(=O)(=O)c2cc3/C(=C/c4c(C)c(C(=O)N5[C@@H](CN6CCCC6)CCC5)c(C)[nH]4)/C(=O)Nc3cc2)c(Cl)ccc1	5.282	102.58	641.62	102.58	0
CDK9	CDK9_30362749	Fluorescent ligand-binding assay	J Am Chem Soc.	Binding Kinetics Survey of the Drugged Kinome	30362749	Kinase	NA	PHA-767491	O=C1NCCc2[nH]c(-c3ccncc3)cc12	8.09	-6.33	1.77	literature	O=C1NCCc2[nH]c(-c3ccncc3)cc12	0.568	57.78	213.24	57.78	0
CDK9	CDK9_30362749	Fluorescent ligand-binding assay	J Am Chem Soc.	Binding Kinetics Survey of the Drugged Kinome	30362749	Kinase	NA	PHA-793887	O=C(Nc1n[nH]c2C(C)(C)N(C(=O)C3CCN(C)CC3)Cc12)CC(C)C	7.31	-5.08	2.22	literature	O=C(Nc1n[nH]c2C(C)(C)N(C(=O)C3CCN(C)CC3)Cc12)CC(C)C	1.804	81.33	361.49	81.33	1
CDK9	CDK9_30362749	Fluorescent ligand-binding assay	J Am Chem Soc.	Binding Kinetics Survey of the Drugged Kinome	30362749	Kinase	NA	PP-121	Nc1ncnc2n(C3CCCC3)nc(-c3cnc4[nH]ccc4c3)c12	5.42	-3.36	2.1	literature	Nc1ncnc2n(C3CCCC3)nc(-c3cnc4[nH]ccc4c3)c12	1.75553	98.3	319.372	98.3	0
CDK9	CDK9_30362749	Fluorescent ligand-binding assay	J Am Chem Soc.	Binding Kinetics Survey of the Drugged Kinome	30362749	Kinase	NA	Pazopanib HCl	S(=O)(=O)(N)c1c(C)ccc(Nc2nc(N(C)c3cc4nn(C)c(C)c4cc3)ccn2)c1	6.04	-4.54	1.34	literature	S(=O)(=O)(N)c1c(C)ccc(Nc2nc(N(C)c3cc4nn(C)c(C)c4cc3)ccn2)c1	1.865	119.03	437.528	119.03	4
CDK9	CDK9_30362749	Fluorescent ligand-binding assay	J Am Chem Soc.	Binding Kinetics Survey of the Drugged Kinome	30362749	Kinase	NA	Pelitinib (EKB-569)	Clc1c(F)ccc(Nc2c(C#N)cnc3c2cc(NC(=O)/C=C/CN(C)C)c(OCC)c3)c1	5.76	-3.34	2.41	literature	Clc1c(F)ccc(Nc2c(C#N)cnc3c2cc(NC(=O)/C=C/CN(C)C)c(OCC)c3)c1	3.98	90.28	467.932	90.28	0
CDK9	CDK9_30362749	Fluorescent ligand-binding assay	J Am Chem Soc.	Binding Kinetics Survey of the Drugged Kinome	30362749	Kinase	NA	Piceatannol	Oc1c(O)ccc(/C=C/c2cc(O)cc(O)c2)c1	5.62	-4.42	2.39	literature	Oc1c(O)ccc(/C=C/c2cc(O)cc(O)c2)c1	3.424	80.92	244.246	80.92	0
CDK9	CDK9_30362749	Fluorescent ligand-binding assay	J Am Chem Soc.	Binding Kinetics Survey of the Drugged Kinome	30362749	Kinase	NA	Quercetin (Sophoretin)	O=C1C(O)=C(c2cc(O)c(O)cc2)Oc2c1c(O)cc(O)c2	6.09	-3.8	2.44	literature	O=C1C(O)=C(c2cc(O)c(O)cc2)Oc2c1c(O)cc(O)c2	2.032	127.45	302.238	131.36	0
CDK9	CDK9_30362749	Fluorescent ligand-binding assay	J Am Chem Soc.	Binding Kinetics Survey of the Drugged Kinome	30362749	Kinase	NA	Roscovitine (Seliciclib - CYC202)	OC[C@H](Nc1nc(NCc2ccccc2)c2ncn(C(C)C)c2n1)CC	6.53	-4.95	1.61	literature	OC[C@H](Nc1nc(NCc2ccccc2)c2ncn(C(C)C)c2n1)CC	2.94206	87.89	354.458	87.89	0
CDK9	CDK9_30362749	Fluorescent ligand-binding assay	J Am Chem Soc.	Binding Kinetics Survey of the Drugged Kinome	30362749	Kinase	NA	SB 415286	Clc1c(O)ccc(NC2=C(c3c([N+](=O)[O-])cccc3)C(=O)NC2=O)c1	5.91	-3.11	2.81	literature	Clc1c(O)ccc(NC2=C(c3c([N+](=O)[O-])cccc3)C(=O)NC2=O)c1	3.044	124.25	359.725	121.57	0
CDK9	CDK9_30362749	Fluorescent ligand-binding assay	J Am Chem Soc.	Binding Kinetics Survey of the Drugged Kinome	30362749	Kinase	NA	SB590885	O(CCN(C)C)c1ccc(-c2[nH]c(c(-c3cc4c(/C(=N/O)/CC4)cc3)n2)-c2ccncc2)cc1	4.92	-2.73	2.15	literature	O(CCN(C)C)c1ccc(-c2[nH]c(c(-c3cc4c(/C(=N/O)/CC4)cc3)n2)-c2ccncc2)cc1	3.916	86.63	453.546	86.63	0
CDK9	CDK9_30362749	Fluorescent ligand-binding assay	J Am Chem Soc.	Binding Kinetics Survey of the Drugged Kinome	30362749	Kinase	NA	SNS-032 (BMS-387032)	S(Cc1oc(C(C)(C)C)cn1)c1sc(NC(=O)C2CCNCC2)nc1	8.33	-6.13	2.2	literature	S(Cc1oc(C(C)(C)C)cn1)c1sc(NC(=O)C2CCNCC2)nc1	1.939	80.05	380.537	80.05	1
CDK9	CDK9_30362749	Fluorescent ligand-binding assay	J Am Chem Soc.	Binding Kinetics Survey of the Drugged Kinome	30362749	Kinase	NA	Sotrastaurin (AEB071)	O=C1C(c2nc(N3CCN(C)CC3)nc3c2cccc3)=C(c2c3c([nH]c2)cccc3)C(=O)N1	5.09	-3.54	1.95	literature	O=C1C(c2nc(N3CCN(C)CC3)nc3c2cccc3)=C(c2c3c([nH]c2)cccc3)C(=O)N1	2.127	94.22	438.491	94.22	2
CDK9	CDK9_30362749	Fluorescent ligand-binding assay	J Am Chem Soc.	Binding Kinetics Survey of the Drugged Kinome	30362749	Kinase	NA	Staurosporine	O(C)[C@@H]1[C@H](NC)C[C@H]2O[C@]1(C)n1c3c4n2c2c(c4c4C(=O)NCc4c3c3c1cccc3)cccc2	8.31	-6.05	2.26	literature	O(C)[C@@H]1[C@H](NC)C[C@H]2O[C@]1(C)n1c3c4n2c2c(c4c4C(=O)NCc4c3c3c1cccc3)cccc2	6.35953	69.45	466.541	69.45	0
CDK9	CDK9_30362749	Fluorescent ligand-binding assay	J Am Chem Soc.	Binding Kinetics Survey of the Drugged Kinome	30362749	Kinase	NA	Sunitinib Malate (Sutent)	Fc1cc2/C(=C/c3c(C)c(C(=O)NCCN(CC)CC)c(C)[nH]3)/C(=O)Nc2cc1.O=C(O)[C@@H](O)CC(=O)O	5.71	-4.41	1.04	literature	Fc1cc2/C(=C/c3c(C)c(C(=O)NCCN(CC)CC)c(C)[nH]3)/C(=O)Nc2cc1	2.569	77.23	398.482	77.23	0
CDK9	CDK9_30362749	Fluorescent ligand-binding assay	J Am Chem Soc.	Binding Kinetics Survey of the Drugged Kinome	30362749	Kinase	NA	TAK-901	S(=O)(=O)(CC)c1cc(-c2c3c(c(C)c(C(=O)NC4CCN(C)CC4)c2)[nH]c2ncc(C)cc32)ccc1	6.63	-4.72	1.91	literature	S(=O)(=O)(CC)c1cc(-c2c3c(c(C)c(C(=O)NC4CCN(C)CC4)c2)[nH]c2ncc(C)cc32)ccc1	4.722	95.16	504.655	95.16	1
CDK9	CDK9_30362749	Fluorescent ligand-binding assay	J Am Chem Soc.	Binding Kinetics Survey of the Drugged Kinome	30362749	Kinase	NA	TPCA-1	Fc1ccc(-c2sc(NC(=O)N)c(C(=O)N)c2)cc1	5.07	-2.64	2.5	literature	Fc1ccc(-c2sc(NC(=O)N)c(C(=O)N)c2)cc1	1.318	98.21	279.295	98.21	0
CDK9	CDK9_30362749	Fluorescent ligand-binding assay	J Am Chem Soc.	Binding Kinetics Survey of the Drugged Kinome	30362749	Kinase	NA	TWS119	O(c1ncnc2[nH]c(-c3cc(N)ccc3)cc12)c1cc(O)ccc1	6.4	-4.73	1.69	literature	O(c1ncnc2[nH]c(-c3cc(N)ccc3)cc12)c1cc(O)ccc1	3.011	97.05	318.336	97.05	0
CDK9	CDK9_30362749	Fluorescent ligand-binding assay	J Am Chem Soc.	Binding Kinetics Survey of the Drugged Kinome	30362749	Kinase	NA	Thiazovivin	O=C(NCc1ccccc1)c1nc(Nc2ncncc2)sc1	6.25	-4.5	1.78	literature	O=C(NCc1ccccc1)c1nc(Nc2ncncc2)sc1	1.345	79.8	311.369	79.8	0
CDK9	CDK9_30362749	Fluorescent ligand-binding assay	J Am Chem Soc.	Binding Kinetics Survey of the Drugged Kinome	30362749	Kinase	NA	WZ3146	Clc1c(Oc2cc(NC(=O)C=C)ccc2)nc(Nc2ccc(N3CCN(C)CC3)cc2)nc1	5.61	-3.99	1.63	literature	Clc1c(Oc2cc(NC(=O)C=C)ccc2)nc(Nc2ccc(N3CCN(C)CC3)cc2)nc1	3.187	82.62	464.957	82.62	0
CDK9	CDK9_30362749	Fluorescent ligand-binding assay	J Am Chem Soc.	Binding Kinetics Survey of the Drugged Kinome	30362749	Kinase	NA	WZ8040	Clc1c(Sc2cc(NC(=O)C=C)ccc2)nc(Nc2ccc(N3CCN(C)CC3)cc2)nc1	5.62	-3.5	1.82	literature	Clc1c(Sc2cc(NC(=O)C=C)ccc2)nc(Nc2ccc(N3CCN(C)CC3)cc2)nc1	3.823	73.39	481.024	73.39	0
EGFR	EGFR_30362749	Fluorescent ligand-binding assay	J Am Chem Soc.	Binding Kinetics Survey of the Drugged Kinome	30362749	Kinase	NA	A-769662	O=C1C(C#N)=C(O)c2c(-c3ccc(-c4c(O)cccc4)cc3)csc2N1	5.67	-3.79	2.01	literature	O=C1C(C#N)=C(O)c2c(-c3ccc(-c4c(O)cccc4)cc3)csc2N1	4.245	93.35	360.393	97.11	0
EGFR	EGFR_30362749	Fluorescent ligand-binding assay	J Am Chem Soc.	Binding Kinetics Survey of the Drugged Kinome	30362749	Kinase	NA	AEE788 (NVP-AEE788)	N([C@H](C)c1ccccc1)c1ncnc2[nH]c(-c3ccc(CN4CCN(CC)CC4)cc3)cc12	9.29	-7.35	1.94	literature	N([C@H](C)c1ccccc1)c1ncnc2[nH]c(-c3ccc(CN4CCN(CC)CC4)cc3)cc12	4.119	60.08	440.595	60.08	0
EGFR	EGFR_30362749	Fluorescent ligand-binding assay	J Am Chem Soc.	Binding Kinetics Survey of the Drugged Kinome	30362749	Kinase	NA	AG-490	O=C(NCc1ccccc1)/C(/C#N)=C/c1cc(O)c(O)cc1	5.31	-3.43	1.67	literature	O=C(NCc1ccccc1)/C(/C#N)=C/c1cc(O)c(O)cc1	2.462	93.35	294.31	93.35	0
EGFR	EGFR_30362749	Fluorescent ligand-binding assay	J Am Chem Soc.	Binding Kinetics Survey of the Drugged Kinome	30362749	Kinase	NA	ARRY334543	Clc1c(OCc2sccn2)ccc(Nc2ncnc3c2cc(NC=2OC[C@@H](C)N=2)cc3)c1	10.05	-7.36	2.69	literature	Clc1c(OCc2sccn2)ccc(Nc2ncnc3c2cc(NC=2OC[C@@H](C)N=2)cc3)c1	3.957	93.55	466.953	93.55	2
EGFR	EGFR_30362749	Fluorescent ligand-binding assay	J Am Chem Soc.	Binding Kinetics Survey of the Drugged Kinome	30362749	Kinase	NA	AS-252424	Fc1cc(O)c(-c2oc(/C=C\3/C(=O)NC(=O)S/3)cc2)cc1	5.99	-4.51	1.48	literature	Fc1cc(O)c(-c2oc(/C=C\3/C(=O)NC(=O)S/3)cc2)cc1	2.947	79.54	305.285	79.54	0
EGFR	EGFR_30362749	Fluorescent ligand-binding assay	J Am Chem Soc.	Binding Kinetics Survey of the Drugged Kinome	30362749	Kinase	NA	AT9283	O=C(Nc1c(-c2[nH]c3c(n2)cc(CN2CCOCC2)cc3)n[nH]c1)NC1CC1	6.38	-5.06	1.32	literature	O=C(Nc1c(-c2[nH]c3c(n2)cc(CN2CCOCC2)cc3)n[nH]c1)NC1CC1	1.13706	110.96	381.44	110.96
EGFR	EGFR_30362749	Fluorescent ligand-binding assay	J Am Chem Soc.	Binding Kinetics Survey of the Drugged Kinome	30362749	Kinase	NA	AZ628	O=C(Nc1cc(Nc2cc3C(=O)N(C)C=Nc3cc2)c(C)cc1)c1cc(C(C#N)(C)C)ccc1	6.01	-4.38	1.66	literature	O=C(Nc1cc(Nc2cc3C(=O)N(C)C=Nc3cc2)c(C)cc1)c1cc(C(C#N)(C)C)ccc1	4.957	97.59	451.53	99.81	0
EGFR	EGFR_30362749	Fluorescent ligand-binding assay	J Am Chem Soc.	Binding Kinetics Survey of the Drugged Kinome	30362749	Kinase	NA	AZD7762	Fc1cc(-c2sc(C(=O)N[C@@H]3CNCCC3)c(NC(=O)N)c2)ccc1	7.28	-5.84	1.45	literature	Fc1cc(-c2sc(C(=O)N[C@@H]3CNCCC3)c(NC(=O)N)c2)ccc1	1.64	96.25	362.429	96.25	0
EGFR	EGFR_30362749	Fluorescent ligand-binding assay	J Am Chem Soc.	Binding Kinetics Survey of the Drugged Kinome	30362749	Kinase	NA	Apatinib (YN968D1)	S(=O)(=O)([O-])C.O=C(Nc1ccc(C2(C#N)CCCC2)cc1)c1c([N+H2]c2c(C)ccnc2)nccc1	6.21	-4.35	1.87	literature	O=C(Nc1ccc(C2(C#N)CCCC2)cc1)c1c(Nc2c(C)ccnc2)nccc1	3.989	90.7	397.482	90.7
EGFR	EGFR_30362749	Fluorescent ligand-binding assay	J Am Chem Soc.	Binding Kinetics Survey of the Drugged Kinome	30362749	Kinase	NA	Arry-380	O(c1c(C)cc(Nc2ncnc3c2cc(NC=2OCC(C)(C)N=2)cc3)cc1)C1=Cc2n(ncn2)C=C1	7.17	-5.67	1.5	literature	O(c1c(C)cc(Nc2ncnc3c2cc(NC=2OCC(C)(C)N=2)cc3)cc1)C1=Cc2n(ncn2)C=C1	2.955	111.37	480.532	110.85	3
EGFR	EGFR_30362749	Fluorescent ligand-binding assay	J Am Chem Soc.	Binding Kinetics Survey of the Drugged Kinome	30362749	Kinase	NA	Aurora A Inhibitor I	Clc1c(NC(=O)c2ccc(Nc3c(F)cnc(Nc4ccc(CC(=O)N5CCN(CC)CC5)cc4)n3)cc2)cccc1	5.26	-4.03	1.49	literature	Clc1c(NC(=O)c2ccc(Nc3c(F)cnc(Nc4ccc(CC(=O)N5CCN(CC)CC5)cc4)n3)cc2)cccc1	4.209	102.49	588.087	102.49	0
EGFR	EGFR_30362749	Fluorescent ligand-binding assay	J Am Chem Soc.	Binding Kinetics Survey of the Drugged Kinome	30362749	Kinase	NA	BGJ398 (NVP-BGJ398)	Clc1c(NC(=O)N(C)c2ncnc(Nc3ccc(N4CCN(CC)CC4)cc3)c2)c(Cl)c(OC)cc1OC	5.31	-3.45	1.84	literature	Clc1c(NC(=O)N(C)c2ncnc(Nc3ccc(N4CCN(CC)CC4)cc3)c2)c(Cl)c(OC)cc1OC	3.451	95.09	560.486	95.09	3
EGFR	EGFR_30362749	Fluorescent ligand-binding assay	J Am Chem Soc.	Binding Kinetics Survey of the Drugged Kinome	30362749	Kinase	NA	BI 2536	O=C(NC1CCN(C)CC1)c1cc(OC)c(Nc2nc3N([C@H](CC)C(=O)N(C)c3cn2)C2CCCC2)cc1	6.12	-4.71	1.41	literature	O=C(NC1CCN(C)CC1)c1cc(OC)c(Nc2nc3N([C@H](CC)C(=O)N(C)c3cn2)C2CCCC2)cc1	3.039	102.93	521.666	102.93	0
EGFR	EGFR_30362749	Fluorescent ligand-binding assay	J Am Chem Soc.	Binding Kinetics Survey of the Drugged Kinome	30362749	Kinase	NA	BI6727 (Volasertib)	O=C(NC1CCC(N2CCN(CC3CC3)CC2)CC1)c1cc(OC)c(Nc2nc3N(C(C)C)[C@H](CC)C(=O)N(C)c3cn2)cc1	6	-4.43	1.59	literature	O=C(NC1CCC(N2CCN(CC3CC3)CC2)CC1)c1cc(OC)c(Nc2nc3N(C(C)C)[C@H](CC)C(=O)N(C)c3cn2)cc1	3.654	106.17	618.827	106.17	0
EGFR	EGFR_30362749	Fluorescent ligand-binding assay	J Am Chem Soc.	Binding Kinetics Survey of the Drugged Kinome	30362749	Kinase	NA	BIBF1120 (Vargatef)	O=C(N(C)c1ccc(N/C(/c2ccccc2)=C/2\C(=O)Nc3c\2ccc(C(=O)OC)c3)cc1)CN1CCN(C)CC1	5.29	-3.95	1.31	literature	O=C(N(C)c1ccc(N/C(/c2ccccc2)=C/2\C(=O)Nc3c\2ccc(C(=O)OC)c3)cc1)CN1CCN(C)CC1	3.507	94.22	539.636	94.22	0
EGFR	EGFR_30362749	Fluorescent ligand-binding assay	J Am Chem Soc.	Binding Kinetics Survey of the Drugged Kinome	30362749	Kinase	NA	BIRB 796 (Doramapimod)	O=C(Nc1n(-c2ccc(C)cc2)nc(C(C)(C)C)c1)Nc1c2c(c(OCCN3CCOCC3)cc1)cccc2	5.84	-3.88	1.96	literature	O=C(Nc1n(-c2ccc(C)cc2)nc(C(C)(C)C)c1)Nc1c2c(c(OCCN3CCOCC3)cc1)cccc2	4.943	80.65	527.669	80.65	2
EGFR	EGFR_30362749	Fluorescent ligand-binding assay	J Am Chem Soc.	Binding Kinetics Survey of the Drugged Kinome	30362749	Kinase	NA	BMS 777607	Clc1c(N)nccc1Oc1c(F)cc(NC(=O)C=2C(=O)N(c3ccc(F)cc3)C=CC=2OCC)cc1	5.35	-4.03	1.32	literature	Clc1c(N)nccc1Oc1c(F)cc(NC(=O)C=2C(=O)N(c3ccc(F)cc3)C=CC=2OCC)cc1	3.964	106.78	512.9	108.47	2
EGFR	EGFR_30362749	Fluorescent ligand-binding assay	J Am Chem Soc.	Binding Kinetics Survey of the Drugged Kinome	30362749	Kinase	NA	BMS-599626 (AC480)	Fc1cc(Cn2ncc3c2ccc(NC2=NC=Nn4c2c(C)c(NC(=O)OC[C@H]2NCCOC2)c4)c3)ccc1	9.83	-7.06	2.77	literature	Fc1cc(Cn2ncc3c2ccc(NC2=NC=Nn4c2c(C)c(NC(=O)OC[C@H]2NCCOC2)c4)c3)ccc1	2.907	119.09	530.564	119.63	1
EGFR	EGFR_30362749	Fluorescent ligand-binding assay	J Am Chem Soc.	Binding Kinetics Survey of the Drugged Kinome	30362749	Kinase	NA	BX-795	Ic1c(NCCCNC(=O)c2sccc2)nc(Nc2cc(NC(=O)N3CCCC3)ccc2)nc1	5.24	-3.86	1.39	literature	Ic1c(NCCCNC(=O)c2sccc2)nc(Nc2cc(NC(=O)N3CCCC3)ccc2)nc1	3.106	111.28	591.478	111.28	0
EGFR	EGFR_30362749	Fluorescent ligand-binding assay	J Am Chem Soc.	Binding Kinetics Survey of the Drugged Kinome	30362749	Kinase	NA	BX-912	Brc1c(NCCc2[nH]cnc2)nc(Nc2cc(NC(=O)N3CCCC3)ccc2)nc1	5.96	-4.48	1.47	literature	Brc1c(NCCc2[nH]cnc2)nc(Nc2cc(NC(=O)N3CCCC3)ccc2)nc1	1.234	110.86	471.363	110.86	0
EGFR	EGFR_30362749	Fluorescent ligand-binding assay	J Am Chem Soc.	Binding Kinetics Survey of the Drugged Kinome	30362749	Kinase	NA	Barasertib (AZD1152-HQPA)	P(=O)(OCCN(CCCOc1cc2ncnc(Nc3[nH]nc(CC(=O)Nc4cc(F)ccc4)c3)c2cc1)CC)(O)O	6.73	-5.47	1.26	literature	P(=O)(OCCN(CCCOc1cc2ncnc(Nc3[nH]nc(CC(=O)Nc4cc(F)ccc4)c3)c2cc1)CC)(O)O	1.886	174.82	587.549	174.82
EGFR	EGFR_30362749	Fluorescent ligand-binding assay	J Am Chem Soc.	Binding Kinetics Survey of the Drugged Kinome	30362749	Kinase	NA	Bosutinib (SKI-606)	Clc1c(OC)cc(Nc2c(C#N)cnc3c2cc(OC)c(OCCCN2CCN(C)CC2)c3)c(Cl)c1	8.04	-6.5	1.53	literature	Clc1c(OC)cc(Nc2c(C#N)cnc3c2cc(OC)c(OCCCN2CCN(C)CC2)c3)c(Cl)c1	3.93474	82.88	530.456	82.88	4
EGFR	EGFR_30362749	Fluorescent ligand-binding assay	J Am Chem Soc.	Binding Kinetics Survey of the Drugged Kinome	30362749	Kinase	NA	Brivanib (BMS-540215)	Fc1c(OC2=NC=Nn3c2c(C)c(OC[C@H](O)C)c3)ccc2[nH]c(C)cc12	5.84	-4.4	1.45	literature	Fc1c(OC2=NC=Nn3c2c(C)c(OC[C@H](O)C)c3)ccc2[nH]c(C)cc12	3.21	84.13	370.384	84.67	0
EGFR	EGFR_30362749	Fluorescent ligand-binding assay	J Am Chem Soc.	Binding Kinetics Survey of the Drugged Kinome	30362749	Kinase	NA	Brivanib alaninate (BMS-582664) - prodrug	Fc1c(OC2=NC=Nn3c2c(C)c(OC[C@H](OC(=O)[C@@H](N)C)C)c3)ccc2[nH]c(C)cc12	5.96	-4.44	1.54	literature	Fc1c(OC2=NC=Nn3c2c(C)c(OC[C@H](OC(=O)[C@@H](N)C)C)c3)ccc2[nH]c(C)cc12	2.97074	116.22	441.463	116.76	0
EGFR	EGFR_30362749	Fluorescent ligand-binding assay	J Am Chem Soc.	Binding Kinetics Survey of the Drugged Kinome	30362749	Kinase	NA	CCT137690	Brc1c(N2CCN(Cc3noc(C)c3)CC2)c2[nH]c(-c3ccc(N4CCN(C)CC4)cc3)nc2nc1	5.21	-3.87	1.23	literature	Brc1c(N2CCN(Cc3noc(C)c3)CC2)c2[nH]c(-c3ccc(N4CCN(C)CC4)cc3)nc2nc1	2.25753	80.56	551.493	80.56	0
EGFR	EGFR_30362749	Fluorescent ligand-binding assay	J Am Chem Soc.	Binding Kinetics Survey of the Drugged Kinome	30362749	Kinase	NA	CEP33779	S(=O)(=O)(C)c1ccc(C=2c3n(nc(Nc4cc(N5CCN(C)CC5)ccc4)n3)C=CC=2)cc1	5.34	-4.08	1.26	literature	S(=O)(=O)(C)c1ccc(C=2c3n(nc(Nc4cc(N5CCN(C)CC5)ccc4)n3)C=CC=2)cc1	1.624	83.36	462.578	82.84	0
EGFR	EGFR_30362749	Fluorescent ligand-binding assay	J Am Chem Soc.	Binding Kinetics Survey of the Drugged Kinome	30362749	Kinase	NA	CH5424802	O=C1c2c3c([nH]c2C(C)(C)c2c1cc(CC)c(N1CCC(N4CCOCC4)CC1)c2)cc(C#N)cc3	6.01	-4.67	1.38	literature	O=C1c2c3c([nH]c2C(C)(C)c2c1cc(CC)c(N1CCC(N4CCOCC4)CC1)c2)cc(C#N)cc3	5.589	72.36	482.628	72.36	4
EGFR	EGFR_30362749	Fluorescent ligand-binding assay	J Am Chem Soc.	Binding Kinetics Survey of the Drugged Kinome	30362749	Kinase	NA	CP 673451	O(CCOc1cc2ncn(-c3nc4c(N5CCC(N)CC5)cccc4cc3)c2cc1)C	5.71	-4.08	1.65	literature	O(CCOc1cc2ncn(-c3nc4c(N5CCC(N)CC5)cccc4cc3)c2cc1)C	3.25174	78.43	417.513	78.43	0
EGFR	EGFR_30362749	Fluorescent ligand-binding assay	J Am Chem Soc.	Binding Kinetics Survey of the Drugged Kinome	30362749	Kinase	NA	CP-724714	O=C(NC/C=C/c1cc2c(Nc3cc(C)c(Oc4cnc(C)cc4)cc3)ncnc2cc1)COC	8.05	-6.37	1.68	literature	O=C(NC/C=C/c1cc2c(Nc3cc(C)c(Oc4cnc(C)cc4)cc3)ncnc2cc1)COC	3.616	98.26	469.545	98.26	0
EGFR	EGFR_30362749	Fluorescent ligand-binding assay	J Am Chem Soc.	Binding Kinetics Survey of the Drugged Kinome	30362749	Kinase	NA	CX-4945 (Silmitasertib)	Clc1cc(Nc2nc3c(c4c2ccnc4)ccc(C(=O)O)c3)ccc1	5.91	-4.53	1.39	literature	Clc1cc(Nc2nc3c(c4c2ccnc4)ccc(C(=O)O)c3)ccc1	4.223	75.11	349.777	75.11	2
EGFR	EGFR_30362749	Fluorescent ligand-binding assay	J Am Chem Soc.	Binding Kinetics Survey of the Drugged Kinome	30362749	Kinase	NA	CYC116	N(c1nc(-c2c(C)nc(N)s2)ccn1)c1ccc(N2CCOCC2)cc1	6.06	-4.82	1.24	literature	N(c1nc(-c2c(C)nc(N)s2)ccn1)c1ccc(N2CCOCC2)cc1	1.126	89.19	368.465	89.19	1
EGFR	EGFR_30362749	Fluorescent ligand-binding assay	J Am Chem Soc.	Binding Kinetics Survey of the Drugged Kinome	30362749	Kinase	NA	Cediranib (AZD2171)	Fc1c(Oc2ncnc3c2cc(OC)c(OCCCN2CCCC2)c3)ccc2[nH]c(C)cc12	6.82	-6.04	1.5	literature	Fc1c(Oc2ncnc3c2cc(OC)c(OCCCN2CCCC2)c3)ccc2[nH]c(C)cc12	4.21274	72.5	450.514	72.5	3
EGFR	EGFR_30362749	Fluorescent ligand-binding assay	J Am Chem Soc.	Binding Kinetics Survey of the Drugged Kinome	30362749	Kinase	NA	Crenolanib (CP-868596)	O(CC1(C)COC1)c1cc2ncn(-c3nc4c(N5CCC(N)CC5)cccc4cc3)c2cc1	5.54	-4.04	1.5	literature	O(CC1(C)COC1)c1cc2ncn(-c3nc4c(N5CCC(N)CC5)cccc4cc3)c2cc1	3.834	78.43	443.551	78.43	3
EGFR	EGFR_30362749	Fluorescent ligand-binding assay	J Am Chem Soc.	Binding Kinetics Survey of the Drugged Kinome	30362749	Kinase	NA	Cyt387	O=C(NCC#N)c1ccc(-c2nc(Nc3ccc(N4CCOCC4)cc3)ncc2)cc1	5.43	-4.11	1.33	literature	O=C(NCC#N)c1ccc(-c2nc(Nc3ccc(N4CCOCC4)cc3)ncc2)cc1	1.468	103.17	414.469	103.17	3
EGFR	EGFR_30362749	Fluorescent ligand-binding assay	J Am Chem Soc.	Binding Kinetics Survey of the Drugged Kinome	30362749	Kinase	NA	Dabrafenib (GSK2118436)	S(=O)(=O)(Nc1c(F)c(-c2c(-c3nc(N)ncc3)sc(C(C)(C)C)n2)ccc1)c1c(F)cccc1F	5.04	-4.71	1.63	literature	S(=O)(=O)(Nc1c(F)c(-c2c(-c3nc(N)ncc3)sc(C(C)(C)C)n2)ccc1)c1c(F)cccc1F	4.291	110.86	519.572	110.86	4
EGFR	EGFR_30362749	Fluorescent ligand-binding assay	J Am Chem Soc.	Binding Kinetics Survey of the Drugged Kinome	30362749	Kinase	NA	Dasatinib (BMS-354825)	Clc1c(NC(=O)c2sc(Nc3nc(C)nc(N4CCN(CCO)CC4)c3)nc2)c(C)ccc1	7.6	-6.01	1.6	literature	Clc1c(NC(=O)c2sc(Nc3nc(C)nc(N4CCN(CCO)CC4)c3)nc2)c(C)ccc1	1.535	106.51	488.016	106.51	4
EGFR	EGFR_30362749	Fluorescent ligand-binding assay	J Am Chem Soc.	Binding Kinetics Survey of the Drugged Kinome	30362749	Kinase	NA	Desmethyl Erlotinib (CP-473420)	O(CCOc1c(OCCO)cc2c(Nc3cc(C#C)ccc3)ncnc2c1)C	9.02	-7.33	1.69	literature	O(CCOc1c(OCCO)cc2c(Nc3cc(C#C)ccc3)ncnc2c1)C	1.97548	85.73	379.416	85.73	0
EGFR	EGFR_30362749	Fluorescent ligand-binding assay	J Am Chem Soc.	Binding Kinetics Survey of the Drugged Kinome	30362749	Kinase	NA	Dovitinib (TKI-258)	Fc1c2C(N)=C(c3[nH]c4c(n3)ccc(N3CCN(C)CC3)c4)C(=O)Nc2ccc1	5.61	-4.16	1.49	literature	Fc1c2C(N)=C(c3[nH]c4c(n3)ccc(N3CCN(C)CC3)c4)C(=O)Nc2ccc1	1.59	90.28	392.438	94.04	3
EGFR	EGFR_30362749	Fluorescent ligand-binding assay	J Am Chem Soc.	Binding Kinetics Survey of the Drugged Kinome	30362749	Kinase	NA	E7080 (Lenvatinib)	Clc1c(NC(=O)NC2CC2)ccc(Oc2c3c(ncc2)cc(OC)c(C(=O)N)c3)c1	6.19	-5.18	1.35	literature	Clc1c(NC(=O)NC2CC2)ccc(Oc2c3c(ncc2)cc(OC)c(C(=O)N)c3)c1	2.902	115.57	426.86	115.57	0
EGFR	EGFR_30362749	Fluorescent ligand-binding assay	J Am Chem Soc.	Binding Kinetics Survey of the Drugged Kinome	30362749	Kinase	NA	ENMD-2076	N(c1nc(/C=C/c2ccccc2)nc(N2CCN(C)CC2)c1)c1n[nH]c(C)c1	5.91	-4.54	1.37	literature	N(c1nc(/C=C/c2ccccc2)nc(N2CCN(C)CC2)c1)c1n[nH]c(C)c1	2.969	72.97	375.48	72.97	0
EGFR	EGFR_30362749	Fluorescent ligand-binding assay	J Am Chem Soc.	Binding Kinetics Survey of the Drugged Kinome	30362749	Kinase	NA	Enzastaurin (LY317615)	O=C1C(c2c3c(n(C)c2)cccc3)=C(c2c3c(n(C4CCN(Cc5ncccc5)CC4)c2)cccc3)C(=O)N1	5.05	-3.46	1.42	literature	O=C1C(c2c3c(n(C)c2)cccc3)=C(c2c3c(n(C4CCN(Cc5ncccc5)CC4)c2)cccc3)C(=O)N1	5.661	72.16	515.617	72.16	3
EGFR	EGFR_30362749	Fluorescent ligand-binding assay	J Am Chem Soc.	Binding Kinetics Survey of the Drugged Kinome	30362749	Kinase	NA	Erlotinib HCl	O(CCOc1c(OCCOC)cc2ncnc(Nc3cc(C#C)ccc3)c2c1)C	8.97	-7.18	1.8	literature	O(CCOc1c(OCCOC)cc2ncnc(Nc3cc(C#C)ccc3)c2c1)C	2.33922	74.73	393.443	74.73	4
EGFR	EGFR_30362749	Fluorescent ligand-binding assay	J Am Chem Soc.	Binding Kinetics Survey of the Drugged Kinome	30362749	Kinase	NA	Flavopiridol HCl	Clc1c(C=2Oc3c([C@@H]4[C@H](O)CN(C)CC4)c(O)cc(O)c3C(=O)C=2)cccc1	5.59	-4.13	1.46	literature	Clc1c(C=2Oc3c([C@@H]4[C@H](O)CN(C)CC4)c(O)cc(O)c3C(=O)C=2)cccc1	2.902	90.23	401.846	94.14	0
EGFR	EGFR_30362749	Fluorescent ligand-binding assay	J Am Chem Soc.	Binding Kinetics Survey of the Drugged Kinome	30362749	Kinase	NA	Foretinib (GSK1363089 - XL880)	Fc1c(Oc2c3c(ncc2)cc(OCCCN2CCOCC2)c(OC)c3)ccc(NC(=O)C2(C(=O)Nc3ccc(F)cc3)CC2)c1	6.65	-5.2	1.46	literature	Fc1c(Oc2c3c(ncc2)cc(OCCCN2CCOCC2)c(OC)c3)ccc(NC(=O)C2(C(=O)Nc3ccc(F)cc3)CC2)c1	4.59374	111.25	632.664	111.25	2
EGFR	EGFR_30362749	Fluorescent ligand-binding assay	J Am Chem Soc.	Binding Kinetics Survey of the Drugged Kinome	30362749	Kinase	NA	GDC-0879	O/N=C\1/c2c(cc(-c3c(-c4ccncc4)nn(CCO)c3)cc2)CC/1	5.06	-3.53	1.52	literature	O/N=C\1/c2c(cc(-c3c(-c4ccncc4)nn(CCO)c3)cc2)CC/1	1.839	83.53	334.379	83.53	0
EGFR	EGFR_30362749	Fluorescent ligand-binding assay	J Am Chem Soc.	Binding Kinetics Survey of the Drugged Kinome	30362749	Kinase	NA	GDC-0980 (RG7422)	O=C([C@@H](O)C)N1CCN(Cc2c(C)c3nc(-c4cnc(N)nc4)nc(N4CCOCC4)c3s2)CC1	6.35	-5	1.35	literature	O=C([C@@H](O)C)N1CCN(Cc2c(C)c3nc(-c4cnc(N)nc4)nc(N4CCOCC4)c3s2)CC1	-1.016	133.83	498.612	133.83	2
EGFR	EGFR_30362749	Fluorescent ligand-binding assay	J Am Chem Soc.	Binding Kinetics Survey of the Drugged Kinome	30362749	Kinase	NA	GSK1070916	O=C(N(C)C)Nc1ccc(-c2c(-c3c4c([nH]c(-c5cc(CN(C)C)ccc5)c4)ncc3)cn(CC)n2)cc1	6.36	-4.79	1.57	literature	O=C(N(C)C)Nc1ccc(-c2c(-c3c4c([nH]c(-c5cc(CN(C)C)ccc5)c4)ncc3)cn(CC)n2)cc1	4.46	82.08	507.642	82.08	1
EGFR	EGFR_30362749	Fluorescent ligand-binding assay	J Am Chem Soc.	Binding Kinetics Survey of the Drugged Kinome	30362749	Kinase	NA	GSK1838705A	Fc1c(C(=O)NC)c(Nc2nc(Nc3c(OC)cc4c(N(C(=O)CN(C)C)CC4)c3)nc3[nH]ccc23)ccc1	5.8	-4.41	1.39	literature	Fc1c(C(=O)NC)c(Nc2nc(Nc3c(OC)cc4c(N(C(=O)CN(C)C)CC4)c3)nc3[nH]ccc23)ccc1	2.101	127.51	532.58	127.51	0
EGFR	EGFR_30362749	Fluorescent ligand-binding assay	J Am Chem Soc.	Binding Kinetics Survey of the Drugged Kinome	30362749	Kinase	NA	GSK1904529A	S(=O)(=O)(C)N1CCN(C2CCN(c3c(CC)cc(Nc4nc(-c5c(-c6cc(C(=O)Nc7c(F)cccc7F)c(OC)cc6)nc6n5C=CC=C6)ccn4)c(OC)c3)CC2)CC1	5.33	-3.94	1.39	literature	S(=O)(=O)(C)N1CCN(C2CCN(c3c(CC)cc(Nc4nc(-c5c(-c6cc(C(=O)Nc7c(F)cccc7F)c(OC)cc6)nc6n5C=CC=C6)ccn4)c(OC)c3)CC2)CC1	4.96953	147.05	851.98	146.53	0
EGFR	EGFR_30362749	Fluorescent ligand-binding assay	J Am Chem Soc.	Binding Kinetics Survey of the Drugged Kinome	30362749	Kinase	NA	Gefitinib (Iressa)	Clc1c(F)ccc(Nc2ncnc3c2cc(OCCCN2CCOCC2)c(OC)c3)c1	9.13	-7.32	1.81	literature	Clc1c(F)ccc(Nc2ncnc3c2cc(OCCCN2CCOCC2)c(OC)c3)c1	3.14974	68.74	446.91	68.74	4
EGFR	EGFR_30362749	Fluorescent ligand-binding assay	J Am Chem Soc.	Binding Kinetics Survey of the Drugged Kinome	30362749	Kinase	NA	Hesperadin	S(=O)(=O)(Nc1cc2/C(=C(/Nc3ccc(CN4CCCCC4)cc3)\c3ccccc3)/C(=O)Nc2cc1)CC	5.92	-4.65	1.28	literature	S(=O)(=O)(Nc1cc2/C(=C(/Nc3ccc(CN4CCCCC4)cc3)\c3ccccc3)/C(=O)Nc2cc1)CC	5.433	90.54	516.666	90.54	0
EGFR	EGFR_30362749	Fluorescent ligand-binding assay	J Am Chem Soc.	Binding Kinetics Survey of the Drugged Kinome	30362749	Kinase	NA	INCB28060	Fc1c(C(=O)NC)ccc(C2=Nn3c(Cc4cc5c(nccc5)cc4)cnc3N=C2)c1	5.15	-3.76	1.41	literature	Fc1c(C(=O)NC)ccc(C2=Nn3c(Cc4cc5c(nccc5)cc4)cnc3N=C2)c1	3.072	84.53	412.428	85.07	0
EGFR	EGFR_30362749	Fluorescent ligand-binding assay	J Am Chem Soc.	Binding Kinetics Survey of the Drugged Kinome	30362749	Kinase	NA	INK 128 (MLN0128)	Nc1oc2c(n1)cc(-c1nn(C(C)C)c3ncnc(N)c13)cc2	5.39	-3.92	1.51	literature	Nc1oc2c(n1)cc(-c1nn(C(C)C)c3ncnc(N)c13)cc2	0.97853	121.67	309.333	121.67	0
EGFR	EGFR_30362749	Fluorescent ligand-binding assay	J Am Chem Soc.	Binding Kinetics Survey of the Drugged Kinome	30362749	Kinase	NA	JNJ-7706621	S(=O)(=O)(N)c1ccc(Nc2nn(C(=O)c3c(F)cccc3F)c(N)n2)cc1	5.72	-4.46	1.26	literature	S(=O)(=O)(N)c1ccc(Nc2nn(C(=O)c3c(F)cccc3F)c(N)n2)cc1	0.89	145.99	394.362	145.99	0
EGFR	EGFR_30362749	Fluorescent ligand-binding assay	J Am Chem Soc.	Binding Kinetics Survey of the Drugged Kinome	30362749	Kinase	NA	KRN 633	Clc1c(NC(=O)NCCC)ccc(Oc2ncnc3c2cc(OC)c(OC)c3)c1	5.61	-4.01	1.6	literature	Clc1c(NC(=O)NCCC)ccc(Oc2ncnc3c2cc(OC)c(OC)c3)c1	3.22974	94.6	416.865	94.6	1
EGFR	EGFR_30362749	Fluorescent ligand-binding assay	J Am Chem Soc.	Binding Kinetics Survey of the Drugged Kinome	30362749	Kinase	NA	KW 2449	O=C(N1CCNCC1)c1ccc(/C=C/c2n[nH]c3c2cccc3)cc1	5.17	-3.7	1.47	literature	O=C(N1CCNCC1)c1ccc(/C=C/c2n[nH]c3c2cccc3)cc1	3.087	61.02	332.407	61.02	0
EGFR	EGFR_30362749	Fluorescent ligand-binding assay	J Am Chem Soc.	Binding Kinetics Survey of the Drugged Kinome	30362749	Kinase	NA	Ki8751	Fc1c(NC(=O)Nc2c(F)cc(Oc3c4c(ncc3)cc(OC)c(OC)c4)cc2)ccc(F)c1	5.5	-3.47	1.5	literature	Fc1c(NC(=O)Nc2c(F)cc(Oc3c4c(ncc3)cc(OC)c(OC)c4)cc2)ccc(F)c1	4.56974	81.71	469.419	81.71	0
EGFR	EGFR_30362749	Fluorescent ligand-binding assay	J Am Chem Soc.	Binding Kinetics Survey of the Drugged Kinome	30362749	Kinase	NA	LDN193189	N1(c2ccc(C3=Cn4ncc(-c5c6c(ncc5)cccc6)c4N=C3)cc2)CCNCC1	5.17	-3.66	1.51	literature	N1(c2ccc(C3=Cn4ncc(-c5c6c(ncc5)cccc6)c4N=C3)cc2)CCNCC1	3.039	58.34	406.493	58.35	0
EGFR	EGFR_30362749	Fluorescent ligand-binding assay	J Am Chem Soc.	Binding Kinetics Survey of the Drugged Kinome	30362749	Kinase	NA	LY2228820	Fc1ccc(-c2c(-c3nc4n(CC(C)(C)C)c(N)nc4cc3)[nH]c(C(C)(C)C)n2)cc1	6.45	-4.83	1.62	literature	Fc1ccc(-c2c(-c3nc4n(CC(C)(C)C)c(N)nc4cc3)[nH]c(C(C)(C)C)n2)cc1	5.51406	85.41	420.536	85.41	2
EGFR	EGFR_30362749	Fluorescent ligand-binding assay	J Am Chem Soc.	Binding Kinetics Survey of the Drugged Kinome	30362749	Kinase	NA	LY2784544	Clc1cc(F)c(Cc2c(C)nc3C(CN4CCOCC4)=CC(Nc4n[nH]c(C)c4)=Nn23)cc1	5.11	-3.52	1.58	literature	Clc1cc(F)c(Cc2c(C)nc3C(CN4CCOCC4)=CC(Nc4n[nH]c(C)c4)=Nn23)cc1	3.368	83.36	469.952	83.37	2
EGFR	EGFR_30362749	Fluorescent ligand-binding assay	J Am Chem Soc.	Binding Kinetics Survey of the Drugged Kinome	30362749	Kinase	NA	Linifanib (ABT-869)	Fc1c(NC(=O)Nc2ccc(-c3c4c(N)n[nH]c4ccc3)cc2)cc(C)cc1	5.64	-3.73	1.45	literature	Fc1c(NC(=O)Nc2ccc(-c3c4c(N)n[nH]c4ccc3)cc2)cc(C)cc1	4.535	95.83	375.407	95.83	3
EGFR	EGFR_30362749	Fluorescent ligand-binding assay	J Am Chem Soc.	Binding Kinetics Survey of the Drugged Kinome	30362749	Kinase	NA	Linsitinib (OSI-906)	OC1(C)CC(c2n3c(c(-c4cc5nc(-c6ccccc6)ccc5cc4)n2)C(N)=NC=C3)C1	5.78	-4.53	1.25	literature	OC1(C)CC(c2n3c(c(-c4cc5nc(-c6ccccc6)ccc5cc4)n2)C(N)=NC=C3)C1	3.405	89.32	421.504	89.33	0
EGFR	EGFR_30362749	Fluorescent ligand-binding assay	J Am Chem Soc.	Binding Kinetics Survey of the Drugged Kinome	30362749	Kinase	NA	MGCD-265	S=C(NC(=O)Cc1ccc(F)cc1)Nc1cc(F)c(Oc2c3sc(-c4ncc(CNCCOC)cc4)cc3ncc2)cc1	5.78	-4.23	1.56	literature	S=C(NC(=O)Cc1ccc(F)cc1)Nc1cc(F)c(Oc2c3sc(-c4ncc(CNCCOC)cc4)cc3ncc2)cc1	5.155	129.49	619.717	97.4	2
EGFR	EGFR_30362749	Fluorescent ligand-binding assay	J Am Chem Soc.	Binding Kinetics Survey of the Drugged Kinome	30362749	Kinase	NA	MK-5108 (VX-689)	Clc1c(F)c(OC2CCC(C(=O)O)(Cc3nc(Nc4sccn4)ccc3)CC2)ccc1	6.31	-4.79	1.52	literature	Clc1c(F)c(OC2CCC(C(=O)O)(Cc3nc(Nc4sccn4)ccc3)CC2)ccc1	4.806	84.34	461.945	84.34	0
EGFR	EGFR_30362749	Fluorescent ligand-binding assay	J Am Chem Soc.	Binding Kinetics Survey of the Drugged Kinome	30362749	Kinase	NA	MLN8054	Clc1cc2C(c3c(F)cccc3F)=NCc3c(nc(Nc4ccc(C(=O)O)cc4)nc3)-c2cc1	6.13	-4.73	1.4	literature	Clc1cc2C(c3c(F)cccc3F)=NCc3c(nc(Nc4ccc(C(=O)O)cc4)nc3)-c2cc1	5.189	87.47	476.87	87.47	0
EGFR	EGFR_30362749	Fluorescent ligand-binding assay	J Am Chem Soc.	Binding Kinetics Survey of the Drugged Kinome	30362749	Kinase	NA	MLN8237 (Alisertib)	Clc1cc2C(c3c(F)cccc3OC)=NCc3c(nc(Nc4cc(OC)c(C(=O)O)cc4)nc3)-c2cc1	6.55	-5.21	1.34	literature	Clc1cc2C(c3c(F)cccc3OC)=NCc3c(nc(Nc4cc(OC)c(C(=O)O)cc4)nc3)-c2cc1	4.983	105.93	518.932	105.93	3
EGFR	EGFR_30362749	Fluorescent ligand-binding assay	J Am Chem Soc.	Binding Kinetics Survey of the Drugged Kinome	30362749	Kinase	NA	Masitinib (AB1010)	O=C(Nc1cc(Nc2scc(-c3cnccc3)n2)c(C)cc1)c1ccc(CN2CCN(C)CC2)cc1	5.23	-3.7	1.53	literature	O=C(Nc1cc(Nc2scc(-c3cnccc3)n2)c(C)cc1)c1ccc(CN2CCN(C)CC2)cc1	3.816	73.39	498.655	73.39	3
EGFR	EGFR_30362749	Fluorescent ligand-binding assay	J Am Chem Soc.	Binding Kinetics Survey of the Drugged Kinome	30362749	Kinase	NA	Milciclib (PHA-848125)	O=C(NC)c1nn(C)c-2c1C(C)(C)Cc1c-2nc(Nc2ccc(N3CCN(C)CC3)cc2)nc1	5.83	-4.46	1.41	literature	O=C(NC)c1nn(C)c-2c1C(C)(C)Cc1c-2nc(Nc2ccc(N3CCN(C)CC3)cc2)nc1	0.92053	91.21	460.586	91.21	1
EGFR	EGFR_30362749	Fluorescent ligand-binding assay	J Am Chem Soc.	Binding Kinetics Survey of the Drugged Kinome	30362749	Kinase	NA	Motesanib Diphosphate (AMG-706)	O=C(Nc1cc2NCC(C)(C)c2cc1)c1c(NCc2ccncc2)nccc1	6.09	-4.3	1.8	literature	O=C(Nc1cc2NCC(C)(C)c2cc1)c1c(NCc2ccncc2)nccc1	2.549	78.94	373.46	78.94	3
EGFR	EGFR_30362749	Fluorescent ligand-binding assay	J Am Chem Soc.	Binding Kinetics Survey of the Drugged Kinome	30362749	Kinase	NA	NVP-ADW742	O(Cc1ccccc1)c1cc(-c2c3c(N)ncnc3n(C3CC(CN4CCCC4)C3)c2)ccc1	5.76	-4.28	1.48	literature	O(Cc1ccccc1)c1cc(-c2c3c(N)ncnc3n(C3CC(CN4CCCC4)C3)c2)ccc1	5.319	69.2	453.59	69.2	0
EGFR	EGFR_30362749	Fluorescent ligand-binding assay	J Am Chem Soc.	Binding Kinetics Survey of the Drugged Kinome	30362749	Kinase	NA	NVP-BGT226	FC(F)(F)c1c(N2CCNCC2)ccc(N2C(=O)N(C)c3c2c2c(nc3)ccc(-c3cnc(OC)cc3)c2)c1.O=C(O)/C=C\C(=O)O	5.35	-3.9	1.45	literature	FC(F)(F)c1c(N2CCNCC2)ccc(N2C(=O)N(C)c3c2c2c(nc3)ccc(-c3cnc(OC)cc3)c2)c1	4.03876	73.83	534.542	77.21	2
EGFR	EGFR_30362749	Fluorescent ligand-binding assay	J Am Chem Soc.	Binding Kinetics Survey of the Drugged Kinome	30362749	Kinase	NA	NVP-TAE226	Clc1c(Nc2c(C(=O)NC)cccc2)nc(Nc2c(OC)cc(N3CCOCC3)cc2)nc1	7.75	-6.25	1.5	literature	Clc1c(Nc2c(C(=O)NC)cccc2)nc(Nc2c(OC)cc(N3CCOCC3)cc2)nc1	2.424	100.64	468.945	100.64	0
EGFR	EGFR_30362749	Fluorescent ligand-binding assay	J Am Chem Soc.	Binding Kinetics Survey of the Drugged Kinome	30362749	Kinase	NA	Neratinib (HKI-272)	Clc1c(OCc2ncccc2)ccc(Nc2c(C#N)cnc3c2cc(NC(=O)/C=C/CN(C)C)c(OCC)c3)c1	9.68	-7.28	2.44	literature	Clc1c(OCc2ncccc2)ccc(Nc2c(C#N)cnc3c2cc(NC(=O)/C=C/CN(C)C)c(OCC)c3)c1	4.3	112.4	557.054	112.4	4
EGFR	EGFR_30362749	Fluorescent ligand-binding assay	J Am Chem Soc.	Binding Kinetics Survey of the Drugged Kinome	30362749	Kinase	NA	OSI-027	O=C(O)C1CCC(c2n3N=CN=C(N)c3c(-c3[nH]c4c(OC)cccc4c3)n2)CC1	5.32	-3.86	1.46	literature	O=C(O)C1CCC(c2n3N=CN=C(N)c3c(-c3[nH]c4c(OC)cccc4c3)n2)CC1	2.35053	130.88	406.446	131.42	2
EGFR	EGFR_30362749	Fluorescent ligand-binding assay	J Am Chem Soc.	Binding Kinetics Survey of the Drugged Kinome	30362749	Kinase	NA	PF-00562271	S(=O)(=O)(N(C)c1c(CNc2c(C(F)(F)F)cnc(Nc3cc4c(NC(=O)C4)cc3)n2)cccn1)C	5.33	-3.76	1.57	literature	S(=O)(=O)(N(C)c1c(CNc2c(C(F)(F)F)cnc(Nc3cc4c(NC(=O)C4)cc3)n2)cccn1)C	1.07576	129.21	507.497	129.21	0
EGFR	EGFR_30362749	Fluorescent ligand-binding assay	J Am Chem Soc.	Binding Kinetics Survey of the Drugged Kinome	30362749	Kinase	NA	PF-03814735	FC(F)(F)c1c(NC2CCC2)nc(Nc2cc3[C@@H]4N(C(=O)CNC(=O)C)[C@H](c3cc2)CC4)nc1	5.72	-4.31	1.41	literature	FC(F)(F)c1c(NC2CCC2)nc(Nc2cc3[C@@H]4N(C(=O)CNC(=O)C)[C@H](c3cc2)CC4)nc1	2.73576	99.25	474.487	99.25	0
EGFR	EGFR_30362749	Fluorescent ligand-binding assay	J Am Chem Soc.	Binding Kinetics Survey of the Drugged Kinome	30362749	Kinase	NA	PHA-665752	Clc1c(CS(=O)(=O)c2cc3/C(=C/c4c(C)c(C(=O)N5[C@@H](CN6CCCC6)CCC5)c(C)[nH]4)/C(=O)Nc3cc2)c(Cl)ccc1	5.64	-4.09	1.53	literature	Clc1c(CS(=O)(=O)c2cc3/C(=C/c4c(C)c(C(=O)N5[C@@H](CN6CCCC6)CCC5)c(C)[nH]4)/C(=O)Nc3cc2)c(Cl)ccc1	5.282	102.58	641.62	102.58	0
EGFR	EGFR_30362749	Fluorescent ligand-binding assay	J Am Chem Soc.	Binding Kinetics Survey of the Drugged Kinome	30362749	Kinase	NA	PHA-680632	O=C(Nc1c(CC)cccc1CC)N1Cc2c(NC(=O)c3ccc(N4CCN(C)CC4)cc3)n[nH]c2C1	5.15	-3.71	1.43	literature	O=C(Nc1c(CC)cccc1CC)N1Cc2c(NC(=O)c3ccc(N4CCN(C)CC4)cc3)n[nH]c2C1	3.374	96.6	501.635	96.6	0
EGFR	EGFR_30362749	Fluorescent ligand-binding assay	J Am Chem Soc.	Binding Kinetics Survey of the Drugged Kinome	30362749	Kinase	NA	PIK-75	BrC1=Cn2c(/C=N/N(S(=O)(=O)c3c(C)ccc([N+](=O)[O-])c3)C)cnc2C=C1	5.86	-4.58	1.27	literature	BrC1=Cn2c(/C=N/N(S(=O)(=O)c3c(C)ccc([N+](=O)[O-])c3)C)cnc2C=C1	3.093	113.38	452.289	110.18	0
EGFR	EGFR_30362749	Fluorescent ligand-binding assay	J Am Chem Soc.	Binding Kinetics Survey of the Drugged Kinome	30362749	Kinase	NA	PLX-4720	Clc1cnc2[nH]cc(C(=O)c3c(F)c(NS(=O)(=O)CCC)ccc3F)c2c1	5.19	-3.82	1.36	literature	Clc1cnc2[nH]cc(C(=O)c3c(F)c(NS(=O)(=O)CCC)ccc3F)c2c1	3.58	91.92	413.832	91.92	0
EGFR	EGFR_30362749	Fluorescent ligand-binding assay	J Am Chem Soc.	Binding Kinetics Survey of the Drugged Kinome	30362749	Kinase	NA	PP-121	Nc1ncnc2n(C3CCCC3)nc(-c3cnc4[nH]ccc4c3)c12	7.01	-5.55	1.46	literature	Nc1ncnc2n(C3CCCC3)nc(-c3cnc4[nH]ccc4c3)c12	1.75553	98.3	319.372	98.3	0
EGFR	EGFR_30362749	Fluorescent ligand-binding assay	J Am Chem Soc.	Binding Kinetics Survey of the Drugged Kinome	30362749	Kinase	NA	PP242	Oc1cc2c([nH]c(-c3nn(C(C)C)c4ncnc(N)c34)c2)cc1	6.19	-4.75	1.45	literature	Oc1cc2c([nH]c(-c3nn(C(C)C)c4ncnc(N)c34)c2)cc1	1.92806	105.64	308.345	105.64	0
EGFR	EGFR_30362749	Fluorescent ligand-binding assay	J Am Chem Soc.	Binding Kinetics Survey of the Drugged Kinome	30362749	Kinase	NA	Pazopanib HCl	S(=O)(=O)(N)c1c(C)ccc(Nc2nc(N(C)c3cc4nn(C)c(C)c4cc3)ccn2)c1	5.67	-4.25	1.42	literature	S(=O)(=O)(N)c1c(C)ccc(Nc2nc(N(C)c3cc4nn(C)c(C)c4cc3)ccn2)c1	1.865	119.03	437.528	119.03	4
EGFR	EGFR_30362749	Fluorescent ligand-binding assay	J Am Chem Soc.	Binding Kinetics Survey of the Drugged Kinome	30362749	Kinase	NA	Phenformin HCl	N=C(NC(=N)N)NCCc1ccccc1	5.37	-3.77	1.69	literature	N=C(NC(=N)N)NCCc1ccccc1	1.593	97.78	205.265	97.78	4
EGFR	EGFR_30362749	Fluorescent ligand-binding assay	J Am Chem Soc.	Binding Kinetics Survey of the Drugged Kinome	30362749	Kinase	NA	Ponatinib (AP24534)	FC(F)(F)c1c(CN2CCN(C)CC2)ccc(NC(=O)c2cc(C#Cc3n4N=CC=Cc4nc3)c(C)cc2)c1	7.13	-4.98	2.14	literature	FC(F)(F)c1c(CN2CCN(C)CC2)ccc(NC(=O)c2cc(C#Cc3n4N=CC=Cc4nc3)c(C)cc2)c1	4.88476	65.76	532.57	65.77	4
EGFR	EGFR_30362749	Fluorescent ligand-binding assay	J Am Chem Soc.	Binding Kinetics Survey of the Drugged Kinome	30362749	Kinase	NA	Quercetin (Sophoretin)	O=C1C(O)=C(c2cc(O)c(O)cc2)Oc2c1c(O)cc(O)c2	5.71	-4.42	1.3	literature	O=C1C(O)=C(c2cc(O)c(O)cc2)Oc2c1c(O)cc(O)c2	2.032	127.45	302.238	131.36	0
EGFR	EGFR_30362749	Fluorescent ligand-binding assay	J Am Chem Soc.	Binding Kinetics Survey of the Drugged Kinome	30362749	Kinase	NA	R406	Fc1c(Nc2nc3NC(=O)C(C)(C)Oc3cc2)nc(Nc2cc(OC)c(OC)c(OC)c2)nc1	6.67	-5.25	1.42	literature	Fc1c(Nc2nc3NC(=O)C(C)(C)Oc3cc2)nc(Nc2cc(OC)c(OC)c(OC)c2)nc1	1.87148	128.75	470.461	128.75	2
EGFR	EGFR_30362749	Fluorescent ligand-binding assay	J Am Chem Soc.	Binding Kinetics Survey of the Drugged Kinome	30362749	Kinase	NA	R788 (Fostamatinib) - prodrug	P(=O)(OCN1C(=O)C(C)(C)Oc2c1nc(Nc1c(F)cnc(Nc3cc(OC)c(OC)c(OC)c3)n1)cc2)(O)O	5.66	-4.31	1.34	literature	P(=O)(OCN1C(=O)C(C)(C)Oc2c1nc(Nc1c(F)cnc(Nc3cc(OC)c(OC)c(OC)c3)n1)cc2)(O)O	0.59748	186.72	580.466	186.72	4
EGFR	EGFR_30362749	Fluorescent ligand-binding assay	J Am Chem Soc.	Binding Kinetics Survey of the Drugged Kinome	30362749	Kinase	NA	SB 202190	Fc1ccc(-c2c(-c3ccncc3)nc(-c3ccc(O)cc3)[nH]2)cc1	6.34	-4.78	1.57	literature	Fc1ccc(-c2c(-c3ccncc3)nc(-c3ccc(O)cc3)[nH]2)cc1	3.924	61.8	331.35	61.8	0
EGFR	EGFR_30362749	Fluorescent ligand-binding assay	J Am Chem Soc.	Binding Kinetics Survey of the Drugged Kinome	30362749	Kinase	NA	SB 203580	[SH0](=O)(C)c1ccc(-c2[nH]c(c(-c3ccc(F)cc3)n2)-c2ccncc2)cc1	6.12	-4.65	1.47	literature	[SH0](=O)(C)c1ccc(-c2[nH]c(c(-c3ccc(F)cc3)n2)-c2ccncc2)cc1	2.837	77.85	377.443	58.64
EGFR	EGFR_30362749	Fluorescent ligand-binding assay	J Am Chem Soc.	Binding Kinetics Survey of the Drugged Kinome	30362749	Kinase	NA	SB590885	O(CCN(C)C)c1ccc(-c2[nH]c(c(-c3cc4c(/C(=N/O)/CC4)cc3)n2)-c2ccncc2)cc1	5.5	-4.06	1.46	literature	O(CCN(C)C)c1ccc(-c2[nH]c(c(-c3cc4c(/C(=N/O)/CC4)cc3)n2)-c2ccncc2)cc1	3.916	86.63	453.546	86.63	0
EGFR	EGFR_30362749	Fluorescent ligand-binding assay	J Am Chem Soc.	Binding Kinetics Survey of the Drugged Kinome	30362749	Kinase	NA	SNS-314	Clc1cc(NC(=O)Nc2sc(CCNc3ncnc4c3scc4)cn2)ccc1	5.97	-4.16	1.81	literature	Clc1cc(NC(=O)Nc2sc(CCNc3ncnc4c3scc4)cn2)ccc1	2.83	91.83	430.944	91.83
EGFR	EGFR_30362749	Fluorescent ligand-binding assay	J Am Chem Soc.	Binding Kinetics Survey of the Drugged Kinome	30362749	Kinase	NA	SU11274	Clc1cc(N(S(=O)(=O)c2cc3/C(=C/c4c(C)c(C(=O)N5CCN(C)CC5)c(C)[nH]4)/C(=O)Nc3cc2)C)ccc1	5.48	-3.88	1.6	literature	Clc1cc(N(S(=O)(=O)c2cc3/C(=C/c4c(C)c(C(=O)N5CCN(C)CC5)c(C)[nH]4)/C(=O)Nc3cc2)C)ccc1	2.608	105.82	568.098	105.82	0
EGFR	EGFR_30362749	Fluorescent ligand-binding assay	J Am Chem Soc.	Binding Kinetics Survey of the Drugged Kinome	30362749	Kinase	NA	Saracatinib (AZD0530)	Clc1c(Nc2ncnc3c2c(OC2CCOCC2)cc(OCCN2CCN(C)CC2)c3)c2OCOc2cc1	7.78	-6.08	1.7	literature	Clc1c(Nc2ncnc3c2c(OC2CCOCC2)cc(OCCN2CCN(C)CC2)c3)c2OCOc2cc1	2.962	90.44	542.036	90.44	3
EGFR	EGFR_30362749	Fluorescent ligand-binding assay	J Am Chem Soc.	Binding Kinetics Survey of the Drugged Kinome	30362749	Kinase	NA	Sotrastaurin (AEB071)	O=C1C(c2nc(N3CCN(C)CC3)nc3c2cccc3)=C(c2c3c([nH]c2)cccc3)C(=O)N1	5.49	-3.92	1.6	literature	O=C1C(c2nc(N3CCN(C)CC3)nc3c2cccc3)=C(c2c3c([nH]c2)cccc3)C(=O)N1	2.127	94.22	438.491	94.22	2
EGFR	EGFR_30362749	Fluorescent ligand-binding assay	J Am Chem Soc.	Binding Kinetics Survey of the Drugged Kinome	30362749	Kinase	NA	Staurosporine	O(C)[C@@H]1[C@H](NC)C[C@H]2O[C@]1(C)n1c3c4n2c2c(c4c4C(=O)NCc4c3c3c1cccc3)cccc2	7.09	-5.54	1.56	literature	O(C)[C@@H]1[C@H](NC)C[C@H]2O[C@]1(C)n1c3c4n2c2c(c4c4C(=O)NCc4c3c3c1cccc3)cccc2	6.35953	69.45	466.541	69.45	0
EGFR	EGFR_30362749	Fluorescent ligand-binding assay	J Am Chem Soc.	Binding Kinetics Survey of the Drugged Kinome	30362749	Kinase	NA	TAE684 (NVP-TAE684)	Clc1c(Nc2c(S(=O)(=O)C(C)C)cccc2)nc(Nc2c(OC)cc(N3CCC(N4CCN(C)CC4)CC3)cc2)nc1	7.27	-5.93	1.35	literature	Clc1c(Nc2c(S(=O)(=O)C(C)C)cccc2)nc(Nc2c(OC)cc(N3CCC(N4CCN(C)CC4)CC3)cc2)nc1	3.959	102.93	614.215	102.93	0
EGFR	EGFR_30362749	Fluorescent ligand-binding assay	J Am Chem Soc.	Binding Kinetics Survey of the Drugged Kinome	30362749	Kinase	NA	TAK-285	Clc1c(Oc2cc(C(F)(F)F)ccc2)ccc(Nc2ncnc3c2n(CCNC(=O)CC(O)(C)C)cc3)c1	8.82	-5.77	3.04	literature	Clc1c(Oc2cc(C(F)(F)F)ccc2)ccc(Nc2ncnc3c2n(CCNC(=O)CC(O)(C)C)cc3)c1	5.27582	101.3	547.965	101.3	1
EGFR	EGFR_30362749	Fluorescent ligand-binding assay	J Am Chem Soc.	Binding Kinetics Survey of the Drugged Kinome	30362749	Kinase	NA	TAK-901	S(=O)(=O)(CC)c1cc(-c2c3c(c(C)c(C(=O)NC4CCN(C)CC4)c2)[nH]c2ncc(C)cc32)ccc1	8.39	-6.01	1.36	literature	S(=O)(=O)(CC)c1cc(-c2c3c(c(C)c(C(=O)NC4CCN(C)CC4)c2)[nH]c2ncc(C)cc32)ccc1	4.722	95.16	504.655	95.16	1
EGFR	EGFR_30362749	Fluorescent ligand-binding assay	J Am Chem Soc.	Binding Kinetics Survey of the Drugged Kinome	30362749	Kinase	NA	TG 100713	Oc1cc(-c2nc3c(N)nc(N)nc3nc2)ccc1	5.63	-4.09	1.53	literature	Oc1cc(-c2nc3c(N)nc(N)nc3nc2)ccc1	0.58559	123.83	254.253	123.83	0
EGFR	EGFR_30362749	Fluorescent ligand-binding assay	J Am Chem Soc.	Binding Kinetics Survey of the Drugged Kinome	30362749	Kinase	NA	TG100-115	Oc1cc(-c2c(-c3cc(O)ccc3)nc3nc(N)nc(N)c3n2)ccc1	5.8	-4.45	1.35	literature	Oc1cc(-c2c(-c3cc(O)ccc3)nc3nc(N)nc(N)c3n2)ccc1	2.23459	144.06	346.35	144.06	2
EGFR	EGFR_30362749	Fluorescent ligand-binding assay	J Am Chem Soc.	Binding Kinetics Survey of the Drugged Kinome	30362749	Kinase	NA	TG101209	S(=O)(=O)(NC(C)(C)C)c1cc(Nc2c(C)cnc(Nc3ccc(N4CCN(C)CC4)cc3)n2)ccc1	6.33	-4.9	1.43	literature	S(=O)(=O)(NC(C)(C)C)c1cc(Nc2c(C)cnc(Nc3ccc(N4CCN(C)CC4)cc3)n2)ccc1	3.143	102.49	509.679	102.49	0
EGFR	EGFR_30362749	Fluorescent ligand-binding assay	J Am Chem Soc.	Binding Kinetics Survey of the Drugged Kinome	30362749	Kinase	NA	TG101348 (SAR302503)	S(=O)(=O)(NC(C)(C)C)c1cc(Nc2c(C)cnc(Nc3ccc(OCCN4CCCC4)cc3)n2)ccc1	5.87	-4.25	1.61	literature	S(=O)(=O)(NC(C)(C)C)c1cc(Nc2c(C)cnc(Nc3ccc(OCCN4CCCC4)cc3)n2)ccc1	4.068	108.48	524.69	108.48	3
EGFR	EGFR_30362749	Fluorescent ligand-binding assay	J Am Chem Soc.	Binding Kinetics Survey of the Drugged Kinome	30362749	Kinase	NA	TPCA-1	Fc1ccc(-c2sc(NC(=O)N)c(C(=O)N)c2)cc1	5.96	-4.62	1.33	literature	Fc1ccc(-c2sc(NC(=O)N)c(C(=O)N)c2)cc1	1.318	98.21	279.295	98.21	0
EGFR	EGFR_30362749	Fluorescent ligand-binding assay	J Am Chem Soc.	Binding Kinetics Survey of the Drugged Kinome	30362749	Kinase	NA	TWS119	O(c1ncnc2[nH]c(-c3cc(N)ccc3)cc12)c1cc(O)ccc1	7.91	-6.19	1.74	literature	O(c1ncnc2[nH]c(-c3cc(N)ccc3)cc12)c1cc(O)ccc1	3.011	97.05	318.336	97.05	0
EGFR	EGFR_30362749	Fluorescent ligand-binding assay	J Am Chem Soc.	Binding Kinetics Survey of the Drugged Kinome	30362749	Kinase	NA	Tie2 kinase inhibitor	[SH0](=O)(C)c1ccc(-c2[nH]c(c(-c3cc4c(cc(OC)cc4)cc3)n2)-c2ccncc2)cc1	6.14	-4.62	1.51	literature	[SH0](=O)(C)c1ccc(-c2[nH]c(c(-c3cc4c(cc(OC)cc4)cc3)n2)-c2ccncc2)cc1	3.936	87.08	439.539	67.87
EGFR	EGFR_30362749	Fluorescent ligand-binding assay	J Am Chem Soc.	Binding Kinetics Survey of the Drugged Kinome	30362749	Kinase	NA	Tivozanib (AV-951)	Clc1c(NC(=O)Nc2noc(C)c2)ccc(Oc2c3c(ncc2)cc(OC)c(OC)c3)c1	6.67	-5.19	1.49	literature	Clc1c(NC(=O)Nc2noc(C)c2)ccc(Oc2c3c(ncc2)cc(OC)c(OC)c3)c1	3.61574	107.74	454.87	107.74	3
EGFR	EGFR_30362749	Fluorescent ligand-binding assay	J Am Chem Soc.	Binding Kinetics Survey of the Drugged Kinome	30362749	Kinase	NA	Torin 1	FC(F)(F)c1c(N2CCN(C(=O)CC)CC2)ccc(N2C(=O)C=Cc3c2c2c(nc3)ccc(-c3cnc4c(c3)cccc4)c2)c1	5.03	-3.61	1.42	literature	FC(F)(F)c1c(N2CCN(C(=O)CC)CC2)ccc(N2C(=O)C=Cc3c2c2c(nc3)ccc(-c3cnc4c(c3)cccc4)c2)c1	6.27576	69.64	607.636	71.33	0
EGFR	EGFR_30362749	Fluorescent ligand-binding assay	J Am Chem Soc.	Binding Kinetics Survey of the Drugged Kinome	30362749	Kinase	NA	Torin 2	FC(F)(F)c1cc(N2C(=O)C=Cc3c2c2c(nc3)ccc(-c3cnc(N)cc3)c2)ccc1	5.16	-3.52	1.44	literature	FC(F)(F)c1cc(N2C(=O)C=Cc3c2c2c(nc3)ccc(-c3cnc(N)cc3)c2)ccc1	5.05176	72.11	432.405	73.8	0
EGFR	EGFR_30362749	Fluorescent ligand-binding assay	J Am Chem Soc.	Binding Kinetics Survey of the Drugged Kinome	30362749	Kinase	NA	VX-680 (MK-0457 - Tozasertib)	S(c1nc(Nc2n[nH]c(C)c2)cc(N2CCN(C)CC2)n1)c1ccc(NC(=O)C2CC2)cc1	5.12	-3.7	1.41	literature	S(c1nc(Nc2n[nH]c(C)c2)cc(N2CCN(C)CC2)n1)c1ccc(NC(=O)C2CC2)cc1	2.586	102.07	464.598	102.07	2
EGFR	EGFR_30362749	Fluorescent ligand-binding assay	J Am Chem Soc.	Binding Kinetics Survey of the Drugged Kinome	30362749	Kinase	NA	Vemurafenib (PLX4032)	Clc1ccc(-c2cnc3[nH]cc(C(=O)c4c(F)c(NS(=O)(=O)CCC)ccc4F)c3c2)cc1	5.63	-3.26	1.74	literature	Clc1ccc(-c2cnc3[nH]cc(C(=O)c4c(F)c(NS(=O)(=O)CCC)ccc4F)c3c2)cc1	5.54	91.92	489.93	91.92	4
EGFR	EGFR_30362749	Fluorescent ligand-binding assay	J Am Chem Soc.	Binding Kinetics Survey of the Drugged Kinome	30362749	Kinase	NA	WAY-600	C(N1CCC(n2ncc3c(N4CCOCC4)nc(-c4cc5c([nH]cc5)cc4)nc23)CC1)c1cnccc1	5.17	-3.79	1.39	literature	C(N1CCC(n2ncc3c(N4CCOCC4)nc(-c4cc5c([nH]cc5)cc4)nc23)CC1)c1cnccc1	2.55153	87.99	494.603	87.99	0
EGFR	EGFR_30362749	Fluorescent ligand-binding assay	J Am Chem Soc.	Binding Kinetics Survey of the Drugged Kinome	30362749	Kinase	NA	WHI-P154	Brc1c(O)ccc(Nc2ncnc3c2cc(OC)c(OC)c3)c1	9	-7.29	1.72	literature	Brc1c(O)ccc(Nc2ncnc3c2cc(OC)c(OC)c3)c1	3.00974	76.5	376.21	76.5	0
EGFR	EGFR_30362749	Fluorescent ligand-binding assay	J Am Chem Soc.	Binding Kinetics Survey of the Drugged Kinome	30362749	Kinase	NA	XL-184 (Cabozantinib)	Fc1ccc(NC(=O)C2(C(=O)Nc3ccc(Oc4c5c(ncc4)cc(OC)c(OC)c5)cc3)CC2)cc1	5.88	-4.47	1.41	literature	Fc1ccc(NC(=O)C2(C(=O)Nc3ccc(Oc4c5c(ncc4)cc(OC)c(OC)c5)cc3)CC2)cc1	4.52074	98.78	501.514	98.78	4
EGFR	EGFR_30362749	Fluorescent ligand-binding assay	J Am Chem Soc.	Binding Kinetics Survey of the Drugged Kinome	30362749	Kinase	NA	ZM-447439	O=C(Nc1ccc(Nc2ncnc3c2cc(OC)c(OCCCN2CCOCC2)c3)cc1)c1ccccc1	7.62	-6.31	1.37	literature	O=C(Nc1ccc(Nc2ncnc3c2cc(OC)c(OCCCN2CCOCC2)c3)cc1)c1ccccc1	3.32274	97.84	513.598	97.84	0
FAK	FAK_30362749	Fluorescent ligand-binding assay	J Am Chem Soc.	Binding Kinetics Survey of the Drugged Kinome	30362749	Kinase	NA	A-674563	O(C[C@@H](N)Cc1ccccc1)c1cc(-c2cc3c(C)n[nH]c3cc2)cnc1	5.63	-4.14	1.49	literature	O(C[C@@H](N)Cc1ccccc1)c1cc(-c2cc3c(C)n[nH]c3cc2)cnc1	3.865	76.82	358.445	76.82	0
FAK	FAK_30362749	Fluorescent ligand-binding assay	J Am Chem Soc.	Binding Kinetics Survey of the Drugged Kinome	30362749	Kinase	NA	AEE788 (NVP-AEE788)	N([C@H](C)c1ccccc1)c1ncnc2[nH]c(-c3ccc(CN4CCN(CC)CC4)cc3)cc12	5.58	-4.88	0.72	literature	N([C@H](C)c1ccccc1)c1ncnc2[nH]c(-c3ccc(CN4CCN(CC)CC4)cc3)cc12	4.119	60.08	440.595	60.08	0
FAK	FAK_30362749	Fluorescent ligand-binding assay	J Am Chem Soc.	Binding Kinetics Survey of the Drugged Kinome	30362749	Kinase	NA	AMG458	O=C(Nc1ncc(Oc2c3c(ncc2)cc(OC)cc3)cc1)C=1C(=O)N(N(CC(O)(C)C)C=1C)c1ccccc1	5.88	-4.15	1.73	literature	O=C(Nc1ncc(Oc2c3c(ncc2)cc(OC)cc3)cc1)C=1C(=O)N(N(CC(O)(C)C)C=1C)c1ccccc1	3.265	117.12	539.592	120.5	0
FAK	FAK_30362749	Fluorescent ligand-binding assay	J Am Chem Soc.	Binding Kinetics Survey of the Drugged Kinome	30362749	Kinase	NA	AT9283	O=C(Nc1c(-c2[nH]c3c(n2)cc(CN2CCOCC2)cc3)n[nH]c1)NC1CC1	6.76	-5.47	1.29	literature	O=C(Nc1c(-c2[nH]c3c(n2)cc(CN2CCOCC2)cc3)n[nH]c1)NC1CC1	1.13706	110.96	381.44	110.96
FAK	FAK_30362749	Fluorescent ligand-binding assay	J Am Chem Soc.	Binding Kinetics Survey of the Drugged Kinome	30362749	Kinase	NA	AZ 960	Fc1c(Nc2n[nH]c(C)c2)nc(N[C@@H](C)c2ccc(F)cc2)c(C#N)c1	8.66	-6.74	1.93	literature	Fc1c(Nc2n[nH]c(C)c2)nc(N[C@@H](C)c2ccc(F)cc2)c(C#N)c1	3.894	89.42	354.364	89.42	0
FAK	FAK_30362749	Fluorescent ligand-binding assay	J Am Chem Soc.	Binding Kinetics Survey of the Drugged Kinome	30362749	Kinase	NA	AZD4547	O=C(Nc1n[nH]c(CCc2cc(OC)cc(OC)c2)c1)c1ccc(N2C[C@@H](C)N[C@@H](C)C2)cc1	6.55	-5.49	1.07	literature	O=C(Nc1n[nH]c(CCc2cc(OC)cc(OC)c2)c1)c1ccc(N2C[C@@H](C)N[C@@H](C)C2)cc1	3.948	91.51	463.582	91.51	2
FAK	FAK_30362749	Fluorescent ligand-binding assay	J Am Chem Soc.	Binding Kinetics Survey of the Drugged Kinome	30362749	Kinase	NA	AZD5438	S(=O)(=O)(C)c1ccc(Nc2nc(-c3n(C(C)C)c(C)nc3)ccn2)cc1	6.31	-5.09	1.22	literature	S(=O)(=O)(C)c1ccc(Nc2nc(-c3n(C(C)C)c(C)nc3)ccn2)cc1	1.81453	89.77	371.465	89.77	0
FAK	FAK_30362749	Fluorescent ligand-binding assay	J Am Chem Soc.	Binding Kinetics Survey of the Drugged Kinome	30362749	Kinase	NA	AZD7762	Fc1cc(-c2sc(C(=O)N[C@@H]3CNCCC3)c(NC(=O)N)c2)ccc1	7.79	-6.83	0.96	literature	Fc1cc(-c2sc(C(=O)N[C@@H]3CNCCC3)c(NC(=O)N)c2)ccc1	1.64	96.25	362.429	96.25	0
FAK	FAK_30362749	Fluorescent ligand-binding assay	J Am Chem Soc.	Binding Kinetics Survey of the Drugged Kinome	30362749	Kinase	NA	Aurora A Inhibitor I	Clc1c(NC(=O)c2ccc(Nc3c(F)cnc(Nc4ccc(CC(=O)N5CCN(CC)CC5)cc4)n3)cc2)cccc1	6.27	-5	1.27	literature	Clc1c(NC(=O)c2ccc(Nc3c(F)cnc(Nc4ccc(CC(=O)N5CCN(CC)CC5)cc4)n3)cc2)cccc1	4.209	102.49	588.087	102.49	0
FAK	FAK_30362749	Fluorescent ligand-binding assay	J Am Chem Soc.	Binding Kinetics Survey of the Drugged Kinome	30362749	Kinase	NA	Axitinib	S(c1c(C(=O)NC)cccc1)c1cc2[nH]nc(/C=C/c3ncccc3)c2cc1	5.6	-4.42	1.18	literature	S(c1c(C(=O)NC)cccc1)c1cc2[nH]nc(/C=C/c3ncccc3)c2cc1	4.643	70.67	386.479	70.67	0
FAK	FAK_30362749	Fluorescent ligand-binding assay	J Am Chem Soc.	Binding Kinetics Survey of the Drugged Kinome	30362749	Kinase	NA	BEZ235 (NVP-BEZ235)	O=C1N(C)c2c(N1c1ccc(C(C#N)(C)C)cc1)c1c(nc2)ccc(-c2cnc3c(c2)cccc3)c1	5.51	-4.02	1.5	literature	O=C1N(C)c2c(N1c1ccc(C(C#N)(C)C)cc1)c1c(nc2)ccc(-c2cnc3c(c2)cccc3)c1	6.131	73.12	469.548	76.5	0
FAK	FAK_30362749	Fluorescent ligand-binding assay	J Am Chem Soc.	Binding Kinetics Survey of the Drugged Kinome	30362749	Kinase	NA	BGJ398 (NVP-BGJ398)	Clc1c(NC(=O)N(C)c2ncnc(Nc3ccc(N4CCN(CC)CC4)cc3)c2)c(Cl)c(OC)cc1OC	5.6	-4.35	1.29	literature	Clc1c(NC(=O)N(C)c2ncnc(Nc3ccc(N4CCN(CC)CC4)cc3)c2)c(Cl)c(OC)cc1OC	3.451	95.09	560.486	95.09	3
FAK	FAK_30362749	Fluorescent ligand-binding assay	J Am Chem Soc.	Binding Kinetics Survey of the Drugged Kinome	30362749	Kinase	NA	BI 2536	O=C(NC1CCN(C)CC1)c1cc(OC)c(Nc2nc3N([C@H](CC)C(=O)N(C)c3cn2)C2CCCC2)cc1	7.3	-6.08	1.22	literature	O=C(NC1CCN(C)CC1)c1cc(OC)c(Nc2nc3N([C@H](CC)C(=O)N(C)c3cn2)C2CCCC2)cc1	3.039	102.93	521.666	102.93	0
FAK	FAK_30362749	Fluorescent ligand-binding assay	J Am Chem Soc.	Binding Kinetics Survey of the Drugged Kinome	30362749	Kinase	NA	BI6727 (Volasertib)	O=C(NC1CCC(N2CCN(CC3CC3)CC2)CC1)c1cc(OC)c(Nc2nc3N(C(C)C)[C@H](CC)C(=O)N(C)c3cn2)cc1	7.11	-5.82	1.49	literature	O=C(NC1CCC(N2CCN(CC3CC3)CC2)CC1)c1cc(OC)c(Nc2nc3N(C(C)C)[C@H](CC)C(=O)N(C)c3cn2)cc1	3.654	106.17	618.827	106.17	0
FAK	FAK_30362749	Fluorescent ligand-binding assay	J Am Chem Soc.	Binding Kinetics Survey of the Drugged Kinome	30362749	Kinase	NA	BIBF1120 (Vargatef)	O=C(N(C)c1ccc(N/C(/c2ccccc2)=C/2\C(=O)Nc3c\2ccc(C(=O)OC)c3)cc1)CN1CCN(C)CC1	6.16	-4.88	1.28	literature	O=C(N(C)c1ccc(N/C(/c2ccccc2)=C/2\C(=O)Nc3c\2ccc(C(=O)OC)c3)cc1)CN1CCN(C)CC1	3.507	94.22	539.636	94.22	0
FAK	FAK_30362749	Fluorescent ligand-binding assay	J Am Chem Soc.	Binding Kinetics Survey of the Drugged Kinome	30362749	Kinase	NA	BMS 794833	Clc1c(N)nccc1Oc1c(F)cc(NC(=O)C=2C(=O)C(c3ccc(F)cc3)=CNC=2)cc1	5.9	-4.33	1.58	literature	Clc1c(N)nccc1Oc1c(F)cc(NC(=O)C=2C(=O)C(c3ccc(F)cc3)=CNC=2)cc1	3.076	106.34	468.847	110.1	0
FAK	FAK_30362749	Fluorescent ligand-binding assay	J Am Chem Soc.	Binding Kinetics Survey of the Drugged Kinome	30362749	Kinase	NA	BMS-265246	Fc1c(C(=O)c2c(OCCCC)c3c([nH]nc3)nc2)c(F)cc(C)c1	5.84	-4.79	1.06	literature	Fc1c(C(=O)c2c(OCCCC)c3c([nH]nc3)nc2)c(F)cc(C)c1	4.48253	67.87	345.349	67.87
FAK	FAK_30362749	Fluorescent ligand-binding assay	J Am Chem Soc.	Binding Kinetics Survey of the Drugged Kinome	30362749	Kinase	NA	BS-181 HCl	N(CCCCCCN)C1=Nc2c(C(C)C)cnn2C(NCc2ccccc2)=C1	5.66	-4.39	1.27	literature	N(CCCCCCN)C1=Nc2c(C(C)C)cnn2C(NCc2ccccc2)=C1	3.834	80.26	380.54	80.27	0
FAK	FAK_30362749	Fluorescent ligand-binding assay	J Am Chem Soc.	Binding Kinetics Survey of the Drugged Kinome	30362749	Kinase	NA	BX-795	Ic1c(NCCCNC(=O)c2sccc2)nc(Nc2cc(NC(=O)N3CCCC3)ccc2)nc1	7.05	-6.13	0.92	literature	Ic1c(NCCCNC(=O)c2sccc2)nc(Nc2cc(NC(=O)N3CCCC3)ccc2)nc1	3.106	111.28	591.478	111.28	0
FAK	FAK_30362749	Fluorescent ligand-binding assay	J Am Chem Soc.	Binding Kinetics Survey of the Drugged Kinome	30362749	Kinase	NA	BX-912	Brc1c(NCCc2[nH]cnc2)nc(Nc2cc(NC(=O)N3CCCC3)ccc2)nc1	7.48	-6.33	1.15	literature	Brc1c(NCCc2[nH]cnc2)nc(Nc2cc(NC(=O)N3CCCC3)ccc2)nc1	1.234	110.86	471.363	110.86	0
FAK	FAK_30362749	Fluorescent ligand-binding assay	J Am Chem Soc.	Binding Kinetics Survey of the Drugged Kinome	30362749	Kinase	NA	Barasertib (AZD1152-HQPA)	P(=O)(OCCN(CCCOc1cc2ncnc(Nc3[nH]nc(CC(=O)Nc4cc(F)ccc4)c3)c2cc1)CC)(O)O	5.34	-3.41	1.93	literature	P(=O)(OCCN(CCCOc1cc2ncnc(Nc3[nH]nc(CC(=O)Nc4cc(F)ccc4)c3)c2cc1)CC)(O)O	1.886	174.82	587.549	174.82
FAK	FAK_30362749	Fluorescent ligand-binding assay	J Am Chem Soc.	Binding Kinetics Survey of the Drugged Kinome	30362749	Kinase	NA	Baricitinib (LY3009104 - incb28050)	S(=O)(=O)(CC)N1CC(CC#N)(n2ncc(-c3ncnc4[nH]ccc34)c2)C1	5.22	-3.94	1.28	literature	S(=O)(=O)(CC)N1CC(CC#N)(n2ncc(-c3ncnc4[nH]ccc34)c2)C1	-1.528	120.56	371.425	120.56	4
FAK	FAK_30362749	Fluorescent ligand-binding assay	J Am Chem Soc.	Binding Kinetics Survey of the Drugged Kinome	30362749	Kinase	NA	Bosutinib (SKI-606)	Clc1c(OC)cc(Nc2c(C#N)cnc3c2cc(OC)c(OCCCN2CCN(C)CC2)c3)c(Cl)c1	6.56	-5.08	1.48	literature	Clc1c(OC)cc(Nc2c(C#N)cnc3c2cc(OC)c(OCCCN2CCN(C)CC2)c3)c(Cl)c1	3.93474	82.88	530.456	82.88	4
FAK	FAK_30362749	Fluorescent ligand-binding assay	J Am Chem Soc.	Binding Kinetics Survey of the Drugged Kinome	30362749	Kinase	NA	CEP33779	S(=O)(=O)(C)c1ccc(C=2c3n(nc(Nc4cc(N5CCN(C)CC5)ccc4)n3)C=CC=2)cc1	5.98	-4.98	1	literature	S(=O)(=O)(C)c1ccc(C=2c3n(nc(Nc4cc(N5CCN(C)CC5)ccc4)n3)C=CC=2)cc1	1.624	83.36	462.578	82.84	0
FAK	FAK_30362749	Fluorescent ligand-binding assay	J Am Chem Soc.	Binding Kinetics Survey of the Drugged Kinome	30362749	Kinase	NA	CH5424802	O=C1c2c3c([nH]c2C(C)(C)c2c1cc(CC)c(N1CCC(N4CCOCC4)CC1)c2)cc(C#N)cc3	7.14	-6.75	0.49	literature	O=C1c2c3c([nH]c2C(C)(C)c2c1cc(CC)c(N1CCC(N4CCOCC4)CC1)c2)cc(C#N)cc3	5.589	72.36	482.628	72.36	4
FAK	FAK_30362749	Fluorescent ligand-binding assay	J Am Chem Soc.	Binding Kinetics Survey of the Drugged Kinome	30362749	Kinase	NA	CHIR-124	Clc1cc2C(N[C@H]3C4CCN(C3)CC4)=C(c3[nH]c4c(n3)cccc4)C(=O)Nc2cc1	5.66	-4.43	1.28	literature	Clc1cc2C(N[C@H]3C4CCN(C3)CC4)=C(c3[nH]c4c(n3)cccc4)C(=O)Nc2cc1	3.375	73.05	419.916	76.81	0
FAK	FAK_30362749	Fluorescent ligand-binding assay	J Am Chem Soc.	Binding Kinetics Survey of the Drugged Kinome	30362749	Kinase	NA	CP 673451	O(CCOc1cc2ncn(-c3nc4c(N5CCC(N)CC5)cccc4cc3)c2cc1)C	5.2	-3.08	2.12	literature	O(CCOc1cc2ncn(-c3nc4c(N5CCC(N)CC5)cccc4cc3)c2cc1)C	3.25174	78.43	417.513	78.43	0
FAK	FAK_30362749	Fluorescent ligand-binding assay	J Am Chem Soc.	Binding Kinetics Survey of the Drugged Kinome	30362749	Kinase	NA	CYC116	N(c1nc(-c2c(C)nc(N)s2)ccn1)c1ccc(N2CCOCC2)cc1	7.14	-5.92	1.21	literature	N(c1nc(-c2c(C)nc(N)s2)ccn1)c1ccc(N2CCOCC2)cc1	1.126	89.19	368.465	89.19	1
FAK	FAK_30362749	Fluorescent ligand-binding assay	J Am Chem Soc.	Binding Kinetics Survey of the Drugged Kinome	30362749	Kinase	NA	Crenolanib (CP-868596)	O(CC1(C)COC1)c1cc2ncn(-c3nc4c(N5CCC(N)CC5)cccc4cc3)c2cc1	5.08	-3.09	2.02	literature	O(CC1(C)COC1)c1cc2ncn(-c3nc4c(N5CCC(N)CC5)cccc4cc3)c2cc1	3.834	78.43	443.551	78.43	3
FAK	FAK_30362749	Fluorescent ligand-binding assay	J Am Chem Soc.	Binding Kinetics Survey of the Drugged Kinome	30362749	Kinase	NA	Cyt387	O=C(NCC#N)c1ccc(-c2nc(Nc3ccc(N4CCOCC4)cc3)ncc2)cc1	6.03	-4.89	1.14	literature	O=C(NCC#N)c1ccc(-c2nc(Nc3ccc(N4CCOCC4)cc3)ncc2)cc1	1.468	103.17	414.469	103.17	3
FAK	FAK_30362749	Fluorescent ligand-binding assay	J Am Chem Soc.	Binding Kinetics Survey of the Drugged Kinome	30362749	Kinase	NA	Dabrafenib (GSK2118436)	S(=O)(=O)(Nc1c(F)c(-c2c(-c3nc(N)ncc3)sc(C(C)(C)C)n2)ccc1)c1c(F)cccc1F	5.45	-3.67	1.79	literature	S(=O)(=O)(Nc1c(F)c(-c2c(-c3nc(N)ncc3)sc(C(C)(C)C)n2)ccc1)c1c(F)cccc1F	4.291	110.86	519.572	110.86	4
FAK	FAK_30362749	Fluorescent ligand-binding assay	J Am Chem Soc.	Binding Kinetics Survey of the Drugged Kinome	30362749	Kinase	NA	Danusertib (PHA-739358)	O=C([C@H](OC)c1ccccc1)N1Cc2c(NC(=O)c3ccc(N4CCN(C)CC4)cc3)n[nH]c2C1	7.1	-4.95	2.15	literature	O=C([C@H](OC)c1ccccc1)N1Cc2c(NC(=O)c3ccc(N4CCN(C)CC4)cc3)n[nH]c2C1	2.235	93.8	474.565	93.8	0
FAK	FAK_30362749	Fluorescent ligand-binding assay	J Am Chem Soc.	Binding Kinetics Survey of the Drugged Kinome	30362749	Kinase	NA	Dinaciclib (SCH727965)	OCC[C@H]1N(C2=Nc3c(CC)cnn3C(NCc3c[n+]([O-])ccc3)=C2)CCCC1	5.2	-3.23	1.86	literature	OCC[C@H]1N(C2=Nc3c(CC)cnn3C(NCc3c[n+]([O-])ccc3)=C2)CCCC1	2.707	91.14	396.495	92.63	3
FAK	FAK_30362749	Fluorescent ligand-binding assay	J Am Chem Soc.	Binding Kinetics Survey of the Drugged Kinome	30362749	Kinase	NA	Dovitinib (TKI-258)	Fc1c2C(N)=C(c3[nH]c4c(n3)ccc(N3CCN(C)CC3)c4)C(=O)Nc2ccc1	5.81	-5.06	0.75	literature	Fc1c2C(N)=C(c3[nH]c4c(n3)ccc(N3CCN(C)CC3)c4)C(=O)Nc2ccc1	1.59	90.28	392.438	94.04	3
FAK	FAK_30362749	Fluorescent ligand-binding assay	J Am Chem Soc.	Binding Kinetics Survey of the Drugged Kinome	30362749	Kinase	NA	E7080 (Lenvatinib)	Clc1c(NC(=O)NC2CC2)ccc(Oc2c3c(ncc2)cc(OC)c(C(=O)N)c3)c1	5.05	-3.11	1.94	literature	Clc1c(NC(=O)NC2CC2)ccc(Oc2c3c(ncc2)cc(OC)c(C(=O)N)c3)c1	2.902	115.57	426.86	115.57	0
FAK	FAK_30362749	Fluorescent ligand-binding assay	J Am Chem Soc.	Binding Kinetics Survey of the Drugged Kinome	30362749	Kinase	NA	ENMD-2076	N(c1nc(/C=C/c2ccccc2)nc(N2CCN(C)CC2)c1)c1n[nH]c(C)c1	5.92	-4.52	1.4	literature	N(c1nc(/C=C/c2ccccc2)nc(N2CCN(C)CC2)c1)c1n[nH]c(C)c1	2.969	72.97	375.48	72.97	0
FAK	FAK_30362749	Fluorescent ligand-binding assay	J Am Chem Soc.	Binding Kinetics Survey of the Drugged Kinome	30362749	Kinase	NA	Enzastaurin (LY317615)	O=C1C(c2c3c(n(C)c2)cccc3)=C(c2c3c(n(C4CCN(Cc5ncccc5)CC4)c2)cccc3)C(=O)N1	5.09	-2.94	2.16	literature	O=C1C(c2c3c(n(C)c2)cccc3)=C(c2c3c(n(C4CCN(Cc5ncccc5)CC4)c2)cccc3)C(=O)N1	5.661	72.16	515.617	72.16	3
FAK	FAK_30362749	Fluorescent ligand-binding assay	J Am Chem Soc.	Binding Kinetics Survey of the Drugged Kinome	30362749	Kinase	NA	Flavopiridol HCl	Clc1c(C=2Oc3c([C@@H]4[C@H](O)CN(C)CC4)c(O)cc(O)c3C(=O)C=2)cccc1	5.53	-4.44	1.11	literature	Clc1c(C=2Oc3c([C@@H]4[C@H](O)CN(C)CC4)c(O)cc(O)c3C(=O)C=2)cccc1	2.902	90.23	401.846	94.14	0
FAK	FAK_30362749	Fluorescent ligand-binding assay	J Am Chem Soc.	Binding Kinetics Survey of the Drugged Kinome	30362749	Kinase	NA	Foretinib (GSK1363089 - XL880)	Fc1c(Oc2c3c(ncc2)cc(OCCCN2CCOCC2)c(OC)c3)ccc(NC(=O)C2(C(=O)Nc3ccc(F)cc3)CC2)c1	6.93	-5.38	1.56	literature	Fc1c(Oc2c3c(ncc2)cc(OCCCN2CCOCC2)c(OC)c3)ccc(NC(=O)C2(C(=O)Nc3ccc(F)cc3)CC2)c1	4.59374	111.25	632.664	111.25	2
FAK	FAK_30362749	Fluorescent ligand-binding assay	J Am Chem Soc.	Binding Kinetics Survey of the Drugged Kinome	30362749	Kinase	NA	GDC-0941	S(=O)(=O)(C)N1CCN(Cc2sc3c(N4CCOCC4)nc(-c4c5c([nH]nc5)ccc4)nc3c2)CC1	5.33	-3.37	1.96	literature	S(=O)(=O)(C)N1CCN(Cc2sc3c(N4CCOCC4)nc(-c4c5c([nH]nc5)ccc4)nc3c2)CC1	0.888	107.55	513.647	107.55	0
FAK	FAK_30362749	Fluorescent ligand-binding assay	J Am Chem Soc.	Binding Kinetics Survey of the Drugged Kinome	30362749	Kinase	NA	GDC-0980 (RG7422)	O=C([C@@H](O)C)N1CCN(Cc2c(C)c3nc(-c4cnc(N)nc4)nc(N4CCOCC4)c3s2)CC1	5.27	-3.52	1.74	literature	O=C([C@@H](O)C)N1CCN(Cc2c(C)c3nc(-c4cnc(N)nc4)nc(N4CCOCC4)c3s2)CC1	-1.016	133.83	498.612	133.83	2
FAK	FAK_30362749	Fluorescent ligand-binding assay	J Am Chem Soc.	Binding Kinetics Survey of the Drugged Kinome	30362749	Kinase	NA	GSK1070916	O=C(N(C)C)Nc1ccc(-c2c(-c3c4c([nH]c(-c5cc(CN(C)C)ccc5)c4)ncc3)cn(CC)n2)cc1	5.08	-3.06	2.04	literature	O=C(N(C)C)Nc1ccc(-c2c(-c3c4c([nH]c(-c5cc(CN(C)C)ccc5)c4)ncc3)cn(CC)n2)cc1	4.46	82.08	507.642	82.08	1
FAK	FAK_30362749	Fluorescent ligand-binding assay	J Am Chem Soc.	Binding Kinetics Survey of the Drugged Kinome	30362749	Kinase	NA	GSK1838705A	Fc1c(C(=O)NC)c(Nc2nc(Nc3c(OC)cc4c(N(C(=O)CN(C)C)CC4)c3)nc3[nH]ccc23)ccc1	7.25	-5.72	1.54	literature	Fc1c(C(=O)NC)c(Nc2nc(Nc3c(OC)cc4c(N(C(=O)CN(C)C)CC4)c3)nc3[nH]ccc23)ccc1	2.101	127.51	532.58	127.51	0
FAK	FAK_30362749	Fluorescent ligand-binding assay	J Am Chem Soc.	Binding Kinetics Survey of the Drugged Kinome	30362749	Kinase	NA	Golvatinib (E7050)	Fc1c(NC(=O)C2(C(=O)Nc3ccc(F)cc3)CC2)ccc(Oc2cc(NC(=O)N3CCC(N4CCN(C)CC4)CC3)ncc2)c1	5.88	-4.7	1.18	literature	Fc1c(NC(=O)C2(C(=O)Nc3ccc(F)cc3)CC2)ccc(Oc2cc(NC(=O)N3CCC(N4CCN(C)CC4)CC3)ncc2)c1	3.17	119.14	633.7	119.14	0
FAK	FAK_30362749	Fluorescent ligand-binding assay	J Am Chem Soc.	Binding Kinetics Survey of the Drugged Kinome	30362749	Kinase	NA	Hesperadin	S(=O)(=O)(Nc1cc2/C(=C(/Nc3ccc(CN4CCCCC4)cc3)\c3ccccc3)/C(=O)Nc2cc1)CC	8.4	-6.93	1.47	literature	S(=O)(=O)(Nc1cc2/C(=C(/Nc3ccc(CN4CCCCC4)cc3)\c3ccccc3)/C(=O)Nc2cc1)CC	5.433	90.54	516.666	90.54	0
FAK	FAK_30362749	Fluorescent ligand-binding assay	J Am Chem Soc.	Binding Kinetics Survey of the Drugged Kinome	30362749	Kinase	NA	INK 128 (MLN0128)	Nc1oc2c(n1)cc(-c1nn(C(C)C)c3ncnc(N)c13)cc2	5.2	-2.89	2.31	literature	Nc1oc2c(n1)cc(-c1nn(C(C)C)c3ncnc(N)c13)cc2	0.97853	121.67	309.333	121.67	0
FAK	FAK_30362749	Fluorescent ligand-binding assay	J Am Chem Soc.	Binding Kinetics Survey of the Drugged Kinome	30362749	Kinase	NA	Imatinib (Gleevec)	O=C(Nc1cc(Nc2nc(-c3cnccc3)ccn2)c(C)cc1)c1ccc(CN2CCN(C)CC2)cc1	5.15	-3.52	1.66	literature	O=C(Nc1cc(Nc2nc(-c3cnccc3)ccn2)c(C)cc1)c1ccc(CN2CCN(C)CC2)cc1	2.827	86.28	493.615	86.28	0
FAK	FAK_30362749	Fluorescent ligand-binding assay	J Am Chem Soc.	Binding Kinetics Survey of the Drugged Kinome	30362749	Kinase	NA	JNJ-7706621	S(=O)(=O)(N)c1ccc(Nc2nn(C(=O)c3c(F)cccc3F)c(N)n2)cc1	6.03	-4.9	1.13	literature	S(=O)(=O)(N)c1ccc(Nc2nn(C(=O)c3c(F)cccc3F)c(N)n2)cc1	0.89	145.99	394.362	145.99	0
FAK	FAK_30362749	Fluorescent ligand-binding assay	J Am Chem Soc.	Binding Kinetics Survey of the Drugged Kinome	30362749	Kinase	NA	KW 2449	O=C(N1CCNCC1)c1ccc(/C=C/c2n[nH]c3c2cccc3)cc1	5.75	-4.77	0.98	literature	O=C(N1CCNCC1)c1ccc(/C=C/c2n[nH]c3c2cccc3)cc1	3.087	61.02	332.407	61.02	0
FAK	FAK_30362749	Fluorescent ligand-binding assay	J Am Chem Soc.	Binding Kinetics Survey of the Drugged Kinome	30362749	Kinase	NA	Ki8751	Fc1c(NC(=O)Nc2c(F)cc(Oc3c4c(ncc3)cc(OC)c(OC)c4)cc2)ccc(F)c1	5.25	-3.13	2.12	literature	Fc1c(NC(=O)Nc2c(F)cc(Oc3c4c(ncc3)cc(OC)c(OC)c4)cc2)ccc(F)c1	4.56974	81.71	469.419	81.71	0
FAK	FAK_30362749	Fluorescent ligand-binding assay	J Am Chem Soc.	Binding Kinetics Survey of the Drugged Kinome	30362749	Kinase	NA	LY2784544	Clc1cc(F)c(Cc2c(C)nc3C(CN4CCOCC4)=CC(Nc4n[nH]c(C)c4)=Nn23)cc1	7.76	-6.2	1.56	literature	Clc1cc(F)c(Cc2c(C)nc3C(CN4CCOCC4)=CC(Nc4n[nH]c(C)c4)=Nn23)cc1	3.368	83.36	469.952	83.37	2
FAK	FAK_30362749	Fluorescent ligand-binding assay	J Am Chem Soc.	Binding Kinetics Survey of the Drugged Kinome	30362749	Kinase	NA	Linifanib (ABT-869)	Fc1c(NC(=O)Nc2ccc(-c3c4c(N)n[nH]c4ccc3)cc2)cc(C)cc1	5.27	-4.66	1.51	literature	Fc1c(NC(=O)Nc2ccc(-c3c4c(N)n[nH]c4ccc3)cc2)cc(C)cc1	4.535	95.83	375.407	95.83	3
FAK	FAK_30362749	Fluorescent ligand-binding assay	J Am Chem Soc.	Binding Kinetics Survey of the Drugged Kinome	30362749	Kinase	NA	Linsitinib (OSI-906)	OC1(C)CC(c2n3c(c(-c4cc5nc(-c6ccccc6)ccc5cc4)n2)C(N)=NC=C3)C1	5.14	-3.31	1.83	literature	OC1(C)CC(c2n3c(c(-c4cc5nc(-c6ccccc6)ccc5cc4)n2)C(N)=NC=C3)C1	3.405	89.32	421.504	89.33	0
FAK	FAK_30362749	Fluorescent ligand-binding assay	J Am Chem Soc.	Binding Kinetics Survey of the Drugged Kinome	30362749	Kinase	NA	MGCD-265	S=C(NC(=O)Cc1ccc(F)cc1)Nc1cc(F)c(Oc2c3sc(-c4ncc(CNCCOC)cc4)cc3ncc2)cc1	5.18	-3.08	2.1	literature	S=C(NC(=O)Cc1ccc(F)cc1)Nc1cc(F)c(Oc2c3sc(-c4ncc(CNCCOC)cc4)cc3ncc2)cc1	5.155	129.49	619.717	97.4	2
FAK	FAK_30362749	Fluorescent ligand-binding assay	J Am Chem Soc.	Binding Kinetics Survey of the Drugged Kinome	30362749	Kinase	NA	MK-5108 (VX-689)	Clc1c(F)c(OC2CCC(C(=O)O)(Cc3nc(Nc4sccn4)ccc3)CC2)ccc1	7.51	-7.27	0.28	literature	Clc1c(F)c(OC2CCC(C(=O)O)(Cc3nc(Nc4sccn4)ccc3)CC2)ccc1	4.806	84.34	461.945	84.34	0
FAK	FAK_30362749	Fluorescent ligand-binding assay	J Am Chem Soc.	Binding Kinetics Survey of the Drugged Kinome	30362749	Kinase	NA	MLN8054	Clc1cc2C(c3c(F)cccc3F)=NCc3c(nc(Nc4ccc(C(=O)O)cc4)nc3)-c2cc1	6.26	-4.98	1.31	literature	Clc1cc2C(c3c(F)cccc3F)=NCc3c(nc(Nc4ccc(C(=O)O)cc4)nc3)-c2cc1	5.189	87.47	476.87	87.47	0
FAK	FAK_30362749	Fluorescent ligand-binding assay	J Am Chem Soc.	Binding Kinetics Survey of the Drugged Kinome	30362749	Kinase	NA	MLN8237 (Alisertib)	Clc1cc2C(c3c(F)cccc3OC)=NCc3c(nc(Nc4cc(OC)c(C(=O)O)cc4)nc3)-c2cc1	7.25	-5.65	1.6	literature	Clc1cc2C(c3c(F)cccc3OC)=NCc3c(nc(Nc4cc(OC)c(C(=O)O)cc4)nc3)-c2cc1	4.983	105.93	518.932	105.93	3
FAK	FAK_30362749	Fluorescent ligand-binding assay	J Am Chem Soc.	Binding Kinetics Survey of the Drugged Kinome	30362749	Kinase	NA	Milciclib (PHA-848125)	O=C(NC)c1nn(C)c-2c1C(C)(C)Cc1c-2nc(Nc2ccc(N3CCN(C)CC3)cc2)nc1	6.4	-5.07	1.32	literature	O=C(NC)c1nn(C)c-2c1C(C)(C)Cc1c-2nc(Nc2ccc(N3CCN(C)CC3)cc2)nc1	0.92053	91.21	460.586	91.21	1
FAK	FAK_30362749	Fluorescent ligand-binding assay	J Am Chem Soc.	Binding Kinetics Survey of the Drugged Kinome	30362749	Kinase	NA	NVP-ADW742	O(Cc1ccccc1)c1cc(-c2c3c(N)ncnc3n(C3CC(CN4CCCC4)C3)c2)ccc1	5.15	-3.45	1.71	literature	O(Cc1ccccc1)c1cc(-c2c3c(N)ncnc3n(C3CC(CN4CCCC4)C3)c2)ccc1	5.319	69.2	453.59	69.2	0
FAK	FAK_30362749	Fluorescent ligand-binding assay	J Am Chem Soc.	Binding Kinetics Survey of the Drugged Kinome	30362749	Kinase	NA	NVP-BGT226	FC(F)(F)c1c(N2CCNCC2)ccc(N2C(=O)N(C)c3c2c2c(nc3)ccc(-c3cnc(OC)cc3)c2)c1.O=C(O)/C=C\C(=O)O	5.06	-2.92	2.14	literature	FC(F)(F)c1c(N2CCNCC2)ccc(N2C(=O)N(C)c3c2c2c(nc3)ccc(-c3cnc(OC)cc3)c2)c1	4.03876	73.83	534.542	77.21	2
FAK	FAK_30362749	Fluorescent ligand-binding assay	J Am Chem Soc.	Binding Kinetics Survey of the Drugged Kinome	30362749	Kinase	NA	NVP-BSK805	Fc1c(CN2CCOCC2)c(F)cc(-c2c3nc(-c4cn(C5CCNCC5)nc4)cnc3ccc2)c1	5.13	-3.2	1.94	literature	Fc1c(CN2CCOCC2)c(F)cc(-c2c3nc(-c4cn(C5CCNCC5)nc4)cnc3ccc2)c1	3.38953	68.1	490.558	68.1	0
FAK	FAK_30362749	Fluorescent ligand-binding assay	J Am Chem Soc.	Binding Kinetics Survey of the Drugged Kinome	30362749	Kinase	NA	Neratinib (HKI-272)	Clc1c(OCc2ncccc2)ccc(Nc2c(C#N)cnc3c2cc(NC(=O)/C=C/CN(C)C)c(OCC)c3)c1	5.51	-3.98	1.52	literature	Clc1c(OCc2ncccc2)ccc(Nc2c(C#N)cnc3c2cc(NC(=O)/C=C/CN(C)C)c(OCC)c3)c1	4.3	112.4	557.054	112.4	4
FAK	FAK_30362749	Fluorescent ligand-binding assay	J Am Chem Soc.	Binding Kinetics Survey of the Drugged Kinome	30362749	Kinase	NA	PF-00562271	S(=O)(=O)(N(C)c1c(CNc2c(C(F)(F)F)cnc(Nc3cc4c(NC(=O)C4)cc3)n2)cccn1)C	10.25	-7.22	3.03	literature	S(=O)(=O)(N(C)c1c(CNc2c(C(F)(F)F)cnc(Nc3cc4c(NC(=O)C4)cc3)n2)cccn1)C	1.07576	129.21	507.497	129.21	0
FAK	FAK_30362749	Fluorescent ligand-binding assay	J Am Chem Soc.	Binding Kinetics Survey of the Drugged Kinome	30362749	Kinase	NA	PF-03814735	FC(F)(F)c1c(NC2CCC2)nc(Nc2cc3[C@@H]4N(C(=O)CNC(=O)C)[C@H](c3cc2)CC4)nc1	8.62	-6.92	1.7	literature	FC(F)(F)c1c(NC2CCC2)nc(Nc2cc3[C@@H]4N(C(=O)CNC(=O)C)[C@H](c3cc2)CC4)nc1	2.73576	99.25	474.487	99.25	0
FAK	FAK_30362749	Fluorescent ligand-binding assay	J Am Chem Soc.	Binding Kinetics Survey of the Drugged Kinome	30362749	Kinase	NA	PHA-665752	Clc1c(CS(=O)(=O)c2cc3/C(=C/c4c(C)c(C(=O)N5[C@@H](CN6CCCC6)CCC5)c(C)[nH]4)/C(=O)Nc3cc2)c(Cl)ccc1	6.56	-5.38	1.19	literature	Clc1c(CS(=O)(=O)c2cc3/C(=C/c4c(C)c(C(=O)N5[C@@H](CN6CCCC6)CCC5)c(C)[nH]4)/C(=O)Nc3cc2)c(Cl)ccc1	5.282	102.58	641.62	102.58	0
FAK	FAK_30362749	Fluorescent ligand-binding assay	J Am Chem Soc.	Binding Kinetics Survey of the Drugged Kinome	30362749	Kinase	NA	PHA-680632	O=C(Nc1c(CC)cccc1CC)N1Cc2c(NC(=O)c3ccc(N4CCN(C)CC4)cc3)n[nH]c2C1	7.21	-5.67	1.54	literature	O=C(Nc1c(CC)cccc1CC)N1Cc2c(NC(=O)c3ccc(N4CCN(C)CC4)cc3)n[nH]c2C1	3.374	96.6	501.635	96.6	0
FAK	FAK_30362749	Fluorescent ligand-binding assay	J Am Chem Soc.	Binding Kinetics Survey of the Drugged Kinome	30362749	Kinase	NA	PIK-75	BrC1=Cn2c(/C=N/N(S(=O)(=O)c3c(C)ccc([N+](=O)[O-])c3)C)cnc2C=C1	7.45	-6.58	0.87	literature	BrC1=Cn2c(/C=N/N(S(=O)(=O)c3c(C)ccc([N+](=O)[O-])c3)C)cnc2C=C1	3.093	113.38	452.289	110.18	0
FAK	FAK_30362749	Fluorescent ligand-binding assay	J Am Chem Soc.	Binding Kinetics Survey of the Drugged Kinome	30362749	Kinase	NA	PP-121	Nc1ncnc2n(C3CCCC3)nc(-c3cnc4[nH]ccc4c3)c12	6.39	-5.07	1.32	literature	Nc1ncnc2n(C3CCCC3)nc(-c3cnc4[nH]ccc4c3)c12	1.75553	98.3	319.372	98.3	0
FAK	FAK_30362749	Fluorescent ligand-binding assay	J Am Chem Soc.	Binding Kinetics Survey of the Drugged Kinome	30362749	Kinase	NA	Pazopanib HCl	S(=O)(=O)(N)c1c(C)ccc(Nc2nc(N(C)c3cc4nn(C)c(C)c4cc3)ccn2)c1	6.29	-5.25	1.03	literature	S(=O)(=O)(N)c1c(C)ccc(Nc2nc(N(C)c3cc4nn(C)c(C)c4cc3)ccn2)c1	1.865	119.03	437.528	119.03	4
FAK	FAK_30362749	Fluorescent ligand-binding assay	J Am Chem Soc.	Binding Kinetics Survey of the Drugged Kinome	30362749	Kinase	NA	Pelitinib (EKB-569)	Clc1c(F)ccc(Nc2c(C#N)cnc3c2cc(NC(=O)/C=C/CN(C)C)c(OCC)c3)c1	5.55	-3.92	1.63	literature	Clc1c(F)ccc(Nc2c(C#N)cnc3c2cc(NC(=O)/C=C/CN(C)C)c(OCC)c3)c1	3.98	90.28	467.932	90.28	0
FAK	FAK_30362749	Fluorescent ligand-binding assay	J Am Chem Soc.	Binding Kinetics Survey of the Drugged Kinome	30362749	Kinase	NA	Ponatinib (AP24534)	FC(F)(F)c1c(CN2CCN(C)CC2)ccc(NC(=O)c2cc(C#Cc3n4N=CC=Cc4nc3)c(C)cc2)c1	5.7	-4.33	1.37	literature	FC(F)(F)c1c(CN2CCN(C)CC2)ccc(NC(=O)c2cc(C#Cc3n4N=CC=Cc4nc3)c(C)cc2)c1	4.88476	65.76	532.57	65.77	4
FAK	FAK_30362749	Fluorescent ligand-binding assay	J Am Chem Soc.	Binding Kinetics Survey of the Drugged Kinome	30362749	Kinase	NA	R406	Fc1c(Nc2nc3NC(=O)C(C)(C)Oc3cc2)nc(Nc2cc(OC)c(OC)c(OC)c2)nc1	7.47	-6.21	1.29	literature	Fc1c(Nc2nc3NC(=O)C(C)(C)Oc3cc2)nc(Nc2cc(OC)c(OC)c(OC)c2)nc1	1.87148	128.75	470.461	128.75	2
FAK	FAK_30362749	Fluorescent ligand-binding assay	J Am Chem Soc.	Binding Kinetics Survey of the Drugged Kinome	30362749	Kinase	NA	R788 (Fostamatinib) - prodrug	P(=O)(OCN1C(=O)C(C)(C)Oc2c1nc(Nc1c(F)cnc(Nc3cc(OC)c(OC)c(OC)c3)n1)cc2)(O)O	6.54	-5.46	1.12	literature	P(=O)(OCN1C(=O)C(C)(C)Oc2c1nc(Nc1c(F)cnc(Nc3cc(OC)c(OC)c(OC)c3)n1)cc2)(O)O	0.59748	186.72	580.466	186.72	4
FAK	FAK_30362749	Fluorescent ligand-binding assay	J Am Chem Soc.	Binding Kinetics Survey of the Drugged Kinome	30362749	Kinase	NA	Roscovitine (Seliciclib - CYC202)	OC[C@H](Nc1nc(NCc2ccccc2)c2ncn(C(C)C)c2n1)CC	5.57	-4.75	0.83	literature	OC[C@H](Nc1nc(NCc2ccccc2)c2ncn(C(C)C)c2n1)CC	2.94206	87.89	354.458	87.89	0
FAK	FAK_30362749	Fluorescent ligand-binding assay	J Am Chem Soc.	Binding Kinetics Survey of the Drugged Kinome	30362749	Kinase	NA	Ruxolitinib (INCB018424)	N#CC[C@@H](n1ncc(-c2ncnc3[nH]ccc23)c1)C1CCCC1	5.79	-4.82	0.97	literature	N#CC[C@@H](n1ncc(-c2ncnc3[nH]ccc23)c1)C1CCCC1	1.24	83.18	306.373	83.18	4
FAK	FAK_30362749	Fluorescent ligand-binding assay	J Am Chem Soc.	Binding Kinetics Survey of the Drugged Kinome	30362749	Kinase	NA	SAR131675	O=C(NC)C1=C(N)N(CC)c2nc(C#C[C@@](O)(COC)C)ccc2C1=O	5.15	-2.86	2.31	literature	O=C(NC)C1=C(N)N(CC)c2nc(C#C[C@@](O)(COC)C)ccc2C1=O	0.845	117.78	358.398	119.47	0
FAK	FAK_30362749	Fluorescent ligand-binding assay	J Am Chem Soc.	Binding Kinetics Survey of the Drugged Kinome	30362749	Kinase	NA	SNS-314	Clc1cc(NC(=O)Nc2sc(CCNc3ncnc4c3scc4)cn2)ccc1	6.8	-5.36	1.44	literature	Clc1cc(NC(=O)Nc2sc(CCNc3ncnc4c3scc4)cn2)ccc1	2.83	91.83	430.944	91.83
FAK	FAK_30362749	Fluorescent ligand-binding assay	J Am Chem Soc.	Binding Kinetics Survey of the Drugged Kinome	30362749	Kinase	NA	SP600125	O=C1c2c3c([nH]nc3-c3c1cccc3)ccc2	6.31	-5.28	1.03	literature	O=C1c2c3c([nH]nc3-c3c1cccc3)ccc2	3.233	45.75	220.231	45.75	0
FAK	FAK_30362749	Fluorescent ligand-binding assay	J Am Chem Soc.	Binding Kinetics Survey of the Drugged Kinome	30362749	Kinase	NA	SU11274	Clc1cc(N(S(=O)(=O)c2cc3/C(=C/c4c(C)c(C(=O)N5CCN(C)CC5)c(C)[nH]4)/C(=O)Nc3cc2)C)ccc1	5.58	-4.44	1.14	literature	Clc1cc(N(S(=O)(=O)c2cc3/C(=C/c4c(C)c(C(=O)N5CCN(C)CC5)c(C)[nH]4)/C(=O)Nc3cc2)C)ccc1	2.608	105.82	568.098	105.82	0
FAK	FAK_30362749	Fluorescent ligand-binding assay	J Am Chem Soc.	Binding Kinetics Survey of the Drugged Kinome	30362749	Kinase	NA	Semaxanib (SU5416)	O=C1/C(=C\c2c(C)cc(C)[nH]2)/c2c(N1)cccc2	6.76	-5.36	1.4	literature	O=C1/C(=C\c2c(C)cc(C)[nH]2)/c2c(N1)cccc2	2.562	44.89	238.29	44.89	3
FAK	FAK_30362749	Fluorescent ligand-binding assay	J Am Chem Soc.	Binding Kinetics Survey of the Drugged Kinome	30362749	Kinase	NA	Sotrastaurin (AEB071)	O=C1C(c2nc(N3CCN(C)CC3)nc3c2cccc3)=C(c2c3c([nH]c2)cccc3)C(=O)N1	5.3	-3.82	1.48	literature	O=C1C(c2nc(N3CCN(C)CC3)nc3c2cccc3)=C(c2c3c([nH]c2)cccc3)C(=O)N1	2.127	94.22	438.491	94.22	2
FAK	FAK_30362749	Fluorescent ligand-binding assay	J Am Chem Soc.	Binding Kinetics Survey of the Drugged Kinome	30362749	Kinase	NA	Staurosporine	O(C)[C@@H]1[C@H](NC)C[C@H]2O[C@]1(C)n1c3c4n2c2c(c4c4C(=O)NCc4c3c3c1cccc3)cccc2	8.41	-6.84	1.57	literature	O(C)[C@@H]1[C@H](NC)C[C@H]2O[C@]1(C)n1c3c4n2c2c(c4c4C(=O)NCc4c3c3c1cccc3)cccc2	6.35953	69.45	466.541	69.45	0
FAK	FAK_30362749	Fluorescent ligand-binding assay	J Am Chem Soc.	Binding Kinetics Survey of the Drugged Kinome	30362749	Kinase	NA	Sunitinib Malate (Sutent)	Fc1cc2/C(=C/c3c(C)c(C(=O)NCCN(CC)CC)c(C)[nH]3)/C(=O)Nc2cc1.O=C(O)[C@@H](O)CC(=O)O	7.14	-6.53	0.62	literature	Fc1cc2/C(=C/c3c(C)c(C(=O)NCCN(CC)CC)c(C)[nH]3)/C(=O)Nc2cc1	2.569	77.23	398.482	77.23	0
FAK	FAK_30362749	Fluorescent ligand-binding assay	J Am Chem Soc.	Binding Kinetics Survey of the Drugged Kinome	30362749	Kinase	NA	TAE684 (NVP-TAE684)	Clc1c(Nc2c(S(=O)(=O)C(C)C)cccc2)nc(Nc2c(OC)cc(N3CCC(N4CCN(C)CC4)CC3)cc2)nc1	9.91	-7.19	2.72	literature	Clc1c(Nc2c(S(=O)(=O)C(C)C)cccc2)nc(Nc2c(OC)cc(N3CCC(N4CCN(C)CC4)CC3)cc2)nc1	3.959	102.93	614.215	102.93	0
FAK	FAK_30362749	Fluorescent ligand-binding assay	J Am Chem Soc.	Binding Kinetics Survey of the Drugged Kinome	30362749	Kinase	NA	TAK-901	S(=O)(=O)(CC)c1cc(-c2c3c(c(C)c(C(=O)NC4CCN(C)CC4)c2)[nH]c2ncc(C)cc32)ccc1	7.79	-6.3	1.49	literature	S(=O)(=O)(CC)c1cc(-c2c3c(c(C)c(C(=O)NC4CCN(C)CC4)c2)[nH]c2ncc(C)cc32)ccc1	4.722	95.16	504.655	95.16	1
FAK	FAK_30362749	Fluorescent ligand-binding assay	J Am Chem Soc.	Binding Kinetics Survey of the Drugged Kinome	30362749	Kinase	NA	TG101209	S(=O)(=O)(NC(C)(C)C)c1cc(Nc2c(C)cnc(Nc3ccc(N4CCN(C)CC4)cc3)n2)ccc1	8.24	-6.73	1.51	literature	S(=O)(=O)(NC(C)(C)C)c1cc(Nc2c(C)cnc(Nc3ccc(N4CCN(C)CC4)cc3)n2)ccc1	3.143	102.49	509.679	102.49	0
FAK	FAK_30362749	Fluorescent ligand-binding assay	J Am Chem Soc.	Binding Kinetics Survey of the Drugged Kinome	30362749	Kinase	NA	TG101348 (SAR302503)	S(=O)(=O)(NC(C)(C)C)c1cc(Nc2c(C)cnc(Nc3ccc(OCCN4CCCC4)cc3)n2)ccc1	8.26	-6.75	1.52	literature	S(=O)(=O)(NC(C)(C)C)c1cc(Nc2c(C)cnc(Nc3ccc(OCCN4CCCC4)cc3)n2)ccc1	4.068	108.48	524.69	108.48	3
FAK	FAK_30362749	Fluorescent ligand-binding assay	J Am Chem Soc.	Binding Kinetics Survey of the Drugged Kinome	30362749	Kinase	NA	TPCA-1	Fc1ccc(-c2sc(NC(=O)N)c(C(=O)N)c2)cc1	5.91	-4.91	1	literature	Fc1ccc(-c2sc(NC(=O)N)c(C(=O)N)c2)cc1	1.318	98.21	279.295	98.21	0
FAK	FAK_30362749	Fluorescent ligand-binding assay	J Am Chem Soc.	Binding Kinetics Survey of the Drugged Kinome	30362749	Kinase	NA	TSU-68 (SU6668)	O=C(O)CCc1c(C)c(/C=C/2\C(=O)Nc3c\2cccc3)[nH]c1C	6.15	-4.77	1.38	literature	O=C(O)CCc1c(C)c(/C=C/2\C(=O)Nc3c\2cccc3)[nH]c1C	2.374	82.19	310.353	82.19	0
FAK	FAK_30362749	Fluorescent ligand-binding assay	J Am Chem Soc.	Binding Kinetics Survey of the Drugged Kinome	30362749	Kinase	NA	TWS119	O(c1ncnc2[nH]c(-c3cc(N)ccc3)cc12)c1cc(O)ccc1	5.43	-4.05	1.39	literature	O(c1ncnc2[nH]c(-c3cc(N)ccc3)cc12)c1cc(O)ccc1	3.011	97.05	318.336	97.05	0
FAK	FAK_30362749	Fluorescent ligand-binding assay	J Am Chem Soc.	Binding Kinetics Survey of the Drugged Kinome	30362749	Kinase	NA	Tivozanib (AV-951)	Clc1c(NC(=O)Nc2noc(C)c2)ccc(Oc2c3c(ncc2)cc(OC)c(OC)c3)c1	5.87	-4.47	1.39	literature	Clc1c(NC(=O)Nc2noc(C)c2)ccc(Oc2c3c(ncc2)cc(OC)c(OC)c3)c1	3.61574	107.74	454.87	107.74	3
FAK	FAK_30362749	Fluorescent ligand-binding assay	J Am Chem Soc.	Binding Kinetics Survey of the Drugged Kinome	30362749	Kinase	NA	Torin 2	FC(F)(F)c1cc(N2C(=O)C=Cc3c2c2c(nc3)ccc(-c3cnc(N)cc3)c2)ccc1	5.31	-3.61	1.71	literature	FC(F)(F)c1cc(N2C(=O)C=Cc3c2c2c(nc3)ccc(-c3cnc(N)cc3)c2)ccc1	5.05176	72.11	432.405	73.8	0
FAK	FAK_30362749	Fluorescent ligand-binding assay	J Am Chem Soc.	Binding Kinetics Survey of the Drugged Kinome	30362749	Kinase	NA	VX-680 (MK-0457 - Tozasertib)	S(c1nc(Nc2n[nH]c(C)c2)cc(N2CCN(C)CC2)n1)c1ccc(NC(=O)C2CC2)cc1	5.53	-4.49	1.03	literature	S(c1nc(Nc2n[nH]c(C)c2)cc(N2CCN(C)CC2)n1)c1ccc(NC(=O)C2CC2)cc1	2.586	102.07	464.598	102.07	2
FAK	FAK_30362749	Fluorescent ligand-binding assay	J Am Chem Soc.	Binding Kinetics Survey of the Drugged Kinome	30362749	Kinase	NA	Vandetanib (Zactima)	Brc1cc(F)c(Nc2ncnc3c2cc(OC)c(OCC2CCN(C)CC2)c3)cc1	5.11	-2.74	2.37	literature	Brc1cc(F)c(Nc2ncnc3c2cc(OC)c(OCC2CCN(C)CC2)c3)cc1	4.16674	59.51	475.362	59.51	4
FAK	FAK_30362749	Fluorescent ligand-binding assay	J Am Chem Soc.	Binding Kinetics Survey of the Drugged Kinome	30362749	Kinase	NA	WZ3146	Clc1c(Oc2cc(NC(=O)C=C)ccc2)nc(Nc2ccc(N3CCN(C)CC3)cc2)nc1	7.58	-6.37	1.21	literature	Clc1c(Oc2cc(NC(=O)C=C)ccc2)nc(Nc2ccc(N3CCN(C)CC3)cc2)nc1	3.187	82.62	464.957	82.62	0
FAK	FAK_30362749	Fluorescent ligand-binding assay	J Am Chem Soc.	Binding Kinetics Survey of the Drugged Kinome	30362749	Kinase	NA	WZ4002	Clc1c(Oc2cc(NC(=O)C=C)ccc2)nc(Nc2c(OC)cc(N3CCN(C)CC3)cc2)nc1	8.13	-6.67	1.51	literature	Clc1c(Oc2cc(NC(=O)C=C)ccc2)nc(Nc2c(OC)cc(N3CCN(C)CC3)cc2)nc1	3.178	91.85	494.983	91.85	0
FAK	FAK_30362749	Fluorescent ligand-binding assay	J Am Chem Soc.	Binding Kinetics Survey of the Drugged Kinome	30362749	Kinase	NA	WZ8040	Clc1c(Sc2cc(NC(=O)C=C)ccc2)nc(Nc2ccc(N3CCN(C)CC3)cc2)nc1	7.63	-6.15	1.47	literature	Clc1c(Sc2cc(NC(=O)C=C)ccc2)nc(Nc2ccc(N3CCN(C)CC3)cc2)nc1	3.823	73.39	481.024	73.39	0
FAK	FAK_30362749	Fluorescent ligand-binding assay	J Am Chem Soc.	Binding Kinetics Survey of the Drugged Kinome	30362749	Kinase	NA	XL-184 (Cabozantinib)	Fc1ccc(NC(=O)C2(C(=O)Nc3ccc(Oc4c5c(ncc4)cc(OC)c(OC)c5)cc3)CC2)cc1	6.2	-4.9	1.3	literature	Fc1ccc(NC(=O)C2(C(=O)Nc3ccc(Oc4c5c(ncc4)cc(OC)c(OC)c5)cc3)CC2)cc1	4.52074	98.78	501.514	98.78	4
FAK	FAK_30362749	Fluorescent ligand-binding assay	J Am Chem Soc.	Binding Kinetics Survey of the Drugged Kinome	30362749	Kinase	NA	ZM-447439	O=C(Nc1ccc(Nc2ncnc3c2cc(OC)c(OCCCN2CCOCC2)c3)cc1)c1ccccc1	5.5	-4.37	1.13	literature	O=C(Nc1ccc(Nc2ncnc3c2cc(OC)c(OCCCN2CCOCC2)c3)cc1)c1ccccc1	3.32274	97.84	513.598	97.84	0
FGFR1	FGFR1_30362749	Fluorescent ligand-binding assay	J Am Chem Soc.	Binding Kinetics Survey of the Drugged Kinome	30362749	Kinase	NA	AT9283	O=C(Nc1c(-c2[nH]c3c(n2)cc(CN2CCOCC2)cc3)n[nH]c1)NC1CC1	7.95	-6.73	1.21	literature	O=C(Nc1c(-c2[nH]c3c(n2)cc(CN2CCOCC2)cc3)n[nH]c1)NC1CC1	1.13706	110.96	381.44	110.96
FGFR1	FGFR1_30362749	Fluorescent ligand-binding assay	J Am Chem Soc.	Binding Kinetics Survey of the Drugged Kinome	30362749	Kinase	NA	AZ628	O=C(Nc1cc(Nc2cc3C(=O)N(C)C=Nc3cc2)c(C)cc1)c1cc(C(C#N)(C)C)ccc1	5.45	-3.42	2.01	literature	O=C(Nc1cc(Nc2cc3C(=O)N(C)C=Nc3cc2)c(C)cc1)c1cc(C(C#N)(C)C)ccc1	4.957	97.59	451.53	99.81	0
FGFR1	FGFR1_30362749	Fluorescent ligand-binding assay	J Am Chem Soc.	Binding Kinetics Survey of the Drugged Kinome	30362749	Kinase	NA	AZD4547	O=C(Nc1n[nH]c(CCc2cc(OC)cc(OC)c2)c1)c1ccc(N2C[C@@H](C)N[C@@H](C)C2)cc1	9.22	-7	2.22	literature	O=C(Nc1n[nH]c(CCc2cc(OC)cc(OC)c2)c1)c1ccc(N2C[C@@H](C)N[C@@H](C)C2)cc1	3.948	91.51	463.582	91.51	2
FGFR1	FGFR1_30362749	Fluorescent ligand-binding assay	J Am Chem Soc.	Binding Kinetics Survey of the Drugged Kinome	30362749	Kinase	NA	BGJ398 (NVP-BGJ398)	Clc1c(NC(=O)N(C)c2ncnc(Nc3ccc(N4CCN(CC)CC4)cc3)c2)c(Cl)c(OC)cc1OC	9.83	-6.53	3.32	literature	Clc1c(NC(=O)N(C)c2ncnc(Nc3ccc(N4CCN(CC)CC4)cc3)c2)c(Cl)c(OC)cc1OC	3.451	95.09	560.486	95.09	3
FGFR1	FGFR1_30362749	Fluorescent ligand-binding assay	J Am Chem Soc.	Binding Kinetics Survey of the Drugged Kinome	30362749	Kinase	NA	BIRB 796 (Doramapimod)	O=C(Nc1n(-c2ccc(C)cc2)nc(C(C)(C)C)c1)Nc1c2c(c(OCCN3CCOCC3)cc1)cccc2	5.38	-3.61	1.77	literature	O=C(Nc1n(-c2ccc(C)cc2)nc(C(C)(C)C)c1)Nc1c2c(c(OCCN3CCOCC3)cc1)cccc2	4.943	80.65	527.669	80.65	2
FGFR1	FGFR1_30362749	Fluorescent ligand-binding assay	J Am Chem Soc.	Binding Kinetics Survey of the Drugged Kinome	30362749	Kinase	NA	BX-912	Brc1c(NCCc2[nH]cnc2)nc(Nc2cc(NC(=O)N3CCCC3)ccc2)nc1	7.11	-6.7	0.35	literature	Brc1c(NCCc2[nH]cnc2)nc(Nc2cc(NC(=O)N3CCCC3)ccc2)nc1	1.234	110.86	471.363	110.86	0
FGFR1	FGFR1_30362749	Fluorescent ligand-binding assay	J Am Chem Soc.	Binding Kinetics Survey of the Drugged Kinome	30362749	Kinase	NA	Brivanib alaninate (BMS-582664) - prodrug	Fc1c(OC2=NC=Nn3c2c(C)c(OC[C@H](OC(=O)[C@@H](N)C)C)c3)ccc2[nH]c(C)cc12	7.12	-6.64	0.45	literature	Fc1c(OC2=NC=Nn3c2c(C)c(OC[C@H](OC(=O)[C@@H](N)C)C)c3)ccc2[nH]c(C)cc12	2.97074	116.22	441.463	116.76	0
FGFR1	FGFR1_30362749	Fluorescent ligand-binding assay	J Am Chem Soc.	Binding Kinetics Survey of the Drugged Kinome	30362749	Kinase	NA	CCT129202	Clc1c(N2CCN(CC(=O)Nc3sccn3)CC2)c2[nH]c(-c3ccc(N(C)C)cc3)nc2nc1	7.26	-6.5	0.79	literature	Clc1c(N2CCN(CC(=O)Nc3sccn3)CC2)c2[nH]c(-c3ccc(N(C)C)cc3)nc2nc1	1.99653	93.28	497.027	93.28
FGFR1	FGFR1_30362749	Fluorescent ligand-binding assay	J Am Chem Soc.	Binding Kinetics Survey of the Drugged Kinome	30362749	Kinase	NA	Crenolanib (CP-868596)	O(CC1(C)COC1)c1cc2ncn(-c3nc4c(N5CCC(N)CC5)cccc4cc3)c2cc1	5.55	-5.19	0.38	literature	O(CC1(C)COC1)c1cc2ncn(-c3nc4c(N5CCC(N)CC5)cccc4cc3)c2cc1	3.834	78.43	443.551	78.43	3
FGFR1	FGFR1_30362749	Fluorescent ligand-binding assay	J Am Chem Soc.	Binding Kinetics Survey of the Drugged Kinome	30362749	Kinase	NA	Danusertib (PHA-739358)	O=C([C@H](OC)c1ccccc1)N1Cc2c(NC(=O)c3ccc(N4CCN(C)CC4)cc3)n[nH]c2C1	6.86	-4.74	2.12	literature	O=C([C@H](OC)c1ccccc1)N1Cc2c(NC(=O)c3ccc(N4CCN(C)CC4)cc3)n[nH]c2C1	2.235	93.8	474.565	93.8	0
FGFR1	FGFR1_30362749	Fluorescent ligand-binding assay	J Am Chem Soc.	Binding Kinetics Survey of the Drugged Kinome	30362749	Kinase	NA	E7080 (Lenvatinib)	Clc1c(NC(=O)NC2CC2)ccc(Oc2c3c(ncc2)cc(OC)c(C(=O)N)c3)c1	7.4	-6.71	0.63	literature	Clc1c(NC(=O)NC2CC2)ccc(Oc2c3c(ncc2)cc(OC)c(C(=O)N)c3)c1	2.902	115.57	426.86	115.57	0
FGFR1	FGFR1_30362749	Fluorescent ligand-binding assay	J Am Chem Soc.	Binding Kinetics Survey of the Drugged Kinome	30362749	Kinase	NA	ENMD-2076	N(c1nc(/C=C/c2ccccc2)nc(N2CCN(C)CC2)c1)c1n[nH]c(C)c1	7.35	-7.16	0.18	literature	N(c1nc(/C=C/c2ccccc2)nc(N2CCN(C)CC2)c1)c1n[nH]c(C)c1	2.969	72.97	375.48	72.97	0
FGFR1	FGFR1_30362749	Fluorescent ligand-binding assay	J Am Chem Soc.	Binding Kinetics Survey of the Drugged Kinome	30362749	Kinase	NA	GSK1070916	O=C(N(C)C)Nc1ccc(-c2c(-c3c4c([nH]c(-c5cc(CN(C)C)ccc5)c4)ncc3)cn(CC)n2)cc1	6.84	-5.69	1.14	literature	O=C(N(C)C)Nc1ccc(-c2c(-c3c4c([nH]c(-c5cc(CN(C)C)ccc5)c4)ncc3)cn(CC)n2)cc1	4.46	82.08	507.642	82.08	1
FGFR1	FGFR1_30362749	Fluorescent ligand-binding assay	J Am Chem Soc.	Binding Kinetics Survey of the Drugged Kinome	30362749	Kinase	NA	Hesperadin	S(=O)(=O)(Nc1cc2/C(=C(/Nc3ccc(CN4CCCCC4)cc3)\c3ccccc3)/C(=O)Nc2cc1)CC	8.11	-7.91	0.18	literature	S(=O)(=O)(Nc1cc2/C(=C(/Nc3ccc(CN4CCCCC4)cc3)\c3ccccc3)/C(=O)Nc2cc1)CC	5.433	90.54	516.666	90.54	0
FGFR1	FGFR1_30362749	Fluorescent ligand-binding assay	J Am Chem Soc.	Binding Kinetics Survey of the Drugged Kinome	30362749	Kinase	NA	Ki8751	Fc1c(NC(=O)Nc2c(F)cc(Oc3c4c(ncc3)cc(OC)c(OC)c4)cc2)ccc(F)c1	5.33	-3.43	1.97	literature	Fc1c(NC(=O)Nc2c(F)cc(Oc3c4c(ncc3)cc(OC)c(OC)c4)cc2)ccc(F)c1	4.56974	81.71	469.419	81.71	0
FGFR1	FGFR1_30362749	Fluorescent ligand-binding assay	J Am Chem Soc.	Binding Kinetics Survey of the Drugged Kinome	30362749	Kinase	NA	PD173074	O=C(NC(C)(C)C)Nc1c(-c2cc(OC)cc(OC)c2)cc2c(n1)nc(NCCCCN(CC)CC)nc2	8.82	-6.37	2.45	literature	O=C(NC(C)(C)C)Nc1c(-c2cc(OC)cc(OC)c2)cc2c(n1)nc(NCCCCN(CC)CC)nc2	3.968	113.53	523.682	113.53	0
FGFR1	FGFR1_30362749	Fluorescent ligand-binding assay	J Am Chem Soc.	Binding Kinetics Survey of the Drugged Kinome	30362749	Kinase	NA	PF-03814735	FC(F)(F)c1c(NC2CCC2)nc(Nc2cc3[C@@H]4N(C(=O)CNC(=O)C)[C@H](c3cc2)CC4)nc1	7.94	-7.04	0.94	literature	FC(F)(F)c1c(NC2CCC2)nc(Nc2cc3[C@@H]4N(C(=O)CNC(=O)C)[C@H](c3cc2)CC4)nc1	2.73576	99.25	474.487	99.25	0
FGFR1	FGFR1_30362749	Fluorescent ligand-binding assay	J Am Chem Soc.	Binding Kinetics Survey of the Drugged Kinome	30362749	Kinase	NA	PHA-680632	O=C(Nc1c(CC)cccc1CC)N1Cc2c(NC(=O)c3ccc(N4CCN(C)CC4)cc3)n[nH]c2C1	7.63	-5.59	2.05	literature	O=C(Nc1c(CC)cccc1CC)N1Cc2c(NC(=O)c3ccc(N4CCN(C)CC4)cc3)n[nH]c2C1	3.374	96.6	501.635	96.6	0
FGFR1	FGFR1_30362749	Fluorescent ligand-binding assay	J Am Chem Soc.	Binding Kinetics Survey of the Drugged Kinome	30362749	Kinase	NA	R406	Fc1c(Nc2nc3NC(=O)C(C)(C)Oc3cc2)nc(Nc2cc(OC)c(OC)c(OC)c2)nc1	7.51	-7.13	0.42	literature	Fc1c(Nc2nc3NC(=O)C(C)(C)Oc3cc2)nc(Nc2cc(OC)c(OC)c(OC)c2)nc1	1.87148	128.75	470.461	128.75	2
FGFR1	FGFR1_30362749	Fluorescent ligand-binding assay	J Am Chem Soc.	Binding Kinetics Survey of the Drugged Kinome	30362749	Kinase	NA	Staurosporine	O(C)[C@@H]1[C@H](NC)C[C@H]2O[C@]1(C)n1c3c4n2c2c(c4c4C(=O)NCc4c3c3c1cccc3)cccc2	8.37	-7.74	0.66	literature	O(C)[C@@H]1[C@H](NC)C[C@H]2O[C@]1(C)n1c3c4n2c2c(c4c4C(=O)NCc4c3c3c1cccc3)cccc2	6.35953	69.45	466.541	69.45	0
FGFR1	FGFR1_30362749	Fluorescent ligand-binding assay	J Am Chem Soc.	Binding Kinetics Survey of the Drugged Kinome	30362749	Kinase	NA	TAE684 (NVP-TAE684)	Clc1c(Nc2c(S(=O)(=O)C(C)C)cccc2)nc(Nc2c(OC)cc(N3CCC(N4CCN(C)CC4)CC3)cc2)nc1	7.98	-7.03	0.95	literature	Clc1c(Nc2c(S(=O)(=O)C(C)C)cccc2)nc(Nc2c(OC)cc(N3CCC(N4CCN(C)CC4)CC3)cc2)nc1	3.959	102.93	614.215	102.93	0
FGFR1	FGFR1_30362749	Fluorescent ligand-binding assay	J Am Chem Soc.	Binding Kinetics Survey of the Drugged Kinome	30362749	Kinase	NA	TAK-901	S(=O)(=O)(CC)c1cc(-c2c3c(c(C)c(C(=O)NC4CCN(C)CC4)c2)[nH]c2ncc(C)cc32)ccc1	7.73	-6.97	0.79	literature	S(=O)(=O)(CC)c1cc(-c2c3c(c(C)c(C(=O)NC4CCN(C)CC4)c2)[nH]c2ncc(C)cc32)ccc1	4.722	95.16	504.655	95.16	1
FGFR1	FGFR1_30362749	Fluorescent ligand-binding assay	J Am Chem Soc.	Binding Kinetics Survey of the Drugged Kinome	30362749	Kinase	NA	TWS119	O(c1ncnc2[nH]c(-c3cc(N)ccc3)cc12)c1cc(O)ccc1	6.48	-6.03	0.42	literature	O(c1ncnc2[nH]c(-c3cc(N)ccc3)cc12)c1cc(O)ccc1	3.011	97.05	318.336	97.05	0
FGFR1	FGFR1_30362749	Fluorescent ligand-binding assay	J Am Chem Soc.	Binding Kinetics Survey of the Drugged Kinome	30362749	Kinase	NA	WHI-P154	Brc1c(O)ccc(Nc2ncnc3c2cc(OC)c(OC)c3)c1	5.49	-3.46	2.04	literature	Brc1c(O)ccc(Nc2ncnc3c2cc(OC)c(OC)c3)c1	3.00974	76.5	376.21	76.5	0
FGFR3	FGFR3_30362749	Fluorescent ligand-binding assay	J Am Chem Soc.	Binding Kinetics Survey of the Drugged Kinome	30362749	Kinase	NA	AEE788 (NVP-AEE788)	N([C@H](C)c1ccccc1)c1ncnc2[nH]c(-c3ccc(CN4CCN(CC)CC4)cc3)cc12	6.23	-5.37	0.85	literature	N([C@H](C)c1ccccc1)c1ncnc2[nH]c(-c3ccc(CN4CCN(CC)CC4)cc3)cc12	4.119	60.08	440.595	60.08	0
FGFR3	FGFR3_30362749	Fluorescent ligand-binding assay	J Am Chem Soc.	Binding Kinetics Survey of the Drugged Kinome	30362749	Kinase	NA	AT9283	O=C(Nc1c(-c2[nH]c3c(n2)cc(CN2CCOCC2)cc3)n[nH]c1)NC1CC1	8.39	-6.69	1.71	literature	O=C(Nc1c(-c2[nH]c3c(n2)cc(CN2CCOCC2)cc3)n[nH]c1)NC1CC1	1.13706	110.96	381.44	110.96
FGFR3	FGFR3_30362749	Fluorescent ligand-binding assay	J Am Chem Soc.	Binding Kinetics Survey of the Drugged Kinome	30362749	Kinase	NA	AZD4547	O=C(Nc1n[nH]c(CCc2cc(OC)cc(OC)c2)c1)c1ccc(N2C[C@@H](C)N[C@@H](C)C2)cc1	8.93	-7.13	1.81	literature	O=C(Nc1n[nH]c(CCc2cc(OC)cc(OC)c2)c1)c1ccc(N2C[C@@H](C)N[C@@H](C)C2)cc1	3.948	91.51	463.582	91.51	2
FGFR3	FGFR3_30362749	Fluorescent ligand-binding assay	J Am Chem Soc.	Binding Kinetics Survey of the Drugged Kinome	30362749	Kinase	NA	Axitinib	S(c1c(C(=O)NC)cccc1)c1cc2[nH]nc(/C=C/c3ncccc3)c2cc1	7.89	-7.16	0.77	literature	S(c1c(C(=O)NC)cccc1)c1cc2[nH]nc(/C=C/c3ncccc3)c2cc1	4.643	70.67	386.479	70.67	0
FGFR3	FGFR3_30362749	Fluorescent ligand-binding assay	J Am Chem Soc.	Binding Kinetics Survey of the Drugged Kinome	30362749	Kinase	NA	BGJ398 (NVP-BGJ398)	Clc1c(NC(=O)N(C)c2ncnc(Nc3ccc(N4CCN(CC)CC4)cc3)c2)c(Cl)c(OC)cc1OC	9.89	-6.67	3.25	literature	Clc1c(NC(=O)N(C)c2ncnc(Nc3ccc(N4CCN(CC)CC4)cc3)c2)c(Cl)c(OC)cc1OC	3.451	95.09	560.486	95.09	3
FGFR3	FGFR3_30362749	Fluorescent ligand-binding assay	J Am Chem Soc.	Binding Kinetics Survey of the Drugged Kinome	30362749	Kinase	NA	BIBF1120 (Vargatef)	O=C(N(C)c1ccc(N/C(/c2ccccc2)=C/2\C(=O)Nc3c\2ccc(C(=O)OC)c3)cc1)CN1CCN(C)CC1	7.34	-6.59	1.37	literature	O=C(N(C)c1ccc(N/C(/c2ccccc2)=C/2\C(=O)Nc3c\2ccc(C(=O)OC)c3)cc1)CN1CCN(C)CC1	3.507	94.22	539.636	94.22	0
FGFR3	FGFR3_30362749	Fluorescent ligand-binding assay	J Am Chem Soc.	Binding Kinetics Survey of the Drugged Kinome	30362749	Kinase	NA	BIRB 796 (Doramapimod)	O=C(Nc1n(-c2ccc(C)cc2)nc(C(C)(C)C)c1)Nc1c2c(c(OCCN3CCOCC3)cc1)cccc2	5.13	-3.52	1.66	literature	O=C(Nc1n(-c2ccc(C)cc2)nc(C(C)(C)C)c1)Nc1c2c(c(OCCN3CCOCC3)cc1)cccc2	4.943	80.65	527.669	80.65	2
FGFR3	FGFR3_30362749	Fluorescent ligand-binding assay	J Am Chem Soc.	Binding Kinetics Survey of the Drugged Kinome	30362749	Kinase	NA	BIX 02189	O=C(N(C)C)c1cc2NC(=O)/C(=C(\Nc3cc(CN(C)C)ccc3)/c3ccccc3)/c2cc1	6.22	-5.38	0.83	literature	O=C(N(C)C)c1cc2NC(=O)/C(=C(\Nc3cc(CN(C)C)ccc3)/c3ccccc3)/c2cc1	4.384	64.68	440.547	64.68	0
FGFR3	FGFR3_30362749	Fluorescent ligand-binding assay	J Am Chem Soc.	Binding Kinetics Survey of the Drugged Kinome	30362749	Kinase	NA	BMS 794833	Clc1c(N)nccc1Oc1c(F)cc(NC(=O)C=2C(=O)C(c3ccc(F)cc3)=CNC=2)cc1	5.49	-4.6	0.93	literature	Clc1c(N)nccc1Oc1c(F)cc(NC(=O)C=2C(=O)C(c3ccc(F)cc3)=CNC=2)cc1	3.076	106.34	468.847	110.1	0
FGFR3	FGFR3_30362749	Fluorescent ligand-binding assay	J Am Chem Soc.	Binding Kinetics Survey of the Drugged Kinome	30362749	Kinase	NA	BX-912	Brc1c(NCCc2[nH]cnc2)nc(Nc2cc(NC(=O)N3CCCC3)ccc2)nc1	7.37	-6.53	0.8	literature	Brc1c(NCCc2[nH]cnc2)nc(Nc2cc(NC(=O)N3CCCC3)ccc2)nc1	1.234	110.86	471.363	110.86	0
FGFR3	FGFR3_30362749	Fluorescent ligand-binding assay	J Am Chem Soc.	Binding Kinetics Survey of the Drugged Kinome	30362749	Kinase	NA	Baricitinib (LY3009104 - incb28050)	S(=O)(=O)(CC)N1CC(CC#N)(n2ncc(-c3ncnc4[nH]ccc34)c2)C1	5.71	-4.94	0.74	literature	S(=O)(=O)(CC)N1CC(CC#N)(n2ncc(-c3ncnc4[nH]ccc34)c2)C1	-1.528	120.56	371.425	120.56	4
FGFR3	FGFR3_30362749	Fluorescent ligand-binding assay	J Am Chem Soc.	Binding Kinetics Survey of the Drugged Kinome	30362749	Kinase	NA	Bosutinib (SKI-606)	Clc1c(OC)cc(Nc2c(C#N)cnc3c2cc(OC)c(OCCCN2CCN(C)CC2)c3)c(Cl)c1	6.55	-4.96	1.6	literature	Clc1c(OC)cc(Nc2c(C#N)cnc3c2cc(OC)c(OCCCN2CCN(C)CC2)c3)c(Cl)c1	3.93474	82.88	530.456	82.88	4
FGFR3	FGFR3_30362749	Fluorescent ligand-binding assay	J Am Chem Soc.	Binding Kinetics Survey of the Drugged Kinome	30362749	Kinase	NA	CCT129202	Clc1c(N2CCN(CC(=O)Nc3sccn3)CC2)c2[nH]c(-c3ccc(N(C)C)cc3)nc2nc1	7.48	-6.49	1.03	literature	Clc1c(N2CCN(CC(=O)Nc3sccn3)CC2)c2[nH]c(-c3ccc(N(C)C)cc3)nc2nc1	1.99653	93.28	497.027	93.28
FGFR3	FGFR3_30362749	Fluorescent ligand-binding assay	J Am Chem Soc.	Binding Kinetics Survey of the Drugged Kinome	30362749	Kinase	NA	CI-1033 (Canertinib)	Clc1c(F)ccc(Nc2ncnc3c2cc(NC(=O)C=C)c(OCCCN2CCOCC2)c3)c1	5.86	-5.29	0.59	literature	Clc1c(F)ccc(Nc2ncnc3c2cc(NC(=O)C=C)c(OCCCN2CCOCC2)c3)c1	3.269	88.61	485.947	88.61	3
FGFR3	FGFR3_30362749	Fluorescent ligand-binding assay	J Am Chem Soc.	Binding Kinetics Survey of the Drugged Kinome	30362749	Kinase	NA	CP 673451	O(CCOc1cc2ncn(-c3nc4c(N5CCC(N)CC5)cccc4cc3)c2cc1)C	6	-5.61	0.37	literature	O(CCOc1cc2ncn(-c3nc4c(N5CCC(N)CC5)cccc4cc3)c2cc1)C	3.25174	78.43	417.513	78.43	0
FGFR3	FGFR3_30362749	Fluorescent ligand-binding assay	J Am Chem Soc.	Binding Kinetics Survey of the Drugged Kinome	30362749	Kinase	NA	CYC116	N(c1nc(-c2c(C)nc(N)s2)ccn1)c1ccc(N2CCOCC2)cc1	7.11	-6.32	0.76	literature	N(c1nc(-c2c(C)nc(N)s2)ccn1)c1ccc(N2CCOCC2)cc1	1.126	89.19	368.465	89.19	1
FGFR3	FGFR3_30362749	Fluorescent ligand-binding assay	J Am Chem Soc.	Binding Kinetics Survey of the Drugged Kinome	30362749	Kinase	NA	Cediranib (AZD2171)	Fc1c(Oc2ncnc3c2cc(OC)c(OCCCN2CCCC2)c3)ccc2[nH]c(C)cc12	7.05	-7.06	1.18	literature	Fc1c(Oc2ncnc3c2cc(OC)c(OCCCN2CCCC2)c3)ccc2[nH]c(C)cc12	4.21274	72.5	450.514	72.5	3
FGFR3	FGFR3_30362749	Fluorescent ligand-binding assay	J Am Chem Soc.	Binding Kinetics Survey of the Drugged Kinome	30362749	Kinase	NA	Crenolanib (CP-868596)	O(CC1(C)COC1)c1cc2ncn(-c3nc4c(N5CCC(N)CC5)cccc4cc3)c2cc1	6.09	-5.05	1.1	literature	O(CC1(C)COC1)c1cc2ncn(-c3nc4c(N5CCC(N)CC5)cccc4cc3)c2cc1	3.834	78.43	443.551	78.43	3
FGFR3	FGFR3_30362749	Fluorescent ligand-binding assay	J Am Chem Soc.	Binding Kinetics Survey of the Drugged Kinome	30362749	Kinase	NA	Cyt387	O=C(NCC#N)c1ccc(-c2nc(Nc3ccc(N4CCOCC4)cc3)ncc2)cc1	6.49	-5.88	0.55	literature	O=C(NCC#N)c1ccc(-c2nc(Nc3ccc(N4CCOCC4)cc3)ncc2)cc1	1.468	103.17	414.469	103.17	3
FGFR3	FGFR3_30362749	Fluorescent ligand-binding assay	J Am Chem Soc.	Binding Kinetics Survey of the Drugged Kinome	30362749	Kinase	NA	Danusertib (PHA-739358)	O=C([C@H](OC)c1ccccc1)N1Cc2c(NC(=O)c3ccc(N4CCN(C)CC4)cc3)n[nH]c2C1	7.09	-4.84	2.26	literature	O=C([C@H](OC)c1ccccc1)N1Cc2c(NC(=O)c3ccc(N4CCN(C)CC4)cc3)n[nH]c2C1	2.235	93.8	474.565	93.8	0
FGFR3	FGFR3_30362749	Fluorescent ligand-binding assay	J Am Chem Soc.	Binding Kinetics Survey of the Drugged Kinome	30362749	Kinase	NA	Desmethyl Erlotinib (CP-473420)	O(CCOc1c(OCCO)cc2c(Nc3cc(C#C)ccc3)ncnc2c1)C	5.95	-5.62	0.38	literature	O(CCOc1c(OCCO)cc2c(Nc3cc(C#C)ccc3)ncnc2c1)C	1.97548	85.73	379.416	85.73	0
FGFR3	FGFR3_30362749	Fluorescent ligand-binding assay	J Am Chem Soc.	Binding Kinetics Survey of the Drugged Kinome	30362749	Kinase	NA	Dovitinib (TKI-258)	Fc1c2C(N)=C(c3[nH]c4c(n3)ccc(N3CCN(C)CC3)c4)C(=O)Nc2ccc1	8.12	-7.55	0.51	literature	Fc1c2C(N)=C(c3[nH]c4c(n3)ccc(N3CCN(C)CC3)c4)C(=O)Nc2ccc1	1.59	90.28	392.438	94.04	3
FGFR3	FGFR3_30362749	Fluorescent ligand-binding assay	J Am Chem Soc.	Binding Kinetics Survey of the Drugged Kinome	30362749	Kinase	NA	E7080 (Lenvatinib)	Clc1c(NC(=O)NC2CC2)ccc(Oc2c3c(ncc2)cc(OC)c(C(=O)N)c3)c1	7.58	-6.84	0.75	literature	Clc1c(NC(=O)NC2CC2)ccc(Oc2c3c(ncc2)cc(OC)c(C(=O)N)c3)c1	2.902	115.57	426.86	115.57	0
FGFR3	FGFR3_30362749	Fluorescent ligand-binding assay	J Am Chem Soc.	Binding Kinetics Survey of the Drugged Kinome	30362749	Kinase	NA	ENMD-2076	N(c1nc(/C=C/c2ccccc2)nc(N2CCN(C)CC2)c1)c1n[nH]c(C)c1	7.36	-6.35	1.02	literature	N(c1nc(/C=C/c2ccccc2)nc(N2CCN(C)CC2)c1)c1n[nH]c(C)c1	2.969	72.97	375.48	72.97	0
FGFR3	FGFR3_30362749	Fluorescent ligand-binding assay	J Am Chem Soc.	Binding Kinetics Survey of the Drugged Kinome	30362749	Kinase	NA	Enzastaurin (LY317615)	O=C1C(c2c3c(n(C)c2)cccc3)=C(c2c3c(n(C4CCN(Cc5ncccc5)CC4)c2)cccc3)C(=O)N1	5.21	-4.37	0.83	literature	O=C1C(c2c3c(n(C)c2)cccc3)=C(c2c3c(n(C4CCN(Cc5ncccc5)CC4)c2)cccc3)C(=O)N1	5.661	72.16	515.617	72.16	3
FGFR3	FGFR3_30362749	Fluorescent ligand-binding assay	J Am Chem Soc.	Binding Kinetics Survey of the Drugged Kinome	30362749	Kinase	NA	Foretinib (GSK1363089 - XL880)	Fc1c(Oc2c3c(ncc2)cc(OCCCN2CCOCC2)c(OC)c3)ccc(NC(=O)C2(C(=O)Nc3ccc(F)cc3)CC2)c1	6.72	-5.5	1.23	literature	Fc1c(Oc2c3c(ncc2)cc(OCCCN2CCOCC2)c(OC)c3)ccc(NC(=O)C2(C(=O)Nc3ccc(F)cc3)CC2)c1	4.59374	111.25	632.664	111.25	2
FGFR3	FGFR3_30362749	Fluorescent ligand-binding assay	J Am Chem Soc.	Binding Kinetics Survey of the Drugged Kinome	30362749	Kinase	NA	Golvatinib (E7050)	Fc1c(NC(=O)C2(C(=O)Nc3ccc(F)cc3)CC2)ccc(Oc2cc(NC(=O)N3CCC(N4CCN(C)CC4)CC3)ncc2)c1	5.75	-5.38	0.39	literature	Fc1c(NC(=O)C2(C(=O)Nc3ccc(F)cc3)CC2)ccc(Oc2cc(NC(=O)N3CCC(N4CCN(C)CC4)CC3)ncc2)c1	3.17	119.14	633.7	119.14	0
FGFR3	FGFR3_30362749	Fluorescent ligand-binding assay	J Am Chem Soc.	Binding Kinetics Survey of the Drugged Kinome	30362749	Kinase	NA	Hesperadin	S(=O)(=O)(Nc1cc2/C(=C(/Nc3ccc(CN4CCCCC4)cc3)\c3ccccc3)/C(=O)Nc2cc1)CC	8.35	-7.33	1.07	literature	S(=O)(=O)(Nc1cc2/C(=C(/Nc3ccc(CN4CCCCC4)cc3)\c3ccccc3)/C(=O)Nc2cc1)CC	5.433	90.54	516.666	90.54	0
FGFR3	FGFR3_30362749	Fluorescent ligand-binding assay	J Am Chem Soc.	Binding Kinetics Survey of the Drugged Kinome	30362749	Kinase	NA	KRN 633	Clc1c(NC(=O)NCCC)ccc(Oc2ncnc3c2cc(OC)c(OC)c3)c1	5.6	-3.79	1.83	literature	Clc1c(NC(=O)NCCC)ccc(Oc2ncnc3c2cc(OC)c(OC)c3)c1	3.22974	94.6	416.865	94.6	1
FGFR3	FGFR3_30362749	Fluorescent ligand-binding assay	J Am Chem Soc.	Binding Kinetics Survey of the Drugged Kinome	30362749	Kinase	NA	KW 2449	O=C(N1CCNCC1)c1ccc(/C=C/c2n[nH]c3c2cccc3)cc1	6.15	-5.8	0.27	literature	O=C(N1CCNCC1)c1ccc(/C=C/c2n[nH]c3c2cccc3)cc1	3.087	61.02	332.407	61.02	0
FGFR3	FGFR3_30362749	Fluorescent ligand-binding assay	J Am Chem Soc.	Binding Kinetics Survey of the Drugged Kinome	30362749	Kinase	NA	Ki8751	Fc1c(NC(=O)Nc2c(F)cc(Oc3c4c(ncc3)cc(OC)c(OC)c4)cc2)ccc(F)c1	5.38	-4.45	0.83	literature	Fc1c(NC(=O)Nc2c(F)cc(Oc3c4c(ncc3)cc(OC)c(OC)c4)cc2)ccc(F)c1	4.56974	81.71	469.419	81.71	0
FGFR3	FGFR3_30362749	Fluorescent ligand-binding assay	J Am Chem Soc.	Binding Kinetics Survey of the Drugged Kinome	30362749	Kinase	NA	LDN193189	N1(c2ccc(C3=Cn4ncc(-c5c6c(ncc5)cccc6)c4N=C3)cc2)CCNCC1	6	-4.57	1.43	literature	N1(c2ccc(C3=Cn4ncc(-c5c6c(ncc5)cccc6)c4N=C3)cc2)CCNCC1	3.039	58.34	406.493	58.35	0
FGFR3	FGFR3_30362749	Fluorescent ligand-binding assay	J Am Chem Soc.	Binding Kinetics Survey of the Drugged Kinome	30362749	Kinase	NA	LY2784544	Clc1cc(F)c(Cc2c(C)nc3C(CN4CCOCC4)=CC(Nc4n[nH]c(C)c4)=Nn23)cc1	7.18	-6.31	0.85	literature	Clc1cc(F)c(Cc2c(C)nc3C(CN4CCOCC4)=CC(Nc4n[nH]c(C)c4)=Nn23)cc1	3.368	83.36	469.952	83.37	2
FGFR3	FGFR3_30362749	Fluorescent ligand-binding assay	J Am Chem Soc.	Binding Kinetics Survey of the Drugged Kinome	30362749	Kinase	NA	Linifanib (ABT-869)	Fc1c(NC(=O)Nc2ccc(-c3c4c(N)n[nH]c4ccc3)cc2)cc(C)cc1	5.86	-5.18	0.93	literature	Fc1c(NC(=O)Nc2ccc(-c3c4c(N)n[nH]c4ccc3)cc2)cc(C)cc1	4.535	95.83	375.407	95.83	3
FGFR3	FGFR3_30362749	Fluorescent ligand-binding assay	J Am Chem Soc.	Binding Kinetics Survey of the Drugged Kinome	30362749	Kinase	NA	Linsitinib (OSI-906)	OC1(C)CC(c2n3c(c(-c4cc5nc(-c6ccccc6)ccc5cc4)n2)C(N)=NC=C3)C1	5.22	-2.83	2.34	literature	OC1(C)CC(c2n3c(c(-c4cc5nc(-c6ccccc6)ccc5cc4)n2)C(N)=NC=C3)C1	3.405	89.32	421.504	89.33	0
FGFR3	FGFR3_30362749	Fluorescent ligand-binding assay	J Am Chem Soc.	Binding Kinetics Survey of the Drugged Kinome	30362749	Kinase	NA	MGCD-265	S=C(NC(=O)Cc1ccc(F)cc1)Nc1cc(F)c(Oc2c3sc(-c4ncc(CNCCOC)cc4)cc3ncc2)cc1	5.96	-5.11	0.82	literature	S=C(NC(=O)Cc1ccc(F)cc1)Nc1cc(F)c(Oc2c3sc(-c4ncc(CNCCOC)cc4)cc3ncc2)cc1	5.155	129.49	619.717	97.4	2
FGFR3	FGFR3_30362749	Fluorescent ligand-binding assay	J Am Chem Soc.	Binding Kinetics Survey of the Drugged Kinome	30362749	Kinase	NA	MLN8054	Clc1cc2C(c3c(F)cccc3F)=NCc3c(nc(Nc4ccc(C(=O)O)cc4)nc3)-c2cc1	6.41	-6.05	0.32	literature	Clc1cc2C(c3c(F)cccc3F)=NCc3c(nc(Nc4ccc(C(=O)O)cc4)nc3)-c2cc1	5.189	87.47	476.87	87.47	0
FGFR3	FGFR3_30362749	Fluorescent ligand-binding assay	J Am Chem Soc.	Binding Kinetics Survey of the Drugged Kinome	30362749	Kinase	NA	MLN8237 (Alisertib)	Clc1cc2C(c3c(F)cccc3OC)=NCc3c(nc(Nc4cc(OC)c(C(=O)O)cc4)nc3)-c2cc1	6.75	-5.97	0.79	literature	Clc1cc2C(c3c(F)cccc3OC)=NCc3c(nc(Nc4cc(OC)c(C(=O)O)cc4)nc3)-c2cc1	4.983	105.93	518.932	105.93	3
FGFR3	FGFR3_30362749	Fluorescent ligand-binding assay	J Am Chem Soc.	Binding Kinetics Survey of the Drugged Kinome	30362749	Kinase	NA	Milciclib (PHA-848125)	O=C(NC)c1nn(C)c-2c1C(C)(C)Cc1c-2nc(Nc2ccc(N3CCN(C)CC3)cc2)nc1	6.55	-4.91	1.64	literature	O=C(NC)c1nn(C)c-2c1C(C)(C)Cc1c-2nc(Nc2ccc(N3CCN(C)CC3)cc2)nc1	0.92053	91.21	460.586	91.21	1
FGFR3	FGFR3_30362749	Fluorescent ligand-binding assay	J Am Chem Soc.	Binding Kinetics Survey of the Drugged Kinome	30362749	Kinase	NA	NVP-BSK805	Fc1c(CN2CCOCC2)c(F)cc(-c2c3nc(-c4cn(C5CCNCC5)nc4)cnc3ccc2)c1	6.76	-6.19	0.59	literature	Fc1c(CN2CCOCC2)c(F)cc(-c2c3nc(-c4cn(C5CCNCC5)nc4)cnc3ccc2)c1	3.38953	68.1	490.558	68.1	0
FGFR3	FGFR3_30362749	Fluorescent ligand-binding assay	J Am Chem Soc.	Binding Kinetics Survey of the Drugged Kinome	30362749	Kinase	NA	NVP-TAE226	Clc1c(Nc2c(C(=O)NC)cccc2)nc(Nc2c(OC)cc(N3CCOCC3)cc2)nc1	6.83	-5.96	0.8	literature	Clc1c(Nc2c(C(=O)NC)cccc2)nc(Nc2c(OC)cc(N3CCOCC3)cc2)nc1	2.424	100.64	468.945	100.64	0
FGFR3	FGFR3_30362749	Fluorescent ligand-binding assay	J Am Chem Soc.	Binding Kinetics Survey of the Drugged Kinome	30362749	Kinase	NA	Neratinib (HKI-272)	Clc1c(OCc2ncccc2)ccc(Nc2c(C#N)cnc3c2cc(NC(=O)/C=C/CN(C)C)c(OCC)c3)c1	5.44	-5.11	0.8	literature	Clc1c(OCc2ncccc2)ccc(Nc2c(C#N)cnc3c2cc(NC(=O)/C=C/CN(C)C)c(OCC)c3)c1	4.3	112.4	557.054	112.4	4
FGFR3	FGFR3_30362749	Fluorescent ligand-binding assay	J Am Chem Soc.	Binding Kinetics Survey of the Drugged Kinome	30362749	Kinase	NA	PCI-32765 (Ibrutinib)	O=C(C=C)N1C[C@H](n2nc(-c3ccc(Oc4ccccc4)cc3)c3c(N)ncnc23)CCC1	6.69	-6.02	0.74	literature	O=C(C=C)N1C[C@H](n2nc(-c3ccc(Oc4ccccc4)cc3)c3c(N)ncnc23)CCC1	3.24753	99.16	440.507	99.16	0
FGFR3	FGFR3_30362749	Fluorescent ligand-binding assay	J Am Chem Soc.	Binding Kinetics Survey of the Drugged Kinome	30362749	Kinase	NA	PD 0332991 (Palbociclib) HCl	O=C(C)C=1C(=O)N(C2CCCC2)c2nc(Nc3ncc(N4CCNCC4)cc3)ncc2C=1C	5.16	-3.22	1.76	literature	O=C(C)C=1C(=O)N(C2CCCC2)c2nc(Nc3ncc(N4CCNCC4)cc3)ncc2C=1C	1.161	103.35	447.543	105.04	0
FGFR3	FGFR3_30362749	Fluorescent ligand-binding assay	J Am Chem Soc.	Binding Kinetics Survey of the Drugged Kinome	30362749	Kinase	NA	PD153035 HCl	Brc1cc(Nc2ncnc3c2cc(OC)c(OC)c3)ccc1	5.49	-4.92	0.62	literature	Brc1cc(Nc2ncnc3c2cc(OC)c(OC)c3)ccc1	3.31974	56.27	360.211	56.27	0
FGFR3	FGFR3_30362749	Fluorescent ligand-binding assay	J Am Chem Soc.	Binding Kinetics Survey of the Drugged Kinome	30362749	Kinase	NA	PD173074	O=C(NC(C)(C)C)Nc1c(-c2cc(OC)cc(OC)c2)cc2c(n1)nc(NCCCCN(CC)CC)nc2	8.86	-6.45	2.41	literature	O=C(NC(C)(C)C)Nc1c(-c2cc(OC)cc(OC)c2)cc2c(n1)nc(NCCCCN(CC)CC)nc2	3.968	113.53	523.682	113.53	0
FGFR3	FGFR3_30362749	Fluorescent ligand-binding assay	J Am Chem Soc.	Binding Kinetics Survey of the Drugged Kinome	30362749	Kinase	NA	PF-00562271	S(=O)(=O)(N(C)c1c(CNc2c(C(F)(F)F)cnc(Nc3cc4c(NC(=O)C4)cc3)n2)cccn1)C	6.6	-5.05	1.48	literature	S(=O)(=O)(N(C)c1c(CNc2c(C(F)(F)F)cnc(Nc3cc4c(NC(=O)C4)cc3)n2)cccn1)C	1.07576	129.21	507.497	129.21	0
FGFR3	FGFR3_30362749	Fluorescent ligand-binding assay	J Am Chem Soc.	Binding Kinetics Survey of the Drugged Kinome	30362749	Kinase	NA	PF-03814735	FC(F)(F)c1c(NC2CCC2)nc(Nc2cc3[C@@H]4N(C(=O)CNC(=O)C)[C@H](c3cc2)CC4)nc1	8.5	-7.5	1.31	literature	FC(F)(F)c1c(NC2CCC2)nc(Nc2cc3[C@@H]4N(C(=O)CNC(=O)C)[C@H](c3cc2)CC4)nc1	2.73576	99.25	474.487	99.25	0
FGFR3	FGFR3_30362749	Fluorescent ligand-binding assay	J Am Chem Soc.	Binding Kinetics Survey of the Drugged Kinome	30362749	Kinase	NA	PHA-665752	Clc1c(CS(=O)(=O)c2cc3/C(=C/c4c(C)c(C(=O)N5[C@@H](CN6CCCC6)CCC5)c(C)[nH]4)/C(=O)Nc3cc2)c(Cl)ccc1	6.3	-5.97	0.35	literature	Clc1c(CS(=O)(=O)c2cc3/C(=C/c4c(C)c(C(=O)N5[C@@H](CN6CCCC6)CCC5)c(C)[nH]4)/C(=O)Nc3cc2)c(Cl)ccc1	5.282	102.58	641.62	102.58	0
FGFR3	FGFR3_30362749	Fluorescent ligand-binding assay	J Am Chem Soc.	Binding Kinetics Survey of the Drugged Kinome	30362749	Kinase	NA	PHA-680632	O=C(Nc1c(CC)cccc1CC)N1Cc2c(NC(=O)c3ccc(N4CCN(C)CC4)cc3)n[nH]c2C1	7.75	-5.82	1.93	literature	O=C(Nc1c(CC)cccc1CC)N1Cc2c(NC(=O)c3ccc(N4CCN(C)CC4)cc3)n[nH]c2C1	3.374	96.6	501.635	96.6	0
FGFR3	FGFR3_30362749	Fluorescent ligand-binding assay	J Am Chem Soc.	Binding Kinetics Survey of the Drugged Kinome	30362749	Kinase	NA	PP-121	Nc1ncnc2n(C3CCCC3)nc(-c3cnc4[nH]ccc4c3)c12	7.2	-6.78	0.38	literature	Nc1ncnc2n(C3CCCC3)nc(-c3cnc4[nH]ccc4c3)c12	1.75553	98.3	319.372	98.3	0
FGFR3	FGFR3_30362749	Fluorescent ligand-binding assay	J Am Chem Soc.	Binding Kinetics Survey of the Drugged Kinome	30362749	Kinase	NA	PP242	Oc1cc2c([nH]c(-c3nn(C(C)C)c4ncnc(N)c34)c2)cc1	6.58	-5.7	0.89	literature	Oc1cc2c([nH]c(-c3nn(C(C)C)c4ncnc(N)c34)c2)cc1	1.92806	105.64	308.345	105.64	0
FGFR3	FGFR3_30362749	Fluorescent ligand-binding assay	J Am Chem Soc.	Binding Kinetics Survey of the Drugged Kinome	30362749	Kinase	NA	Pelitinib (EKB-569)	Clc1c(F)ccc(Nc2c(C#N)cnc3c2cc(NC(=O)/C=C/CN(C)C)c(OCC)c3)c1	5.36	-4.28	1.08	literature	Clc1c(F)ccc(Nc2c(C#N)cnc3c2cc(NC(=O)/C=C/CN(C)C)c(OCC)c3)c1	3.98	90.28	467.932	90.28	0
FGFR3	FGFR3_30362749	Fluorescent ligand-binding assay	J Am Chem Soc.	Binding Kinetics Survey of the Drugged Kinome	30362749	Kinase	NA	Ponatinib (AP24534)	FC(F)(F)c1c(CN2CCN(C)CC2)ccc(NC(=O)c2cc(C#Cc3n4N=CC=Cc4nc3)c(C)cc2)c1	8.73	-5.77	2.96	literature	FC(F)(F)c1c(CN2CCN(C)CC2)ccc(NC(=O)c2cc(C#Cc3n4N=CC=Cc4nc3)c(C)cc2)c1	4.88476	65.76	532.57	65.77	4
FGFR3	FGFR3_30362749	Fluorescent ligand-binding assay	J Am Chem Soc.	Binding Kinetics Survey of the Drugged Kinome	30362749	Kinase	NA	R406	Fc1c(Nc2nc3NC(=O)C(C)(C)Oc3cc2)nc(Nc2cc(OC)c(OC)c(OC)c2)nc1	7.87	-6.77	1.01	literature	Fc1c(Nc2nc3NC(=O)C(C)(C)Oc3cc2)nc(Nc2cc(OC)c(OC)c(OC)c2)nc1	1.87148	128.75	470.461	128.75	2
FGFR3	FGFR3_30362749	Fluorescent ligand-binding assay	J Am Chem Soc.	Binding Kinetics Survey of the Drugged Kinome	30362749	Kinase	NA	R788 (Fostamatinib) - prodrug	P(=O)(OCN1C(=O)C(C)(C)Oc2c1nc(Nc1c(F)cnc(Nc3cc(OC)c(OC)c(OC)c3)n1)cc2)(O)O	6.07	-5.38	0.59	literature	P(=O)(OCN1C(=O)C(C)(C)Oc2c1nc(Nc1c(F)cnc(Nc3cc(OC)c(OC)c(OC)c3)n1)cc2)(O)O	0.59748	186.72	580.466	186.72	4
FGFR3	FGFR3_30362749	Fluorescent ligand-binding assay	J Am Chem Soc.	Binding Kinetics Survey of the Drugged Kinome	30362749	Kinase	NA	Saracatinib (AZD0530)	Clc1c(Nc2ncnc3c2c(OC2CCOCC2)cc(OCCN2CCN(C)CC2)c3)c2OCOc2cc1	5.33	-4.69	0.62	literature	Clc1c(Nc2ncnc3c2c(OC2CCOCC2)cc(OCCN2CCN(C)CC2)c3)c2OCOc2cc1	2.962	90.44	542.036	90.44	3
FGFR3	FGFR3_30362749	Fluorescent ligand-binding assay	J Am Chem Soc.	Binding Kinetics Survey of the Drugged Kinome	30362749	Kinase	NA	Semaxanib (SU5416)	O=C1/C(=C\c2c(C)cc(C)[nH]2)/c2c(N1)cccc2	6.44	-5.59	0.85	literature	O=C1/C(=C\c2c(C)cc(C)[nH]2)/c2c(N1)cccc2	2.562	44.89	238.29	44.89	3
FGFR3	FGFR3_30362749	Fluorescent ligand-binding assay	J Am Chem Soc.	Binding Kinetics Survey of the Drugged Kinome	30362749	Kinase	NA	Staurosporine	O(C)[C@@H]1[C@H](NC)C[C@H]2O[C@]1(C)n1c3c4n2c2c(c4c4C(=O)NCc4c3c3c1cccc3)cccc2	8.74	-7.42	1.31	literature	O(C)[C@@H]1[C@H](NC)C[C@H]2O[C@]1(C)n1c3c4n2c2c(c4c4C(=O)NCc4c3c3c1cccc3)cccc2	6.35953	69.45	466.541	69.45	0
FGFR3	FGFR3_30362749	Fluorescent ligand-binding assay	J Am Chem Soc.	Binding Kinetics Survey of the Drugged Kinome	30362749	Kinase	NA	TAE684 (NVP-TAE684)	Clc1c(Nc2c(S(=O)(=O)C(C)C)cccc2)nc(Nc2c(OC)cc(N3CCC(N4CCN(C)CC4)CC3)cc2)nc1	8.1	-6.87	1.25	literature	Clc1c(Nc2c(S(=O)(=O)C(C)C)cccc2)nc(Nc2c(OC)cc(N3CCC(N4CCN(C)CC4)CC3)cc2)nc1	3.959	102.93	614.215	102.93	0
FGFR3	FGFR3_30362749	Fluorescent ligand-binding assay	J Am Chem Soc.	Binding Kinetics Survey of the Drugged Kinome	30362749	Kinase	NA	TAK-901	S(=O)(=O)(CC)c1cc(-c2c3c(c(C)c(C(=O)NC4CCN(C)CC4)c2)[nH]c2ncc(C)cc32)ccc1	7.94	-6.6	1.34	literature	S(=O)(=O)(CC)c1cc(-c2c3c(c(C)c(C(=O)NC4CCN(C)CC4)c2)[nH]c2ncc(C)cc32)ccc1	4.722	95.16	504.655	95.16	1
FGFR3	FGFR3_30362749	Fluorescent ligand-binding assay	J Am Chem Soc.	Binding Kinetics Survey of the Drugged Kinome	30362749	Kinase	NA	TG101348 (SAR302503)	S(=O)(=O)(NC(C)(C)C)c1cc(Nc2c(C)cnc(Nc3ccc(OCCN4CCCC4)cc3)n2)ccc1	6.78	-5.61	1.07	literature	S(=O)(=O)(NC(C)(C)C)c1cc(Nc2c(C)cnc(Nc3ccc(OCCN4CCCC4)cc3)n2)ccc1	4.068	108.48	524.69	108.48	3
FGFR3	FGFR3_30362749	Fluorescent ligand-binding assay	J Am Chem Soc.	Binding Kinetics Survey of the Drugged Kinome	30362749	Kinase	NA	TSU-68 (SU6668)	O=C(O)CCc1c(C)c(/C=C/2\C(=O)Nc3c\2cccc3)[nH]c1C	6.28	-5.85	0.85	literature	O=C(O)CCc1c(C)c(/C=C/2\C(=O)Nc3c\2cccc3)[nH]c1C	2.374	82.19	310.353	82.19	0
FGFR3	FGFR3_30362749	Fluorescent ligand-binding assay	J Am Chem Soc.	Binding Kinetics Survey of the Drugged Kinome	30362749	Kinase	NA	Tie2 kinase inhibitor	[SH0](=O)(C)c1ccc(-c2[nH]c(c(-c3cc4c(cc(OC)cc4)cc3)n2)-c2ccncc2)cc1	5.29	-4.32	1.04	literature	[SH0](=O)(C)c1ccc(-c2[nH]c(c(-c3cc4c(cc(OC)cc4)cc3)n2)-c2ccncc2)cc1	3.936	87.08	439.539	67.87
FGFR3	FGFR3_30362749	Fluorescent ligand-binding assay	J Am Chem Soc.	Binding Kinetics Survey of the Drugged Kinome	30362749	Kinase	NA	Tivozanib (AV-951)	Clc1c(NC(=O)Nc2noc(C)c2)ccc(Oc2c3c(ncc2)cc(OC)c(OC)c3)c1	6.71	-5.99	0.68	literature	Clc1c(NC(=O)Nc2noc(C)c2)ccc(Oc2c3c(ncc2)cc(OC)c(OC)c3)c1	3.61574	107.74	454.87	107.74	3
FGFR3	FGFR3_30362749	Fluorescent ligand-binding assay	J Am Chem Soc.	Binding Kinetics Survey of the Drugged Kinome	30362749	Kinase	NA	Tofacitinib (CP-690550 - Tasocitinib)	O=C(CC#N)N1C[C@H](N(C)c2ncnc3[nH]ccc23)[C@H](C)CC1	5.36	-4.9	0.46	literature	O=C(CC#N)N1C[C@H](N(C)c2ncnc3[nH]ccc23)[C@H](C)CC1	0.175	88.91	312.377	88.91	0
FGFR3	FGFR3_30362749	Fluorescent ligand-binding assay	J Am Chem Soc.	Binding Kinetics Survey of the Drugged Kinome	30362749	Kinase	NA	U0126-EtOH	S(/C(/N)=C(\C#N)/C(/C#N)=C(/Sc1c(N)cccc1)\N)c1c(N)cccc1	6.12	-2.65	2.61	literature	S(/C(/N)=C(\C#N)/C(/C#N)=C(/Sc1c(N)cccc1)\N)c1c(N)cccc1	2.8	151.66	380.5	151.66	0
FGFR3	FGFR3_30362749	Fluorescent ligand-binding assay	J Am Chem Soc.	Binding Kinetics Survey of the Drugged Kinome	30362749	Kinase	NA	Vemurafenib (PLX4032)	Clc1ccc(-c2cnc3[nH]cc(C(=O)c4c(F)c(NS(=O)(=O)CCC)ccc4F)c3c2)cc1	5.13	-3.26	1.88	literature	Clc1ccc(-c2cnc3[nH]cc(C(=O)c4c(F)c(NS(=O)(=O)CCC)ccc4F)c3c2)cc1	5.54	91.92	489.93	91.92	4
FGFR3	FGFR3_30362749	Fluorescent ligand-binding assay	J Am Chem Soc.	Binding Kinetics Survey of the Drugged Kinome	30362749	Kinase	NA	WHI-P154	Brc1c(O)ccc(Nc2ncnc3c2cc(OC)c(OC)c3)c1	5.72	-4.58	1.13	literature	Brc1c(O)ccc(Nc2ncnc3c2cc(OC)c(OC)c3)c1	3.00974	76.5	376.21	76.5	0
FGFR3	FGFR3_30362749	Fluorescent ligand-binding assay	J Am Chem Soc.	Binding Kinetics Survey of the Drugged Kinome	30362749	Kinase	NA	WZ3146	Clc1c(Oc2cc(NC(=O)C=C)ccc2)nc(Nc2ccc(N3CCN(C)CC3)cc2)nc1	6.77	-6.06	0.71	literature	Clc1c(Oc2cc(NC(=O)C=C)ccc2)nc(Nc2ccc(N3CCN(C)CC3)cc2)nc1	3.187	82.62	464.957	82.62	0
FGFR3	FGFR3_30362749	Fluorescent ligand-binding assay	J Am Chem Soc.	Binding Kinetics Survey of the Drugged Kinome	30362749	Kinase	NA	WZ8040	Clc1c(Sc2cc(NC(=O)C=C)ccc2)nc(Nc2ccc(N3CCN(C)CC3)cc2)nc1	6.7	-5.41	0.97	literature	Clc1c(Sc2cc(NC(=O)C=C)ccc2)nc(Nc2ccc(N3CCN(C)CC3)cc2)nc1	3.823	73.39	481.024	73.39	0
FGFR4	FGFR4_30362749	Fluorescent ligand-binding assay	J Am Chem Soc.	Binding Kinetics Survey of the Drugged Kinome	30362749	Kinase	NA	AEE788 (NVP-AEE788)	N([C@H](C)c1ccccc1)c1ncnc2[nH]c(-c3ccc(CN4CCN(CC)CC4)cc3)cc12	5.27	-4.35	1.03	literature	N([C@H](C)c1ccccc1)c1ncnc2[nH]c(-c3ccc(CN4CCN(CC)CC4)cc3)cc12	4.119	60.08	440.595	60.08	0
FGFR4	FGFR4_30362749	Fluorescent ligand-binding assay	J Am Chem Soc.	Binding Kinetics Survey of the Drugged Kinome	30362749	Kinase	NA	AT9283	O=C(Nc1c(-c2[nH]c3c(n2)cc(CN2CCOCC2)cc3)n[nH]c1)NC1CC1	6.15	-4.95	1.07	literature	O=C(Nc1c(-c2[nH]c3c(n2)cc(CN2CCOCC2)cc3)n[nH]c1)NC1CC1	1.13706	110.96	381.44	110.96
FGFR4	FGFR4_30362749	Fluorescent ligand-binding assay	J Am Chem Soc.	Binding Kinetics Survey of the Drugged Kinome	30362749	Kinase	NA	AZ 960	Fc1c(Nc2n[nH]c(C)c2)nc(N[C@@H](C)c2ccc(F)cc2)c(C#N)c1	5.9	-5.25	0.62	literature	Fc1c(Nc2n[nH]c(C)c2)nc(N[C@@H](C)c2ccc(F)cc2)c(C#N)c1	3.894	89.42	354.364	89.42	0
FGFR4	FGFR4_30362749	Fluorescent ligand-binding assay	J Am Chem Soc.	Binding Kinetics Survey of the Drugged Kinome	30362749	Kinase	NA	AZ628	O=C(Nc1cc(Nc2cc3C(=O)N(C)C=Nc3cc2)c(C)cc1)c1cc(C(C#N)(C)C)ccc1	5.43	-3.23	2.23	literature	O=C(Nc1cc(Nc2cc3C(=O)N(C)C=Nc3cc2)c(C)cc1)c1cc(C(C#N)(C)C)ccc1	4.957	97.59	451.53	99.81	0
FGFR4	FGFR4_30362749	Fluorescent ligand-binding assay	J Am Chem Soc.	Binding Kinetics Survey of the Drugged Kinome	30362749	Kinase	NA	AZD2014	O=C(NC)c1cc(-c2nc3nc(N4[C@@H](C)COCC4)nc(N4[C@@H](C)COCC4)c3cc2)ccc1	4.87	-3.71	0.99	literature	O=C(NC)c1cc(-c2nc3nc(N4[C@@H](C)COCC4)nc(N4[C@@H](C)COCC4)c3cc2)ccc1	1.857	92.71	462.554	92.71	2
FGFR4	FGFR4_30362749	Fluorescent ligand-binding assay	J Am Chem Soc.	Binding Kinetics Survey of the Drugged Kinome	30362749	Kinase	NA	AZD4547	O=C(Nc1n[nH]c(CCc2cc(OC)cc(OC)c2)c1)c1ccc(N2C[C@@H](C)N[C@@H](C)C2)cc1	7.77	-6.74	1.03	literature	O=C(Nc1n[nH]c(CCc2cc(OC)cc(OC)c2)c1)c1ccc(N2C[C@@H](C)N[C@@H](C)C2)cc1	3.948	91.51	463.582	91.51	2
FGFR4	FGFR4_30362749	Fluorescent ligand-binding assay	J Am Chem Soc.	Binding Kinetics Survey of the Drugged Kinome	30362749	Kinase	NA	AZD7762	Fc1cc(-c2sc(C(=O)N[C@@H]3CNCCC3)c(NC(=O)N)c2)ccc1	5.25	-4.72	0.47	literature	Fc1cc(-c2sc(C(=O)N[C@@H]3CNCCC3)c(NC(=O)N)c2)ccc1	1.64	96.25	362.429	96.25	0
FGFR4	FGFR4_30362749	Fluorescent ligand-binding assay	J Am Chem Soc.	Binding Kinetics Survey of the Drugged Kinome	30362749	Kinase	NA	Amuvatinib (MP-470)	S=C(NCc1cc2OCOc2cc1)N1CCN(c2ncnc3c2oc2c3cccc2)CC1	4.81	-3.34	1.27	literature	S=C(NCc1cc2OCOc2cc1)N1CCN(c2ncnc3c2oc2c3cccc2)CC1	2.59	107.98	447.519	75.89	0
FGFR4	FGFR4_30362749	Fluorescent ligand-binding assay	J Am Chem Soc.	Binding Kinetics Survey of the Drugged Kinome	30362749	Kinase	NA	Apatinib (YN968D1)	S(=O)(=O)([O-])C.O=C(Nc1ccc(C2(C#N)CCCC2)cc1)c1c([N+H2]c2c(C)ccnc2)nccc1	5.32	-4.21	1.16	literature	O=C(Nc1ccc(C2(C#N)CCCC2)cc1)c1c(Nc2c(C)ccnc2)nccc1	3.989	90.7	397.482	90.7
FGFR4	FGFR4_30362749	Fluorescent ligand-binding assay	J Am Chem Soc.	Binding Kinetics Survey of the Drugged Kinome	30362749	Kinase	NA	Axitinib	S(c1c(C(=O)NC)cccc1)c1cc2[nH]nc(/C=C/c3ncccc3)c2cc1	5.86	-5.27	0.7	literature	S(c1c(C(=O)NC)cccc1)c1cc2[nH]nc(/C=C/c3ncccc3)c2cc1	4.643	70.67	386.479	70.67	0
FGFR4	FGFR4_30362749	Fluorescent ligand-binding assay	J Am Chem Soc.	Binding Kinetics Survey of the Drugged Kinome	30362749	Kinase	NA	BGJ398 (NVP-BGJ398)	Clc1c(NC(=O)N(C)c2ncnc(Nc3ccc(N4CCN(CC)CC4)cc3)c2)c(Cl)c(OC)cc1OC	7.91	-6.86	1.08	literature	Clc1c(NC(=O)N(C)c2ncnc(Nc3ccc(N4CCN(CC)CC4)cc3)c2)c(Cl)c(OC)cc1OC	3.451	95.09	560.486	95.09	3
FGFR4	FGFR4_30362749	Fluorescent ligand-binding assay	J Am Chem Soc.	Binding Kinetics Survey of the Drugged Kinome	30362749	Kinase	NA	BIBF1120 (Vargatef)	O=C(N(C)c1ccc(N/C(/c2ccccc2)=C/2\C(=O)Nc3c\2ccc(C(=O)OC)c3)cc1)CN1CCN(C)CC1	6.25	-5.86	0.47	literature	O=C(N(C)c1ccc(N/C(/c2ccccc2)=C/2\C(=O)Nc3c\2ccc(C(=O)OC)c3)cc1)CN1CCN(C)CC1	3.507	94.22	539.636	94.22	0
FGFR4	FGFR4_30362749	Fluorescent ligand-binding assay	J Am Chem Soc.	Binding Kinetics Survey of the Drugged Kinome	30362749	Kinase	NA	BIRB 796 (Doramapimod)	O=C(Nc1n(-c2ccc(C)cc2)nc(C(C)(C)C)c1)Nc1c2c(c(OCCN3CCOCC3)cc1)cccc2	5.35	-3.43	1.94	literature	O=C(Nc1n(-c2ccc(C)cc2)nc(C(C)(C)C)c1)Nc1c2c(c(OCCN3CCOCC3)cc1)cccc2	4.943	80.65	527.669	80.65	2
FGFR4	FGFR4_30362749	Fluorescent ligand-binding assay	J Am Chem Soc.	Binding Kinetics Survey of the Drugged Kinome	30362749	Kinase	NA	BIX 02188	O=C(N)c1cc2NC(=O)/C(=C(\Nc3cc(CN(C)C)ccc3)/c3ccccc3)/c2cc1	5	-3.37	1.65	literature	O=C(N)c1cc2NC(=O)/C(=C(\Nc3cc(CN(C)C)ccc3)/c3ccccc3)/c2cc1	3.831	87.46	412.493	87.46	0
FGFR4	FGFR4_30362749	Fluorescent ligand-binding assay	J Am Chem Soc.	Binding Kinetics Survey of the Drugged Kinome	30362749	Kinase	NA	BIX 02189	O=C(N(C)C)c1cc2NC(=O)/C(=C(\Nc3cc(CN(C)C)ccc3)/c3ccccc3)/c2cc1	5.11	-4.18	0.93	literature	O=C(N(C)C)c1cc2NC(=O)/C(=C(\Nc3cc(CN(C)C)ccc3)/c3ccccc3)/c2cc1	4.384	64.68	440.547	64.68	0
FGFR4	FGFR4_30362749	Fluorescent ligand-binding assay	J Am Chem Soc.	Binding Kinetics Survey of the Drugged Kinome	30362749	Kinase	NA	BX-795	Ic1c(NCCCNC(=O)c2sccc2)nc(Nc2cc(NC(=O)N3CCCC3)ccc2)nc1	5.77	-4.67	1.1	literature	Ic1c(NCCCNC(=O)c2sccc2)nc(Nc2cc(NC(=O)N3CCCC3)ccc2)nc1	3.106	111.28	591.478	111.28	0
FGFR4	FGFR4_30362749	Fluorescent ligand-binding assay	J Am Chem Soc.	Binding Kinetics Survey of the Drugged Kinome	30362749	Kinase	NA	BX-912	Brc1c(NCCc2[nH]cnc2)nc(Nc2cc(NC(=O)N3CCCC3)ccc2)nc1	6.27	-5.17	0.89	literature	Brc1c(NCCc2[nH]cnc2)nc(Nc2cc(NC(=O)N3CCCC3)ccc2)nc1	1.234	110.86	471.363	110.86	0
FGFR4	FGFR4_30362749	Fluorescent ligand-binding assay	J Am Chem Soc.	Binding Kinetics Survey of the Drugged Kinome	30362749	Kinase	NA	Baricitinib (LY3009104 - incb28050)	S(=O)(=O)(CC)N1CC(CC#N)(n2ncc(-c3ncnc4[nH]ccc34)c2)C1	5.38	-4.06	1.26	literature	S(=O)(=O)(CC)N1CC(CC#N)(n2ncc(-c3ncnc4[nH]ccc34)c2)C1	-1.528	120.56	371.425	120.56	4
FGFR4	FGFR4_30362749	Fluorescent ligand-binding assay	J Am Chem Soc.	Binding Kinetics Survey of the Drugged Kinome	30362749	Kinase	NA	Bosutinib (SKI-606)	Clc1c(OC)cc(Nc2c(C#N)cnc3c2cc(OC)c(OCCCN2CCN(C)CC2)c3)c(Cl)c1	5.24	-4.86	0.4	literature	Clc1c(OC)cc(Nc2c(C#N)cnc3c2cc(OC)c(OCCCN2CCN(C)CC2)c3)c(Cl)c1	3.93474	82.88	530.456	82.88	4
FGFR4	FGFR4_30362749	Fluorescent ligand-binding assay	J Am Chem Soc.	Binding Kinetics Survey of the Drugged Kinome	30362749	Kinase	NA	Brivanib (BMS-540215)	Fc1c(OC2=NC=Nn3c2c(C)c(OC[C@H](O)C)c3)ccc2[nH]c(C)cc12	6.01	-4.91	1.08	literature	Fc1c(OC2=NC=Nn3c2c(C)c(OC[C@H](O)C)c3)ccc2[nH]c(C)cc12	3.21	84.13	370.384	84.67	0
FGFR4	FGFR4_30362749	Fluorescent ligand-binding assay	J Am Chem Soc.	Binding Kinetics Survey of the Drugged Kinome	30362749	Kinase	NA	CEP33779	S(=O)(=O)(C)c1ccc(C=2c3n(nc(Nc4cc(N5CCN(C)CC5)ccc4)n3)C=CC=2)cc1	5.14	-4.59	0.58	literature	S(=O)(=O)(C)c1ccc(C=2c3n(nc(Nc4cc(N5CCN(C)CC5)ccc4)n3)C=CC=2)cc1	1.624	83.36	462.578	82.84	0
FGFR4	FGFR4_30362749	Fluorescent ligand-binding assay	J Am Chem Soc.	Binding Kinetics Survey of the Drugged Kinome	30362749	Kinase	NA	CYC116	N(c1nc(-c2c(C)nc(N)s2)ccn1)c1ccc(N2CCOCC2)cc1	5.84	-5.1	0.74	literature	N(c1nc(-c2c(C)nc(N)s2)ccn1)c1ccc(N2CCOCC2)cc1	1.126	89.19	368.465	89.19	1
FGFR4	FGFR4_30362749	Fluorescent ligand-binding assay	J Am Chem Soc.	Binding Kinetics Survey of the Drugged Kinome	30362749	Kinase	NA	Cediranib (AZD2171)	Fc1c(Oc2ncnc3c2cc(OC)c(OCCCN2CCCC2)c3)ccc2[nH]c(C)cc12	6.2	-5.74	0.48	literature	Fc1c(Oc2ncnc3c2cc(OC)c(OCCCN2CCCC2)c3)ccc2[nH]c(C)cc12	4.21274	72.5	450.514	72.5	3
FGFR4	FGFR4_30362749	Fluorescent ligand-binding assay	J Am Chem Soc.	Binding Kinetics Survey of the Drugged Kinome	30362749	Kinase	NA	Cyt387	O=C(NCC#N)c1ccc(-c2nc(Nc3ccc(N4CCOCC4)cc3)ncc2)cc1	5.72	-5.09	0.65	literature	O=C(NCC#N)c1ccc(-c2nc(Nc3ccc(N4CCOCC4)cc3)ncc2)cc1	1.468	103.17	414.469	103.17	3
FGFR4	FGFR4_30362749	Fluorescent ligand-binding assay	J Am Chem Soc.	Binding Kinetics Survey of the Drugged Kinome	30362749	Kinase	NA	Danusertib (PHA-739358)	O=C([C@H](OC)c1ccccc1)N1Cc2c(NC(=O)c3ccc(N4CCN(C)CC4)cc3)n[nH]c2C1	5.64	-4.69	0.93	literature	O=C([C@H](OC)c1ccccc1)N1Cc2c(NC(=O)c3ccc(N4CCN(C)CC4)cc3)n[nH]c2C1	2.235	93.8	474.565	93.8	0
FGFR4	FGFR4_30362749	Fluorescent ligand-binding assay	J Am Chem Soc.	Binding Kinetics Survey of the Drugged Kinome	30362749	Kinase	NA	Dasatinib (BMS-354825)	Clc1c(NC(=O)c2sc(Nc3nc(C)nc(N4CCN(CCO)CC4)c3)nc2)c(C)ccc1	4.99	-4.16	0.84	literature	Clc1c(NC(=O)c2sc(Nc3nc(C)nc(N4CCN(CCO)CC4)c3)nc2)c(C)ccc1	1.535	106.51	488.016	106.51	4
FGFR4	FGFR4_30362749	Fluorescent ligand-binding assay	J Am Chem Soc.	Binding Kinetics Survey of the Drugged Kinome	30362749	Kinase	NA	Desmethyl Erlotinib (CP-473420)	O(CCOc1c(OCCO)cc2c(Nc3cc(C#C)ccc3)ncnc2c1)C	4.99	-3.96	1.11	literature	O(CCOc1c(OCCO)cc2c(Nc3cc(C#C)ccc3)ncnc2c1)C	1.97548	85.73	379.416	85.73	0
FGFR4	FGFR4_30362749	Fluorescent ligand-binding assay	J Am Chem Soc.	Binding Kinetics Survey of the Drugged Kinome	30362749	Kinase	NA	Dovitinib (TKI-258)	Fc1c2C(N)=C(c3[nH]c4c(n3)ccc(N3CCN(C)CC3)c4)C(=O)Nc2ccc1	6.36	-5.92	0.51	literature	Fc1c2C(N)=C(c3[nH]c4c(n3)ccc(N3CCN(C)CC3)c4)C(=O)Nc2ccc1	1.59	90.28	392.438	94.04	3
FGFR4	FGFR4_30362749	Fluorescent ligand-binding assay	J Am Chem Soc.	Binding Kinetics Survey of the Drugged Kinome	30362749	Kinase	NA	E7080 (Lenvatinib)	Clc1c(NC(=O)NC2CC2)ccc(Oc2c3c(ncc2)cc(OC)c(C(=O)N)c3)c1	6.93	-5.7	1.23	literature	Clc1c(NC(=O)NC2CC2)ccc(Oc2c3c(ncc2)cc(OC)c(C(=O)N)c3)c1	2.902	115.57	426.86	115.57	0
FGFR4	FGFR4_30362749	Fluorescent ligand-binding assay	J Am Chem Soc.	Binding Kinetics Survey of the Drugged Kinome	30362749	Kinase	NA	Erlotinib HCl	O(CCOc1c(OCCOC)cc2ncnc(Nc3cc(C#C)ccc3)c2c1)C	4.74	-3.98	0.64	literature	O(CCOc1c(OCCOC)cc2ncnc(Nc3cc(C#C)ccc3)c2c1)C	2.33922	74.73	393.443	74.73	4
FGFR4	FGFR4_30362749	Fluorescent ligand-binding assay	J Am Chem Soc.	Binding Kinetics Survey of the Drugged Kinome	30362749	Kinase	NA	GSK1070916	O=C(N(C)C)Nc1ccc(-c2c(-c3c4c([nH]c(-c5cc(CN(C)C)ccc5)c4)ncc3)cn(CC)n2)cc1	5.21	-4.22	0.95	literature	O=C(N(C)C)Nc1ccc(-c2c(-c3c4c([nH]c(-c5cc(CN(C)C)ccc5)c4)ncc3)cn(CC)n2)cc1	4.46	82.08	507.642	82.08	1
FGFR4	FGFR4_30362749	Fluorescent ligand-binding assay	J Am Chem Soc.	Binding Kinetics Survey of the Drugged Kinome	30362749	Kinase	NA	GSK2126458	S(=O)(=O)(Nc1c(OC)ncc(-c2cc3c(-c4cnncc4)ccnc3cc2)c1)c1c(F)cc(F)cc1	4.9	-3.82	0.99	literature	S(=O)(=O)(Nc1c(OC)ncc(-c2cc3c(-c4cnncc4)ccnc3cc2)c1)c1c(F)cc(F)cc1	5.321	106.96	505.505	106.96	1
FGFR4	FGFR4_30362749	Fluorescent ligand-binding assay	J Am Chem Soc.	Binding Kinetics Survey of the Drugged Kinome	30362749	Kinase	NA	Golvatinib (E7050)	Fc1c(NC(=O)C2(C(=O)Nc3ccc(F)cc3)CC2)ccc(Oc2cc(NC(=O)N3CCC(N4CCN(C)CC4)CC3)ncc2)c1	4.68	-3.92	0.85	literature	Fc1c(NC(=O)C2(C(=O)Nc3ccc(F)cc3)CC2)ccc(Oc2cc(NC(=O)N3CCC(N4CCN(C)CC4)CC3)ncc2)c1	3.17	119.14	633.7	119.14	0
FGFR4	FGFR4_30362749	Fluorescent ligand-binding assay	J Am Chem Soc.	Binding Kinetics Survey of the Drugged Kinome	30362749	Kinase	NA	IC-87114	O=C1N(c2c(C)cccc2)C(Cn2c3ncnc(N)c3nc2)=Nc2c1c(C)ccc2	4.89	-4.09	0.84	literature	O=C1N(c2c(C)cccc2)C(Cn2c3ncnc(N)c3nc2)=Nc2c1c(C)ccc2	2.58006	102.29	397.442	104.51	0
FGFR4	FGFR4_30362749	Fluorescent ligand-binding assay	J Am Chem Soc.	Binding Kinetics Survey of the Drugged Kinome	30362749	Kinase	NA	INK 128 (MLN0128)	Nc1oc2c(n1)cc(-c1nn(C(C)C)c3ncnc(N)c13)cc2	5.53	-4.85	0.68	literature	Nc1oc2c(n1)cc(-c1nn(C(C)C)c3ncnc(N)c13)cc2	0.97853	121.67	309.333	121.67	0
FGFR4	FGFR4_30362749	Fluorescent ligand-binding assay	J Am Chem Soc.	Binding Kinetics Survey of the Drugged Kinome	30362749	Kinase	NA	Imatinib (Gleevec)	O=C(Nc1cc(Nc2nc(-c3cnccc3)ccn2)c(C)cc1)c1ccc(CN2CCN(C)CC2)cc1	4.83	-4.29	0.46	literature	O=C(Nc1cc(Nc2nc(-c3cnccc3)ccn2)c(C)cc1)c1ccc(CN2CCN(C)CC2)cc1	2.827	86.28	493.615	86.28	0
FGFR4	FGFR4_30362749	Fluorescent ligand-binding assay	J Am Chem Soc.	Binding Kinetics Survey of the Drugged Kinome	30362749	Kinase	NA	KRN 633	Clc1c(NC(=O)NCCC)ccc(Oc2ncnc3c2cc(OC)c(OC)c3)c1	4.85	-3.47	1.33	literature	Clc1c(NC(=O)NCCC)ccc(Oc2ncnc3c2cc(OC)c(OC)c3)c1	3.22974	94.6	416.865	94.6	1
FGFR4	FGFR4_30362749	Fluorescent ligand-binding assay	J Am Chem Soc.	Binding Kinetics Survey of the Drugged Kinome	30362749	Kinase	NA	LY2228820	Fc1ccc(-c2c(-c3nc4n(CC(C)(C)C)c(N)nc4cc3)[nH]c(C(C)(C)C)n2)cc1	4.77	-2.97	1.78	literature	Fc1ccc(-c2c(-c3nc4n(CC(C)(C)C)c(N)nc4cc3)[nH]c(C(C)(C)C)n2)cc1	5.51406	85.41	420.536	85.41	2
FGFR4	FGFR4_30362749	Fluorescent ligand-binding assay	J Am Chem Soc.	Binding Kinetics Survey of the Drugged Kinome	30362749	Kinase	NA	LY2784544	Clc1cc(F)c(Cc2c(C)nc3C(CN4CCOCC4)=CC(Nc4n[nH]c(C)c4)=Nn23)cc1	5.5	-4.7	0.83	literature	Clc1cc(F)c(Cc2c(C)nc3C(CN4CCOCC4)=CC(Nc4n[nH]c(C)c4)=Nn23)cc1	3.368	83.36	469.952	83.37	2
FGFR4	FGFR4_30362749	Fluorescent ligand-binding assay	J Am Chem Soc.	Binding Kinetics Survey of the Drugged Kinome	30362749	Kinase	NA	Linifanib (ABT-869)	Fc1c(NC(=O)Nc2ccc(-c3c4c(N)n[nH]c4ccc3)cc2)cc(C)cc1	4.87	-3.89	1.16	literature	Fc1c(NC(=O)Nc2ccc(-c3c4c(N)n[nH]c4ccc3)cc2)cc(C)cc1	4.535	95.83	375.407	95.83	3
FGFR4	FGFR4_30362749	Fluorescent ligand-binding assay	J Am Chem Soc.	Binding Kinetics Survey of the Drugged Kinome	30362749	Kinase	NA	Linsitinib (OSI-906)	OC1(C)CC(c2n3c(c(-c4cc5nc(-c6ccccc6)ccc5cc4)n2)C(N)=NC=C3)C1	5.07	-3.4	1.65	literature	OC1(C)CC(c2n3c(c(-c4cc5nc(-c6ccccc6)ccc5cc4)n2)C(N)=NC=C3)C1	3.405	89.32	421.504	89.33	0
FGFR4	FGFR4_30362749	Fluorescent ligand-binding assay	J Am Chem Soc.	Binding Kinetics Survey of the Drugged Kinome	30362749	Kinase	NA	MK-5108 (VX-689)	Clc1c(F)c(OC2CCC(C(=O)O)(Cc3nc(Nc4sccn4)ccc3)CC2)ccc1	6.01	-5.12	0.89	literature	Clc1c(F)c(OC2CCC(C(=O)O)(Cc3nc(Nc4sccn4)ccc3)CC2)ccc1	4.806	84.34	461.945	84.34	0
FGFR4	FGFR4_30362749	Fluorescent ligand-binding assay	J Am Chem Soc.	Binding Kinetics Survey of the Drugged Kinome	30362749	Kinase	NA	MLN8054	Clc1cc2C(c3c(F)cccc3F)=NCc3c(nc(Nc4ccc(C(=O)O)cc4)nc3)-c2cc1	5.41	-4.23	1.25	literature	Clc1cc2C(c3c(F)cccc3F)=NCc3c(nc(Nc4ccc(C(=O)O)cc4)nc3)-c2cc1	5.189	87.47	476.87	87.47	0
FGFR4	FGFR4_30362749	Fluorescent ligand-binding assay	J Am Chem Soc.	Binding Kinetics Survey of the Drugged Kinome	30362749	Kinase	NA	MLN8237 (Alisertib)	Clc1cc2C(c3c(F)cccc3OC)=NCc3c(nc(Nc4cc(OC)c(C(=O)O)cc4)nc3)-c2cc1	5.39	-4.42	0.98	literature	Clc1cc2C(c3c(F)cccc3OC)=NCc3c(nc(Nc4cc(OC)c(C(=O)O)cc4)nc3)-c2cc1	4.983	105.93	518.932	105.93	3
FGFR4	FGFR4_30362749	Fluorescent ligand-binding assay	J Am Chem Soc.	Binding Kinetics Survey of the Drugged Kinome	30362749	Kinase	NA	Milciclib (PHA-848125)	O=C(NC)c1nn(C)c-2c1C(C)(C)Cc1c-2nc(Nc2ccc(N3CCN(C)CC3)cc2)nc1	5.46	-4.4	0.96	literature	O=C(NC)c1nn(C)c-2c1C(C)(C)Cc1c-2nc(Nc2ccc(N3CCN(C)CC3)cc2)nc1	0.92053	91.21	460.586	91.21	1
FGFR4	FGFR4_30362749	Fluorescent ligand-binding assay	J Am Chem Soc.	Binding Kinetics Survey of the Drugged Kinome	30362749	Kinase	NA	Motesanib Diphosphate (AMG-706)	O=C(Nc1cc2NCC(C)(C)c2cc1)c1c(NCc2ccncc2)nccc1	5.86	-4.59	1.26	literature	O=C(Nc1cc2NCC(C)(C)c2cc1)c1c(NCc2ccncc2)nccc1	2.549	78.94	373.46	78.94	3
FGFR4	FGFR4_30362749	Fluorescent ligand-binding assay	J Am Chem Soc.	Binding Kinetics Survey of the Drugged Kinome	30362749	Kinase	NA	NVP-ADW742	O(Cc1ccccc1)c1cc(-c2c3c(N)ncnc3n(C3CC(CN4CCCC4)C3)c2)ccc1	5.38	-3.81	1.58	literature	O(Cc1ccccc1)c1cc(-c2c3c(N)ncnc3n(C3CC(CN4CCCC4)C3)c2)ccc1	5.319	69.2	453.59	69.2	0
FGFR4	FGFR4_30362749	Fluorescent ligand-binding assay	J Am Chem Soc.	Binding Kinetics Survey of the Drugged Kinome	30362749	Kinase	NA	NVP-TAE226	Clc1c(Nc2c(C(=O)NC)cccc2)nc(Nc2c(OC)cc(N3CCOCC3)cc2)nc1	6.92	-5.8	1.11	literature	Clc1c(Nc2c(C(=O)NC)cccc2)nc(Nc2c(OC)cc(N3CCOCC3)cc2)nc1	2.424	100.64	468.945	100.64	0
FGFR4	FGFR4_30362749	Fluorescent ligand-binding assay	J Am Chem Soc.	Binding Kinetics Survey of the Drugged Kinome	30362749	Kinase	NA	PCI-32765 (Ibrutinib)	O=C(C=C)N1C[C@H](n2nc(-c3ccc(Oc4ccccc4)cc3)c3c(N)ncnc23)CCC1	5.52	-4.87	0.62	literature	O=C(C=C)N1C[C@H](n2nc(-c3ccc(Oc4ccccc4)cc3)c3c(N)ncnc23)CCC1	3.24753	99.16	440.507	99.16	0
FGFR4	FGFR4_30362749	Fluorescent ligand-binding assay	J Am Chem Soc.	Binding Kinetics Survey of the Drugged Kinome	30362749	Kinase	NA	PD173074	O=C(NC(C)(C)C)Nc1c(-c2cc(OC)cc(OC)c2)cc2c(n1)nc(NCCCCN(CC)CC)nc2	6.58	-5.81	0.76	literature	O=C(NC(C)(C)C)Nc1c(-c2cc(OC)cc(OC)c2)cc2c(n1)nc(NCCCCN(CC)CC)nc2	3.968	113.53	523.682	113.53	0
FGFR4	FGFR4_30362749	Fluorescent ligand-binding assay	J Am Chem Soc.	Binding Kinetics Survey of the Drugged Kinome	30362749	Kinase	NA	PF-00562271	S(=O)(=O)(N(C)c1c(CNc2c(C(F)(F)F)cnc(Nc3cc4c(NC(=O)C4)cc3)n2)cccn1)C	5.62	-4.48	1.13	literature	S(=O)(=O)(N(C)c1c(CNc2c(C(F)(F)F)cnc(Nc3cc4c(NC(=O)C4)cc3)n2)cccn1)C	1.07576	129.21	507.497	129.21	0
FGFR4	FGFR4_30362749	Fluorescent ligand-binding assay	J Am Chem Soc.	Binding Kinetics Survey of the Drugged Kinome	30362749	Kinase	NA	PHA-680632	O=C(Nc1c(CC)cccc1CC)N1Cc2c(NC(=O)c3ccc(N4CCN(C)CC4)cc3)n[nH]c2C1	6.16	-5.47	0.69	literature	O=C(Nc1c(CC)cccc1CC)N1Cc2c(NC(=O)c3ccc(N4CCN(C)CC4)cc3)n[nH]c2C1	3.374	96.6	501.635	96.6	0
FGFR4	FGFR4_30362749	Fluorescent ligand-binding assay	J Am Chem Soc.	Binding Kinetics Survey of the Drugged Kinome	30362749	Kinase	NA	PIK-75	BrC1=Cn2c(/C=N/N(S(=O)(=O)c3c(C)ccc([N+](=O)[O-])c3)C)cnc2C=C1	5.29	-4.56	0.62	literature	BrC1=Cn2c(/C=N/N(S(=O)(=O)c3c(C)ccc([N+](=O)[O-])c3)C)cnc2C=C1	3.093	113.38	452.289	110.18	0
FGFR4	FGFR4_30362749	Fluorescent ligand-binding assay	J Am Chem Soc.	Binding Kinetics Survey of the Drugged Kinome	30362749	Kinase	NA	PP-121	Nc1ncnc2n(C3CCCC3)nc(-c3cnc4[nH]ccc4c3)c12	6.55	-6.05	0.52	literature	Nc1ncnc2n(C3CCCC3)nc(-c3cnc4[nH]ccc4c3)c12	1.75553	98.3	319.372	98.3	0
FGFR4	FGFR4_30362749	Fluorescent ligand-binding assay	J Am Chem Soc.	Binding Kinetics Survey of the Drugged Kinome	30362749	Kinase	NA	PP242	Oc1cc2c([nH]c(-c3nn(C(C)C)c4ncnc(N)c34)c2)cc1	6.02	-4.84	1.18	literature	Oc1cc2c([nH]c(-c3nn(C(C)C)c4ncnc(N)c34)c2)cc1	1.92806	105.64	308.345	105.64	0
FGFR4	FGFR4_30362749	Fluorescent ligand-binding assay	J Am Chem Soc.	Binding Kinetics Survey of the Drugged Kinome	30362749	Kinase	NA	Pazopanib HCl	S(=O)(=O)(N)c1c(C)ccc(Nc2nc(N(C)c3cc4nn(C)c(C)c4cc3)ccn2)c1	6.39	-5.36	1.03	literature	S(=O)(=O)(N)c1c(C)ccc(Nc2nc(N(C)c3cc4nn(C)c(C)c4cc3)ccn2)c1	1.865	119.03	437.528	119.03	4
FGFR4	FGFR4_30362749	Fluorescent ligand-binding assay	J Am Chem Soc.	Binding Kinetics Survey of the Drugged Kinome	30362749	Kinase	NA	Ponatinib (AP24534)	FC(F)(F)c1c(CN2CCN(C)CC2)ccc(NC(=O)c2cc(C#Cc3n4N=CC=Cc4nc3)c(C)cc2)c1	7.09	-5.22	1.88	literature	FC(F)(F)c1c(CN2CCN(C)CC2)ccc(NC(=O)c2cc(C#Cc3n4N=CC=Cc4nc3)c(C)cc2)c1	4.88476	65.76	532.57	65.77	4
FGFR4	FGFR4_30362749	Fluorescent ligand-binding assay	J Am Chem Soc.	Binding Kinetics Survey of the Drugged Kinome	30362749	Kinase	NA	Quercetin (Sophoretin)	O=C1C(O)=C(c2cc(O)c(O)cc2)Oc2c1c(O)cc(O)c2	5.34	-4.28	1.08	literature	O=C1C(O)=C(c2cc(O)c(O)cc2)Oc2c1c(O)cc(O)c2	2.032	127.45	302.238	131.36	0
FGFR4	FGFR4_30362749	Fluorescent ligand-binding assay	J Am Chem Soc.	Binding Kinetics Survey of the Drugged Kinome	30362749	Kinase	NA	R406	Fc1c(Nc2nc3NC(=O)C(C)(C)Oc3cc2)nc(Nc2cc(OC)c(OC)c(OC)c2)nc1	5.21	-4.84	0.46	literature	Fc1c(Nc2nc3NC(=O)C(C)(C)Oc3cc2)nc(Nc2cc(OC)c(OC)c(OC)c2)nc1	1.87148	128.75	470.461	128.75	2
FGFR4	FGFR4_30362749	Fluorescent ligand-binding assay	J Am Chem Soc.	Binding Kinetics Survey of the Drugged Kinome	30362749	Kinase	NA	R788 (Fostamatinib) - prodrug	P(=O)(OCN1C(=O)C(C)(C)Oc2c1nc(Nc1c(F)cnc(Nc3cc(OC)c(OC)c(OC)c3)n1)cc2)(O)O	4.69	-3.82	1.05	literature	P(=O)(OCN1C(=O)C(C)(C)Oc2c1nc(Nc1c(F)cnc(Nc3cc(OC)c(OC)c(OC)c3)n1)cc2)(O)O	0.59748	186.72	580.466	186.72	4
FGFR4	FGFR4_30362749	Fluorescent ligand-binding assay	J Am Chem Soc.	Binding Kinetics Survey of the Drugged Kinome	30362749	Kinase	NA	SP600125	O=C1c2c3c([nH]nc3-c3c1cccc3)ccc2	5.54	-4.29	1.19	literature	O=C1c2c3c([nH]nc3-c3c1cccc3)ccc2	3.233	45.75	220.231	45.75	0
FGFR4	FGFR4_30362749	Fluorescent ligand-binding assay	J Am Chem Soc.	Binding Kinetics Survey of the Drugged Kinome	30362749	Kinase	NA	Semaxanib (SU5416)	O=C1/C(=C\c2c(C)cc(C)[nH]2)/c2c(N1)cccc2	5.06	-3.2	1.83	literature	O=C1/C(=C\c2c(C)cc(C)[nH]2)/c2c(N1)cccc2	2.562	44.89	238.29	44.89	3
FGFR4	FGFR4_30362749	Fluorescent ligand-binding assay	J Am Chem Soc.	Binding Kinetics Survey of the Drugged Kinome	30362749	Kinase	NA	Staurosporine	O(C)[C@@H]1[C@H](NC)C[C@H]2O[C@]1(C)n1c3c4n2c2c(c4c4C(=O)NCc4c3c3c1cccc3)cccc2	7.05	-5.87	1.24	literature	O(C)[C@@H]1[C@H](NC)C[C@H]2O[C@]1(C)n1c3c4n2c2c(c4c4C(=O)NCc4c3c3c1cccc3)cccc2	6.35953	69.45	466.541	69.45	0
FGFR4	FGFR4_30362749	Fluorescent ligand-binding assay	J Am Chem Soc.	Binding Kinetics Survey of the Drugged Kinome	30362749	Kinase	NA	Sunitinib Malate (Sutent)	Fc1cc2/C(=C/c3c(C)c(C(=O)NCCN(CC)CC)c(C)[nH]3)/C(=O)Nc2cc1.O=C(O)[C@@H](O)CC(=O)O	5.61	-4.74	0.81	literature	Fc1cc2/C(=C/c3c(C)c(C(=O)NCCN(CC)CC)c(C)[nH]3)/C(=O)Nc2cc1	2.569	77.23	398.482	77.23	0
FGFR4	FGFR4_30362749	Fluorescent ligand-binding assay	J Am Chem Soc.	Binding Kinetics Survey of the Drugged Kinome	30362749	Kinase	NA	TAE684 (NVP-TAE684)	Clc1c(Nc2c(S(=O)(=O)C(C)C)cccc2)nc(Nc2c(OC)cc(N3CCC(N4CCN(C)CC4)CC3)cc2)nc1	7.75	-5.83	1.92	literature	Clc1c(Nc2c(S(=O)(=O)C(C)C)cccc2)nc(Nc2c(OC)cc(N3CCC(N4CCN(C)CC4)CC3)cc2)nc1	3.959	102.93	614.215	102.93	0
FGFR4	FGFR4_30362749	Fluorescent ligand-binding assay	J Am Chem Soc.	Binding Kinetics Survey of the Drugged Kinome	30362749	Kinase	NA	TG101209	S(=O)(=O)(NC(C)(C)C)c1cc(Nc2c(C)cnc(Nc3ccc(N4CCN(C)CC4)cc3)n2)ccc1	6.42	-5.57	0.93	literature	S(=O)(=O)(NC(C)(C)C)c1cc(Nc2c(C)cnc(Nc3ccc(N4CCN(C)CC4)cc3)n2)ccc1	3.143	102.49	509.679	102.49	0
FGFR4	FGFR4_30362749	Fluorescent ligand-binding assay	J Am Chem Soc.	Binding Kinetics Survey of the Drugged Kinome	30362749	Kinase	NA	TG101348 (SAR302503)	S(=O)(=O)(NC(C)(C)C)c1cc(Nc2c(C)cnc(Nc3ccc(OCCN4CCCC4)cc3)n2)ccc1	5.8	-5.03	0.81	literature	S(=O)(=O)(NC(C)(C)C)c1cc(Nc2c(C)cnc(Nc3ccc(OCCN4CCCC4)cc3)n2)ccc1	4.068	108.48	524.69	108.48	3
FGFR4	FGFR4_30362749	Fluorescent ligand-binding assay	J Am Chem Soc.	Binding Kinetics Survey of the Drugged Kinome	30362749	Kinase	NA	TPCA-1	Fc1ccc(-c2sc(NC(=O)N)c(C(=O)N)c2)cc1	5.53	-4.33	1.11	literature	Fc1ccc(-c2sc(NC(=O)N)c(C(=O)N)c2)cc1	1.318	98.21	279.295	98.21	0
FGFR4	FGFR4_30362749	Fluorescent ligand-binding assay	J Am Chem Soc.	Binding Kinetics Survey of the Drugged Kinome	30362749	Kinase	NA	TSU-68 (SU6668)	O=C(O)CCc1c(C)c(/C=C/2\C(=O)Nc3c\2cccc3)[nH]c1C	5.67	-4.46	1.23	literature	O=C(O)CCc1c(C)c(/C=C/2\C(=O)Nc3c\2cccc3)[nH]c1C	2.374	82.19	310.353	82.19	0
FGFR4	FGFR4_30362749	Fluorescent ligand-binding assay	J Am Chem Soc.	Binding Kinetics Survey of the Drugged Kinome	30362749	Kinase	NA	Tivozanib (AV-951)	Clc1c(NC(=O)Nc2noc(C)c2)ccc(Oc2c3c(ncc2)cc(OC)c(OC)c3)c1	6	-5.3	0.63	literature	Clc1c(NC(=O)Nc2noc(C)c2)ccc(Oc2c3c(ncc2)cc(OC)c(OC)c3)c1	3.61574	107.74	454.87	107.74	3
FGFR4	FGFR4_30362749	Fluorescent ligand-binding assay	J Am Chem Soc.	Binding Kinetics Survey of the Drugged Kinome	30362749	Kinase	NA	Tofacitinib (CP-690550 - Tasocitinib)	O=C(CC#N)N1C[C@H](N(C)c2ncnc3[nH]ccc23)[C@H](C)CC1	4.6	-3.8	0.8	literature	O=C(CC#N)N1C[C@H](N(C)c2ncnc3[nH]ccc23)[C@H](C)CC1	0.175	88.91	312.377	88.91	0
FGFR4	FGFR4_30362749	Fluorescent ligand-binding assay	J Am Chem Soc.	Binding Kinetics Survey of the Drugged Kinome	30362749	Kinase	NA	Vandetanib (Zactima)	Brc1cc(F)c(Nc2ncnc3c2cc(OC)c(OCC2CCN(C)CC2)c3)cc1	5.22	-4.03	1.24	literature	Brc1cc(F)c(Nc2ncnc3c2cc(OC)c(OCC2CCN(C)CC2)c3)cc1	4.16674	59.51	475.362	59.51	4
FGFR4	FGFR4_30362749	Fluorescent ligand-binding assay	J Am Chem Soc.	Binding Kinetics Survey of the Drugged Kinome	30362749	Kinase	NA	WHI-P154	Brc1c(O)ccc(Nc2ncnc3c2cc(OC)c(OC)c3)c1	5.08	-3.87	0.98	literature	Brc1c(O)ccc(Nc2ncnc3c2cc(OC)c(OC)c3)c1	3.00974	76.5	376.21	76.5	0
FGFR4	FGFR4_30362749	Fluorescent ligand-binding assay	J Am Chem Soc.	Binding Kinetics Survey of the Drugged Kinome	30362749	Kinase	NA	WYE-687	O=C(OC)Nc1ccc(-c2nc(N3CCOCC3)c3c(n(C4CCN(Cc5cnccc5)CC4)nc3)n2)cc1	5.04	-3.28	1.73	literature	O=C(OC)Nc1ccc(-c2nc(N3CCOCC3)c3c(n(C4CCN(Cc5cnccc5)CC4)nc3)n2)cc1	1.88753	110.53	528.617	110.53	0
FGFR4	FGFR4_30362749	Fluorescent ligand-binding assay	J Am Chem Soc.	Binding Kinetics Survey of the Drugged Kinome	30362749	Kinase	NA	WZ3146	Clc1c(Oc2cc(NC(=O)C=C)ccc2)nc(Nc2ccc(N3CCN(C)CC3)cc2)nc1	6.28	-4.63	0.83	literature	Clc1c(Oc2cc(NC(=O)C=C)ccc2)nc(Nc2ccc(N3CCN(C)CC3)cc2)nc1	3.187	82.62	464.957	82.62	0
FGFR4	FGFR4_30362749	Fluorescent ligand-binding assay	J Am Chem Soc.	Binding Kinetics Survey of the Drugged Kinome	30362749	Kinase	NA	WZ4002	Clc1c(Oc2cc(NC(=O)C=C)ccc2)nc(Nc2c(OC)cc(N3CCN(C)CC3)cc2)nc1	5.23	-4.67	0.85	literature	Clc1c(Oc2cc(NC(=O)C=C)ccc2)nc(Nc2c(OC)cc(N3CCN(C)CC3)cc2)nc1	3.178	91.85	494.983	91.85	0
FLT3	FLT3_30362749	Fluorescent ligand-binding assay	J Am Chem Soc.	Binding Kinetics Survey of the Drugged Kinome	30362749	Kinase	NA	AEE788 (NVP-AEE788)	N([C@H](C)c1ccccc1)c1ncnc2[nH]c(-c3ccc(CN4CCN(CC)CC4)cc3)cc12	5.78	-3.13	2.65	literature	N([C@H](C)c1ccccc1)c1ncnc2[nH]c(-c3ccc(CN4CCN(CC)CC4)cc3)cc12	4.119	60.08	440.595	60.08	0
FLT3	FLT3_30362749	Fluorescent ligand-binding assay	J Am Chem Soc.	Binding Kinetics Survey of the Drugged Kinome	30362749	Kinase	NA	AT9283	O=C(Nc1c(-c2[nH]c3c(n2)cc(CN2CCOCC2)cc3)n[nH]c1)NC1CC1	6.06	-3.71	2.35	literature	O=C(Nc1c(-c2[nH]c3c(n2)cc(CN2CCOCC2)cc3)n[nH]c1)NC1CC1	1.13706	110.96	381.44	110.96
FLT3	FLT3_30362749	Fluorescent ligand-binding assay	J Am Chem Soc.	Binding Kinetics Survey of the Drugged Kinome	30362749	Kinase	NA	AZ 960	Fc1c(Nc2n[nH]c(C)c2)nc(N[C@@H](C)c2ccc(F)cc2)c(C#N)c1	5.8	-3.3	2.5	literature	Fc1c(Nc2n[nH]c(C)c2)nc(N[C@@H](C)c2ccc(F)cc2)c(C#N)c1	3.894	89.42	354.364	89.42	0
FLT3	FLT3_30362749	Fluorescent ligand-binding assay	J Am Chem Soc.	Binding Kinetics Survey of the Drugged Kinome	30362749	Kinase	NA	AZD7762	Fc1cc(-c2sc(C(=O)N[C@@H]3CNCCC3)c(NC(=O)N)c2)ccc1	6.68	-3.94	2.74	literature	Fc1cc(-c2sc(C(=O)N[C@@H]3CNCCC3)c(NC(=O)N)c2)ccc1	1.64	96.25	362.429	96.25	0
FLT3	FLT3_30362749	Fluorescent ligand-binding assay	J Am Chem Soc.	Binding Kinetics Survey of the Drugged Kinome	30362749	Kinase	NA	Axitinib	S(c1c(C(=O)NC)cccc1)c1cc2[nH]nc(/C=C/c3ncccc3)c2cc1	5.9	-3.39	2.51	literature	S(c1c(C(=O)NC)cccc1)c1cc2[nH]nc(/C=C/c3ncccc3)c2cc1	4.643	70.67	386.479	70.67	0
FLT3	FLT3_30362749	Fluorescent ligand-binding assay	J Am Chem Soc.	Binding Kinetics Survey of the Drugged Kinome	30362749	Kinase	NA	BIBF1120 (Vargatef)	O=C(N(C)c1ccc(N/C(/c2ccccc2)=C/2\C(=O)Nc3c\2ccc(C(=O)OC)c3)cc1)CN1CCN(C)CC1	8.84	-6.48	2.38	literature	O=C(N(C)c1ccc(N/C(/c2ccccc2)=C/2\C(=O)Nc3c\2ccc(C(=O)OC)c3)cc1)CN1CCN(C)CC1	3.507	94.22	539.636	94.22	0
FLT3	FLT3_30362749	Fluorescent ligand-binding assay	J Am Chem Soc.	Binding Kinetics Survey of the Drugged Kinome	30362749	Kinase	NA	BIX 02188	O=C(N)c1cc2NC(=O)/C(=C(\Nc3cc(CN(C)C)ccc3)/c3ccccc3)/c2cc1	6.59	-4.98	2.34	literature	O=C(N)c1cc2NC(=O)/C(=C(\Nc3cc(CN(C)C)ccc3)/c3ccccc3)/c2cc1	3.831	87.46	412.493	87.46	0
FLT3	FLT3_30362749	Fluorescent ligand-binding assay	J Am Chem Soc.	Binding Kinetics Survey of the Drugged Kinome	30362749	Kinase	NA	BX-795	Ic1c(NCCCNC(=O)c2sccc2)nc(Nc2cc(NC(=O)N3CCCC3)ccc2)nc1	6.04	-3.67	2.37	literature	Ic1c(NCCCNC(=O)c2sccc2)nc(Nc2cc(NC(=O)N3CCCC3)ccc2)nc1	3.106	111.28	591.478	111.28	0
FLT3	FLT3_30362749	Fluorescent ligand-binding assay	J Am Chem Soc.	Binding Kinetics Survey of the Drugged Kinome	30362749	Kinase	NA	BX-912	Brc1c(NCCc2[nH]cnc2)nc(Nc2cc(NC(=O)N3CCCC3)ccc2)nc1	6.6	-4.39	2.22	literature	Brc1c(NCCc2[nH]cnc2)nc(Nc2cc(NC(=O)N3CCCC3)ccc2)nc1	1.234	110.86	471.363	110.86	0
FLT3	FLT3_30362749	Fluorescent ligand-binding assay	J Am Chem Soc.	Binding Kinetics Survey of the Drugged Kinome	30362749	Kinase	NA	Barasertib (AZD1152-HQPA)	P(=O)(OCCN(CCCOc1cc2ncnc(Nc3[nH]nc(CC(=O)Nc4cc(F)ccc4)c3)c2cc1)CC)(O)O	7.1	-4.14	2.95	literature	P(=O)(OCCN(CCCOc1cc2ncnc(Nc3[nH]nc(CC(=O)Nc4cc(F)ccc4)c3)c2cc1)CC)(O)O	1.886	174.82	587.549	174.82
FLT3	FLT3_30362749	Fluorescent ligand-binding assay	J Am Chem Soc.	Binding Kinetics Survey of the Drugged Kinome	30362749	Kinase	NA	CCT137690	Brc1c(N2CCN(Cc3noc(C)c3)CC2)c2[nH]c(-c3ccc(N4CCN(C)CC4)cc3)nc2nc1	5.58	-3.85	1.73	literature	Brc1c(N2CCN(Cc3noc(C)c3)CC2)c2[nH]c(-c3ccc(N4CCN(C)CC4)cc3)nc2nc1	2.25753	80.56	551.493	80.56	0
FLT3	FLT3_30362749	Fluorescent ligand-binding assay	J Am Chem Soc.	Binding Kinetics Survey of the Drugged Kinome	30362749	Kinase	NA	CEP33779	S(=O)(=O)(C)c1ccc(C=2c3n(nc(Nc4cc(N5CCN(C)CC5)ccc4)n3)C=CC=2)cc1	5.77	-3.42	2.35	literature	S(=O)(=O)(C)c1ccc(C=2c3n(nc(Nc4cc(N5CCN(C)CC5)ccc4)n3)C=CC=2)cc1	1.624	83.36	462.578	82.84	0
FLT3	FLT3_30362749	Fluorescent ligand-binding assay	J Am Chem Soc.	Binding Kinetics Survey of the Drugged Kinome	30362749	Kinase	NA	CHIR-124	Clc1cc2C(N[C@H]3C4CCN(C3)CC4)=C(c3[nH]c4c(n3)cccc4)C(=O)Nc2cc1	6.83	-4.11	2.63	literature	Clc1cc2C(N[C@H]3C4CCN(C3)CC4)=C(c3[nH]c4c(n3)cccc4)C(=O)Nc2cc1	3.375	73.05	419.916	76.81	0
FLT3	FLT3_30362749	Fluorescent ligand-binding assay	J Am Chem Soc.	Binding Kinetics Survey of the Drugged Kinome	30362749	Kinase	NA	CP 673451	O(CCOc1cc2ncn(-c3nc4c(N5CCC(N)CC5)cccc4cc3)c2cc1)C	6.33	-3.98	2.35	literature	O(CCOc1cc2ncn(-c3nc4c(N5CCC(N)CC5)cccc4cc3)c2cc1)C	3.25174	78.43	417.513	78.43	0
FLT3	FLT3_30362749	Fluorescent ligand-binding assay	J Am Chem Soc.	Binding Kinetics Survey of the Drugged Kinome	30362749	Kinase	NA	CYC116	N(c1nc(-c2c(C)nc(N)s2)ccn1)c1ccc(N2CCOCC2)cc1	6.55	-4.23	2.32	literature	N(c1nc(-c2c(C)nc(N)s2)ccn1)c1ccc(N2CCOCC2)cc1	1.126	89.19	368.465	89.19	1
FLT3	FLT3_30362749	Fluorescent ligand-binding assay	J Am Chem Soc.	Binding Kinetics Survey of the Drugged Kinome	30362749	Kinase	NA	Crenolanib (CP-868596)	O(CC1(C)COC1)c1cc2ncn(-c3nc4c(N5CCC(N)CC5)cccc4cc3)c2cc1	6.79	-4.1	2.69	literature	O(CC1(C)COC1)c1cc2ncn(-c3nc4c(N5CCC(N)CC5)cccc4cc3)c2cc1	3.834	78.43	443.551	78.43	3
FLT3	FLT3_30362749	Fluorescent ligand-binding assay	J Am Chem Soc.	Binding Kinetics Survey of the Drugged Kinome	30362749	Kinase	NA	Hesperadin	S(=O)(=O)(Nc1cc2/C(=C(/Nc3ccc(CN4CCCCC4)cc3)\c3ccccc3)/C(=O)Nc2cc1)CC	6.62	-4.25	2.37	literature	S(=O)(=O)(Nc1cc2/C(=C(/Nc3ccc(CN4CCCCC4)cc3)\c3ccccc3)/C(=O)Nc2cc1)CC	5.433	90.54	516.666	90.54	0
FLT3	FLT3_30362749	Fluorescent ligand-binding assay	J Am Chem Soc.	Binding Kinetics Survey of the Drugged Kinome	30362749	Kinase	NA	INK 128 (MLN0128)	Nc1oc2c(n1)cc(-c1nn(C(C)C)c3ncnc(N)c13)cc2	6.28	-4.01	2.27	literature	Nc1oc2c(n1)cc(-c1nn(C(C)C)c3ncnc(N)c13)cc2	0.97853	121.67	309.333	121.67	0
FLT3	FLT3_30362749	Fluorescent ligand-binding assay	J Am Chem Soc.	Binding Kinetics Survey of the Drugged Kinome	30362749	Kinase	NA	KW 2449	O=C(N1CCNCC1)c1ccc(/C=C/c2n[nH]c3c2cccc3)cc1	6.95	-4.66	2.29	literature	O=C(N1CCNCC1)c1ccc(/C=C/c2n[nH]c3c2cccc3)cc1	3.087	61.02	332.407	61.02	0
FLT3	FLT3_30362749	Fluorescent ligand-binding assay	J Am Chem Soc.	Binding Kinetics Survey of the Drugged Kinome	30362749	Kinase	NA	MGCD-265	S=C(NC(=O)Cc1ccc(F)cc1)Nc1cc(F)c(Oc2c3sc(-c4ncc(CNCCOC)cc4)cc3ncc2)cc1	6.88	-3.91	2.97	literature	S=C(NC(=O)Cc1ccc(F)cc1)Nc1cc(F)c(Oc2c3sc(-c4ncc(CNCCOC)cc4)cc3ncc2)cc1	5.155	129.49	619.717	97.4	2
FLT3	FLT3_30362749	Fluorescent ligand-binding assay	J Am Chem Soc.	Binding Kinetics Survey of the Drugged Kinome	30362749	Kinase	NA	Milciclib (PHA-848125)	O=C(NC)c1nn(C)c-2c1C(C)(C)Cc1c-2nc(Nc2ccc(N3CCN(C)CC3)cc2)nc1	5.99	-3.25	2.73	literature	O=C(NC)c1nn(C)c-2c1C(C)(C)Cc1c-2nc(Nc2ccc(N3CCN(C)CC3)cc2)nc1	0.92053	91.21	460.586	91.21	1
FLT3	FLT3_30362749	Fluorescent ligand-binding assay	J Am Chem Soc.	Binding Kinetics Survey of the Drugged Kinome	30362749	Kinase	NA	NVP-ADW742	O(Cc1ccccc1)c1cc(-c2c3c(N)ncnc3n(C3CC(CN4CCCC4)C3)c2)ccc1	6.32	-4	2.31	literature	O(Cc1ccccc1)c1cc(-c2c3c(N)ncnc3n(C3CC(CN4CCCC4)C3)c2)ccc1	5.319	69.2	453.59	69.2	0
FLT3	FLT3_30362749	Fluorescent ligand-binding assay	J Am Chem Soc.	Binding Kinetics Survey of the Drugged Kinome	30362749	Kinase	NA	PCI-32765 (Ibrutinib)	O=C(C=C)N1C[C@H](n2nc(-c3ccc(Oc4ccccc4)cc3)c3c(N)ncnc23)CCC1	5.98	-3.4	2.57	literature	O=C(C=C)N1C[C@H](n2nc(-c3ccc(Oc4ccccc4)cc3)c3c(N)ncnc23)CCC1	3.24753	99.16	440.507	99.16	0
FLT3	FLT3_30362749	Fluorescent ligand-binding assay	J Am Chem Soc.	Binding Kinetics Survey of the Drugged Kinome	30362749	Kinase	NA	PF-03814735	FC(F)(F)c1c(NC2CCC2)nc(Nc2cc3[C@@H]4N(C(=O)CNC(=O)C)[C@H](c3cc2)CC4)nc1	7.9	-5.64	2.27	literature	FC(F)(F)c1c(NC2CCC2)nc(Nc2cc3[C@@H]4N(C(=O)CNC(=O)C)[C@H](c3cc2)CC4)nc1	2.73576	99.25	474.487	99.25	0
FLT3	FLT3_30362749	Fluorescent ligand-binding assay	J Am Chem Soc.	Binding Kinetics Survey of the Drugged Kinome	30362749	Kinase	NA	PHA-665752	Clc1c(CS(=O)(=O)c2cc3/C(=C/c4c(C)c(C(=O)N5[C@@H](CN6CCCC6)CCC5)c(C)[nH]4)/C(=O)Nc3cc2)c(Cl)ccc1	6.44	-3.87	2.57	literature	Clc1c(CS(=O)(=O)c2cc3/C(=C/c4c(C)c(C(=O)N5[C@@H](CN6CCCC6)CCC5)c(C)[nH]4)/C(=O)Nc3cc2)c(Cl)ccc1	5.282	102.58	641.62	102.58	0
FLT3	FLT3_30362749	Fluorescent ligand-binding assay	J Am Chem Soc.	Binding Kinetics Survey of the Drugged Kinome	30362749	Kinase	NA	PIK-75	BrC1=Cn2c(/C=N/N(S(=O)(=O)c3c(C)ccc([N+](=O)[O-])c3)C)cnc2C=C1	6.34	-4.2	2.17	literature	BrC1=Cn2c(/C=N/N(S(=O)(=O)c3c(C)ccc([N+](=O)[O-])c3)C)cnc2C=C1	3.093	113.38	452.289	110.18	0
FLT3	FLT3_30362749	Fluorescent ligand-binding assay	J Am Chem Soc.	Binding Kinetics Survey of the Drugged Kinome	30362749	Kinase	NA	Quercetin (Sophoretin)	O=C1C(O)=C(c2cc(O)c(O)cc2)Oc2c1c(O)cc(O)c2	5.89	-3.12	2.77	literature	O=C1C(O)=C(c2cc(O)c(O)cc2)Oc2c1c(O)cc(O)c2	2.032	127.45	302.238	131.36	0
FLT3	FLT3_30362749	Fluorescent ligand-binding assay	J Am Chem Soc.	Binding Kinetics Survey of the Drugged Kinome	30362749	Kinase	NA	R406	Fc1c(Nc2nc3NC(=O)C(C)(C)Oc3cc2)nc(Nc2cc(OC)c(OC)c(OC)c2)nc1	6.49	-4.35	2.27	literature	Fc1c(Nc2nc3NC(=O)C(C)(C)Oc3cc2)nc(Nc2cc(OC)c(OC)c(OC)c2)nc1	1.87148	128.75	470.461	128.75	2
FLT3	FLT3_30362749	Fluorescent ligand-binding assay	J Am Chem Soc.	Binding Kinetics Survey of the Drugged Kinome	30362749	Kinase	NA	SP600125	O=C1c2c3c([nH]nc3-c3c1cccc3)ccc2	6.06	-3.75	2.31	literature	O=C1c2c3c([nH]nc3-c3c1cccc3)ccc2	3.233	45.75	220.231	45.75	0
FLT3	FLT3_30362749	Fluorescent ligand-binding assay	J Am Chem Soc.	Binding Kinetics Survey of the Drugged Kinome	30362749	Kinase	NA	Semaxanib (SU5416)	O=C1/C(=C\c2c(C)cc(C)[nH]2)/c2c(N1)cccc2	7.24	-4.73	2.51	literature	O=C1/C(=C\c2c(C)cc(C)[nH]2)/c2c(N1)cccc2	2.562	44.89	238.29	44.89	3
FLT3	FLT3_30362749	Fluorescent ligand-binding assay	J Am Chem Soc.	Binding Kinetics Survey of the Drugged Kinome	30362749	Kinase	NA	Staurosporine	O(C)[C@@H]1[C@H](NC)C[C@H]2O[C@]1(C)n1c3c4n2c2c(c4c4C(=O)NCc4c3c3c1cccc3)cccc2	8.29	-5.74	2.54	literature	O(C)[C@@H]1[C@H](NC)C[C@H]2O[C@]1(C)n1c3c4n2c2c(c4c4C(=O)NCc4c3c3c1cccc3)cccc2	6.35953	69.45	466.541	69.45	0
FLT3	FLT3_30362749	Fluorescent ligand-binding assay	J Am Chem Soc.	Binding Kinetics Survey of the Drugged Kinome	30362749	Kinase	NA	Sunitinib Malate (Sutent)	Fc1cc2/C(=C/c3c(C)c(C(=O)NCCN(CC)CC)c(C)[nH]3)/C(=O)Nc2cc1.O=C(O)[C@@H](O)CC(=O)O	8.93	-6.53	2.4	literature	Fc1cc2/C(=C/c3c(C)c(C(=O)NCCN(CC)CC)c(C)[nH]3)/C(=O)Nc2cc1	2.569	77.23	398.482	77.23	0
FLT3	FLT3_30362749	Fluorescent ligand-binding assay	J Am Chem Soc.	Binding Kinetics Survey of the Drugged Kinome	30362749	Kinase	NA	TAE684 (NVP-TAE684)	Clc1c(Nc2c(S(=O)(=O)C(C)C)cccc2)nc(Nc2c(OC)cc(N3CCC(N4CCN(C)CC4)CC3)cc2)nc1	6.01	-3.78	2.24	literature	Clc1c(Nc2c(S(=O)(=O)C(C)C)cccc2)nc(Nc2c(OC)cc(N3CCC(N4CCN(C)CC4)CC3)cc2)nc1	3.959	102.93	614.215	102.93	0
FLT3	FLT3_30362749	Fluorescent ligand-binding assay	J Am Chem Soc.	Binding Kinetics Survey of the Drugged Kinome	30362749	Kinase	NA	TAK-901	S(=O)(=O)(CC)c1cc(-c2c3c(c(C)c(C(=O)NC4CCN(C)CC4)c2)[nH]c2ncc(C)cc32)ccc1	6.46	-4.29	2.17	literature	S(=O)(=O)(CC)c1cc(-c2c3c(c(C)c(C(=O)NC4CCN(C)CC4)c2)[nH]c2ncc(C)cc32)ccc1	4.722	95.16	504.655	95.16	1
FLT3	FLT3_30362749	Fluorescent ligand-binding assay	J Am Chem Soc.	Binding Kinetics Survey of the Drugged Kinome	30362749	Kinase	NA	TG101209	S(=O)(=O)(NC(C)(C)C)c1cc(Nc2c(C)cnc(Nc3ccc(N4CCN(C)CC4)cc3)n2)ccc1	5.96	-3.4	2.55	literature	S(=O)(=O)(NC(C)(C)C)c1cc(Nc2c(C)cnc(Nc3ccc(N4CCN(C)CC4)cc3)n2)ccc1	3.143	102.49	509.679	102.49	0
FLT3	FLT3_30362749	Fluorescent ligand-binding assay	J Am Chem Soc.	Binding Kinetics Survey of the Drugged Kinome	30362749	Kinase	NA	TSU-68 (SU6668)	O=C(O)CCc1c(C)c(/C=C/2\C(=O)Nc3c\2cccc3)[nH]c1C	8.02	-5.69	2.32	literature	O=C(O)CCc1c(C)c(/C=C/2\C(=O)Nc3c\2cccc3)[nH]c1C	2.374	82.19	310.353	82.19	0
FLT3	FLT3_30362749	Fluorescent ligand-binding assay	J Am Chem Soc.	Binding Kinetics Survey of the Drugged Kinome	30362749	Kinase	NA	TWS119	O(c1ncnc2[nH]c(-c3cc(N)ccc3)cc12)c1cc(O)ccc1	5.93	-3.89	2.05	literature	O(c1ncnc2[nH]c(-c3cc(N)ccc3)cc12)c1cc(O)ccc1	3.011	97.05	318.336	97.05	0
FLT3	FLT3_30362749	Fluorescent ligand-binding assay	J Am Chem Soc.	Binding Kinetics Survey of the Drugged Kinome	30362749	Kinase	NA	Tivozanib (AV-951)	Clc1c(NC(=O)Nc2noc(C)c2)ccc(Oc2c3c(ncc2)cc(OC)c(OC)c3)c1	6.93	-3.96	2.98	literature	Clc1c(NC(=O)Nc2noc(C)c2)ccc(Oc2c3c(ncc2)cc(OC)c(OC)c3)c1	3.61574	107.74	454.87	107.74	3
FLT3	FLT3_30362749	Fluorescent ligand-binding assay	J Am Chem Soc.	Binding Kinetics Survey of the Drugged Kinome	30362749	Kinase	NA	Torin 2	FC(F)(F)c1cc(N2C(=O)C=Cc3c2c2c(nc3)ccc(-c3cnc(N)cc3)c2)ccc1	5.95	-3.42	2.52	literature	FC(F)(F)c1cc(N2C(=O)C=Cc3c2c2c(nc3)ccc(-c3cnc(N)cc3)c2)ccc1	5.05176	72.11	432.405	73.8	0
FLT3	FLT3_30362749	Fluorescent ligand-binding assay	J Am Chem Soc.	Binding Kinetics Survey of the Drugged Kinome	30362749	Kinase	NA	VX-680 (MK-0457 - Tozasertib)	S(c1nc(Nc2n[nH]c(C)c2)cc(N2CCN(C)CC2)n1)c1ccc(NC(=O)C2CC2)cc1	6.09	-3.89	2.2	literature	S(c1nc(Nc2n[nH]c(C)c2)cc(N2CCN(C)CC2)n1)c1ccc(NC(=O)C2CC2)cc1	2.586	102.07	464.598	102.07	2
FLT3	FLT3_30362749	Fluorescent ligand-binding assay	J Am Chem Soc.	Binding Kinetics Survey of the Drugged Kinome	30362749	Kinase	NA	WZ3146	Clc1c(Oc2cc(NC(=O)C=C)ccc2)nc(Nc2ccc(N3CCN(C)CC3)cc2)nc1	6.13	-3.81	2.32	literature	Clc1c(Oc2cc(NC(=O)C=C)ccc2)nc(Nc2ccc(N3CCN(C)CC3)cc2)nc1	3.187	82.62	464.957	82.62	0
FLT3	FLT3_30362749	Fluorescent ligand-binding assay	J Am Chem Soc.	Binding Kinetics Survey of the Drugged Kinome	30362749	Kinase	NA	WZ8040	Clc1c(Sc2cc(NC(=O)C=C)ccc2)nc(Nc2ccc(N3CCN(C)CC3)cc2)nc1	6.57	-4.09	2.49	literature	Clc1c(Sc2cc(NC(=O)C=C)ccc2)nc(Nc2ccc(N3CCN(C)CC3)cc2)nc1	3.823	73.39	481.024	73.39	0
[truncated: 2,495 more rows]
